# Supplementary material
Source: publisher figshare collection journal article supplement (https://gsapubs.figshare.com/ndownloader/files/37429957)
Supplement: Supplementary file 1 [file 37429957]

## Sheet: Sheet1
AOS-207 BIAS
							Isotope ratios						Apparent ages (Ma)
Analysis	U	206Pb	U/Th	206Pb*	±	207Pb*	±	206Pb*	±	error	206Pb*	±	207Pb*	±	206Pb*	±	Best age	±	Conc
	(ppm)	204Pb		207Pb*	(%)	235U*	(%)	238U	(%)	corr.	238U*	(Ma)	235U	(Ma)	207Pb*	(Ma)	(Ma)	(Ma)	(%)
-Spot 103	1007.59	1.71919e+06	3.11955	18.8144	0.727715	0.371989	1.55493	0.0507819	1.37413	0.883726	319.32	4.28098	321.127	4.28078	334.266	16.5169	319.32	4.28098	NA
-Spot 77	335.822	59958.2	1.23136	18.4545	1.13156	0.434213	1.41359	0.0581424	0.847241	0.599354	364.318	3.00105	366.164	4.34556	377.844	25.4308	364.318	3.00105	NA
-Spot 46	875.798	117295	2.11173	18.0817	0.799555	0.468815	1.37587	0.0615077	1.1197	0.813812	384.788	4.18239	390.37	4.45906	423.561	17.8411	384.788	4.18239	NA
-Spot 23	414.691	70408.8	12.1923	18.2054	0.976907	0.48816	1.4822	0.0644836	1.11471	0.752063	402.835	4.35302	403.656	4.93689	408.334	21.8568	402.835	4.35302	98.6532
-Spot 114	423.212	358941	6.23411	18.2926	0.995786	0.490367	1.58406	0.0650857	1.23193	0.777706	406.48	4.85296	405.161	5.29217	397.624	22.3211	406.48	4.85296	102.227
-Spot 86	760.191	27254.4	4.97303	18.2932	1.0451	0.496214	2.02768	0.0658638	1.73759	0.856939	411.188	6.92168	409.136	6.82826	397.553	23.427	411.188	6.92168	103.43
-Spot 107	478.59	22593.1	3.57232	18.4456	0.926339	0.496102	1.48266	0.0663974	1.15767	0.780801	414.415	4.64658	409.061	4.99213	378.93	20.8329	414.415	4.64658	109.365
-Spot 55	409.897	31506.8	3.382	18.2513	1.11112	0.503993	1.60273	0.066743	1.15506	0.720682	416.503	4.65875	414.402	5.45348	402.693	24.8849	416.503	4.65875	103.429
-Spot 6	579.078	76918.7	1.588	17.9486	0.778382	0.5221	1.33307	0.0679944	1.08222	0.811825	424.061	4.44158	426.554	4.64298	440.022	17.3283	424.061	4.44158	96.3727
-Spot 115	564.908	26568.7	3.11611	18.0111	0.971826	0.527732	1.85806	0.0689672	1.58365	0.852313	429.93	6.58652	430.304	6.51722	432.282	21.6687	429.93	6.58652	99.4559
-Spot 13	502.632	110370	1.40764	17.7496	0.992265	0.553636	1.49754	0.0713018	1.12163	0.748978	443.994	4.81234	447.376	5.41862	464.797	21.9903	443.994	4.81234	95.5243
-Spot 45	1211.1	38971	1.79165	17.6484	0.774508	0.64083	1.58636	0.082061	1.38444	0.872716	508.413	6.76829	502.82	6.29097	477.429	17.1439	508.413	6.76829	106.49
-Spot 88	1322.74	11110.4	1.11257	14.3463	0.976032	0.816814	1.76713	0.0850257	1.47312	0.833627	526.051	7.44163	606.269	8.06713	918.784	20.091	526.051	7.44163	57.2552
-Spot 25	85.5685	34545.9	2.4714	16.8204	1.2936	0.697706	1.63261	0.0851523	0.995999	0.610065	526.803	5.03829	537.42	6.81285	582.707	28.0692	526.803	5.03829	90.4061
-Spot 36	599.406	153747	1.03827	17.1253	0.983856	0.700762	1.72096	0.0870755	1.41199	0.820469	538.218	7.291	539.246	7.20003	543.585	21.5258	538.218	7.291	99.0128
-Spot 5	444.297	65882.7	1.97855	16.7414	0.807204	0.797339	1.10133	0.0968554	0.74924	0.680302	595.954	4.26495	595.326	4.96096	592.957	17.4983	595.954	4.26495	100.505
-Spot 26	635.517	236643	6.04525	16.5656	0.963855	0.8966	1.9617	0.107769	1.70858	0.87097	659.779	10.7152	649.909	9.41669	615.76	20.8156	659.779	10.7152	107.149
-Spot 110	599.544	56527	11.5503	14.253	0.90227	1.44373	1.57083	0.149307	1.28585	0.818581	897.08	10.7685	907.271	9.42333	932.17	18.5041	932.17	18.5041	96.2357
-Spot 29	62.1804	191106	2.95715	14.1487	1.42095	1.57229	1.8392	0.161412	1.16771	0.634902	964.618	10.4617	959.329	11.4154	947.245	29.0848	947.245	29.0848	101.834
-Spot 69	200.598	64616.6	2.95262	13.977	0.738436	1.57597	1.29091	0.159826	1.05885	0.820234	955.811	9.40606	960.781	8.0194	972.168	15.0603	972.168	15.0603	98.3175
-Spot 37	171.058	23487.2	1.27778	13.9007	0.930219	1.62477	1.40729	0.163876	1.05601	0.750386	978.281	9.58509	979.838	8.84557	983.326	18.937	983.326	18.937	99.4869
-Spot 59	96.0006	6674.73	2.04742	13.8666	1.00723	1.63092	1.58707	0.164093	1.22649	0.772804	979.48	11.1451	982.214	9.99	988.348	20.488	988.348	20.488	99.1028
-Spot 92	340.511	80907.4	7.00516	13.8371	0.734081	1.66185	1.28737	0.166849	1.05756	0.821492	994.728	9.74841	994.08	8.16111	992.67	14.9253	992.67	14.9253	100.207
-Spot 84	140.187	18710.8	4.67284	13.7845	0.967994	1.56952	1.6663	0.15698	1.3563	0.813958	939.974	11.863	958.235	10.335	1000.37	19.6377	1000.37	19.6377	93.9628
-Spot 52	810.443	105974	2.97889	13.7597	0.746105	1.69966	1.45938	0.16969	1.25424	0.859433	1010.4	11.7297	1008.4	9.3296	1004.03	15.1241	1004.03	15.1241	100.634
-Spot 21	570.984	344957	2.09539	13.7433	0.764111	1.67135	1.86658	0.166667	1.70302	0.912371	993.718	15.6834	997.7	11.8586	1006.44	15.4906	1006.44	15.4906	98.7358
-Spot 78	789.186	389549	25.042	13.7233	0.805683	1.74429	1.5691	0.173686	1.34646	0.858109	1032.39	12.8447	1025.05	10.1271	1009.41	16.3302	1009.41	16.3302	102.276
-Spot 20	797.587	182152	2.31616	13.7003	0.896245	1.68359	1.7709	0.167361	1.52736	0.862477	997.555	14.1159	1002.34	11.2814	1012.8	18.1524	1012.8	18.1524	98.4944
-Spot 16	331.535	74692.7	3.87135	13.6977	0.823382	1.76358	1.41934	0.17528	1.15611	0.814535	1041.14	11.1149	1032.16	9.19713	1013.18	16.6891	1013.18	16.6891	102.759
-Spot 74	270.18	27872.1	2.86186	13.6928	0.752149	1.73418	1.24829	0.172296	0.996246	0.798087	1024.75	9.43891	1021.3	8.03937	1013.91	15.2428	1013.91	15.2428	101.069
-Spot 10	417.639	471812	3.82696	13.6917	0.723842	1.71265	1.28264	0.170142	1.05887	0.825543	1012.9	9.92511	1013.28	8.22275	1014.08	14.6682	1014.08	14.6682	99.8834
-Spot 8	317.505	562999	4.06124	13.6692	0.782535	1.73614	1.16393	0.172193	0.861615	0.740262	1024.18	8.15921	1022.03	7.49916	1017.41	15.8501	1017.41	15.8501	100.665
-Spot 98	545.496	66084.6	5.48416	13.6608	0.702951	1.72756	1.44782	0.171237	1.26572	0.874224	1018.92	11.9292	1018.84	9.31143	1018.65	14.2353	1018.65	14.2353	100.027
-Spot 117	290.707	684667	5.29099	13.6434	0.999814	1.64106	1.49956	0.162456	1.11761	0.745291	970.41	10.0685	986.121	9.46133	1021.24	20.2396	1021.24	20.2396	95.023
-Spot 65	186.836	120793	3.13295	13.6352	1.2177	1.76934	1.70544	0.17505	1.19404	0.700136	1039.88	11.4668	1034.28	11.0641	1022.45	24.6659	1022.45	24.6659	101.705			Rejected Analyses
-Spot 61	271.975	75657.1	2.26192	13.6205	0.770297	1.73677	1.37642	0.171641	1.1407	0.828738	1021.15	10.7725	1022.27	8.86946	1024.64	15.585	1024.64	15.585	99.6593			206Pb/238U age	± (Ma)	206Pb/207Pb age	± (Ma)
-Spot 43	135.706	114439	3.76533	13.5904	1.07092	1.64056	1.59375	0.161775	1.18032	0.740596	966.636	10.5952	985.927	10.0545	1029.1	21.6724	1029.1	21.6724	93.93			1189.2	11.2131	1105.3	15.8497
-Spot 40	290.715	164903	6.76931	13.5752	0.88628	1.73721	1.61647	0.171114	1.35184	0.836293	1018.24	12.733	1022.43	10.4173	1031.37	17.9323	1031.37	17.9323	98.7269			1319.56	19.7471	1038.13	16.2526
-Spot 76	314.697	62122.5	2.59931	13.5706	0.79036	1.77899	1.21141	0.17517	0.918067	0.757849	1040.54	8.82171	1037.81	7.87438	1032.05	15.9923	1032.05	15.9923	100.822			1341.93	22.0044	1786.01	14.2014
-Spot 56	912.322	205878	3.45394	13.5648	0.674742	1.78916	1.48435	0.176097	1.32212	0.89071	1045.62	12.7614	1041.52	9.66839	1032.91	13.6532	1032.91	13.6532	101.23		Total	3
-Spot 104	266.197	65557.3	1.62076	13.4974	0.7668	1.85127	1.234	0.181304	0.966839	0.783499	1074.09	9.56571	1063.88	8.13554	1043.02	15.4903	1043.02	15.4903	102.979
-Spot 97	395.221	43947.6	3.76785	13.4925	0.779423	1.74628	1.2439	0.17096	0.969422	0.779343	1017.4	9.12398	1025.79	8.03142	1043.75	15.744	1043.75	15.744	97.4756
-Spot 1	114.227	14649.7	1.76584	13.49	0.954488	1.79015	1.54786	0.175222	1.21854	0.787238	1040.82	11.7119	1041.88	10.0841	1044.12	19.2748	1044.12	19.2748	99.6837
-Spot 32	259.552	542942	5.45975	13.4571	1.02741	1.73985	1.33065	0.169883	0.845609	0.635487	1011.47	7.91581	1023.41	8.58001	1049.05	20.7309	1049.05	20.7309	96.4177
-Spot 50	243.839	67219.1	10.4678	13.4256	0.82467	1.79365	1.2773	0.174726	0.975402	0.763645	1038.1	9.35241	1043.15	8.32717	1053.77	16.6303	1053.77	16.6303	98.5125
-Spot 41	1166.33	203020	3.96969	13.4005	0.854398	1.76276	1.80327	0.171396	1.58801	0.880629	1019.8	14.9785	1031.86	11.6831	1057.54	17.2203	1057.54	17.2203	96.4307
-Spot 11	469.73	85482.8	2.73079	13.381	0.65835	1.81692	1.2938	0.176406	1.11377	0.860855	1047.31	10.7664	1051.58	8.4736	1060.47	13.2475	1060.47	13.2475	98.7586
-Spot 34	175.114	62248.9	5.4645	13.371	1.01784	1.74095	1.57952	0.168903	1.20784	0.76469	1006.06	11.2509	1023.81	10.1872	1061.98	20.4979	1061.98	20.4979	94.7348
-Spot 4	312.76	140280	4.14884	13.3183	0.801864	1.81866	1.55576	0.175747	1.33319	0.85694	1043.7	12.8465	1052.2	10.1928	1069.92	16.1005	1069.92	16.1005	97.5491
-Spot 111	277.489	2.08872e+06	2.59765	13.3151	0.804145	1.85228	1.54055	0.178953	1.31402	0.852954	1061.25	12.8577	1064.24	10.1586	1070.39	16.1558	1070.39	16.1558	99.1461
-Spot 83	693.427	136557	4.37318	13.2893	0.729453	1.85224	1.50365	0.178602	1.31486	0.874447	1059.33	12.8445	1064.23	9.91522	1074.3	14.63	1074.3	14.63	98.6069
-Spot 30	163.262	32842.8	5.57938	13.2689	0.844737	1.85269	1.39615	0.178371	1.1116	0.796189	1058.07	10.847	1064.39	9.20707	1077.37	16.9438	1077.37	16.9438	98.2089
-Spot 58	579.628	162173	2.62481	13.2573	0.959701	1.94441	1.4734	0.187038	1.11799	0.758778	1105.31	11.3559	1096.52	9.87997	1079.12	19.2405	1079.12	19.2405	102.428
-Spot 91	448.739	88682.2	2.13207	13.2097	0.755557	1.82372	1.46448	0.174799	1.25453	0.856637	1038.5	12.0331	1054.02	9.60427	1086.32	15.1463	1086.32	15.1463	95.5981
-Spot 57	292.105	97090.8	2.64872	13.1897	0.631292	1.87368	1.15095	0.179316	0.962371	0.836153	1063.24	9.43299	1071.83	7.61995	1089.35	12.6594	1089.35	12.6594	97.603
-Spot 108	414.928	104280	1.07367	13.1632	0.763696	1.92433	1.2681	0.183792	1.01235	0.798318	1087.66	10.1321	1089.57	8.47318	1093.42	15.2743	1093.42	15.2743	99.4735
-Spot 63	203.078	38460.2	3.58498	12.9579	0.883792	2.1316	1.65754	0.200414	1.40227	0.845993	1177.54	15.092	1159.1	11.4565	1124.78	17.6157	1124.78	17.6157	104.691
-Spot 64	452.828	228159	4.29152	12.9089	0.619671	2.08187	1.04317	0.194997	0.839172	0.804445	1148.39	8.82737	1142.85	7.15535	1132.33	12.3288	1132.33	12.3288	101.419
-Spot 87	178.071	176889	1.85624	12.8972	0.988368	1.98942	1.54775	0.186171	1.19108	0.769554	1100.6	12.051	1111.93	10.4589	1134.16	19.6549	1134.16	19.6549	97.0409
-Spot 105	393.84	446949	3.17548	12.8373	0.637054	2.11343	1.28437	0.196856	1.11525	0.86832	1158.41	11.8249	1153.2	8.8528	1143.43	12.6538	1143.43	12.6538	101.31
-Spot 79	184.368	27850.3	3.81203	12.8209	0.854769	2.01188	1.54728	0.187158	1.28974	0.833556	1105.96	13.1076	1119.52	10.4949	1145.92	16.9658	1145.92	16.9658	96.5127
-Spot 71	128.683	77385.3	2.93765	12.8146	0.944442	2.03105	1.43924	0.188849	1.08602	0.754579	1115.14	11.121	1125.97	9.79274	1146.92	18.7577	1146.92	18.7577	97.2287
-Spot 68	616.911	131618	2.57321	12.8074	0.761444	1.97101	1.71615	0.183163	1.53798	0.896179	1084.23	15.3484	1105.65	11.5608	1148.04	15.1259	1148.04	15.1259	94.4416
-Spot 33	1412.72	422929	3.43595	12.8037	0.694468	2.1204	1.40384	0.196989	1.22003	0.869069	1159.13	12.9432	1155.47	9.68653	1148.61	13.7746	1148.61	13.7746	100.915
-Spot 75	256.463	1.26962e+06	3.48696	12.7718	0.726905	2.10936	1.4311	0.195474	1.23275	0.861396	1150.96	12.994	1151.87	9.85812	1153.55	14.4274	1153.55	14.4274	99.7753
-Spot 54	296.553	34614.7	6.19547	12.7529	0.676379	2.18444	1.07447	0.202134	0.834857	0.776998	1186.77	9.04933	1176.09	7.48406	1156.48	13.4192	1156.48	13.4192	102.619
-Spot 94	204.348	38977	4.00802	12.7423	0.88473	2.07729	1.42559	0.192058	1.11784	0.784124	1132.51	11.6101	1141.34	9.77165	1158.14	17.5598	1158.14	17.5598	97.7874
-Spot 9	372.643	258578	3.17624	12.7276	0.806306	2.1364	1.16788	0.197296	0.844876	0.723427	1160.78	8.97486	1160.66	8.07772	1160.43	15.9978	1160.43	15.9978	100.03
-Spot 22	561.969	140754	3.10519	12.7115	0.745838	2.04392	1.42662	0.188517	1.21613	0.852456	1113.33	12.435	1130.27	9.7271	1162.93	14.7905	1162.93	14.7905	95.7355
-Spot 67	326.655	80259.7	4.74021	12.6696	0.75418	2.14658	1.14674	0.197332	0.863844	0.753304	1160.97	9.17777	1163.95	7.94351	1169.51	14.9528	1169.51	14.9528	99.2698
-Spot 80	333.506	166623	3.07833	12.633	0.906319	2.14415	1.59486	0.196539	1.31231	0.822838	1156.7	13.8956	1163.16	11.0439	1175.24	17.9313	1175.24	17.9313	98.423
-Spot 35	249.144	139182	2.70872	12.5739	0.884143	2.13419	1.4098	0.194711	1.0981	0.778906	1146.84	11.5369	1159.94	9.74785	1184.52	17.4694	1184.52	17.4694	96.8197
-Spot 47	475.758	210877	2.55749	12.5708	0.865293	2.18501	1.42857	0.199299	1.1367	0.795689	1171.56	12.1771	1176.28	9.95149	1184.99	17.0944	1184.99	17.0944	98.8662
-Spot 100	343.188	370709	1.49167	12.4719	0.822909	2.28226	1.27396	0.20653	0.972523	0.763385	1210.31	10.7316	1206.82	8.99477	1200.56	16.2024	1200.56	16.2024	100.812
-Spot 112	276.58	83911.8	2.14381	12.3566	0.772688	2.32914	1.22643	0.208826	0.952411	0.776571	1222.56	10.6063	1221.22	8.7126	1218.86	15.2095	1218.86	15.2095	100.304
-Spot 95	353.339	48313	4.95119	12.2134	0.676165	2.37176	1.16584	0.210182	0.949726	0.814629	1229.79	10.6332	1234.13	8.32706	1241.7	13.2501	1241.7	13.2501	99.0403
-Spot 85	98.0293	46298.9	3.03034	12.188	0.937425	2.34008	1.33384	0.206943	0.94887	0.711384	1212.51	10.4879	1224.55	9.48897	1245.81	18.3582	1245.81	18.3582	97.3268
-Spot 44	294.747	3.36283e+06	1.5562	12.0064	0.82903	2.46075	1.38607	0.214372	1.11082	0.801411	1252.07	12.6409	1260.58	10.0076	1275.13	16.1679	1275.13	16.1679	98.1912
-Spot 15	239.268	735219	1.46656	11.8312	0.871335	2.45422	1.72912	0.210684	1.49353	0.863752	1232.46	16.7546	1258.67	12.475	1303.73	16.9239	1303.73	16.9239	94.5331
-Spot 7	188.501	25837.5	2.20704	11.7989	0.720841	2.67436	1.30189	0.228955	1.08411	0.832723	1329.02	13.0199	1321.4	9.62176	1309.04	13.9907	1309.04	13.9907	101.527
-Spot 116	166.985	39236.8	2.41232	11.7443	0.894805	2.67237	1.36724	0.227725	1.03377	0.756096	1322.56	12.3609	1320.85	10.1028	1318.05	17.3458	1318.05	17.3458	100.343
-Spot 109	222.005	72148.9	1.8523	11.3788	0.645404	2.89519	1.44473	0.239035	1.29255	0.894668	1381.68	16.0747	1380.66	10.9039	1379.07	12.4043	1379.07	12.4043	100.189
-Spot 14	754.703	166313	1.69186	11.0922	0.550963	3.0735	1.14935	0.247365	1.00869	0.877613	1424.87	12.8949	1426.11	8.80559	1427.93	10.519	1427.93	10.519	99.7856
-Spot 82	391.748	376144	1.71701	10.9936	0.826719	3.16621	1.42225	0.252562	1.1573	0.813708	1451.68	15.043	1448.96	10.9755	1444.95	15.7476	1444.95	15.7476	100.465
-Spot 118	210.952	32607.8	2.24728	10.9327	0.730439	3.16825	1.45645	0.251324	1.26004	0.865145	1445.3	16.3142	1449.46	11.2411	1455.53	13.8937	1455.53	13.8937	99.297
-Spot 89	282.447	70457.5	3.21668	10.8971	0.791036	3.1942	1.41887	0.252558	1.17791	0.83017	1451.65	15.3106	1455.76	10.9724	1461.73	15.0338	1461.73	15.0338	99.3106
-Spot 113	447.305	210143	2.49293	10.2718	0.661157	3.61672	1.54646	0.269557	1.398	0.904001	1538.55	19.1349	1553.22	12.3019	1573.2	12.3793	1573.2	12.3793	97.7976
-Spot 31	356.647	93829.2	0.771014	10.1291	0.808075	3.80308	1.37217	0.279508	1.109	0.808204	1588.88	15.6171	1593.4	11.0324	1599.36	15.0807	1599.36	15.0807	99.3449
-Spot 72	87.5664	95456.2	1.37474	9.85597	0.925393	4.08051	1.27064	0.291811	0.870728	0.685269	1650.57	12.6796	1650.42	10.3627	1650.2	17.1556	1650.2	17.1556	100.023
-Spot 12	257.118	2.21614e+06	0.61729	9.85371	0.666791	3.97662	1.29104	0.284316	1.10552	0.856302	1613.06	15.7767	1629.44	10.4753	1650.62	12.3619	1650.62	12.3619	97.7245
-Spot 28	648.239	142201	1.02999	9.84783	0.648417	4.02887	1.57291	0.28788	1.43304	0.911076	1630.93	20.6498	1640.04	12.7959	1651.73	12.0178	1651.73	12.0178	98.7404
-Spot 70	322.457	118635	1.79574	9.81843	0.84782	4.1242	1.4409	0.293812	1.16508	0.808574	1660.55	17.0558	1659.11	11.776	1657.27	15.7031	1657.27	15.7031	100.198
-Spot 93	207.369	58188.1	2.75752	9.80184	0.976446	3.9837	1.52617	0.283323	1.17292	0.768539	1608.08	16.693	1630.88	12.3876	1660.4	18.0786	1660.4	18.0786	96.8487
-Spot 106	556.774	151141	5.64763	9.425	0.786368	4.59556	1.35165	0.314273	1.09936	0.813344	1761.7	16.9465	1748.46	11.2722	1732.66	14.4264	1732.66	14.4264	101.676
-Spot 3	466.492	176508	3.17624	9.33973	0.649506	4.77494	1.31161	0.323586	1.1395	0.86878	1807.22	17.9585	1780.5	11.0121	1749.31	11.8905	1749.31	11.8905	103.311
-Spot 17	401.375	65512.9	3.73124	9.29287	0.816954	4.54002	1.81296	0.306123	1.61846	0.892717	1721.6	24.4531	1738.33	15.0868	1758.51	14.9412	1758.51	14.9412	97.9008
-Spot 60	397.544	160337	2.90207	8.99599	0.491458	4.93529	1.39627	0.322143	1.30692	0.936008	1800.19	20.5277	1808.31	11.7894	1817.67	8.92096	1817.67	8.92096	99.0382
-Spot 81	289.06	65200.2	3.05984	8.96269	0.706003	5.10943	1.08	0.332276	0.81729	0.756749	1849.4	13.1401	1837.67	9.17145	1824.4	12.8058	1824.4	12.8058	101.37
-Spot 53	447.086	168439	3.61929	8.92844	0.798172	5.01225	1.41517	0.32471	1.1686	0.825767	1812.69	18.4655	1821.39	11.9799	1831.34	14.4656	1831.34	14.4656	98.9816
-Spot 66	306.348	161551	1.37895	8.85955	0.728074	5.27491	1.30783	0.339089	1.08643	0.830711	1882.29	17.7347	1864.81	11.1636	1845.37	13.1725	1845.37	13.1725	102.001
-Spot 90	150.464	269147	1.05134	8.85574	0.747274	5.09045	1.28103	0.327091	1.04049	0.812229	1824.27	16.532	1834.51	10.8721	1846.15	13.5186	1846.15	13.5186	98.8148
-Spot 24	333.217	74740.4	2.11832	8.55619	0.623277	5.49018	1.16467	0.340843	0.983859	0.844754	1890.73	16.1224	1899.06	10.0041	1908.17	11.1933	1908.17	11.1933	99.086
-Spot 19	199.215	44624.5	1.87697	8.12693	0.77821	6.26312	1.32583	0.369322	1.07342	0.809617	2026.21	18.6633	2013.31	11.6093	2000.09	13.8236	2000.09	13.8236	101.306
-Spot 99	124.438	533062	1.23297	8.10713	0.733737	6.1008	1.37567	0.358874	1.16365	0.845883	1976.83	19.811	1990.36	12.0017	2004.42	13.027	2004.42	13.027	98.6236
-Spot 38	49.0938	19772.7	0.789668	7.66546	1.06069	7.13921	1.43412	0.397079	0.965215	0.673035	2155.57	17.6848	2128.95	12.7734	2103.32	18.6216	2103.32	18.6216	102.484
-Spot 62	306.749	84202.4	1.48834	6.49368	0.613272	9.53674	1.18277	0.449344	1.01136	0.855076	2392.34	20.2131	2391.09	10.8703	2390.02	10.4378	2390.02	10.4378	100.097
-Spot 18	168.338	266526	1.88978	5.87093	0.746193	11.5585	1.22361	0.492375	0.969751	0.792533	2580.94	20.6252	2569.32	11.4355	2560.15	12.4853	2560.15	12.4853	100.812
-Spot 48	218.865	139738	2.81504	5.86746	0.809692	10.8977	1.24328	0.463952	0.943468	0.758857	2456.98	19.2749	2514.44	11.5635	2561.14	13.5467	2561.14	13.5467	95.9332
-Spot 39	75.7112	54633.1	2.2213	5.79571	0.799396	11.73	1.38392	0.493277	1.12969	0.816298	2584.84	24.0564	2583.09	12.949	2581.71	13.3504	2581.71	13.3504	100.121
-Spot 2	265.43	20760	2.39989	5.65968	0.786943	11.7641	1.35204	0.483102	1.09942	0.813158	2540.76	23.0862	2585.81	12.6535	2621.29	13.0924	2621.29	13.0924	96.9279
-Spot 73	220.643	491498	2.65959	5.4218	0.691061	13.2404	1.27937	0.520872	1.07667	0.841564	2702.88	23.7707	2696.94	12.0789	2692.48	11.4167	2692.48	11.4167	100.386
-Spot 102	210.764	94525.4	0.86769	5.37992	0.751002	13.2968	1.42284	0.519051	1.20849	0.849356	2695.15	26.6197	2700.95	13.4375	2705.28	12.3957	2705.28	12.3957	99.6256
-Spot 96	322.309	267971	1.5977	5.34009	0.617329	13.7477	1.07072	0.532679	0.874839	0.817058	2752.73	19.6003	2732.48	10.135	2717.54	10.1775	2717.54	10.1775	101.295
-Spot 51	167.612	106008	3.60092	5.31516	0.699285	13.3081	1.41099	0.513239	1.22552	0.868552	2670.44	26.7949	2701.76	13.3264	2725.25	11.5169	2725.25	11.5169	97.9888
-Spot 101	217.618	201509	2.06471	5.03957	0.752065	15.7697	1.7153	0.576639	1.54164	0.898758	2935.02	36.3477	2862.95	16.3797	2812.6	12.2913	2812.6	12.2913	104.353
-Spot 120	497.684	710420	3.09329	5.01532	0.692262	14.9438	1.24968	0.543809	1.04042	0.83255	2799.37	23.6256	2811.67	11.8937	2820.48	11.3058	2820.48	11.3058	99.2517
-Spot 42	56.0532	24480.8	2.77935	3.98285	0.777255	21.4424	1.48804	0.619662	1.26891	0.85274	3108.57	31.2955	3158.81	14.437	3190.87	12.3012	3190.87	12.3012	97.4209
AOS-209 BIAS
							Isotope ratios						Apparent ages (Ma)
Analysis	U	206Pb	U/Th	206Pb*	±	207Pb*	±	206Pb*	±	error	206Pb*	±	207Pb*	±	206Pb*	±	Best age	±	Conc
	(ppm)	204Pb		207Pb*	(%)	235U*	(%)	238U	(%)	corr.	238U*	(Ma)	235U	(Ma)	207Pb*	(Ma)	(Ma)	(Ma)	(%)
-AOS 209 BIAS Spot 97	1275.37	12172.2	1.83827	19.0244	1.39798	0.12566	1.77751	0.0173458	1.09782	0.617615	110.86	1.20663	120.19	2.0148	309.034	31.823	110.86	1.20663	NA	High U
-AOS 209 BIAS Spot 122	124.646	3491.48	4.43819	21.2856	4.6008	0.1134	4.71178	0.0175141	1.01659	0.215756	111.926	1.12801	109.071	4.87282	47.1788	109.941	111.926	1.12801	NA
-AOS 209 BIAS Spot 43	803.127	54906.8	16.2185	20.1916	0.790425	0.119891	1.35937	0.0175648	1.10594	0.813571	112.247	1.23064	114.973	1.47767	171.75	18.4522	112.247	1.23064	NA	High U
-AOS 209 BIAS Spot 121	1261.35	54943.7	1.79983	20.5719	0.730919	0.118162	1.27788	0.0176376	1.0482	0.820269	112.708	1.17115	113.405	1.37118	128.067	17.2001	112.708	1.17115	NA
-AOS 209 BIAS Spot 103	1288.98	70960.9	1.68517	20.5677	0.830623	0.118337	1.42063	0.0176602	1.15249	0.811258	112.851	1.28928	113.563	1.52636	128.539	19.5449	112.851	1.28928	NA
-AOS 209 BIAS Spot 47	1228.96	57544.8	2.1866	20.5157	0.647934	0.119143	1.20352	0.0177355	1.01422	0.84271	113.328	1.13935	114.295	1.30096	134.495	15.2235	113.328	1.13935	NA
-AOS 209 BIAS Spot 19	368.381	143035	1.6442	20.3606	0.992941	0.122524	1.47048	0.0181008	1.08462	0.737591	115.642	1.24309	117.357	1.62973	152.307	23.2396	115.642	1.24309	NA
-AOS 209 BIAS Spot 26	90.6702	3775.59	3.67297	21.8132	1.83492	0.114672	2.07188	0.0181494	0.962144	0.464383	115.95	1.10563	110.23	2.16423	NA	NA	115.95	1.10563	NA
-AOS 209 BIAS Spot 79	118.337	4028.12	2.68774	21.9637	1.30283	0.114176	1.61245	0.0181956	0.950067	0.589208	116.242	1.09448	109.778	1.67778	NA	NA	116.242	1.09448	NA
-AOS 209 BIAS Spot 94	433.098	22459.8	1.6746	20.483	0.942877	0.122768	1.5789	0.0182459	1.26645	0.802111	116.561	1.46292	117.578	1.75299	138.212	22.1369	116.561	1.46292	NA
-AOS 209 BIAS Spot 92	425.658	10412.4	2.45463	20.9279	0.932845	0.121441	1.40693	0.0184408	1.0532	0.748586	117.794	1.22935	116.378	1.547	87.5317	22.1157	117.794	1.22935	NA
-AOS 209 BIAS Spot 35	525.567	23132.4	2.69988	20.8416	0.983112	0.122042	1.65414	0.0184556	1.33028	0.804217	117.888	1.554	116.922	1.82685	97.2759	23.2793	117.888	1.554	NA
-AOS 209 BIAS Spot 10	86.4102	16860.3	1.67041	19.2128	1.37368	0.186817	1.767	0.0260432	1.11143	0.628994	165.736	1.81856	173.91	2.82422	286.552	31.3964	165.736	1.81856	NA
-AOS 209 BIAS Spot 117	442.705	14362.9	2.50546	19.8354	0.898454	0.181867	1.55166	0.0261747	1.26509	0.815309	166.563	2.08017	169.666	2.42446	213.186	20.8146	166.563	2.08017	NA
-AOS 209 BIAS Spot 20	775.189	7585.26	3.83038	16.7664	2.04413	0.239906	3.50486	0.0291856	2.84703	0.812309	185.449	5.20458	218.344	6.8859	589.694	44.3587	185.449	5.20458	NA
-AOS 209 BIAS Spot 115	519.326	30557.8	1.70643	18.7862	0.866658	0.375557	1.59905	0.0511922	1.34382	0.840389	321.837	4.21873	323.764	4.43294	337.624	19.6339	321.837	4.21873	NA
-AOS 209 BIAS Spot 64	619.938	31814	22.966	16.8056	0.869204	0.463055	1.45229	0.0564645	1.16345	0.801118	354.089	4.00855	386.381	4.66721	584.655	18.8475	354.089	4.00855	NA
-AOS 209 BIAS Spot 90	211.096	130408	5.31424	18.0925	0.711786	0.442584	0.997233	0.0581009	0.698452	0.70039	364.066	2.47235	372.073	3.10658	422.226	15.8866	364.066	2.47235	NA
-AOS 209 BIAS Spot 71	131.149	23284.3	1.56303	18.1749	0.900271	0.458008	1.41549	0.0603995	1.0923	0.771676	378.054	4.01072	382.871	4.51493	412.077	20.1294	378.054	4.01072	NA
-AOS 209 BIAS Spot 16	90.5091	29068.9	1.64436	17.8742	1.05416	0.495798	1.6186	0.064301	1.22825	0.758836	401.729	4.78363	408.854	5.44759	449.266	23.4369	401.729	4.78363	89.4191
-AOS 209 BIAS Spot 60	108.403	16916.2	3.33866	16.2776	1.50007	0.554341	1.71902	0.0654718	0.839531	0.488378	408.817	3.32558	447.837	6.22511	653.519	32.2115	408.817	3.32558	62.5563
-AOS 209 BIAS Spot 61	132.029	8789.59	1.68837	17.9808	0.791033	0.51089	2.92164	0.0666535	2.81252	0.96265	415.963	11.3296	419.047	10.0315	436.04	17.6343	415.963	11.3296	95.3955
-AOS 209 BIAS Spot 100	105.191	33578.4	1.53988	17.6846	0.952176	0.531191	1.27133	0.0681606	0.842406	0.662617	425.064	3.46527	432.6	4.4783	472.913	21.0811	425.064	3.46527	89.8821
-AOS 209 BIAS Spot 78	114.494	65221.9	1.58808	17.8016	0.954208	0.528921	1.40383	0.0683184	1.02967	0.733474	426.016	4.24477	431.093	4.93121	458.293	21.1648	426.016	4.24477	92.9573
-AOS 209 BIAS Spot 5	239.178	22621.1	6.39514	18.0721	0.759614	0.522552	1.21195	0.0685214	0.944361	0.779206	427.242	3.90391	426.855	4.22353	424.746	16.9466	427.242	3.90391	100.588
-AOS 209 BIAS Spot 23	120.807	67083.3	2.11272	16.712	0.750614	0.78461	1.24855	0.0951418	0.997722	0.799106	585.875	5.58765	588.11	5.57378	596.75	16.2514	585.875	5.58765	98.1777
-AOS 209 BIAS Spot 106	268.398	37610.1	4.51726	16.5829	0.635004	0.815497	1.31449	0.0981231	1.15093	0.875576	603.4	6.62963	605.533	5.9954	613.501	13.7182	603.4	6.62963	98.3536
-AOS 209 BIAS Spot 34	67.8306	5567.52	1.17008	17.0425	2.12511	0.808794	2.41227	0.100013	1.14147	0.473195	614.487	6.69028	601.777	10.9527	554.161	46.3606	614.487	6.69028	110.886
-AOS 209 BIAS Spot 85	156.417	42190.9	1.60661	16.525	0.715842	0.859623	1.07	0.103071	0.795283	0.743253	632.381	4.79041	629.917	5.02228	621.059	15.4644	632.381	4.79041	101.823
-AOS 209 BIAS Spot 4	90.1646	102471	2.04384	16.2295	0.75925	0.880592	1.09532	0.103697	0.789473	0.720769	636.04	4.7816	641.302	5.20781	659.884	16.2644	636.04	4.7816	96.3866
-AOS 209 BIAS Spot 39	46.2265	10314.1	0.946333	16.4592	1.27462	0.870371	1.60375	0.103945	0.97333	0.606907	637.485	5.9079	635.769	7.57797	629.695	27.4818	637.485	5.9079	101.237
-AOS 209 BIAS Spot 22	66.0983	8909.85	1.01261	12.9834	2.62489	1.1268	2.81794	0.106151	1.02506	0.363761	650.356	6.34127	766.229	15.1606	1120.88	52.3581	650.356	6.34127	58.022
-AOS 209 BIAS Spot 53	161.686	52583.1	1.57216	14.4455	1.34403	1.17797	1.95502	0.123468	1.41975	0.726208	750.493	10.0583	790.367	10.7369	904.56	27.6827	750.493	10.0583	82.9678
-AOS 209 BIAS Spot 72	180.912	25391.6	2.45481	15.2042	1.02064	1.1707	1.6193	0.129151	1.25714	0.776351	783.021	9.26936	786.974	8.86776	798.175	21.4123	783.021	9.26936	98.1015
-AOS 209 BIAS Spot 55	37.2564	5313.55	1.89412	15.0227	1.22473	1.187	1.66579	0.129385	1.12911	0.677824	784.356	8.3387	794.566	9.18046	823.318	25.5787	784.356	8.3387	95.2676			Rejected Analyses
-AOS 209 BIAS Spot 83	60.279	21279.9	1.45089	14.2843	0.981688	1.48999	1.41357	0.15443	1.01708	0.719516	925.748	8.77079	926.313	8.58899	927.666	20.1628	927.666	20.1628	99.7932			206Pb/238U age	± (Ma)	206Pb/207Pb age	± (Ma)
-AOS 209 BIAS Spot 108	102.755	28513.5	2.78694	14.2316	0.842235	1.47781	1.2376	0.152603	0.906811	0.732715	915.537	7.73959	921.334	7.49498	935.241	17.2559	935.241	17.2559	97.8932			110.86	1.20663	309.034	31.823
-AOS 209 BIAS Spot 36	231.104	37896.3	4.64277	14.0203	0.638702	1.58111	1.15623	0.160844	0.963812	0.83358	961.467	8.6088	962.806	7.19181	965.875	13.0391	965.875	13.0391	99.5437			112.247	1.23064	171.75	18.4522
-AOS 209 BIAS Spot 124	112.918	32225.6	4.65015	13.9335	0.77155	1.52921	1.87897	0.154602	1.71325	0.911804	926.707	14.7884	942.18	11.5358	978.506	15.7025	978.506	15.7025	94.7063			247.693	22.1799	1052.57	28.1025
-AOS 209 BIAS Spot 30	78.8697	255882	2.03075	13.754	0.757898	1.65532	1.11191	0.165196	0.813598	0.73171	985.586	7.43581	991.586	7.03838	1004.87	15.3682	1004.87	15.3682	98.0814			738.019	9.33112	1510.11	26.4092
-AOS 209 BIAS Spot 87	164.126	67498.3	2.98584	13.7005	0.664894	1.72914	1.11647	0.171891	0.896896	0.803332	1022.52	8.4806	1019.43	7.18271	1012.78	13.4767	1012.78	13.4767	100.962			830.829	9.65836	1686	25.1301
-AOS 209 BIAS Spot 77	243.647	108889	2.58162	13.6957	0.534666	1.70194	1.33422	0.169128	1.22241	0.916195	1007.3	11.3996	1009.26	8.53369	1013.49	10.8359	1013.49	10.8359	99.3895			970.24	29.6781	880.868	56.0382
-AOS 209 BIAS Spot 3	116.224	38294.7	2.79912	13.6733	0.630134	1.75491	1.08022	0.174108	0.877392	0.812231	1034.7	8.3873	1028.97	6.98713	1016.8	12.7634	1016.8	12.7634	101.761			1741.81	18.2809	1638.87	10.421
-AOS 209 BIAS Spot 46	63.2687	31410.9	3.34807	13.6164	0.897593	1.79257	1.3109	0.177102	0.955395	0.72881	1051.13	9.26642	1042.76	8.54439	1025.25	18.1785	1025.25	18.1785	102.524		Total	7
-AOS 209 BIAS Spot 0	174.678	48472.5	3.32425	13.6098	0.657161	1.76095	1.10519	0.173894	0.88858	0.80401	1033.53	8.48538	1031.2	7.15749	1026.23	13.2926	1026.23	13.2926	100.711
-AOS 209 BIAS Spot 49	25.8176	24519.8	1.10033	13.5778	1.16889	1.72537	1.53714	0.16998	0.998254	0.649422	1012	9.34931	1018.03	9.88131	1030.99	23.646	1030.99	23.646	98.1585
-AOS 209 BIAS Spot 113	120.274	64711.2	2.60725	13.5622	0.665702	1.74725	1.02049	0.171938	0.773455	0.757928	1022.78	7.3151	1026.15	6.59022	1033.31	13.471	1033.31	13.471	98.9805
-AOS 209 BIAS Spot 67	63.6912	12773.5	1.16358	13.5276	0.736002	1.80496	1.1451	0.177164	0.877249	0.766086	1051.46	8.51097	1047.25	7.4821	1038.47	14.8795	1038.47	14.8795	101.251
-AOS 209 BIAS Spot 101	58.719	8868.44	1.5292	13.4662	0.890687	1.86768	1.2638	0.182488	0.896583	0.709435	1080.55	8.91962	1069.71	8.35774	1047.69	17.9771	1047.69	17.9771	103.137
-AOS 209 BIAS Spot 56	57.3571	49714.2	2.89539	13.4105	0.931371	1.78238	1.30404	0.173433	0.91273	0.699923	1031	8.69631	1039.05	8.48235	1056.04	18.7737	1056.04	18.7737	97.629
-AOS 209 BIAS Spot 6	31.4914	14304.2	1.2888	13.2716	1.15008	1.85067	1.54795	0.178213	1.03609	0.66933	1057.2	10.1026	1063.67	10.2043	1076.97	23.0868	1076.97	23.0868	98.1647
-AOS 209 BIAS Spot 51	86.5707	36367.4	1.81459	13.2666	0.738336	1.88177	1.34235	0.18114	1.12105	0.835142	1073.2	11.083	1074.69	8.90046	1077.68	14.8193	1077.68	14.8193	99.5844
-AOS 209 BIAS Spot 66	171.6	297281	4.1381	13.1918	0.628569	1.93193	1.10475	0.18492	0.908504	0.82236	1093.8	9.13987	1092.21	7.39163	1089.02	12.5922	1089.02	12.5922	100.438
-AOS 209 BIAS Spot 27	126.745	14924.5	0.715662	13.178	0.846393	1.84922	1.28319	0.176817	0.964465	0.751616	1049.56	9.3416	1063.15	8.45655	1091.16	16.9358	1091.16	16.9358	96.1877
-AOS 209 BIAS Spot 99	213.484	57499.8	2.31731	13.0953	0.711547	1.9129	1.21579	0.181759	0.985823	0.810849	1076.58	9.77426	1085.59	8.10707	1103.72	14.2453	1103.72	14.2453	97.5408
-AOS 209 BIAS Spot 119	223.398	898697	303.883	13.036	0.643135	1.88839	1.20603	0.178617	1.02024	0.845948	1059.42	9.96714	1077.02	8.00632	1112.79	12.8412	1112.79	12.8412	95.2034
-AOS 209 BIAS Spot 73	199.574	159686	1.46438	13.0339	0.595793	1.98603	0.980596	0.187824	0.778844	0.794256	1109.58	7.93903	1110.77	6.62244	1113.1	11.8825	1113.1	11.8825	99.6829
-AOS 209 BIAS Spot 107	211.696	1.23391e+06	3.19474	12.8882	0.77842	2.03066	1.67985	0.189897	1.4886	0.886155	1120.82	15.3146	1125.84	11.4292	1135.55	15.4724	1135.55	15.4724	98.7023
-AOS 209 BIAS Spot 17	32.4588	30465.2	316941	12.8029	0.801131	1.91969	1.42379	0.178331	1.17702	0.82668	1057.85	11.4832	1087.96	9.50571	1148.75	15.9113	1148.75	15.9113	92.0876
-AOS 209 BIAS Spot 68	112.381	131511	4.81863	12.8015	0.587932	2.0695	1.04025	0.192227	0.858164	0.824963	1133.43	8.91957	1138.77	7.12148	1148.97	11.668	1148.97	11.668	98.647
-AOS 209 BIAS Spot 13	268.023	212051	2.14004	12.7614	0.71526	1.99035	1.99035	0.184297	1.85739	0.933198	1090.41	18.6329	1112.24	13.4522	1155.16	14.1931	1155.16	14.1931	94.3943
-AOS 209 BIAS Spot 37	170.795	139001	3.61483	12.7165	0.607833	2.13193	0.973571	0.19671	0.760513	0.781158	1157.62	8.05864	1159.21	6.72921	1162.16	12.067	1162.16	12.067	99.6091
-AOS 209 BIAS Spot 74	70.7521	297841	2.86729	12.6607	0.815	2.14019	1.22938	0.196606	0.920411	0.748678	1157.06	9.74869	1161.89	8.50793	1170.91	16.1538	1170.91	16.1538	98.8173
-AOS 209 BIAS Spot 25	37.9618	23592.7	2.62195	12.5742	0.79002	2.14632	1.26702	0.195822	0.99056	0.781803	1152.84	10.4567	1163.87	8.77639	1184.47	15.6101	1184.47	15.6101	97.3297
-AOS 209 BIAS Spot 123	247.69	91502.3	2.10329	12.4436	0.780521	2.13552	1.58874	0.192813	1.38379	0.871	1136.6	14.4196	1160.38	10.9874	1205.07	15.3665	1205.07	15.3665	94.3179
-AOS 209 BIAS Spot 62	46.3714	8711.45	2.74341	12.4404	1.07708	2.19704	1.47777	0.198317	1.01178	0.68467	1166.27	10.7943	1180.1	10.3119	1205.56	21.2159	1205.56	21.2159	96.741
-AOS 209 BIAS Spot 104	26.6394	17986.5	1.50767	12.4109	0.868428	2.01174	1.31094	0.181159	0.982037	0.749109	1073.3	9.70954	1119.48	8.89156	1210.22	17.1124	1210.22	17.1124	88.6869
-AOS 209 BIAS Spot 116	157.471	33098.4	1.39299	12.4043	0.646345	2.21759	1.25383	0.199592	1.07439	0.856891	1173.13	11.5237	1186.61	8.77464	1211.28	12.7179	1211.28	12.7179	96.8504
-AOS 209 BIAS Spot 75	222.852	46655.9	5.49852	12.3962	0.74789	2.26511	1.41882	0.203735	1.2057	0.84979	1195.36	13.155	1201.5	9.99452	1212.57	14.7166	1212.57	14.7166	98.5801
-AOS 209 BIAS Spot 114	75.7767	19018.7	0.916004	12.2307	0.751916	2.33757	1.2555	0.207445	1.00544	0.800826	1215.19	11.1355	1223.78	8.92878	1238.98	14.7575	1238.98	14.7575	98.0799
-AOS 209 BIAS Spot 41	96.8176	51138.9	2.65148	12.1749	0.793204	2.40102	1.15088	0.212104	0.833874	0.724555	1240.02	9.40651	1242.91	8.25002	1247.93	15.5111	1247.93	15.5111	99.3662
-AOS 209 BIAS Spot 52	140.76	1.76484e+06	2.32374	11.999	0.634789	2.51378	1.18	0.218856	0.994706	0.842972	1275.83	11.5138	1276.02	8.57184	1276.33	12.359	1276.33	12.359	99.9603
-AOS 209 BIAS Spot 125	141.331	909874	2.12894	11.793	0.704522	2.67021	1.22492	0.228486	1.00204	0.818044	1326.56	12.0142	1320.25	9.0491	1310.01	13.6725	1310.01	13.6725	101.263
-AOS 209 BIAS Spot 15	77.0381	35579.9	1.74593	11.7022	0.743448	2.66384	1.22266	0.226185	0.970665	0.793894	1314.47	11.5424	1318.49	9.02651	1325	14.3981	1325	14.3981	99.2058
-AOS 209 BIAS Spot 88	70.5423	332297	1.8391	11.7019	0.924209	2.59263	1.42035	0.220132	1.07853	0.759341	1282.57	12.5437	1298.56	10.408	1325.05	17.8991	1325.05	17.8991	96.7942
-AOS 209 BIAS Spot 110	185.344	58310.9	1.77708	11.6795	0.637395	2.69024	1.23562	0.227982	1.05853	0.856679	1323.92	12.6687	1325.78	9.14666	1328.77	12.3372	1328.77	12.3372	99.6349
-AOS 209 BIAS Spot 127	87.1529	171967	2.2575	11.616	0.642205	2.69106	1.02902	0.226814	0.80403	0.781352	1317.78	9.58257	1326	7.61792	1339.3	12.4113	1339.3	12.4113	98.3934
-AOS 209 BIAS Spot 42	83.7565	19721.9	3.30981	11.5496	0.702835	2.78813	1.15731	0.233651	0.919447	0.794471	1353.6	11.2259	1352.36	8.64923	1350.38	13.5639	1350.38	13.5639	100.239
-AOS 209 BIAS Spot 81	126.548	63620.5	3.62632	10.8281	0.663386	2.8803	3.08369	0.226296	3.01149	0.976586	1315.06	35.825	1376.77	23.2461	1473.8	12.5873	1473.8	12.5873	89.2293
-AOS 209 BIAS Spot 91	228.143	180096	2.28647	10.7582	0.716764	3.33375	0.992545	0.260231	0.686582	0.691739	1491.03	9.13945	1488.99	7.75278	1486.08	13.5778	1486.08	13.5778	100.333
-AOS 209 BIAS Spot 11	66.5158	45880.5	0.928437	10.7448	0.764355	3.4508	1.21859	0.269033	0.949066	0.778822	1535.89	12.9702	1516.05	9.59362	1488.44	14.4748	1488.44	14.4748	103.188
-AOS 209 BIAS Spot 59	80.3252	44481.7	1.92016	10.6383	0.751626	3.27281	1.35611	0.252628	1.12876	0.83235	1452.02	14.6751	1474.61	10.5475	1507.27	14.1964	1507.27	14.1964	96.3341
-AOS 209 BIAS Spot 50	48.1538	475241	1.57232	10.2087	0.616625	3.64651	0.884704	0.270107	0.634408	0.717086	1541.34	8.69726	1559.75	7.04994	1584.74	11.528	1584.74	11.528	97.2618
-AOS 209 BIAS Spot 21	96.1658	71059.4	1.42541	9.81796	0.446777	4.21138	0.990269	0.300009	0.883755	0.892439	1691.35	13.1473	1676.24	8.12576	1657.36	8.27406	1657.36	8.27406	102.051
-AOS 209 BIAS Spot 2	195.747	35595.1	1.90478	9.81394	0.545463	3.89996	1.20018	0.27771	1.06907	0.890755	1579.82	14.979	1613.67	9.69969	1658.12	10.1011	1658.12	10.1011	95.2777
-AOS 209 BIAS Spot 96	209.123	93746.8	1.22679	9.71223	0.64632	4.30251	1.34137	0.3032	1.1754	0.876263	1707.16	17.6288	1693.84	11.0519	1677.39	11.9415	1677.39	11.9415	101.775
-AOS 209 BIAS Spot 8	112.226	14880.8	2.03056	9.70353	0.49464	3.94841	1.07571	0.277997	0.955245	0.88801	1581.27	13.395	1623.66	8.71554	1679.04	9.1371	1679.04	9.1371	94.1766
-AOS 209 BIAS Spot 29	84.363	105734	1.62333	9.69781	0.635808	4.20203	1.39105	0.295679	1.23724	0.88943	1669.85	18.201	1674.42	11.4097	1680.13	11.7432	1680.13	11.7432	99.3877
-AOS 209 BIAS Spot 33	531.462	80441.7	2.91836	9.30701	0.765423	4.41712	1.50228	0.298289	1.29266	0.860466	1682.82	19.1456	1715.55	12.4386	1755.73	14.0018	1755.73	14.0018	95.8471
-AOS 209 BIAS Spot 120	155.317	168353	2.26753	9.30355	0.650604	4.36892	1.18573	0.294924	0.991299	0.836023	1666.09	14.5542	1706.48	9.79753	1756.41	11.9019	1756.41	11.9019	94.8575
-AOS 209 BIAS Spot 76	99.9244	30813.3	1.45316	9.19998	0.717441	4.75862	1.08448	0.317655	0.813252	0.749899	1778.27	12.6386	1777.63	9.09968	1776.86	13.0895	1776.86	13.0895	100.079
-AOS 209 BIAS Spot 129	89.4795	31796.8	2.55482	9.14863	0.79933	4.83243	1.32819	0.320781	1.06073	0.798632	1793.54	16.6075	1790.56	11.1744	1787.07	14.5654	1787.07	14.5654	100.362
-AOS 209 BIAS Spot 82	96.4779	353416	3.77022	9.11238	0.543549	4.75523	1.00879	0.314407	0.849825	0.842424	1762.35	13.1042	1777.03	8.46345	1794.3	9.89692	1794.3	9.89692	98.2197
-AOS 209 BIAS Spot 45	92.6579	51508.3	1.14795	9.0317	0.582458	4.88975	0.922762	0.320438	0.715705	0.775611	1791.87	11.1964	1800.49	7.7789	1810.48	10.5824	1810.48	10.5824	98.9721
-AOS 209 BIAS Spot 48	50.1508	17940.7	1.09546	8.99206	0.775709	4.96071	1.17811	0.323661	0.886689	0.752637	1807.58	13.9767	1812.65	9.95578	1818.46	14.0805	1818.46	14.0805	99.4018
-AOS 209 BIAS Spot 70	58.1224	19477.6	2.85028	8.90094	0.701021	5.34106	1.14107	0.344946	0.900345	0.789033	1910.42	14.8859	1875.46	9.75939	1836.93	12.6978	1836.93	12.6978	104.001
-AOS 209 BIAS Spot 58	56.3143	57296.5	1.4248	8.88027	0.698914	5.24093	1.02239	0.337694	0.746195	0.729851	1875.56	12.1433	1859.3	8.71802	1841.14	12.6532	1841.14	12.6532	101.87
-AOS 209 BIAS Spot 32	46.6699	278646	4.08001	8.81548	0.811232	5.43656	1.26108	0.347743	0.965524	0.76563	1923.81	16.0595	1890.64	10.8159	1854.38	14.6612	1854.38	14.6612	103.744
-AOS 209 BIAS Spot 98	105.434	286421	1.54697	8.73846	0.840297	5.32548	1.23282	0.337662	0.902079	0.73172	1875.41	14.6791	1872.96	10.5393	1870.23	15.1595	1870.23	15.1595	100.277
-AOS 209 BIAS Spot 112	259.283	79800.2	2.60562	8.69424	0.623372	5.18389	1.42647	0.32702	1.28306	0.89946	1823.92	20.3827	1849.97	12.1425	1879.38	11.2316	1879.38	11.2316	97.0493
-AOS 209 BIAS Spot 1	25.8572	11590.2	0.728293	8.61657	0.700306	5.58657	1.16817	0.349275	0.934981	0.800382	1931.14	15.6023	1914.03	10.0609	1895.53	12.5937	1895.53	12.5937	101.878
-AOS 209 BIAS Spot 54	52.2442	39189.3	1.82878	8.61269	0.785538	5.51765	1.27775	0.344811	1.00775	0.788696	1909.77	16.6568	1903.35	10.9838	1896.34	14.1254	1896.34	14.1254	100.708
-AOS 209 BIAS Spot 80	34.6174	19935.5	1.66104	8.50168	0.894139	5.51399	1.38658	0.340141	1.05978	0.764309	1887.35	17.3398	1902.78	11.9183	1919.64	16.034	1919.64	16.034	98.3179
-AOS 209 BIAS Spot 18	48.026	842469	0.781928	8.46747	0.68283	5.60804	1.30627	0.34455	1.11359	0.852497	1908.52	18.3959	1917.33	11.2569	1926.87	12.2336	1926.87	12.2336	99.048
-AOS 209 BIAS Spot 44	28.4326	29304.3	0.749566	8.43787	0.73454	5.78351	1.16352	0.354088	0.902347	0.775532	1954.09	15.211	1943.94	10.0729	1933.13	13.1505	1933.13	13.1505	101.084
-AOS 209 BIAS Spot 84	123.469	161649	0.978055	8.26999	0.694247	6.05758	1.21716	0.36349	0.999756	0.821381	1998.69	17.1812	1984.16	10.6081	1969.04	12.3766	1969.04	12.3766	101.506
-AOS 209 BIAS Spot 63	43.9728	19548.8	1.76834	8.21685	0.938539	6.07754	1.31322	0.362344	0.918534	0.699449	1993.28	15.7488	1987.03	11.4507	1980.52	16.7122	1980.52	16.7122	100.644
-AOS 209 BIAS Spot 102	89.6263	2467.29	1.71963	7.95003	4.43964	5.06253	4.53684	0.292028	0.93408	0.205888	1651.65	13.6099	1829.85	38.4862	2039.1	78.5498	2039.1	78.5498	80.9994
-AOS 209 BIAS Spot 126	40.1488	31777.3	0.752834	7.84542	0.759515	6.68371	1.23149	0.380471	0.96938	0.787162	2078.48	17.2229	2070.47	10.8773	2062.49	13.395	2062.49	13.395	100.775
-AOS 209 BIAS Spot 31	78.2733	23126	1.42326	7.77131	0.582785	6.7653	1.22414	0.381478	1.07652	0.879404	2083.18	19.1631	2081.2	10.8295	2079.21	10.2581	2079.21	10.2581	100.191
-AOS 209 BIAS Spot 105	30.3204	633864	1.78702	6.75448	0.686864	8.85768	1.33931	0.43411	1.14977	0.858479	2324.22	22.4361	2323.45	12.2202	2322.76	11.7754	2322.76	11.7754	100.063
-AOS 209 BIAS Spot 24	62.8073	17271.7	1.50605	5.87505	0.717016	10.1265	1.36273	0.431676	1.15884	0.850384	2313.27	22.5246	2446.39	12.5939	2558.98	11.9983	2558.98	11.9983	90.3982
-AOS 209 BIAS Spot 89	160.68	9524.77	4.93196	5.57186	0.856104	10.4363	1.35805	0.421923	1.05422	0.776275	2269.2	20.1654	2474.27	12.5843	2647.27	14.2048	2647.27	14.2048	85.7186
-AOS 209 BIAS Spot 65	62.9432	39138.4	1.12798	5.51783	0.639562	13.3652	1.05459	0.535096	0.838522	0.795117	2762.89	18.8421	2705.8	9.96302	2663.43	10.5978	2663.43	10.5978	103.734
-AOS 209 BIAS Spot 14	48.288	23733.1	0.714826	5.47732	0.584377	12.802	1.09327	0.508782	0.923988	0.845156	2651.43	20.0859	2665.19	10.297	2675.63	9.67205	2675.63	9.67205	99.0953
-AOS 209 BIAS Spot 40	53.4845	27932.5	1.95659	5.42379	0.881705	13.2774	1.27891	0.522521	0.9264	0.724365	2709.86	20.4955	2699.58	12.0769	2691.87	14.568	2691.87	14.568	100.668
-AOS 209 BIAS Spot 9	92.024	788476	0.927275	5.31296	0.704068	13.7869	1.38298	0.531487	1.19034	0.86071	2747.72	26.6301	2735.18	13.0936	2725.93	11.595	2725.93	11.595	100.799
-AOS 209 BIAS Spot 86	54.077	81044.6	1.26923	5.27388	0.7231	13.537	1.35801	0.518012	1.14949	0.84645	2690.74	25.2866	2717.87	12.8412	2738.08	11.8954	2738.08	11.8954	98.2711
-AOS 209 BIAS Spot 7	212.335	125608	1.06754	5.15271	0.772803	12.2567	1.34987	0.458244	1.10676	0.819902	2431.8	22.4202	2624.26	12.6731	2776.26	12.6685	2776.26	12.6685	87.5926
-AOS 209 BIAS Spot 28	72.9262	22365.3	0.862907	4.93307	0.486843	12.2505	1.06867	0.438489	0.951332	0.890204	2343.87	18.6941	2623.79	10.0325	2847.45	7.93199	2847.45	7.93199	82.3149
-AOS 209 BIAS Spot 93	78.8562	182036	0.94675	4.82223	0.657775	14.3323	1.46726	0.501478	1.31155	0.893882	2620.14	28.2384	2771.96	13.9275	2884.4	10.678	2884.4	10.678	90.8383
-AOS 209 BIAS Spot 69	112.486	153698	1.79823	4.20099	0.767497	20.2735	1.49768	0.617971	1.28607	0.858712	3101.84	31.6654	3104.5	14.4933	3106.2	12.2264	3106.2	12.2264	99.8597
-AOS 209 BIAS Spot 57	77.1878	289013	2.01747	3.36716	0.692236	28.2896	1.07606	0.69116	0.823847	0.765611	3387.04	21.705	3429.19	10.5535	3453.9	10.731	3453.9	10.731	98.0643
-AOS 209 BIAS Spot 111	186.365	233982	1.5601	3.14215	0.580206	32.9068	1.20664	0.750241	1.05799	0.876806	3608.4	29.2351	3577.82	11.8912	3560.74	8.92401	3560.74	8.92401	101.339
AOS-210 BIAS
							Isotope ratios						Apparent ages (Ma)
Analysis	U	206Pb	U/Th	206Pb*	±	207Pb*	±	206Pb*	±	error	206Pb*	±	207Pb*	±	206Pb*	±	Best age	±	Conc
	(ppm)	204Pb		207Pb*	(%)	235U*	(%)	238U	(%)	corr.	238U*	(Ma)	235U	(Ma)	207Pb*	(Ma)	(Ma)	(Ma)	(%)
-AOS 210 BIAS Spot 125	445.427	41097.4	2.01592	18.8688	1.00822	0.192635	1.43186	0.0263734	1.01672	0.710067	167.811	1.68414	178.875	2.34833	327.704	22.8939	167.811	1.68414	NA
-AOS 210 BIAS Spot 121	253.577	6381.53	3.57889	18.3505	2.36133	0.375647	2.67662	0.0500167	1.26032	0.470862	314.624	3.87005	323.83	7.42159	390.544	53.0024	314.624	3.87005	NA
-AOS 210 BIAS Spot 77	581.649	2368.93	2.84002	13.9431	4.0568	0.594807	4.17323	0.0601761	0.978892	0.234564	376.696	3.58178	473.933	15.8054	977.096	82.7274	376.696	3.58178	NA
-AOS 210 BIAS Spot 49	427.87	29975.7	1.93244	17.1793	1.85142	0.528935	2.19539	0.0659317	1.17981	0.537405	411.599	4.70431	431.102	7.71191	536.727	40.5271	411.599	4.70431	76.6868
-AOS 210 BIAS Spot 107	134.957	9519.11	1.87934	18.2607	1.10558	0.513495	1.53181	0.0680365	1.06025	0.692154	424.315	4.35392	420.796	5.27707	401.535	24.7655	424.315	4.35392	105.673
-AOS 210 BIAS Spot 118	263.382	30935.9	1.0827	18.1323	0.921126	0.522736	1.472	0.0687737	1.14818	0.780012	428.763	4.76282	426.978	5.13097	417.33	20.5766	428.763	4.76282	102.74
-AOS 210 BIAS Spot 39	345.35	30048.4	2.83214	18.1214	0.658315	0.524349	1.17077	0.0689447	0.968155	0.826939	429.795	4.0254	428.052	4.08921	418.661	14.7022	429.795	4.0254	102.659
-AOS 210 BIAS Spot 59	229.228	187284	2.28781	17.9117	0.606174	0.556032	1.17994	0.0722646	1.01233	0.85795	449.785	4.39808	448.941	4.28127	444.597	13.4878	449.785	4.39808	101.167
-AOS 210 BIAS Spot 68	557.636	220535	2.39901	17.4819	0.513684	0.573283	1.11806	0.0727188	0.993071	0.888208	452.515	4.3397	460.136	4.13676	498.346	11.3222	452.515	4.3397	90.8034
-AOS 210 BIAS Spot 110	305.589	31911.9	2.00102	17.8006	0.702242	0.571706	1.23792	0.0738408	1.01946	0.823529	459.254	4.51905	459.117	4.57223	458.455	15.5827	459.254	4.51905	100.174
-AOS 210 BIAS Spot 13	253.267	241431	3.88157	17.6546	0.61374	0.579345	1.18748	0.0742133	1.01658	0.856081	461.49	4.52743	464.04	4.42303	476.661	13.5485	461.49	4.52743	96.8173
-AOS 210 BIAS Spot 12	102.157	5931.01	7.07925	18.1493	0.825591	0.584017	1.14637	0.0769085	0.795339	0.693789	477.643	3.66156	467.04	4.29164	415.226	18.4496	477.643	3.66156	115.032
-AOS 210 BIAS Spot 71	88.1252	3725.55	1.65653	18.6629	1.15395	0.577129	1.47171	0.078152	0.913421	0.620653	485.083	4.26825	462.615	5.46842	352.568	26.0614	485.083	4.26825	137.586
-AOS 210 BIAS Spot 37	408.871	75073.2	4.6558	16.6406	0.566465	0.750551	1.32848	0.0906228	1.20166	0.904535	559.22	6.4367	568.544	5.78358	605.995	12.2353	559.22	6.4367	92.2813
-AOS 210 BIAS Spot 80	75.9599	11580.1	1.48373	15.3906	1.82726	0.918816	2.2907	0.102606	1.38145	0.603072	629.661	8.28717	661.733	11.1381	772.584	38.4576	629.661	8.28717	81.5007
-AOS 210 BIAS Spot 115	195.108	108638	2.69233	16.1481	0.57979	0.917233	1.30121	0.10747	1.1649	0.895244	658.039	7.28726	660.896	6.32105	670.633	12.4073	658.039	7.28726	98.1221
-AOS 210 BIAS Spot 32	378.374	25780.1	7.90539	15.1607	0.63767	1.17298	1.00614	0.129033	0.778264	0.773515	782.344	5.73375	788.039	5.51478	804.171	13.3716	782.344	5.73375	97.2858
-AOS 210 BIAS Spot 2	230	31869.1	5.73281	13.9465	0.659466	1.58432	1.23085	0.160323	1.03928	0.844357	958.572	9.25692	964.07	7.66196	976.635	13.432	976.635	13.432	98.1505
-AOS 210 BIAS Spot 35	89.8827	37719.2	1.38998	13.8628	0.611201	1.69712	1.19394	0.170707	1.02564	0.859034	1016.01	9.64089	1007.45	7.62842	988.899	12.4246	988.899	12.4246	102.741
-AOS 210 BIAS Spot 119	38.239	13593.8	0.80017	13.7945	1.10563	1.69093	1.5954	0.169247	1.15017	0.720929	1007.96	10.7324	1005.12	10.1798	998.901	22.4574	998.901	22.4574	100.907
-AOS 210 BIAS Spot 91	615.138	116763	4.49444	13.7863	0.495379	1.68711	1.08252	0.168764	0.962528	0.889151	1005.3	8.95952	1003.67	6.90132	1000.1	10.0482	1000.1	10.0482	100.519
-AOS 210 BIAS Spot 0	75.968	13928.2	1.93609	13.7854	0.758705	1.71832	1.30899	0.171875	1.06668	0.814892	1022.43	10.0852	1015.4	8.40192	1000.24	15.3923	1000.24	15.3923	102.219
-AOS 210 BIAS Spot 112	342.916	224461	9.89873	13.759	0.524498	1.69001	1.17918	0.168719	1.05611	0.89563	1005.05	9.82834	1004.77	7.52233	1004.13	10.6347	1004.13	10.6347	100.091
-AOS 210 BIAS Spot 124	78.5661	16424.9	4.16828	13.7588	0.904495	1.71916	1.23952	0.171627	0.847523	0.683752	1021.07	8.00325	1015.71	7.95745	1004.16	18.3582	1004.16	18.3582	101.684
-AOS 210 BIAS Spot 6	147.24	36972.1	3.44668	13.7493	0.71581	1.70205	1.10141	0.169801	0.837094	0.760018	1011.01	7.83287	1009.3	7.04475	1005.57	14.523	1005.57	14.523	100.542
-AOS 210 BIAS Spot 7	112.012	35088.4	3.55019	13.7354	0.695629	1.73286	1.04135	0.1727	0.774929	0.744157	1026.97	7.35674	1020.81	6.70471	1007.62	14.1057	1007.62	14.1057	101.92
-AOS 210 BIAS Spot 95	108.937	30799.9	3.25207	13.7327	0.714369	1.76126	1.18452	0.175497	0.944868	0.797677	1042.32	9.09362	1031.31	7.67182	1008.01	14.4865	1008.01	14.4865	103.404
-AOS 210 BIAS Spot 101	70.112	20672.4	1.41488	13.6522	0.868894	1.68836	1.29717	0.167246	0.96316	0.742508	996.919	8.89631	1004.14	8.27207	1019.93	17.5929	1019.93	17.5929	97.744
-AOS 210 BIAS Spot 74	513.263	161163	5.95155	13.635	0.633675	1.68361	1.48654	0.166566	1.34472	0.904594	993.162	12.3773	1002.35	9.46984	1022.48	12.8249	1022.48	12.8249	97.1327
-AOS 210 BIAS Spot 43	54.9438	11152.4	1.50862	13.63	0.816227	1.73152	1.15336	0.171243	0.814876	0.706521	1018.95	7.68024	1020.32	7.42382	1023.22	16.5175	1023.22	16.5175	99.5831
-AOS 210 BIAS Spot 78	508.932	163634	4.25883	13.6254	0.562177	1.71404	1.10471	0.169456	0.950967	0.860831	1009.12	8.88296	1013.8	7.08418	1023.91	11.3746	1023.91	11.3746	98.5553
-AOS 210 BIAS Spot 28	44.1934	10895.7	1.88366	13.6156	0.970657	1.8294	1.38943	0.180731	0.994148	0.71551	1070.97	9.80961	1056.06	9.12203	1025.36	19.6559	1025.36	19.6559	104.447
-AOS 210 BIAS Spot 20	86.2219	8976.77	2.39222	13.5541	0.770798	1.82528	1.24936	0.17951	0.98325	0.787001	1064.3	9.64648	1054.58	8.19588	1034.51	15.5914	1034.51	15.5914	102.879
-AOS 210 BIAS Spot 100	198.236	37621.9	2.35937	13.4755	0.554897	1.81396	0.981514	0.177362	0.809605	0.824853	1052.55	7.86215	1050.51	6.42454	1046.29	11.2103	1046.29	11.2103	100.598
-AOS 210 BIAS Spot 42	457.307	217858	10.1098	13.4695	0.54613	1.79137	1.07217	0.175075	0.922656	0.860549	1040.02	8.86172	1042.32	6.98665	1047.19	11.0306	1047.19	11.0306	99.3152
-AOS 210 BIAS Spot 81	219.718	24915.2	3.82289	13.4658	0.665379	1.63972	2.34598	0.16021	2.24964	0.958935	957.945	20.0256	985.606	14.7978	1047.74	13.4353	1047.74	13.4353	91.4294
-AOS 210 BIAS Spot 10	305.379	31057.1	3.90463	13.4421	0.549858	1.77861	1.12257	0.173474	0.978683	0.871823	1031.23	9.32657	1037.67	7.29632	1051.29	11.0991	1051.29	11.0991	98.091
-AOS 210 BIAS Spot 45	462.61	70784.9	4.13684	13.4411	0.590022	1.80215	1.10091	0.175757	0.929455	0.844257	1043.75	8.95656	1046.24	7.18936	1051.45	11.9085	1051.45	11.9085	99.2677			Rejected Analyses
-AOS 210 BIAS Spot 15	157.498	34316.5	5.84572	13.437	0.623683	1.86375	1.34287	0.181709	1.18925	0.885605	1076.3	11.7885	1068.32	8.87418	1052.06	12.5857	1052.06	12.5857	102.304			206Pb/238U age	± (Ma)	206Pb/207Pb age	± (Ma)
-AOS 210 BIAS Spot 29	219.268	561669	4.02229	13.3776	0.533983	1.80389	1.09888	0.175096	0.960415	0.873995	1040.13	9.22529	1046.87	7.17854	1060.99	10.7443	1060.99	10.7443	98.0341			1031.91	12.6059	1338.78	14.1357
-AOS 210 BIAS Spot 58	531.857	104152	2.87023	13.3649	0.579879	1.84913	1.19077	0.179317	1.04004	0.873415	1063.24	10.1944	1063.12	7.84735	1062.88	11.6648	1062.88	11.6648	100.034			1077.71	17.129	2177.17	75.7289
-AOS 210 BIAS Spot 33	469.613	141107	3.10697	13.3628	0.731734	1.81797	1.26457	0.176268	1.03136	0.815581	1046.56	9.96314	1051.95	8.28387	1063.2	14.7006	1063.2	14.7006	98.4344			1126.04	7.87422	1034.4	11.3821
-AOS 210 BIAS Spot 50	476.041	54147.5	3.45002	13.3273	0.483434	1.79369	1.14608	0.173451	1.03913	0.906682	1031.09	9.90145	1043.17	7.47173	1068.56	9.7166	1068.56	9.7166	96.4939			1448.25	59.5467	1037.25	38.266
-AOS 210 BIAS Spot 63	92.0129	28021.9	1.47528	13.3222	1.25845	1.95549	3.85032	0.189024	3.63886	0.945079	1116.09	37.2919	1100.33	25.873	1069.33	25.2808	1069.33	25.2808	104.372			2232.84	14.7234	2807	11.146
-AOS 210 BIAS Spot 19	225.286	33235.1	1.04587	13.2854	0.591505	1.84657	1.5018	0.178003	1.38041	0.919169	1056.06	13.4464	1062.21	9.89236	1074.89	11.8579	1074.89	11.8579	98.2481		Total	5
-AOS 210 BIAS Spot 57	32.8425	14550.7	1.51435	13.2777	0.990199	1.88115	1.26004	0.181231	0.779232	0.618419	1073.7	7.70697	1074.47	8.35374	1076.03	19.8617	1076.03	19.8617	99.7832
-AOS 210 BIAS Spot 53	112.288	34181	1.60836	13.2641	0.67904	1.8796	0.986941	0.180896	0.71621	0.725687	1071.87	7.07256	1073.92	6.54124	1078.11	13.6283	1078.11	13.6283	99.4212
-AOS 210 BIAS Spot 8	89.5169	112506	2.59165	13.258	0.84675	1.78414	1.29551	0.171631	0.980489	0.756837	1021.09	9.25905	1039.69	8.42982	1078.98	16.9928	1078.98	16.9928	94.6347
-AOS 210 BIAS Spot 89	271.615	42052.8	2.45225	13.1936	0.755199	1.86606	1.23561	0.178639	0.977955	0.791478	1059.54	9.55506	1069.13	8.16882	1088.75	15.1243	1088.75	15.1243	97.3168
-AOS 210 BIAS Spot 84	80.5639	13264.6	2.40344	13.1906	0.636586	1.98375	1.04356	0.189862	0.826911	0.792392	1120.63	8.50589	1110	7.04499	1089.21	12.7524	1089.21	12.7524	102.885
-AOS 210 BIAS Spot 94	192.321	30963.4	1.50028	13.1613	0.697002	1.85724	1.38864	0.17736	1.20104	0.864907	1052.54	11.6634	1066.01	9.16541	1093.67	13.9434	1093.67	13.9434	96.2391
-AOS 210 BIAS Spot 129	242.372	36983.7	2.5295	13.1511	0.470628	1.93476	1.11768	0.184619	1.01376	0.907025	1092.16	10.1848	1093.19	7.48184	1095.22	9.42379	1095.22	9.42379	99.7207
-AOS 210 BIAS Spot 16	129.548	56035.7	5.15154	13.1485	0.755359	1.85723	1.29611	0.177187	1.05325	0.812623	1051.59	10.2196	1066	8.55465	1095.6	15.1143	1095.6	15.1143	95.9826
-AOS 210 BIAS Spot 54	206.653	26604.5	49.359	13.0998	0.511231	1.93658	0.741311	0.184073	0.536828	0.724161	1089.19	5.37979	1093.82	4.96395	1103.07	10.2035	1103.07	10.2035	98.7419
-AOS 210 BIAS Spot 76	192.337	62138.2	0.905818	13.0717	0.561877	1.92649	0.918389	0.18272	0.726452	0.791007	1081.82	7.23487	1090.32	6.13877	1107.32	11.2288	1107.32	11.2288	97.6967
-AOS 210 BIAS Spot 1	309.458	289470	9.27088	12.8865	0.6588	2.0023	1.28299	0.187219	1.10093	0.858097	1106.29	11.1917	1116.29	8.68837	1135.82	13.1198	1135.82	13.1198	97.4001
-AOS 210 BIAS Spot 67	43.6016	10134.1	1.92121	12.864	1.08495	2.10956	1.38446	0.196906	0.860004	0.621185	1158.68	9.12047	1151.93	9.53709	1139.29	21.5603	1139.29	21.5603	101.702
-AOS 210 BIAS Spot 98	55.8274	38105	2.97331	12.8337	0.918385	2.03095	1.41094	0.189121	1.07113	0.759159	1116.61	10.9818	1125.93	9.59998	1143.96	18.235	1143.96	18.235	97.6095
-AOS 210 BIAS Spot 4	118.446	34372.1	3.48643	12.8065	0.641181	2.03754	0.851538	0.189331	0.56036	0.658056	1117.75	5.7505	1128.14	5.79993	1148.19	12.717	1148.19	12.717	97.349
-AOS 210 BIAS Spot 3	870.229	255465	2.71008	12.7382	0.496066	2.16449	1.01927	0.200056	0.890412	0.873577	1175.62	9.56883	1169.71	7.07911	1158.78	9.83732	1158.78	9.83732	101.453
-AOS 210 BIAS Spot 92	425.848	617821	3.98526	12.6694	0.561275	2.13502	1.09657	0.196266	0.942036	0.859076	1155.23	9.96328	1160.21	7.58289	1169.55	11.1324	1169.55	11.1324	98.7753
-AOS 210 BIAS Spot 96	29.3145	16630.5	2.17912	12.5776	1.06277	2.05646	1.42593	0.187674	0.950681	0.666709	1108.77	9.68415	1134.45	9.7419	1183.94	21.0197	1183.94	21.0197	93.6506
-AOS 210 BIAS Spot 52	150.342	324482	2.05323	12.5632	0.674813	2.16856	0.98837	0.197678	0.722152	0.730649	1162.84	7.68362	1171.02	6.86856	1186.19	13.3225	1186.19	13.3225	98.0308
-AOS 210 BIAS Spot 87	95.9117	83585.3	2.28372	12.4067	0.707029	2.24584	1.17737	0.202173	0.941443	0.799614	1186.98	10.2063	1195.49	8.27189	1210.88	13.9159	1210.88	13.9159	98.027
-AOS 210 BIAS Spot 127	59.8365	16930.1	2.01445	12.3949	0.918869	2.34518	1.22711	0.210914	0.81331	0.662786	1233.68	9.132	1226.09	8.73534	1212.79	18.0802	1212.79	18.0802	101.723
-AOS 210 BIAS Spot 90	275.845	39161.1	3.73663	12.3258	0.642282	2.38006	1.18223	0.212858	0.992541	0.839551	1244.03	11.2292	1236.63	8.45288	1223.74	12.627	1223.74	12.627	101.658
-AOS 210 BIAS Spot 82	571.86	78351.5	2.51659	12.1558	0.577556	2.27078	1.34749	0.200284	1.21744	0.903487	1176.85	13.0958	1203.26	9.49933	1250.96	11.2949	1250.96	11.2949	94.0753
-AOS 210 BIAS Spot 116	191.136	61986.6	4.2345	12.0796	0.764533	2.5093	1.30374	0.219935	1.05604	0.810011	1281.53	12.2732	1274.73	9.46598	1263.26	14.9215	1263.26	14.9215	101.446
-AOS 210 BIAS Spot 128	391.009	77212.1	5.91651	12.0684	0.598711	2.40338	1.24203	0.210455	1.0882	0.876148	1231.24	12.1966	1243.61	8.90605	1265.11	11.6751	1265.11	11.6751	97.323
-AOS 210 BIAS Spot 34	204.83	640164	3.21003	11.8651	0.587891	2.57936	1.21395	0.222061	1.0621	0.874913	1292.76	12.4413	1294.8	8.88277	1298.17	11.4276	1298.17	11.4276	99.5829
-AOS 210 BIAS Spot 65	151.463	134618	1.64587	11.6619	0.649467	2.50811	1.03126	0.212229	0.801057	0.776774	1240.68	9.04069	1274.38	7.48652	1331.68	12.5659	1331.68	12.5659	93.1669
-AOS 210 BIAS Spot 30	73.2083	27623.5	1.73281	11.448	0.683871	2.81504	1.15077	0.233831	0.925523	0.804264	1354.55	11.3071	1359.55	8.62213	1367.4	13.166	1367.4	13.166	99.0598
-AOS 210 BIAS Spot 102	81.6526	58063.5	3.25048	11.4381	0.851493	2.85424	1.30623	0.236882	0.990557	0.758331	1370.47	12.2293	1369.93	9.82236	1369.07	16.3891	1369.07	16.3891	100.102
-AOS 210 BIAS Spot 69	257.388	9.46401e+06	2.51567	11.3084	0.518712	2.94346	1.55339	0.241515	1.46423	0.942601	1394.57	18.3621	1393.16	11.7737	1390.99	9.9531	1390.99	9.9531	100.257
-AOS 210 BIAS Spot 48	21.5054	4743.93	1.4378	11.246	0.935791	3.12043	1.34723	0.254624	0.969193	0.719395	1462.28	12.6799	1437.74	10.36	1401.59	17.9304	1401.59	17.9304	104.33
-AOS 210 BIAS Spot 83	53.4785	13794	0.973984	11.2421	0.729511	3.06893	1.22931	0.250335	0.989457	0.804886	1440.2	12.7706	1424.97	9.41482	1402.26	13.9765	1402.26	13.9765	102.706
-AOS 210 BIAS Spot 5	82.5847	361273	3.32077	11.098	0.589814	3.04568	1.02252	0.245254	0.835269	0.81687	1413.96	10.6048	1419.15	7.81636	1426.93	11.2623	1426.93	11.2623	99.0905
-AOS 210 BIAS Spot 88	396.224	88022.8	1.91234	11.0566	0.488613	2.98664	1.15111	0.239604	1.04226	0.905441	1384.64	12.9869	1404.22	8.75654	1434.06	9.32084	1434.06	9.32084	96.5536
-AOS 210 BIAS Spot 93	185.314	1.18561e+06	1.86968	10.9311	0.679966	3.09189	1.13042	0.245232	0.903049	0.798861	1413.84	11.4645	1430.68	8.67323	1455.81	12.9332	1455.81	12.9332	97.1173
-AOS 210 BIAS Spot 126	350.782	401472	2.5287	10.9307	0.56994	3.25688	1.37365	0.258308	1.24984	0.909864	1481.18	16.5396	1470.82	10.6717	1455.88	10.8403	1455.88	10.8403	101.738
-AOS 210 BIAS Spot 23	346.188	188449	4.38535	10.8679	0.490667	3.22468	1.12559	0.254284	1.01301	0.899985	1460.53	13.2391	1463.11	8.72395	1466.84	9.31875	1466.84	9.31875	99.5703
-AOS 210 BIAS Spot 47	259.451	188700	1.71276	10.8093	0.507942	3.17894	1.12307	0.249326	1.00164	0.891876	1435	12.8861	1452.06	8.67488	1477.1	9.63356	1477.1	9.63356	97.1498
-AOS 210 BIAS Spot 64	75.2062	19239.5	1.29036	10.7586	0.546399	3.3129	1.14398	0.258615	1.00505	0.878561	1482.75	13.3128	1484.1	8.92272	1486	10.3506	1486	10.3506	99.7813
-AOS 210 BIAS Spot 22	388.784	505317	1.55378	9.97642	0.511202	3.73426	1.10631	0.270313	0.981121	0.886839	1542.39	13.4585	1578.74	8.86076	1627.65	9.50372	1627.65	9.50372	94.762
-AOS 210 BIAS Spot 123	202.181	25427.6	7.5777	9.90768	0.695884	4.08164	0.986994	0.293423	0.699931	0.709154	1658.61	10.2359	1650.64	8.04979	1640.49	12.9181	1640.49	12.9181	101.105
-AOS 210 BIAS Spot 103	171.009	47442	2.91034	9.8734	0.708415	3.86095	1.2874	0.276598	1.07496	0.834988	1574.2	15.0144	1605.56	10.3832	1646.92	13.1398	1646.92	13.1398	95.5846
-AOS 210 BIAS Spot 18	529.17	191398	4.84283	9.43661	0.60319	4.44232	1.20602	0.304168	1.04434	0.865939	1711.95	15.7015	1720.27	9.99595	1730.4	11.0703	1730.4	11.0703	98.9337
-AOS 210 BIAS Spot 85	247.434	429417	1.67994	9.3948	0.580814	4.30986	1.70538	0.293791	1.60342	0.940216	1660.44	23.4716	1695.25	14.0559	1738.54	10.647	1738.54	10.647	95.5079
-AOS 210 BIAS Spot 11	219.358	213425	0.936395	9.33172	0.459961	4.34204	1.04599	0.293997	0.939431	0.898126	1661.47	13.7592	1701.38	8.63286	1750.88	8.4201	1750.88	8.4201	94.8937
-AOS 210 BIAS Spot 104	165.481	84866.8	1.34084	9.29747	0.564165	4.75585	1.21137	0.320834	1.07198	0.88493	1793.8	16.7857	1777.14	10.1634	1757.61	10.319	1757.61	10.319	102.059
-AOS 210 BIAS Spot 41	55.5329	9919.96	1.49932	9.14588	0.663964	4.88761	1.11175	0.324347	0.891706	0.802074	1810.92	14.0782	1800.12	9.37145	1787.62	12.0976	1787.62	12.0976	101.304
-AOS 210 BIAS Spot 111	185.381	56775.5	2.39638	9.0755	0.526873	4.69248	1.09187	0.309002	0.956344	0.875874	1735.79	14.553	1765.9	9.13935	1801.68	9.58456	1801.68	9.58456	96.343
-AOS 210 BIAS Spot 26	80.0608	56682.4	0.968778	9.00074	0.653643	4.85622	1.06729	0.31715	0.843718	0.790523	1775.79	13.0962	1794.69	8.98679	1816.71	11.867	1816.71	11.867	97.7476
-AOS 210 BIAS Spot 122	90.5008	51217.7	3.08954	8.91739	0.528623	5.24718	1.06715	0.339509	0.927018	0.868687	1884.31	15.1465	1860.31	9.1014	1833.59	9.579	1833.59	9.579	102.766
-AOS 210 BIAS Spot 72	212.9	298271	0.88873	8.90442	0.782128	4.74713	1.33731	0.306708	1.08475	0.811142	1724.49	16.4133	1775.6	11.2166	1836.22	14.1682	1836.22	14.1682	93.9148
-AOS 210 BIAS Spot 113	39.0938	14799.4	2.50903	8.84118	0.719673	5.25861	1.09835	0.337341	0.829725	0.755429	1873.86	13.4921	1862.17	9.37079	1849.12	13.0145	1849.12	13.0145	101.338
-AOS 210 BIAS Spot 106	173.954	1.0126e+06	4.21737	8.82479	0.60244	5.24081	0.962734	0.335576	0.750948	0.780016	1865.35	12.1633	1859.28	8.20925	1852.48	10.8897	1852.48	10.8897	100.695
-AOS 210 BIAS Spot 70	106.062	46771.5	2.38437	8.80732	0.698888	5.32537	1.01859	0.340315	0.741001	0.727476	1888.19	12.1286	1872.94	8.70771	1856.06	12.628	1856.06	12.628	101.731
-AOS 210 BIAS Spot 9	75.5925	37975	5.44184	8.73768	0.595838	5.26573	1.00724	0.333843	0.812097	0.806263	1856.98	13.1028	1863.33	8.59525	1870.39	10.749	1870.39	10.749	99.2831
-AOS 210 BIAS Spot 86	528.914	148280	6.14103	8.66541	0.64115	4.96802	1.30779	0.312363	1.13984	0.871578	1752.33	17.4891	1813.9	11.0544	1885.36	11.5437	1885.36	11.5437	92.9438
-AOS 210 BIAS Spot 44	241.524	3042.17	3.11359	8.4422	2.62659	4.66257	2.84761	0.285607	1.09996	0.386273	1619.54	15.7527	1760.55	23.8123	1932.21	47.0381	1932.21	47.0381	83.8178
-AOS 210 BIAS Spot 66	190.937	6918.46	3.30447	8.35039	0.949077	5.20031	1.35218	0.315082	0.963147	0.71229	1765.67	14.8759	1852.67	11.516	1951.77	16.9548	1951.77	16.9548	90.4648
-AOS 210 BIAS Spot 46	554.277	28498.3	2.12749	8.25253	0.699638	5.29538	1.32297	0.317082	1.12283	0.848722	1775.46	17.4259	1868.12	11.2999	1972.81	12.4673	1972.81	12.4673	89.9969
-AOS 210 BIAS Spot 109	160.456	566559	1.03643	8.14055	0.539481	6.13021	0.924189	0.36209	0.750391	0.811945	1992.07	12.8593	1994.56	8.06813	1997.12	9.58555	1997.12	9.58555	99.7474
-AOS 210 BIAS Spot 56	236.754	33590	1.67417	7.98101	0.735966	5.33925	1.79072	0.30919	1.63249	0.91164	1736.72	24.8539	1875.17	15.3155	2032.22	13.0247	2032.22	13.0247	85.4594
-AOS 210 BIAS Spot 61	97.6661	31881.9	2.2894	7.7082	0.714293	6.88482	1.41229	0.385064	1.21834	0.862669	2099.9	21.8349	2096.7	12.5221	2093.56	12.5552	2093.56	12.5552	100.303
-AOS 210 BIAS Spot 117	185.427	118187	3.30573	7.44136	1.214	6.86735	1.49386	0.370791	0.870523	0.582736	2033.12	15.1795	2094.45	13.2411	2155.26	21.1904	2155.26	21.1904	94.333
-AOS 210 BIAS Spot 40	42.5989	146888	0.862989	6.69245	0.647736	7.44762	1.81765	0.361652	1.69831	0.934349	1990	29.0779	2166.71	16.2727	2338.57	11.0835	2338.57	11.0835	85.0947
-AOS 210 BIAS Spot 79	158.276	106092	2.66742	6.43981	0.591159	9.47069	0.942684	0.44253	0.734292	0.778937	2361.96	14.5213	2384.71	8.65791	2404.19	10.0493	2404.19	10.0493	98.2433
-AOS 210 BIAS Spot 25	262.918	180367	3.4402	6.33737	0.492276	9.78211	1.06999	0.449811	0.950021	0.88788	2394.41	19.0008	2414.47	9.85715	2431.41	8.3424	2431.41	8.3424	98.4785
-AOS 210 BIAS Spot 55	203.749	82465.5	2.87725	6.09832	0.514869	10.345	1.00433	0.457752	0.862312	0.858597	2429.62	17.4554	2466.14	9.29915	2496.37	8.67105	2496.37	8.67105	97.3263
-AOS 210 BIAS Spot 38	182.645	297579	1.60809	6.05321	0.623611	9.74132	1.06516	0.427849	0.863527	0.8107	2296.02	16.6803	2410.62	9.80887	2508.87	10.4866	2508.87	10.4866	91.5161
-AOS 210 BIAS Spot 114	241.87	319652	2.67514	5.9613	0.522771	11.0246	1.04804	0.476862	0.908345	0.866711	2513.58	18.907	2525.21	9.75691	2534.56	8.77092	2534.56	8.77092	99.1724
-AOS 210 BIAS Spot 17	226.765	65974.4	1.34802	5.91569	0.530762	10.3821	0.969365	0.445633	0.811147	0.836782	2375.81	16.119	2469.45	8.97824	2547.44	8.89069	2547.44	8.89069	93.2626
-AOS 210 BIAS Spot 27	107.838	54701.5	1.13286	5.84142	0.535255	11.5235	0.951691	0.488417	0.786904	0.826848	2563.82	16.6459	2566.49	8.89193	2568.58	8.9506	2568.58	8.9506	99.8148
-AOS 210 BIAS Spot 14	195.24	88230.9	2.41984	5.82606	0.582961	11.0094	1.12738	0.4654	0.964954	0.855928	2463.36	19.7559	2523.93	10.4944	2572.98	9.74411	2572.98	9.74411	95.7393
-AOS 210 BIAS Spot 31	40.9121	70775.3	0.779996	5.82118	0.551482	11.2572	1.04266	0.475478	0.884879	0.848673	2507.54	18.3823	2544.67	9.72357	2574.38	9.21666	2574.38	9.21666	97.4034
-AOS 210 BIAS Spot 51	112.389	144006	2.59988	5.74066	0.748454	11.5191	1.26496	0.47981	1.01977	0.80617	2526.44	21.315	2566.13	11.8187	2597.63	12.4774	2597.63	12.4774	97.2593
-AOS 210 BIAS Spot 75	70.464	47349.1	13.4869	5.57987	0.792997	11.8967	1.62765	0.481656	1.42141	0.873289	2534.48	29.7873	2596.3	15.2466	2644.89	13.1603	2644.89	13.1603	95.8254
-AOS 210 BIAS Spot 36	111.189	72063.6	1.01684	5.56742	0.808915	11.0857	1.59834	0.44782	1.37853	0.862477	2385.55	27.487	2530.35	14.8875	2648.59	13.4199	2648.59	13.4199	90.0686
-AOS 210 BIAS Spot 21	70.4035	69919.1	1.04889	5.4579	0.475764	12.9725	1.09982	0.513734	0.991594	0.901595	2672.55	21.6941	2677.66	10.3685	2681.51	7.86668	2681.51	7.86668	99.6658
-AOS 210 BIAS Spot 120	69.646	191154	1.18815	5.44327	0.517726	11.2606	1.26466	0.444742	1.15383	0.912364	2371.83	22.897	2544.94	11.7943	2685.95	8.55736	2685.95	8.55736	88.3052
-AOS 210 BIAS Spot 108	92.5931	488746	7.07674	5.40822	0.480815	13.8685	1.02163	0.544217	0.901407	0.882327	2801.08	20.4788	2740.77	9.67603	2696.62	7.94259	2696.62	7.94259	103.874
-AOS 210 BIAS Spot 105	389.719	168849	3.35244	5.11275	0.474966	14.5724	1.02433	0.540598	0.907557	0.886	2785.95	20.5295	2787.74	9.73327	2789.01	7.77581	2789.01	7.77581	99.8902
-AOS 210 BIAS Spot 60	18.0734	695.868	1.28902	4.1543	3.5837	19.0769	3.91699	0.575034	1.5811	0.403652	2928.46	37.2123	3045.71	37.8089	3124	57.0362	3124	57.0362	93.7407
AOS-301 BIAS
							Isotope ratios						Apparent ages (Ma)
Analysis	U	206Pb	U/Th	206Pb*	±	207Pb*	±	206Pb*	±	error	206Pb*	±	207Pb*	±	206Pb*	±	Best age	±	Conc
	(ppm)	204Pb		207Pb*	(%)	235U*	(%)	238U	(%)	corr.	238U*	(Ma)	235U	(Ma)	207Pb*	(Ma)	(Ma)	(Ma)	(%)
-Spot 15	1301.94	37206.7	1.22414	19.9966	0.677937	0.238318	1.38041	0.0345781	1.20247	0.871096	219.137	2.59078	217.042	2.69751	194.394	15.7711	219.137	2.59078	NA
-Spot 83	308.417	23205.7	3.13495	19.5544	1.04513	0.284656	1.92781	0.040388	1.61993	0.840293	255.237	4.05387	254.345	4.33742	246.117	24.0525	255.237	4.05387	NA
-Spot 51	178.674	24305.3	2.73221	19.1354	1.03861	0.380364	1.60445	0.0528111	1.22293	0.76221	331.757	3.95452	327.306	4.48915	295.769	23.7273	331.757	3.95452	NA
-Spot 85	149.816	11534.2	0.843118	18.8982	1.26077	0.423505	1.56868	0.0580719	0.933383	0.595013	363.889	3.30239	358.554	4.73878	324.177	28.635	363.889	3.30239	NA
-Spot 24	197.042	12465	3.99644	18.5925	1.31461	0.485841	1.6944	0.0655419	1.06901	0.630907	409.241	4.23885	402.072	5.62564	361.063	29.6538	409.241	4.23885	113.344
-Spot 69	419.539	88692.4	2.15349	18.267	0.968036	0.494605	1.6239	0.0655561	1.30382	0.802897	409.327	5.17099	408.044	5.45663	400.765	21.6869	409.327	5.17099	102.136
-Spot 64	181.166	10743.5	1.77877	18.4776	1.25395	0.491205	1.8004	0.0658562	1.29191	0.71757	411.142	5.14575	405.732	6.02183	375.027	28.2111	411.142	5.14575	109.63
-Spot 68	367.811	29861.8	1.08233	18.0098	0.890208	0.505231	1.71453	0.0660219	1.46532	0.854645	412.144	5.85021	415.237	5.84343	432.441	19.8337	412.144	5.85021	95.3064
-Spot 18	361.76	23447.7	2.69817	17.7321	0.938863	0.536547	1.88039	0.0690328	1.62923	0.866434	430.326	6.78213	436.146	6.66724	467.009	20.8039	430.326	6.78213	92.1452
-Spot 120	410.088	508172	1.26928	18.1168	0.816688	0.525865	1.41688	0.0691265	1.15783	0.817169	430.891	4.8259	429.062	4.95821	419.229	18.2375	430.891	4.8259	102.782
-Spot 55	233.527	40915.7	2.04676	17.9557	0.843456	0.535956	1.31672	0.0698265	1.01111	0.767899	435.11	4.25426	435.755	4.66528	439.139	18.7787	435.11	4.25426	99.0826
-Spot 114	126.61	17819.5	1.00834	17.9235	1.09087	0.539511	1.59406	0.0701634	1.16234	0.729168	437.14	4.91261	438.102	5.67228	443.139	24.2619	437.14	4.91261	98.6462
-Spot 4	486.62	143145	2.21725	17.7369	0.825874	0.552263	1.60916	0.0710742	1.38106	0.858248	442.624	5.90775	446.478	5.81318	466.407	18.3016	442.624	5.90775	94.9009
-Spot 110	498.662	469604	1.32108	17.8957	0.746517	0.56228	1.64723	0.0730113	1.46836	0.891411	454.272	6.44074	453.01	6.01981	446.586	16.6134	454.272	6.44074	101.721
-Spot 67	99.3418	8963.36	1.97977	18.4565	1.14332	0.562803	1.55884	0.0753692	1.05962	0.679748	468.422	4.78745	453.35	5.70018	377.599	25.7187	468.422	4.78745	124.053
-Spot 89	366.847	67848.9	18.5433	17.9781	0.651628	0.579108	1.79528	0.0755426	1.67285	0.931802	469.462	7.57423	463.888	6.68523	436.368	14.5085	469.462	7.57423	107.584
-Spot 81	100.952	45909.6	1.46929	18.0036	1.0622	0.580978	1.7665	0.075894	1.41147	0.799021	471.568	6.41842	465.09	6.59148	433.209	23.6839	471.568	6.41842	108.854
-Spot 49	269.745	39902.2	1.17799	16.9155	0.928295	0.766718	1.39256	0.0941038	1.03802	0.745406	579.762	5.75537	577.878	6.13645	570.468	20.1927	579.762	5.75537	101.629
-Spot 104	244.205	49774.2	2.56272	16.4538	0.741953	0.838017	1.18945	0.100048	0.92968	0.781603	614.689	5.45064	618.051	5.50661	630.402	16.0027	614.689	5.45064	97.5074
-Spot 109	61.7013	21255.2	0.930357	16.6315	1.249	0.84401	1.77181	0.101852	1.25671	0.709278	625.25	7.48853	621.356	8.23457	607.178	27.024	625.25	7.48853	102.977
-Spot 34	93.2678	27149.8	1.43162	15.4475	0.978816	1.16812	1.54015	0.130928	1.18911	0.772074	793.159	8.87441	785.765	8.42573	764.812	20.6265	793.159	8.87441	103.706
-Spot 17	156.229	67293.3	4.56377	14.2855	0.872876	1.47739	1.32651	0.153137	0.998852	0.752995	918.524	8.55104	921.163	8.03248	927.47	17.9255	927.47	17.9255	99.0354
-Spot 80	56.522	14706.6	2.09543	14.1049	0.740763	1.58727	1.18959	0.162445	0.930809	0.782459	970.352	8.38521	965.227	7.41047	953.551	15.1333	953.551	15.1333	101.762
-Spot 44	119.032	20368	3.07594	14.0539	0.937308	1.62941	1.47365	0.166155	1.13714	0.77165	990.892	10.4445	981.63	9.27271	960.991	19.159	960.991	19.159	103.111
-Spot 31	126.315	19546	4.5516	14.0524	0.852087	1.58152	1.31822	0.161254	1.00581	0.763005	963.743	9.00361	962.966	8.20022	961.213	17.4003	961.213	17.4003	100.263
-Spot 8	76.1435	39572.9	1.72331	14.0329	0.981967	1.53253	1.50301	0.156043	1.13788	0.757068	934.751	9.90114	943.514	9.23543	964.042	20.0456	964.042	20.0456	96.9616
-Spot 91	88.9638	27905.3	1.7825	13.9789	0.803397	1.63615	1.37193	0.165953	1.11209	0.810604	989.773	10.2038	984.232	8.64623	971.887	16.4047	971.887	16.4047	101.84
-Spot 107	25.0976	12061.2	1.28718	13.8991	1.32473	1.72256	1.67093	0.17372	1.01838	0.60947	1032.58	9.71664	1016.98	10.735	983.545	26.9724	983.545	26.9724	104.985
-Spot 46	187.36	76949.4	4.02732	13.7676	0.79885	1.75185	1.53337	0.175002	1.30884	0.853571	1039.61	12.5664	1027.85	9.91204	1002.87	16.2121	1002.87	16.2121	103.664
-Spot 100	236.942	66735.9	5.66625	13.6717	0.736584	1.73539	1.25229	0.172151	1.01275	0.808722	1023.95	9.58843	1021.75	8.06718	1017.04	14.92	1017.04	14.92	100.68
-Spot 75	134.402	43469.3	2.46678	13.6654	0.777244	1.70386	1.65691	0.168945	1.4633	0.883149	1006.3	13.6334	1009.98	10.6022	1017.97	15.7412	1017.97	15.7412	98.8537
-Spot 58	68.1215	1.00777e+06	3.95783	13.6643	1.1092	1.70101	1.61402	0.168648	1.1725	0.726445	1004.66	10.9076	1008.91	10.3213	1018.14	22.4647	1018.14	22.4647	98.6757
-Spot 98	480.174	407363	3.49563	13.5681	0.820331	1.70944	1.53443	0.16829	1.29674	0.845095	1002.68	12.0415	1012.08	9.83027	1032.44	16.5966	1032.44	16.5966	97.1184
-Spot 10	163.2	61841.8	3.22655	13.5621	0.788003	1.75651	1.39174	0.172847	1.14717	0.824269	1027.78	10.8985	1029.56	9.00516	1033.33	15.9416	1033.33	15.9416	99.463
-Spot 59	40.6441	15409.4	2.57614	13.5611	1.29522	1.70544	1.69264	0.16781	1.08969	0.643783	1000.03	10.0941	1010.58	10.8345	1033.48	26.1907	1033.48	26.1907	96.7642
-Spot 35	516.598	871235	7.28008	13.5488	0.786995	1.69038	1.52884	0.166177	1.31072	0.85733	991.013	12.0402	1004.91	9.75381	1035.31	15.9164	1035.31	15.9164	95.7215
-Spot 13	319.053	194309	0.697486	13.5319	0.626812	1.78214	1.46432	0.174979	1.32339	0.903752	1039.49	12.7046	1038.96	9.5245	1037.83	12.6755	1037.83	12.6755	100.16			Rejected Analyses
-Spot 56	209.479	45683.5	3.19092	13.5237	0.921897	1.77702	1.28868	0.174372	0.900447	0.698735	1036.15	8.61881	1037.09	8.37334	1039.05	18.6317	1039.05	18.6317	99.7215			206Pb/238U age	± (Ma)	206Pb/207Pb age	± (Ma)
-Spot 118	160.064	54329.6	1.24695	13.4162	0.766637	1.76418	1.29739	0.171736	1.04665	0.806739	1021.67	9.88902	1032.39	8.40788	1055.18	15.4591	1055.18	15.4591	96.8244			937.992	10.1661	877.234	34.1463
-Spot 11	48.2269	8166.68	1.17099	13.4142	1.35702	1.7763	1.70617	0.172889	1.03417	0.606138	1028.01	9.82704	1036.83	11.0846	1055.48	27.3318	1055.48	27.3318	97.3972			965.438	10.3301	885.085	23.6646
-Spot 39	345.507	1.26701e+07	4.38434	13.3589	0.787962	1.81432	1.84629	0.175862	1.6697	0.904355	1044.33	16.0981	1050.64	12.0862	1063.79	15.8359	1063.79	15.8359	98.1703			1075.66	12.9978	997.225	35.7955
-Spot 101	117.665	83635.9	3.22875	13.3457	0.785597	1.90501	1.37067	0.18447	1.1232	0.819452	1091.35	11.2766	1082.84	9.12691	1065.78	15.7773	1065.78	15.7773	102.399			1100.11	9.66688	1029.39	17.4715
-Spot 16	96.8312	45275.4	1.59401	13.3131	0.953522	1.90495	1.47339	0.184015	1.12324	0.762353	1088.87	11.2535	1082.82	9.81084	1070.69	19.1411	1070.69	19.1411	101.697			1130.27	14.1543	1045.12	44.4989
-Spot 28	25.601	29392.4	1.71851	13.3065	1.26445	1.77145	1.70064	0.171033	1.13725	0.668721	1017.8	10.7075	1035.05	11.0377	1071.69	25.3871	1071.69	25.3871	94.9715			1627.57	19.4746	2058.7	43.4559
-Spot 20	203.25	267229	5.87418	13.2996	0.854079	1.79295	1.43219	0.173019	1.14966	0.802728	1028.72	10.9314	1042.9	9.33572	1072.74	17.1371	1072.74	17.1371	95.8966		Total	6
-Spot 74	26.1248	123664	1.92582	13.2511	1.29118	1.78582	1.64318	0.171703	1.01632	0.618509	1021.49	9.60087	1040.3	10.6959	1080.03	25.8899	1080.03	25.8899	94.5792
-Spot 19	29.5335	27396.1	1.97735	13.1824	1.15999	1.82641	1.68502	0.174695	1.22218	0.72532	1037.93	11.7168	1054.99	11.0564	1090.45	23.2392	1090.45	23.2392	95.1831
-Spot 54	272.584	376147	2.18942	13.1338	0.889312	1.91625	1.77459	0.182613	1.53567	0.865368	1081.23	15.2864	1086.76	11.8406	1097.88	17.8021	1097.88	17.8021	98.4841
-Spot 47	76.1548	36950.3	3.24709	13.1245	1.08264	1.94243	1.67489	0.184977	1.27795	0.763004	1094.1	12.86	1095.84	11.2273	1099.3	21.6708	1099.3	21.6708	99.5275
-Spot 92	913.08	194711	8.72851	13.1244	0.682731	1.86309	1.62203	0.177419	1.47135	0.907102	1052.86	14.2924	1068.08	10.7178	1099.33	13.6413	1099.33	13.6413	95.7731
-Spot 73	216.592	73107.7	3.89397	13.1159	0.917561	1.92819	1.55245	0.1835	1.25227	0.806642	1086.07	12.5166	1090.91	10.3804	1100.6	18.3543	1100.6	18.3543	98.6799
-Spot 105	151.224	155978	2.11237	12.972	0.599066	2.07359	1.07965	0.195172	0.898197	0.831936	1149.33	9.45536	1140.12	7.39599	1122.61	11.9633	1122.61	11.9633	102.38
-Spot 70	202.387	60450	2.60856	12.9571	0.805795	2.00167	1.26164	0.188186	0.970785	0.769464	1111.54	9.91161	1116.08	8.54287	1124.9	16.0781	1124.9	16.0781	98.8121
-Spot 111	147.013	73864.4	6.04019	12.9134	0.807702	2.09478	1.28245	0.196277	0.996147	0.77675	1155.29	10.5361	1147.1	8.81438	1131.63	16.0645	1131.63	16.0645	102.091
-Spot 93	140.782	49433.7	1.77183	12.8656	0.855871	2.09641	1.21967	0.195701	0.868957	0.712451	1152.19	9.16827	1147.63	8.38495	1139.01	17.005	1139.01	17.005	101.157
-Spot 12	164.354	56354.6	3.71911	12.8235	0.8429	2.11069	1.29337	0.196391	0.980977	0.758468	1155.9	10.3807	1152.3	8.91109	1145.52	16.7304	1145.52	16.7304	100.906
-Spot 95	403.099	278271	4.37218	12.8212	0.764244	2.1399	1.64505	0.199072	1.45675	0.885535	1170.33	15.5908	1161.79	11.3843	1145.88	15.1868	1145.88	15.1868	102.134
-Spot 27	62.1219	95833.2	3.36464	12.7983	0.993562	2.12267	1.53139	0.197117	1.16533	0.760961	1159.81	12.3696	1156.21	10.5703	1149.43	19.7375	1149.43	19.7375	100.903
-Spot 60	223.676	262132	3.81018	12.7702	0.874647	2.0326	1.84871	0.188338	1.62871	0.881002	1112.37	16.6403	1126.49	12.5822	1153.8	17.3592	1153.8	17.3592	96.409
-Spot 97	237.941	1.48414e+06	2.66272	12.6742	0.764626	2.15736	1.39837	0.198395	1.17081	0.837265	1166.69	12.495	1167.42	9.70206	1168.79	15.161	1168.79	15.161	99.8206
-Spot 6	31.9004	32892.6	2.91489	12.6548	1.2803	2.20867	1.77955	0.202802	1.23597	0.694539	1190.36	13.434	1183.79	12.4385	1171.84	25.3282	1171.84	25.3282	101.58
-Spot 112	142.422	53432.8	2.95837	12.6195	0.783021	2.09641	1.4503	0.191958	1.22075	0.841726	1131.97	12.6733	1147.63	9.97053	1177.36	15.4871	1177.36	15.4871	96.145
-Spot 71	435.743	366857	3.10037	12.5683	0.846012	2.15333	1.82042	0.19637	1.61189	0.88545	1155.79	17.0555	1166.13	12.6231	1185.39	16.696	1185.39	16.696	97.5027
-Spot 30	550.143	467075	2.50204	12.4897	0.708596	2.22157	1.26826	0.201326	1.05185	0.82936	1182.44	11.3635	1187.87	8.88061	1197.77	13.9553	1197.77	13.9553	98.7201
-Spot 7	229.486	822708	4.05763	12.4057	0.833312	2.18346	1.60476	0.196542	1.37144	0.854607	1156.72	14.5219	1175.78	11.1764	1211.03	16.4019	1211.03	16.4019	95.5151
-Spot 90	24.7329	25771	5.50642	12.4036	1.22118	2.29435	1.76303	0.206488	1.27161	0.721263	1210.08	14.0295	1210.55	12.4681	1211.37	24.0378	1211.37	24.0378	99.8934
-Spot 45	352.297	138936	2.38248	12.3968	0.739675	2.23048	1.57366	0.200629	1.38899	0.882648	1178.7	14.9625	1190.67	11.0329	1212.49	14.5551	1212.49	14.5551	97.2134
-Spot 86	457.979	71141.3	2.69123	12.2304	0.699113	2.41684	1.54232	0.214476	1.37477	0.891365	1252.62	15.6509	1247.62	11.0776	1239.02	13.7226	1239.02	13.7226	101.098
-Spot 52	332.951	613597	3.65816	12.1093	0.853387	2.44309	2.03897	0.214657	1.85179	0.908199	1253.58	21.0962	1255.39	14.6914	1258.47	16.6822	1258.47	16.6822	99.6117
-Spot 1	496.459	1.74427e+06	3.13794	11.8624	0.514157	2.52872	1.52813	0.217652	1.43904	0.941697	1269.46	16.5817	1280.33	11.1197	1298.62	9.99473	1298.62	9.99473	97.7546
-Spot 43	85.1094	30246.7	1.33662	11.7907	0.978022	2.61721	1.61304	0.223906	1.28272	0.795218	1302.48	15.1275	1305.48	11.8511	1310.4	18.9797	1310.4	18.9797	99.396
-Spot 23	265.548	61841.7	2.74382	11.6021	0.857667	2.7301	1.53675	0.229829	1.27515	0.829771	1333.6	15.3618	1336.69	11.4212	1341.62	16.5697	1341.62	16.5697	99.4026
-Spot 53	83.113	41826.4	1.42094	11.3671	0.740887	2.8065	1.22332	0.231474	0.973447	0.795742	1342.22	11.7953	1357.27	9.15843	1381.05	14.2356	1381.05	14.2356	97.1883
-Spot 78	99.0694	80516.9	1.31323	11.056	0.862466	2.92009	1.5206	0.23425	1.25234	0.823587	1356.74	15.3221	1387.13	11.5017	1434.18	16.4525	1434.18	16.4525	94.6002
-Spot 87	47.935	44725.8	1.66793	10.9979	0.82731	3.25281	1.44924	0.259571	1.1899	0.821049	1487.65	15.8075	1469.85	11.2557	1444.21	15.7604	1444.21	15.7604	103.008
-Spot 117	189.251	5.87328e+06	1.58088	10.9679	0.794354	3.07902	1.31376	0.245034	1.04641	0.796499	1412.81	13.276	1427.48	10.0697	1449.41	15.122	1449.41	15.122	97.4752
-Spot 57	401.618	2.2092e+06	4.19626	10.9523	0.726758	3.14291	1.46824	0.249761	1.27575	0.868901	1437.24	16.4355	1443.26	11.3102	1452.13	13.83	1452.13	13.83	98.9748
-Spot 94	87.5814	23352.4	3.59347	10.8308	0.754233	3.24518	1.23392	0.255028	0.976574	0.791439	1464.35	12.7926	1468.02	9.57796	1473.32	14.312	1473.32	14.312	99.3917
-Spot 3	98.9351	1.46904e+07	2.24932	10.3531	0.771945	3.43595	1.34206	0.25811	1.09783	0.818017	1480.17	14.5191	1512.66	10.5555	1558.43	14.4836	1558.43	14.4836	94.978
-Spot 48	64.0465	25179.6	1.72992	10.0933	0.819759	3.82326	1.35782	0.279999	1.08244	0.797188	1591.36	15.264	1597.65	10.9291	1605.96	15.2856	1605.96	15.2856	99.0907
-Spot 62	89.5253	52011.5	1.23301	9.99569	0.776545	3.9708	1.2139	0.287991	0.933026	0.768617	1631.48	13.4486	1628.25	9.84644	1624.06	14.4443	1624.06	14.4443	100.457
-Spot 119	134.936	35569.1	0.755874	9.83097	1.0558	4.01156	1.47741	0.286153	1.03345	0.699501	1622.27	14.8222	1636.54	12.0086	1654.91	19.5619	1654.91	19.5619	98.0281
-Spot 50	124.976	36517.9	3.61071	9.6381	0.845795	4.25423	1.42874	0.297509	1.15149	0.805948	1678.94	17.0204	1684.55	11.7467	1691.53	15.5974	1691.53	15.5974	99.256
-Spot 116	201.134	97475.4	3.92446	9.45993	0.700131	4.27177	1.55607	0.293213	1.38967	0.893062	1657.56	20.3116	1687.94	12.8037	1725.86	12.8568	1725.86	12.8568	96.0425
-Spot 102	196.93	93649.4	2.71615	9.30099	0.661367	4.73387	1.29767	0.319473	1.11648	0.860377	1787.15	17.4263	1773.26	10.8787	1756.92	12.098	1756.92	12.098	101.721
-Spot 32	113.772	673556	2.20068	9.29348	0.869426	4.773	1.45617	0.321853	1.16814	0.802195	1798.77	18.3353	1780.16	12.2251	1758.39	15.9011	1758.39	15.9011	102.296
-Spot 37	132.336	123505	1.91582	9.28679	0.664335	4.7392	1.28498	0.319343	1.09992	0.855985	1786.52	17.1625	1774.2	10.7745	1759.71	12.1481	1759.71	12.1481	101.524
-Spot 9	153.255	257078	2.29872	9.1383	0.866318	4.7562	1.31293	0.315364	0.986556	0.751412	1767.05	15.2478	1777.2	11.0158	1789.13	15.7823	1789.13	15.7823	98.766
-Spot 65	194.229	55974	1.28906	9.0868	0.857919	4.8851	1.7396	0.322086	1.51334	0.869933	1799.91	23.7667	1799.69	14.6632	1799.42	15.6113	1799.42	15.6113	100.027
-Spot 96	191.775	212629	3.35313	9.07009	0.685138	4.80217	1.23763	0.316036	1.03068	0.83279	1770.34	15.9556	1785.28	10.4012	1802.77	12.462	1802.77	12.462	98.2013
-Spot 33	452.811	658223	4.03821	9.01853	0.848321	4.72776	1.65516	0.309371	1.42124	0.858669	1737.61	21.6473	1772.17	13.8729	1813.13	15.4088	1813.13	15.4088	95.8349
-Spot 103	232.902	299298	3.15173	8.97984	0.578476	4.91023	1.22403	0.319932	1.07871	0.881277	1789.4	16.8551	1804.02	10.3261	1820.93	10.4967	1820.93	10.4967	98.2683
-Spot 29	174.177	74245.4	1.09952	8.90325	0.891378	5.17303	1.3391	0.334181	0.999322	0.746262	1858.61	16.1358	1848.19	11.3949	1836.46	16.1469	1836.46	16.1469	101.206
-Spot 108	102.845	66512.1	1.11247	8.86255	0.659253	5.14074	1.03424	0.330577	0.796892	0.77051	1841.18	12.7629	1842.86	8.79158	1844.76	11.928	1844.76	11.928	99.8059
-Spot 2	72.3222	131198	1.23612	8.81928	0.711721	5.23062	1.36783	0.334714	1.16808	0.853967	1861.19	18.8833	1857.62	11.6601	1853.61	12.8637	1853.61	12.8637	100.409
-Spot 115	81.281	44510.1	5.65421	8.81304	0.735795	5.15395	1.25302	0.329574	1.01423	0.80943	1836.32	16.2068	1845.05	10.6559	1854.89	13.2969	1854.89	13.2969	98.999
-Spot 41	162.809	212866	9.24859	8.59484	0.733694	5.45877	1.40323	0.340424	1.19613	0.852417	1888.71	19.5829	1894.13	12.0427	1900.07	13.1871	1900.07	13.1871	99.4021
-Spot 63	84.2926	39761	2.64921	8.5501	0.783349	5.66559	1.20903	0.351483	0.920938	0.761714	1941.68	15.4399	1926.14	10.4349	1909.45	14.0659	1909.45	14.0659	101.688
-Spot 61	85.3127	33445.5	0.587027	8.53978	0.848256	5.63194	1.48321	0.348974	1.21671	0.82032	1929.7	20.2906	1921	12.7901	1911.61	15.2275	1911.61	15.2275	100.946
-Spot 14	50.5309	34504.1	0.297231	8.35512	0.698238	5.69192	1.30062	0.345064	1.0973	0.843677	1910.98	18.1469	1930.14	11.2333	1950.76	12.4765	1950.76	12.4765	97.9609
-Spot 22	182.117	48990.1	1.9263	8.08623	0.67381	6.07212	1.30318	0.356266	1.11546	0.855954	1964.45	18.8888	1986.25	11.3617	2009.01	11.9565	2009.01	11.9565	97.7823
-Spot 82	209.201	1.00885e+06	1.48134	7.68805	0.662724	6.86065	1.19884	0.38271	0.999012	0.833312	2088.93	17.8249	2093.59	10.6247	2098.16	11.6427	2098.16	11.6427	99.5602
-Spot 77	158.95	136505	3.31774	6.50128	2.03727	9.29824	3.82614	0.438619	3.23865	0.846454	2344.46	63.6559	2367.85	35.0915	2388.03	34.6906	2388.03	34.6906	98.1754
-Spot 66	169.742	14574.1	1.41352	5.81506	0.799649	10.6465	1.63017	0.44921	1.42056	0.871423	2391.74	28.3857	2492.77	15.1323	2576.14	13.362	2576.14	13.362	92.8419
-Spot 84	73.7508	261291	1.7649	5.61865	0.833481	11.7283	1.38004	0.478139	1.09992	0.797019	2519.16	22.9361	2582.96	12.9125	2633.39	13.8474	2633.39	13.8474	95.662
-Spot 113	113.94	96978.6	1.64541	5.54419	0.782355	12.8259	1.41833	0.515959	1.18304	0.834107	2682.02	25.9566	2666.95	13.3606	2655.53	12.9739	2655.53	12.9739	100.998
-Spot 99	79.521	132692	2.10635	5.48746	0.779216	12.9027	1.28922	0.513736	1.02709	0.796675	2672.56	22.4709	2672.57	12.1496	2672.57	12.9007	2672.57	12.9007	99.9996
-Spot 88	86.0201	74013.7	1.22599	5.40747	0.536782	12.9949	1.4234	0.509866	1.3183	0.926167	2656.06	28.6981	2679.29	13.421	2696.85	8.86692	2696.85	8.86692	98.4874
-Spot 21	67.2696	168425	2.20213	5.3882	0.628732	13.2972	1.23322	0.519866	1.06091	0.860276	2698.61	23.393	2700.98	11.6466	2702.74	10.38	2702.74	10.38	99.8471
-Spot 76	237.029	200413	3.54682	5.33285	0.652241	13.2618	1.39388	0.513155	1.23186	0.883764	2670.08	26.9306	2698.46	13.1615	2719.78	10.7508	2719.78	10.7508	98.1729
-Spot 25	29.9942	337946	0.685904	5.3214	0.948238	13.3891	1.36866	0.51697	0.986958	0.721111	2686.32	21.6824	2707.49	12.9321	2723.32	15.6214	2723.32	15.6214	98.6414
-Spot 72	152.853	69841.6	2.45805	5.20747	0.671109	14.0298	1.41542	0.530111	1.2462	0.880449	2741.92	27.8326	2751.73	13.4165	2758.91	11.022	2758.91	11.022	99.3841
AOS-302 BIAS
							Isotope ratios						Apparent ages (Ma)
Analysis	U	206Pb	U/Th	206Pb*	±	207Pb*	±	206Pb*	±	error	206Pb*	±	207Pb*	±	206Pb*	±	Best age	±	Conc
	(ppm)	204Pb		207Pb*	(%)	235U*	(%)	238U	(%)	corr.	238U*	(Ma)	235U	(Ma)	207Pb*	(Ma)	(Ma)	(Ma)	(%)
-AOS 302 BIAS Spot 41	119.116	35540.6	1.13135	20.157	1.06297	0.172489	1.41521	0.0252277	0.934295	0.660182	160.61	1.48204	161.577	2.114	175.745	24.7965	160.61	1.48204	NA
-AOS 302 BIAS Spot 28	218.575	9869.3	1.23807	20.3449	1.05286	0.211459	1.39236	0.0312153	0.91113	0.654376	198.15	1.77794	194.776	2.46775	154.068	24.642	198.15	1.77794	NA
-AOS 302 BIAS Spot 83	104.534	7695.29	2.2953	20.0894	1.17723	0.279099	1.6521	0.040683	1.15912	0.701605	257.065	2.92107	249.942	3.66035	183.577	27.4169	257.065	2.92107	NA
-AOS 302 BIAS Spot 117	179.569	27153.9	2.55211	19.2923	0.783913	0.292037	1.19654	0.0408799	0.903986	0.755499	258.285	2.2887	260.162	2.74614	277.128	17.961	258.285	2.2887	NA
-AOS 302 BIAS Spot 95	156.451	44943.3	2.05132	19.3283	0.785593	0.324467	1.50789	0.0455044	1.28708	0.853564	286.862	3.6112	285.333	3.75087	272.807	17.989	286.862	3.6112	NA
-AOS 302 BIAS Spot 32	53.0672	6583.39	1.74665	19.4207	1.07903	0.375041	1.35789	0.0528485	0.824351	0.607084	331.986	2.66746	323.383	3.76061	261.865	24.7565	331.986	2.66746	NA
-AOS 302 BIAS Spot 98	201.55	570473	1.63179	18.3601	0.695823	0.443417	1.41943	0.0590711	1.23718	0.871603	369.974	4.44836	372.659	4.42759	389.368	15.62	369.974	4.44836	NA
-AOS 302 BIAS Spot 113	88.0293	7615.22	2.67628	18.3566	0.902964	0.483715	1.17789	0.0644273	0.756367	0.642135	402.494	2.95124	400.619	3.89922	389.793	20.2685	402.494	2.95124	103.258
-AOS 302 BIAS Spot 119	286.781	75743.1	1.00985	18.0997	0.738806	0.495854	1.33619	0.0651198	1.11336	0.833235	406.687	4.38803	408.892	4.49745	421.338	16.492	406.687	4.38803	96.5228
-AOS 302 BIAS Spot 58	108.276	19058.9	6.45869	18.2463	0.902612	0.498731	1.24392	0.0660281	0.855939	0.688097	412.182	3.4176	410.843	4.20308	403.306	20.2127	412.182	3.4176	102.201
-AOS 302 BIAS Spot 118	209.375	39382	4.32698	17.8227	0.770991	0.516588	1.42507	0.0668043	1.1985	0.841011	416.874	4.83813	422.869	4.92887	455.689	17.1176	416.874	4.83813	91.482
-AOS 302 BIAS Spot 115	91.3865	6727.1	1.98981	18.6055	1.30853	0.495941	1.59456	0.0669512	0.911254	0.571476	417.761	3.68613	408.951	5.36773	359.488	29.5298	417.761	3.68613	116.21
-AOS 302 BIAS Spot 54	128.148	113587	3.61251	17.9223	0.94775	0.521427	1.32289	0.0678071	0.922934	0.697665	422.931	3.77808	426.104	4.60361	443.287	21.096	422.931	3.77808	95.4078
-AOS 302 BIAS Spot 1	96.6178	10092.9	1.85256	18.0319	1.10513	0.529547	1.36115	0.0692842	0.794618	0.583784	431.842	3.31908	431.509	4.78499	429.712	24.649	431.842	3.31908	100.496
-AOS 302 BIAS Spot 49	77.1638	31410.3	1.56788	16.9671	0.961519	0.589573	1.36596	0.0725829	0.970227	0.710287	451.698	4.23248	470.595	5.14435	563.816	20.9579	451.698	4.23248	80.1144
-AOS 302 BIAS Spot 125	11.8211	2203.47	1.66139	17.9975	6.19414	0.564371	6.35703	0.0736997	1.42988	0.224928	458.407	6.32703	454.367	23.2909	433.963	138.094	458.407	6.32703	105.633
-AOS 302 BIAS Spot 124	104.832	22289.6	1.43346	17.8057	0.76593	0.612425	1.3103	0.0791224	1.06312	0.81136	490.883	5.02493	485.089	5.05332	457.785	16.9979	490.883	5.02493	107.23
-AOS 302 BIAS Spot 93	215.802	66383.9	1.50163	17.2854	0.715858	0.656469	1.40202	0.0823342	1.20549	0.859824	510.041	5.91155	512.452	5.64183	523.202	15.681	510.041	5.91155	97.4845
-AOS 302 BIAS Spot 68	41.8898	21058.4	2.15059	16.7576	1.19293	0.766859	1.55737	0.0932427	1.00116	0.642855	574.686	5.50454	577.959	6.86343	590.853	25.8685	574.686	5.50454	97.2638
-AOS 302 BIAS Spot 86	29.5338	6546.17	0.482019	14.8965	2.6499	0.868357	2.8357	0.093858	1.00957	0.356021	578.314	5.58425	634.675	13.383	840.913	55.1717	578.314	5.58425	68.7721
-AOS 302 BIAS Spot 62	335.591	20155	1.64048	16.0134	0.741359	0.905255	1.154	0.105182	0.88436	0.766346	644.708	5.42571	654.532	5.56745	688.565	15.8171	644.708	5.42571	93.6307
-AOS 302 BIAS Spot 34	34.6244	18519.6	2.03982	16.3544	0.985336	0.915397	1.39714	0.108625	0.990515	0.708958	664.759	6.25641	659.923	6.77997	643.452	21.1837	664.759	6.25641	103.311
-AOS 302 BIAS Spot 22	60.404	13589.2	1.69516	14.7255	1.06819	1.1989	1.51646	0.128098	1.07639	0.709807	777.008	7.87928	800.081	8.39556	864.901	22.1333	777.008	7.87928	89.8377
-AOS 302 BIAS Spot 2	63.5863	773131	1.42085	14.1175	0.962018	1.32601	1.44779	0.135829	1.08195	0.747311	821.033	8.34075	857.141	8.3807	951.758	19.6843	821.033	8.34075	86.2649
-AOS 302 BIAS Spot 8	26.924	16421.9	1.76974	14.1907	0.990323	1.47268	1.56364	0.151635	1.21006	0.773871	910.122	10.2709	919.228	9.45629	941.145	20.2949	941.145	20.2949	96.7037
-AOS 302 BIAS Spot 121	216.462	133066	9.31123	14.115	0.585855	1.5902	1.20194	0.162862	1.0495	0.873166	972.66	9.47523	966.374	7.49273	952.112	11.9855	952.112	11.9855	102.158
-AOS 302 BIAS Spot 73	47.4617	101566	4.75906	14.1065	0.808903	1.48582	1.23095	0.15208	0.927858	0.753772	912.614	7.89569	924.609	7.47094	953.308	16.5456	953.308	16.5456	95.7313
-AOS 302 BIAS Spot 74	39.7229	30558.6	2.4965	14.0726	0.835997	1.5527	1.17346	0.158544	0.823481	0.701754	948.681	7.26456	951.569	7.2476	958.273	17.0864	958.273	17.0864	98.999
-AOS 302 BIAS Spot 19	76.2669	15857	3.05631	14.0571	0.64107	1.62083	1.1833	0.165318	0.9946	0.840531	986.263	9.09584	978.311	7.43072	960.522	13.0994	960.522	13.0994	102.68
-AOS 302 BIAS Spot 69	41.3313	51646.9	2.49326	13.962	0.847956	1.5801	1.2627	0.160074	0.935624	0.740968	957.186	8.3225	962.409	7.85214	974.381	17.2883	974.381	17.2883	98.2353
-AOS 302 BIAS Spot 108	62.5555	49213.6	3.71633	13.96	0.684841	1.61591	1.12349	0.163678	0.890625	0.792734	977.185	8.07553	976.403	7.0469	974.65	13.9614	974.65	13.9614	100.26
-AOS 302 BIAS Spot 56	118.694	118546	6.63052	13.8133	0.585166	1.74151	1.18302	0.174546	1.02817	0.8691	1037.11	9.84968	1024.02	7.63076	996.137	11.8908	996.137	11.8908	104.113
-AOS 302 BIAS Spot 104	47.3795	18759.6	3.77443	13.8056	0.700666	1.71723	1.19237	0.172017	0.964786	0.809133	1023.22	9.12825	1014.99	7.65158	997.266	14.2156	997.266	14.2156	102.602
-AOS 302 BIAS Spot 59	107.364	287612	5.58625	13.7887	0.585134	1.73399	1.08077	0.173483	0.908667	0.840761	1031.27	8.65971	1021.23	6.96015	999.759	11.8833	999.759	11.8833	103.152
-AOS 302 BIAS Spot 43	12.8554	38366.3	2.63141	13.7425	1.1143	1.6979	1.57251	0.169303	1.10956	0.705599	1008.27	10.3563	1007.74	10.049	1006.57	22.6035	1006.57	22.6035	100.169
-AOS 302 BIAS Spot 109	32.8887	15321.4	2.13207	13.7381	0.921827	1.61567	1.4378	0.161053	1.10341	0.767428	962.626	9.86672	976.313	9.01802	1007.21	18.6814	1007.21	18.6814	95.5731			Rejected Analyses
-AOS 302 BIAS Spot 84	67.351	27818.3	3.71948	13.7255	0.640468	1.71441	1.22739	0.170738	1.04703	0.853059	1016.18	9.84352	1013.93	7.87154	1009.08	12.9887	1009.08	12.9887	100.704			206Pb/238U age	± (Ma)	206Pb/207Pb age	± (Ma)
-AOS 302 BIAS Spot 57	48.0042	20345.7	3.55915	13.6875	0.609736	1.74771	1.07321	0.173572	0.883179	0.822931	1031.76	8.42048	1026.32	6.93139	1014.7	12.3551	1014.7	12.3551	101.681			771.341	5.61562	702.31	20.7103
-AOS 302 BIAS Spot 11	80.362	33166.6	2.76956	13.6794	0.684048	1.71444	1.24394	0.170168	1.03897	0.835227	1013.03	9.73981	1013.95	7.97774	1015.9	13.8586	1015.9	13.8586	99.7178			880.318	8.86821	1188.91	14.6205
-AOS 302 BIAS Spot 112	203.891	90387	3.99319	13.6715	0.543024	1.71327	1.42654	0.169954	1.31915	0.924716	1011.86	12.3531	1013.51	9.1466	1017.06	10.9994	1017.06	10.9994	99.4886			1042	8.97556	970.607	17.1514
-AOS 302 BIAS Spot 13	74.4577	45548.9	4.36925	13.655	0.858731	1.69248	1.21081	0.167688	0.853608	0.704988	999.359	7.90227	1005.7	7.72833	1019.52	17.388	1019.52	17.388	98.0227			1075.01	8.45007	937.84	16.8392
-AOS 302 BIAS Spot 102	45.43	165390	2.13606	13.6133	0.816432	1.8002	1.38117	0.177817	1.11403	0.806587	1055.04	10.8421	1045.53	9.01613	1025.7	16.5155	1025.7	16.5155	102.86			1152.24	9.74191	981.424	15.825
-AOS 302 BIAS Spot 3	110.274	34977.4	4.24325	13.6105	0.605456	1.73834	1.05806	0.171671	0.867707	0.820092	1021.31	8.19562	1022.85	6.82016	1026.13	12.2475	1026.13	12.2475	99.5304			1161.11	8.12992	1081.6	12.6105
-AOS 302 BIAS Spot 78	131.738	77522.5	3.34821	13.6099	0.734225	1.77271	1.24109	0.175057	1.00061	0.806236	1039.92	9.60963	1035.51	8.05706	1026.21	14.8516	1026.21	14.8516	101.336			1299.12	12.2482	1075.48	17.298
-AOS 302 BIAS Spot 27	17.5828	17936.5	2.60726	13.6091	1.04513	1.78256	1.38063	0.17602	0.902141	0.653425	1045.19	8.70442	1039.11	8.98088	1026.32	21.1594	1026.32	21.1594	101.839		Total	7
-AOS 302 BIAS Spot 66	143.902	209451	3.31026	13.6022	0.425552	1.74505	0.956963	0.172229	0.857136	0.895684	1024.38	8.11824	1025.33	6.17715	1027.35	8.60681	1027.35	8.60681	99.7105
-AOS 302 BIAS Spot 0	74.8313	29595.2	3.26201	13.5854	0.766963	1.75857	1.21234	0.173349	0.938907	0.774456	1030.53	8.94199	1030.32	7.84766	1029.85	15.5248	1029.85	15.5248	100.066
-AOS 302 BIAS Spot 72	102.507	658585	3.96031	13.5404	0.545568	1.71999	0.988402	0.168985	0.824193	0.833864	1006.51	7.68044	1016.02	6.34641	1036.55	11.0372	1036.55	11.0372	97.1021
-AOS 302 BIAS Spot 9	39.6721	18404.2	2.32785	13.486	0.877291	1.77853	1.46248	0.174034	1.17013	0.8001	1034.3	11.1816	1037.64	9.50557	1044.71	17.7148	1044.71	17.7148	99.003
-AOS 302 BIAS Spot 10	40.6116	27956.9	1.36661	13.4469	0.814418	1.83504	1.34872	0.179042	1.07507	0.797102	1061.74	10.524	1058.09	8.86442	1050.58	16.4328	1050.58	16.4328	101.063
-AOS 302 BIAS Spot 29	27.1484	27639.6	2.75082	13.4357	0.729405	1.79319	1.22695	0.174813	0.986599	0.804106	1038.58	9.46379	1042.99	7.9982	1052.26	14.7151	1052.26	14.7151	98.7001
-AOS 302 BIAS Spot 116	45.4835	25628.2	3.93015	13.4327	0.916627	1.90442	1.37496	0.185615	1.02485	0.745365	1097.58	10.343	1082.63	9.15452	1052.7	18.487	1052.7	18.487	104.263
-AOS 302 BIAS Spot 128	66.2002	48606.7	3.45175	13.3711	0.705927	1.8542	1.22513	0.179892	1.00131	0.817306	1066.39	9.8414	1064.92	8.08155	1061.95	14.1842	1061.95	14.1842	100.418
-AOS 302 BIAS Spot 90	7.68885	20840.6	1.04263	13.3159	1.38637	1.85166	1.79936	0.178903	1.14704	0.637468	1060.98	11.2211	1064.02	11.864	1070.28	27.8711	1070.28	27.8711	99.1313
-AOS 302 BIAS Spot 40	26.1954	23004.4	1.98585	13.2379	0.808027	1.8843	1.47522	0.180991	1.23425	0.836653	1072.39	12.1936	1075.58	9.78609	1082.07	16.193	1082.07	16.193	99.1056
-AOS 302 BIAS Spot 111	139.414	56802.2	3.59503	13.2205	0.676772	1.87456	1.19718	0.179819	0.987533	0.824882	1065.98	9.70263	1072.14	7.92732	1084.69	13.5566	1084.69	13.5566	98.2757
-AOS 302 BIAS Spot 67	93.8998	68249.4	0.840179	13.2184	0.612031	1.86593	1.06709	0.178963	0.874123	0.819168	1061.31	8.55371	1069.09	7.0545	1084.98	12.2709	1084.98	12.2709	97.8182
-AOS 302 BIAS Spot 110	69.1643	29784.1	1.71871	13.1988	0.683193	1.8935	1.00513	0.181337	0.737242	0.733482	1074.28	7.29528	1078.81	6.67881	1087.97	13.674	1087.97	13.674	98.7415
-AOS 302 BIAS Spot 129	157.416	159327	1.73199	13.1824	0.579258	1.67229	1.11961	0.159954	0.958121	0.85576	956.521	8.51713	998.057	7.11433	1090.45	11.6013	1090.45	11.6013	87.718
-AOS 302 BIAS Spot 81	79.6218	228881	1.94917	13.1567	0.767717	1.954	1.23496	0.186535	0.967333	0.783292	1102.58	9.80334	1099.82	8.2948	1094.36	15.3616	1094.36	15.3616	100.75
-AOS 302 BIAS Spot 75	230.161	102744	46.2559	13.142	0.454319	1.99701	0.929731	0.190427	0.811169	0.872476	1123.69	8.36481	1114.5	6.2905	1096.64	9.08866	1096.64	9.08866	102.467
-AOS 302 BIAS Spot 103	30.1604	11294	1.81696	13.1334	0.894027	1.92921	1.29334	0.183843	0.934587	0.722613	1087.93	9.35601	1091.27	8.64935	1097.93	17.892	1097.93	17.892	99.0898
-AOS 302 BIAS Spot 16	269.353	65129	12.6838	13.102	0.708356	1.78675	1.20678	0.169859	0.977012	0.809602	1011.33	9.14478	1040.64	7.85657	1102.7	14.1837	1102.7	14.1837	91.7142
-AOS 302 BIAS Spot 87	64.8376	8.45508e+06	1.88489	13.1017	0.651569	1.98819	1.10032	0.189005	0.886657	0.805818	1115.99	9.08583	1111.51	7.43372	1102.74	13.0484	1102.74	13.0484	101.201
-AOS 302 BIAS Spot 70	65.6009	34926.9	3.65373	13.0863	0.843298	1.98885	1.12479	0.188845	0.744308	0.661732	1115.12	7.6217	1111.73	7.59987	1105.1	16.8763	1105.1	16.8763	100.907
-AOS 302 BIAS Spot 51	32.8416	7703.74	1.66353	13.0634	0.763476	1.97721	1.18485	0.187412	0.906076	0.764718	1107.34	9.21889	1107.77	7.98999	1108.6	15.2346	1108.6	15.2346	99.8862
-AOS 302 BIAS Spot 20	50.8963	46840.9	1.20529	13.0333	0.748404	1.85437	1.10264	0.175363	0.80975	0.734377	1041.59	7.78816	1064.98	7.27369	1113.2	14.9501	1113.2	14.9501	93.5669
-AOS 302 BIAS Spot 48	25.0893	48768.5	7.51572	12.8712	0.972773	2.06095	1.39174	0.192476	0.995309	0.715157	1134.77	10.3563	1135.94	9.51504	1138.16	19.3321	1138.16	19.3321	99.7023
-AOS 302 BIAS Spot 12	64.9681	41804.8	5.38821	12.8613	0.830614	2.09769	1.39965	0.195755	1.12655	0.804876	1152.48	11.8888	1148.05	9.62426	1139.7	16.5014	1139.7	16.5014	101.121
-AOS 302 BIAS Spot 123	63.546	41735.9	2.68102	12.8572	0.839968	1.99111	1.26143	0.185751	0.941088	0.746051	1098.31	9.50354	1112.5	8.52638	1140.32	16.6954	1140.32	16.6954	96.3165
-AOS 302 BIAS Spot 44	79.1949	82174.2	2.17634	12.8011	0.556729	2.1212	1.03027	0.197023	0.866894	0.841426	1159.31	9.19812	1155.73	7.10964	1149.01	11.0584	1149.01	11.0584	100.896
-AOS 302 BIAS Spot 15	35.2451	16121.5	3.60271	12.7865	0.904256	2.21733	1.29826	0.205717	0.931554	0.717542	1205.96	10.2459	1186.53	9.08525	1151.26	17.971	1151.26	17.971	104.751
-AOS 302 BIAS Spot 46	29.8321	18085.9	2.96534	12.7823	0.82311	2.14333	1.26708	0.198786	0.963323	0.760268	1168.79	10.2976	1162.9	8.77293	1151.91	16.3409	1151.91	16.3409	101.465
-AOS 302 BIAS Spot 17	59.8497	38340.5	2.76423	12.7793	0.793172	2.03458	1.42077	0.188656	1.17875	0.829659	1114.09	12.0602	1127.15	9.67258	1152.38	15.7624	1152.38	15.7624	96.6772
-AOS 302 BIAS Spot 42	51.282	22822.7	1.65896	12.7629	0.679261	2.12419	1.14006	0.196711	0.915609	0.803124	1157.63	9.70215	1156.7	7.87086	1154.94	13.498	1154.94	13.498	100.233
-AOS 302 BIAS Spot 23	7.16207	5270.3	29.4812	12.7457	1.3436	2.23293	1.6832	0.206504	1.01385	0.602338	1210.16	11.1865	1191.44	11.8049	1157.61	26.6707	1157.61	26.6707	104.54
-AOS 302 BIAS Spot 7	34.8368	21720	2.90361	12.7418	0.735268	2.11153	1.21372	0.195217	0.965663	0.79562	1149.57	10.1675	1152.58	8.3634	1158.21	14.5835	1158.21	14.5835	99.254
-AOS 302 BIAS Spot 80	35.7812	25073.1	4.07547	12.7224	0.766308	2.18507	1.22895	0.201707	0.960771	0.781784	1184.48	10.3959	1176.3	8.5609	1161.24	15.2099	1161.24	15.2099	102.001
-AOS 302 BIAS Spot 85	30.0464	22697.9	4.09089	12.6681	0.722944	2.12945	1.41811	0.195734	1.21999	0.860296	1152.36	12.8738	1158.41	9.79832	1169.75	14.3336	1169.75	14.3336	98.5131
-AOS 302 BIAS Spot 91	78.3578	249411	2.44934	12.6423	0.629809	2.1322	1.16182	0.195589	0.976303	0.840322	1151.58	10.2959	1159.3	8.03076	1173.78	12.4812	1173.78	12.4812	98.1088
-AOS 302 BIAS Spot 45	36.8245	87576.9	2.81927	12.6365	0.719088	2.15912	1.30786	0.197967	1.09243	0.835282	1164.39	11.6375	1167.99	9.07637	1174.69	14.2292	1174.69	14.2292	99.1228
-AOS 302 BIAS Spot 5	33.6896	69292.7	1.72445	12.6308	0.863769	2.21393	1.06403	0.2029	0.621335	0.583947	1190.88	6.75612	1185.45	7.44248	1175.58	17.1067	1175.58	17.1067	101.301
-AOS 302 BIAS Spot 77	72.2079	36124.8	3.67465	12.6289	0.699391	2.20823	1.18454	0.202347	0.956024	0.807086	1187.92	10.3718	1183.65	8.2788	1175.88	13.8421	1175.88	13.8421	101.023
-AOS 302 BIAS Spot 38	72.734	13892.7	4.01364	12.5837	1.04533	1.91091	1.38518	0.174477	0.908853	0.656127	1036.73	8.70373	1084.9	9.23335	1182.97	20.6594	1182.97	20.6594	87.6379
-AOS 302 BIAS Spot 18	38.3601	60057.8	6.73817	12.4033	0.773108	2.26614	1.12098	0.203944	0.811725	0.724121	1196.47	8.86406	1201.82	7.89747	1211.42	15.2158	1211.42	15.2158	98.7665
-AOS 302 BIAS Spot 37	17.4523	25157.2	4.77632	12.3469	1.16272	2.19073	1.50747	0.196261	0.959452	0.636464	1155.2	10.1473	1178.1	10.5098	1220.38	22.8725	1220.38	22.8725	94.6588
-AOS 302 BIAS Spot 100	71.7702	305562	2.95059	12.226	0.706976	2.2044	1.06038	0.195551	0.790313	0.74531	1151.38	8.33318	1182.44	7.40702	1239.71	13.8751	1239.71	13.8751	92.8748
-AOS 302 BIAS Spot 63	19.2612	62827	3.52514	12.1982	1.02408	2.42448	1.52233	0.214586	1.12639	0.739911	1253.2	12.8286	1249.89	10.9441	1244.16	20.0779	1244.16	20.0779	100.727
-AOS 302 BIAS Spot 26	103.955	144489	2.15224	12.1404	0.624314	2.35388	1.06585	0.20735	0.863871	0.810498	1214.69	9.56399	1228.73	7.59578	1253.49	12.224	1253.49	12.224	96.9042
-AOS 302 BIAS Spot 6	45.8645	81265	3.89906	12.1264	0.771497	2.4043	1.24987	0.211548	0.983348	0.786759	1237.06	11.0686	1243.89	8.9633	1255.74	15.0944	1255.74	15.0944	98.5123
-AOS 302 BIAS Spot 52	27.3523	64925.8	2.08143	12.0748	0.839185	2.44232	1.1802	0.213978	0.82984	0.703136	1249.98	9.42914	1255.16	8.50249	1264.08	16.3867	1264.08	16.3867	98.8845
-AOS 302 BIAS Spot 97	68.22	127306	3.212	12.0703	0.65806	2.49765	1.33546	0.218746	1.16207	0.870166	1275.24	13.4456	1271.35	9.68345	1264.8	12.8536	1264.8	12.8536	100.826
-AOS 302 BIAS Spot 106	87.3394	34176.1	9.10249	12.0576	0.584015	2.45159	1.02752	0.214485	0.845409	0.822769	1252.67	9.62477	1257.89	7.41063	1266.83	11.3851	1266.83	11.3851	98.8818
-AOS 302 BIAS Spot 71	71.6583	269649	3.13873	11.9555	0.692673	2.4646	1.31102	0.213797	1.1131	0.849029	1249.01	12.6388	1261.71	9.46991	1283.42	13.4789	1283.42	13.4789	97.3194
-AOS 302 BIAS Spot 64	234.389	175298	1.91103	11.7628	0.689364	2.50383	1.55271	0.2137	1.39129	0.89604	1248.5	15.7918	1273.15	11.2668	1314.99	13.3686	1314.99	13.3686	94.9441
-AOS 302 BIAS Spot 114	78.9452	668858	3.02096	11.6785	0.56591	2.66387	0.994384	0.225729	0.817646	0.822264	1312.08	9.70681	1318.5	7.34116	1328.93	10.9536	1328.93	10.9536	98.7315
-AOS 302 BIAS Spot 127	23.3637	97337.6	1.71049	11.6627	0.755134	2.75325	1.05196	0.232988	0.73239	0.696214	1350.14	8.92147	1342.97	7.83568	1331.54	14.6102	1331.54	14.6102	101.397
-AOS 302 BIAS Spot 55	39.3828	21963.5	2.64115	11.5816	0.592135	2.70681	1.23689	0.227465	1.08594	0.877963	1321.2	12.9727	1330.33	9.17128	1345.03	11.4348	1345.03	11.4348	98.2284
-AOS 302 BIAS Spot 126	94.9876	29310.5	3.98615	11.4923	0.568116	2.90257	1.1053	0.242034	0.948122	0.857795	1397.26	11.9104	1382.58	8.34742	1359.97	10.9487	1359.97	10.9487	102.742
-AOS 302 BIAS Spot 101	54.7107	371101	2.68991	11.3592	0.831094	2.90151	1.18728	0.239143	0.847896	0.714147	1382.24	10.5487	1382.3	8.96577	1382.38	15.966	1382.38	15.966	99.9898
-AOS 302 BIAS Spot 65	37.129	25765.2	2.17113	11.2162	0.70802	2.92429	1.06212	0.237988	0.791714	0.745408	1376.23	9.81129	1388.22	8.03661	1406.67	13.5567	1406.67	13.5567	97.8358
-AOS 302 BIAS Spot 33	152.881	21300.8	2.66398	11.0901	0.746869	2.80091	1.56202	0.225384	1.37189	0.878282	1310.26	16.2663	1355.78	11.6882	1428.29	14.2586	1428.29	14.2586	91.7363
-AOS 302 BIAS Spot 35	103.993	55602.7	2.12086	10.8602	1.17771	3.06006	1.84864	0.241133	1.42494	0.770807	1392.58	17.8466	1422.75	14.1484	1468.18	22.3637	1468.18	22.3637	94.8514
-AOS 302 BIAS Spot 30	78.3248	17081.7	1.81891	10.8524	0.719483	3.30107	1.66146	0.259936	1.4976	0.901374	1489.52	19.9174	1481.3	12.9486	1469.55	13.6596	1469.55	13.6596	101.359
-AOS 302 BIAS Spot 76	185.422	42550.2	1.32747	10.7312	0.53723	3.34258	1.01406	0.260265	0.860054	0.848133	1491.2	11.4498	1491.06	7.92564	1490.84	10.1703	1490.84	10.1703	100.024
-AOS 302 BIAS Spot 122	11.6077	2836.69	2.82724	10.4549	2.35922	3.05254	2.55064	0.231562	0.969445	0.380079	1342.68	11.7504	1420.87	19.5104	1540.06	44.3743	1540.06	44.3743	87.1839
-AOS 302 BIAS Spot 79	12.298	5994.93	6.75127	10.4508	1.15596	3.4411	1.55277	0.260937	1.03675	0.667676	1494.63	13.8304	1513.84	12.217	1540.78	21.738	1540.78	21.738	97.0048
-AOS 302 BIAS Spot 88	187.519	160763	2.0775	10.395	0.484674	3.5029	1.31613	0.264203	1.22364	0.929724	1511.31	16.4852	1527.87	10.3963	1550.86	9.10264	1550.86	9.10264	97.45
-AOS 302 BIAS Spot 61	66.0311	56471.2	2.39524	9.71544	0.576375	4.13527	1.19706	0.291511	1.04917	0.876451	1649.07	15.2658	1661.3	9.78816	1676.78	10.65	1676.78	10.65	98.3479
-AOS 302 BIAS Spot 96	67.3608	46151.5	1.7474	9.669	0.579062	4.10573	1.13836	0.288045	0.980082	0.860956	1631.75	14.129	1655.44	9.29514	1685.63	10.6876	1685.63	10.6876	96.8039
-AOS 302 BIAS Spot 92	109.844	116225	7.12704	9.44399	0.504475	4.53318	1.085	0.310632	0.960585	0.885334	1743.82	14.6764	1737.08	9.02605	1728.96	9.26023	1728.96	9.26023	100.859
-AOS 302 BIAS Spot 94	41.9986	177519	4.49643	8.96297	0.738033	5.23475	1.11414	0.340436	0.834642	0.749132	1888.77	13.665	1858.29	9.49863	1824.34	13.3869	1824.34	13.3869	103.531
-AOS 302 BIAS Spot 25	48.6117	55182.5	1.56795	8.92517	0.638199	4.89013	1.19055	0.316683	1.00505	0.844185	1773.51	15.5829	1800.56	10.0366	1832.01	11.5669	1832.01	11.5669	96.807
-AOS 302 BIAS Spot 4	31.4189	28826.6	2.41054	8.91175	0.722346	5.13635	1.14189	0.332128	0.884384	0.77449	1848.69	14.2141	1842.14	9.70539	1834.73	13.0876	1834.73	13.0876	100.761
-AOS 302 BIAS Spot 47	16.4231	20666.5	122.525	8.80102	0.791516	5.01974	1.19958	0.320555	0.901385	0.751417	1792.44	14.1051	1822.66	10.1573	1857.35	14.2997	1857.35	14.2997	96.505
-AOS 302 BIAS Spot 89	50.0927	38109.7	3.58756	7.00775	0.991355	7.67567	1.36477	0.390286	0.937981	0.687282	2124.15	16.9743	2193.76	12.2609	2259.45	17.1079	2259.45	17.1079	94.0119
-AOS 302 BIAS Spot 24	21.7011	10470.8	3.11873	6.35833	0.544961	9.20533	1.114	0.424688	0.971607	0.872176	2281.73	18.6707	2358.64	10.2034	2425.81	9.24073	2425.81	9.24073	94.0604
-AOS 302 BIAS Spot 107	40.8407	58210.1	0.875733	5.65591	0.522414	12.7257	1.11234	0.522241	0.982026	0.88285	2708.68	21.7185	2659.56	10.472	2622.4	8.69043	2622.4	8.69043	103.29
-AOS 302 BIAS Spot 39	33.3314	39831.7	1.10128	5.37351	0.53694	13.239	1.25304	0.516179	1.13216	0.903536	2682.95	24.8473	2696.84	11.8301	2707.25	8.86077	2707.25	8.86077	99.1025
-AOS 302 BIAS Spot 60	45.7667	67351.2	2.95202	5.32089	0.625808	13.6029	1.21177	0.525173	1.03767	0.856324	2721.08	23.0337	2722.46	11.4621	2723.48	10.3115	2723.48	10.3115	99.9122
-AOS 302 BIAS Spot 120	86.453	721401	4.63734	4.76081	0.59756	15.9496	1.18538	0.550957	1.02374	0.86364	2829.15	23.4438	2873.78	11.3265	2905.2	9.68619	2905.2	9.68619	97.3823
-AOS 302 BIAS Spot 99	28.3288	20334.8	1.17825	4.50739	0.662483	17.989	1.2239	0.588329	1.0291	0.840836	2982.64	24.5729	2989.15	11.7733	2993.51	10.653	2993.51	10.653	99.6371
-AOS 302 BIAS Spot 82	77.4293	46420.3	2.41297	3.37484	0.527007	29.0186	0.897225	0.710587	0.726138	0.809315	3460.67	19.4451	3454.15	8.80701	3450.36	8.17619	3450.36	8.17619	100.299
AOS-7 UPGRD
							Isotope ratios						Apparent ages (Ma)
Analysis	U	206Pb	U/Th	206Pb*	±	207Pb*	±	206Pb*	±	error	206Pb*	±	207Pb*	±	206Pb*	±	Best age	±	Conc
	(ppm)	204Pb		207Pb*	(%)	235U*	(%)	238U	(%)	corr.	238U*	(Ma)	235U	(Ma)	207Pb*	(Ma)	(Ma)	(Ma)	(%)
AOS7 462	1621.96	7166.09	0.720028	18.2398	5.81528	0.130929	5.98669	0.0178927	1.13156	0.189013	114.324	1.28225	124.933	7.03761	332.817	133.389	114.324	1.28225	34.3504			Rejected Analyses
AOS7 1037	1922.53	5279.79	1.18112	17.0473	3.96435	0.140363	4.92697	0.0180399	1.57572	0.319816	115.256	1.79998	133.367	6.15778	470.302	103.391	115.256	1.79998	24.5069			206Pb/238U age	± (Ma)	206Pb/207Pb age	± (Ma)
AOS7 101	787.459	1936.76	1.33272	15.7804	4.98371	0.145665	6.63984	0.019071	2.08426	0.313902	121.782	2.51443	138.077	8.57225	429.195	140.64	121.782	2.51443	28.3745			179.308	1.68281	390.382	81.3817
AOS7 693	1291.8	4568.2	1.62117	17.6427	4.73322	0.140138	5.77952	0.0191502	1.04701	0.181159	122.283	1.26825	133.167	7.2132	332.945	128.965	122.283	1.26825	36.7277			343.642	41.4012	986.844	451.588
AOS7 151	1450.34	5956.6	1.76921	18.4654	7.66612	0.170068	8.86418	0.0233046	0.650249	0.0733569	148.508	0.95463	159.478	13.0829	326.681	201.024	148.508	0.95463	45.4595			345.074	3.06634	481.535	56.7473
AOS7 1007	1246.66	1248.64	0.860731	17.7129	5.70058	0.153751	10.1592	0.0248594	1.07786	0.106097	158.295	1.68542	145.219	13.7474	NA	NA	158.295	1.68542				353.798	2.2842	474.436	419.279
AOS7 460	889.81	5352.11	0.987569	17.9601	8.28076	0.192754	9.09353	0.0263541	0.852049	0.0936984	167.689	1.41037	178.977	14.9227	331.783	205.68	167.689	1.41037	50.5419			392.02	8.06288	691.929	183.451
AOS7 720	1822.96	6316.46	0.76444	18.857	3.46599	0.194591	4.59279	0.0280525	1.03177	0.22465	178.348	1.81492	180.539	7.5966	210.326	103.762	178.348	1.81492	84.7958			428.723	3.00995	793.806	84.105
AOS7 309	169.122	875.607	0.772104	9.74787	5.93426	0.415167	19.5853	0.0331058	3.91464	0.199877	209.957	8.08667	352.589	58.4055	1446.43	368.875	209.957	8.08667	14.5155			439.246	4.80311	340.656	328.484
AOS7 62	1047.85	6910.94	1.06142	19.2701	4.41221	0.248115	4.8033	0.0353467	0.994376	0.207019	223.925	2.18843	225.044	9.69574	237.784	108.442	223.925	2.18843	94.1714			448.235	9.97963	NA	NA
AOS7 793	1400.82	23866.7	0.900578	19.2599	2.26347	0.27864	2.45296	0.0386908	0.729565	0.297423	244.713	1.75188	249.578	5.42774	296.576	53.4388	244.713	1.75188	82.5128			458.95	11.7992	752.314	NA
AOS7 1015	274.477	2785.29	1.32767	14.9262	10.7648	0.330834	11.8362	0.0387697	2.11422	0.178623	245.203	5.08678	290.202	29.8851	671.196	249.95	245.203	5.08678	36.5322			463.898	3.22037	346.841	105.406
AOS7 814	3411.18	22457.2	64.1508	18.4741	2.72484	0.314302	2.82499	0.0425143	0.681177	0.241126	268.399	1.79073	277.51	6.85971	356.018	61.9129	268.399	1.79073	75.3891			474.516	4.63402	530.151	158.532
AOS7 146	1165.17	2858.54	0.477392	16.574	7.49842	0.330377	8.32251	0.0426227	3.04907	0.366364	269.069	8.03525	289.854	20.9885	461.893	171.89	269.069	8.03525	58.2536			486.618	31.1467	1594.73	132.967
AOS7 84	168.301	826.24	1.28461	14.6616	20.7789	0.29489	26.5488	0.0427936	2.40867	0.0907263	270.126	6.372	262.401	61.4655	195.012	NA	270.126	6.372	138.517			488.643	15.7788	1522.81	1029.56
AOS7 862	888.472	2495.23	1.83102	15.9819	3.27457	0.349674	8.259	0.0448318	0.794448	0.0961917	282.713	2.19747	304.476	21.7299	475.741	182.06	282.713	2.19747	59.4258			502.889	5.04131	725.985	102.532
AOS7 1057	369.593	2652.93	1.23168	18.3481	4.38533	0.315099	9.57526	0.0464148	1.34517	0.140484	292.473	3.84634	278.126	23.2995	160.137	NA	292.473	3.84634	182.64			504.584	10.4694	883.692	120.46
AOS7 395	1102.26	4171.24	1.32759	17.2846	3.1826	0.369961	3.76131	0.0479419	0.867026	0.230512	301.874	2.55698	319.624	10.3141	452.042	81.3017	301.874	2.55698	66.7799			522.929	26.8716	733.376	371.811
AOS7 1145	1548.95	7366.49	1.97388	17.3338	1.17709	0.380075	2.38408	0.0495125	1.20272	0.504482	311.528	3.65773	327.094	6.66689	440.343	45.8243	311.528	3.65773	70.7466			542.074	16.2075	868.292	143.288
AOS7 676	1466.82	15837.9	10.6289	17.6783	3.54018	0.377497	3.71129	0.0503673	0.953655	0.256961	316.776	2.94793	325.195	10.3274	386.868	80.5539	316.776	2.94793	81.8821			593.266	8.32307	597.112	96.2424
AOS7 87	908.696	10208.1	1.6976	19.2971	3.64141	0.351378	3.99468	0.0510486	1.23537	0.309253	320.956	3.8679	305.757	10.5469	192.388	88.392	320.956	3.8679	166.828			600.376	6.02395	449.027	159.593
AOS7 128	396.837	2638.62	3.37225	16.4467	9.12363	0.39873	10.2507	0.0516223	2.89001	0.281932	324.474	9.14525	340.727	29.6793	454.136	218.752	324.474	9.14525	71.4485			601.276	4.34713	545.97	48.4659
AOS7 105	227.814	4572.59	1.69455	17.7976	7.06973	0.375949	7.99997	0.0517138	2.61822	0.327279	325.035	8.29915	324.053	22.198	317.97	172.064	325.035	8.29915	102.222			610.633	4.2304	326.411	131.174
AOS7 920	82.4281	1308.19	0.528767	12.3813	3.55831	0.500605	15.8458	0.0520033	3.96384	0.25015	326.809	12.6313	412.112	53.7253	923.899	317.025	326.809	12.6313	35.3728			614.14	4.5939	654.364	261.035
AOS7 623	651.632	6499.33	0.546349	17.6726	7.74602	0.394982	8.32708	0.0520418	0.841624	0.101071	327.045	2.68384	338.002	23.9448	415.029	185.393	327.045	2.68384	78.8005			618.829	5.70492	519.514	72.0329
AOS7 702	275.696	1905.41	3.40713	16.3678	5.98146	0.380995	10.7163	0.0521478	2.08735	0.194782	327.695	6.66918	327.77	30.0282	329.282	239.026	327.695	6.66918	99.518			619.815	9.36294	423.35	146.351
AOS7 562	2345	26195	15.4199	19.1752	2.23156	0.369146	2.35226	0.0523284	0.60866	0.258755	328.801	1.9511	319.02	6.43977	249.18	52.289	328.801	1.9511	131.953			620.406	4.56998	516.617	112.198
AOS7 154	316.419	3234.69	1.10592	14.4801	15.2785	0.480526	16.616	0.0526862	3.05289	0.183732	330.992	9.8498	398.434	54.8124	812.002	343.732	330.992	9.8498	40.7625			621.924	13.9091	702.526	277.41
AOS7 265	997.145	7668.18	1.79051	17.9049	4.95354	0.394937	6.00475	0.0527261	0.506023	0.0842705	331.237	1.6338	337.969	17.2639	385.507	134.508	331.237	1.6338	85.9224			626.691	19.7592	733.813	318.244
AOS7 27	1868.36	6484.05	1.13718	17.2543	2.58122	0.408651	2.86788	0.0531613	0.594949	0.207453	333.901	1.93597	347.903	8.44792	443.428	62.417	333.901	1.93597	75.3			626.903	9.37841	513.075	341.546
AOS7 471	586.782	5710.62	1.75171	17.5693	3.67957	0.410206	6.21925	0.05426	4.52729	0.727948	340.623	15.0207	349.024	18.3711	406.262	95.4828	340.623	15.0207	83.8431			630.228	7.33036	892.216	153.522
AOS7 782	1461.19	8154.57	3.53843	16.7347	1.82511	0.43709	2.43239	0.054405	0.90583	0.372404	341.509	3.01298	368.198	7.51203	540.829	49.3711	341.509	3.01298	63.1455			631.646	6.91568	494.005	162.726
AOS7 675	1032.74	2517.92	2.004	16.5672	3.26995	0.405395	3.80654	0.0551621	0.913723	0.24004	346.136	3.07932	345.553	11.1496	342.598	83.6626	346.136	3.07932	101.033			640.914	9.83392	555.574	86.4604
AOS7 392	914.933	5728.29	3.75426	19.4598	3.71082	0.380816	4.75167	0.0552113	0.787132	0.165654	346.437	2.65494	327.638	13.307	197.16	108.919	346.437	2.65494	175.714			641.203	27.9017	1162.54	352.65
AOS7 887	704.887	9147.05	1.40131	17.6234	5.68153	0.435198	5.81666	0.0559123	1.04153	0.179059	350.718	3.55524	366.861	17.9112	471.168	126.725	350.718	3.55524	74.4359			648.681	6.28487	436.708	125.668
AOS7 763	1218.63	13510.7	3.33372	17.6052	3.59827	0.432781	3.7251	0.0560711	0.797731	0.21415	351.687	2.73036	365.15	11.4255	452.498	80.8278	351.687	2.73036	77.7213			650.351	11.9397	775.758	503.703
AOS7 661	601.868	6753.19	1.13725	17.9175	3.82763	0.42236	4.64557	0.0568363	1.05107	0.226253	356.357	3.64393	357.737	14.0078	367.659	102.027	356.357	3.64393	96.9259			651.948	25.089	951.971	506.101
AOS7 314	2118.39	21344.1	17.1096	17.049	1.5369	0.471882	2.0769	0.0572569	1.15027	0.553839	358.921	4.01573	392.488	6.76103	596.295	37.4659	358.921	4.01573	60.1919			653.854	9.02404	556.046	108.01
AOS7 356	812.111	12779.3	1.28587	19.0942	4.12849	0.41442	4.4003	0.0574415	1.29661	0.294663	360.047	4.54042	352.053	13.0918	300.679	95.9152	360.047	4.54042	119.745			657.307	10.7294	970.94	336.399
AOS7 958	697.702	5111.11	0.853191	19.4139	3.52481	0.392683	5.5095	0.0583416	0.882599	0.160196	365.532	3.13642	336.327	15.7749	140.01	127.764	365.532	3.13642	261.076			669.017	15.8902	NA	NA
AOS7 797	534.243	11426	2.24163	17.4138	8.72802	0.461195	9.14521	0.058515	1.56164	0.17076	366.588	5.56505	385.089	29.3171	498.77	198.851	366.588	5.56505	73.4985			677.33	4.32759	570.175	95.6288
AOS7 716	330.446	5318.46	2.19147	19.1748	4.35659	0.397026	5.58184	0.0587596	3.26494	0.584921	368.077	11.6808	339.489	16.1086	149.088	106.163	368.077	11.6808	246.887			679.004	5.95554	611.465	109.752
AOS7 1184	760.15	9527.76	7.92784	18.0853	4.12851	0.445187	4.33734	0.0591053	0.821739	0.189457	370.182	2.95624	373.904	13.5674	397.983	95.491	370.182	2.95624	93.0145			679.492	5.75493	446.132	180.515
AOS7 1174	891.572	10373.5	3.86082	18.4253	4.81001	0.438871	5.02718	0.0592732	0.99498	0.19792	371.204	3.58908	369.456	15.5705	359.469	111.25	371.204	3.58908	103.264			688.009	13.253	1015.02	94.5301
AOS7 477	1116.07	10625	2.51397	17.9499	2.61031	0.45356	2.80698	0.0597839	0.696812	0.248243	374.311	2.53397	379.769	8.89369	414.131	60.7792	374.311	2.53397	90.3848			704.071	13.7591	1035.68	65.3099
AOS7 95	543.405	4224.17	5.63064	18.0563	4.05515	0.42707	6.48384	0.0598388	0.715528	0.110356	374.645	2.60428	361.094	19.7047	275.905	147.716	374.645	2.60428	135.788			711.935	10.8878	499.298	145.397
AOS7 522	1102.89	22727.5	1.75797	19.082	3.26588	0.433073	3.39182	0.0599347	0.584933	0.172454	375.228	2.13218	365.356	10.4081	304.159	76.1577	375.228	2.13218	123.366			723.878	5.83714	1127.22	68.7746
AOS7 125	533.333	4777.38	0.875751	17.5521	5.03127	0.455038	5.69997	0.0603369	0.72291	0.126827	377.674	2.6518	380.801	18.1018	400.813	126.775	377.674	2.6518	94.227			729.253	6.3175	662.339	87.3095
AOS7 1080	333.726	3795.33	1.20717	15.7939	8.54993	0.504018	10.3932	0.0606049	2.13369	0.205297	379.303	7.85965	414.418	35.3791	615.869	220.179	379.303	7.85965	61.5883			738.846	12.2425	1325.22	77.0853
AOS7 1190	187.323	3424.17	0.936667	12.9551	7.67901	0.627595	8.08762	0.0617609	1.905	0.235545	386.325	7.1433	494.596	31.6756	1034.11	159.039	386.325	7.1433	37.3582			739.554	10.455	1394.7	26.9812
AOS7 114	283.046	5671.34	0.671176	16.5871	11.737	0.492816	11.8752	0.0618658	1.47847	0.1245	386.963	5.55279	406.828	39.8266	522.138	259.298	386.963	5.55279	74.1111			745.912	15.3324	947.149	89.1997
AOS7 902	989.898	7284.16	2.00212	16.9998	1.63923	0.489861	2.13651	0.0619285	0.894267	0.418563	387.343	3.36187	404.815	7.13296	506.717	42.6897	387.343	3.36187	76.4417			756.618	9.42272	708.468	222.84
AOS7 724	1054.87	14719.1	4.22953	17.7441	4.17445	0.470402	4.29931	0.0621011	0.812621	0.189012	388.391	3.06295	391.466	13.9666	410.631	94.4643	388.391	3.06295	94.5839			763.895	9.68335	1223.68	56.9528
AOS7 5	1420.21	6462.3	2.44442	18.7932	1.56584	0.44947	2.15598	0.0623076	1.22127	0.566458	389.644	4.61765	376.908	6.78847	300.384	40.521	389.644	4.61765	129.715			771.006	21.1062	861.889	284.077
AOS7 280	594.907	3257	2.42137	16.3713	4.45547	0.498832	5.92192	0.0637157	0.628527	0.106136	398.183	2.42697	410.912	20.0148	484.037	130.106	398.183	2.42697	82.263			808.304	6.73576	612.858	111.645
AOS7 1065	582.093	9594.82	4.22766	17.9813	5.32257	0.497136	5.36929	0.0644849	0.690047	0.128517	402.843	2.69473	409.762	18.1054	449.878	118.361	402.843	2.69473	89.5451			818.301	25.8302	678.144	205.502
AOS7 55	599.026	5226.98	2.06479	18.5451	1.93583	0.466329	3.85219	0.064554	0.985951	0.255946	403.261	3.85415	388.65	12.44	303.585	84.8778	403.261	3.85415	132.833			833.133	17.6341	1107.76	49.7984
AOS7 537	481.959	4926.63	2.59032	18.1607	6.93134	0.472557	7.27426	0.0645991	1.22337	0.168178	403.535	4.78539	392.954	23.7072	332.156	162.785	403.535	4.78539	121.489			836.813	14.3007	1191.08	287.84
AOS7 850	569.269	8775.23	6.61255	17.8561	2.70692	0.487917	3.16433	0.0648918	1.40926	0.445357	405.307	5.53596	403.49	10.5364	394.055	63.5516	405.307	5.53596	102.855			845.179	7.69747	1086.75	29.5851
AOS7 464	563.342	5977.19	6.24125	17.0998	6.00424	0.503989	7.48739	0.0649909	1.13601	0.151723	405.906	4.46897	414.399	25.4817	462.956	164.226	405.906	4.46897	87.6772			846.479	4.85779	1088.05	25.6739
AOS7 1090	327.872	3808.81	3.84949	17.2472	7.67228	0.483035	10.4329	0.0651054	1.26823	0.12156	406.599	4.99734	400.153	34.5167	364.055	234.027	406.599	4.99734	111.686			852.828	46.0387	891.027	293.687
AOS7 446	310.641	2915.39	4.55172	14.7775	6.93274	0.563435	8.62215	0.0654328	1.01453	0.117665	408.581	4.01653	453.76	31.5609	690.54	182.916	408.581	4.01653	59.1683			899.996	12.6026	761.156	235.81
AOS7 38	520.768	4246.69	3.4435	17.8821	4.58635	0.484624	4.9879	0.0656188	0.94691	0.189841	409.706	3.75883	401.24	16.5339	353.75	110.675	409.706	3.75883	115.818			910.444	45.2347	2120.6	1588.21
AOS7 827	302.897	2827.14	6.74037	17.902	9.71437	0.459541	10.7794	0.0656523	1.58038	0.146612	409.909	6.27645	383.939	34.4745	231.204	NA	409.909	6.27645	177.293			911.301	28.8294	1332.48	74.3895
AOS7 633	508.328	6307.26	3.04887	16.5186	6.95751	0.534932	7.15538	0.0658369	0.832448	0.116339	411.025	3.31477	435.077	25.3257	565.395	154.943	411.025	3.31477	72.6971			914.002	52.4803	1332.34	55.7332
AOS7 881	270.424	3611.64	5.70446	11.595	12.5143	0.765519	12.6573	0.0658687	1.37412	0.108563	411.217	5.47415	577.189	55.7818	1300.08	245.461	411.217	5.47415	31.6301			925.111	5.58199	1110.89	28.1044
AOS7 587	416.367	7432.3	2.96138	18.6769	5.78603	0.476168	6.82608	0.0660842	1.06898	0.156602	412.521	4.27163	395.441	22.3612	297.745	153.959	412.521	4.27163	138.548			937.551	77.9519	222.43	NA
AOS7 808	410.139	4432.37	1.55783	16.156	3.94732	0.538984	4.10955	0.0660986	0.82764	0.201394	412.608	3.30792	437.754	14.6149	573.228	87.5607	412.608	3.30792	71.9797			947.768	11.4441	1601.71	38.5809
AOS7 155	520.426	4112.01	1.88376	18.768	2.7482	0.464468	7.37717	0.0661801	0.569943	0.0772576	413.101	2.28059	387.361	23.7616	237.337	169.842	413.101	2.28059	174.056			950.479	9.96451	1192.32	24.9811
AOS7 1071	2003.72	23759.7	20.6708	18.2632	2.28063	0.506964	2.46152	0.0662293	0.745716	0.30295	413.398	2.98601	416.405	8.40847	434.051	52.266	413.398	2.98601	95.2419			960.293	13.7042	1051.44	487.061
AOS7 411	668.968	8975.2	1.19993	16.4831	8.86298	0.558954	8.9718	0.0664012	0.687869	0.0766701	414.438	2.76108	450.846	32.674	642.018	192.654	414.438	2.76108	64.5524			961.56	12.6447	1322.85	41.4811
AOS7 707	391.789	6025.39	4.66723	17.4468	3.35307	0.506214	4.33832	0.0672314	0.868085	0.200097	419.454	3.52528	415.9	14.8057	397.185	95.322	419.454	3.52528	105.607			979.164	16.972	934.452	294.803
AOS7 248	316.182	3253.49	2.00731	18.0876	6.02514	0.482108	6.99597	0.0672368	2.67854	0.382869	419.487	10.8784	399.518	23.1109	286.586	147.871	419.487	10.8784	146.374			979.815	22.313	1829.35	264.531
AOS7 741	513.69	3979.25	3.9234	17.7527	4.66713	0.49092	6.73551	0.067259	1.07873	0.160155	419.621	4.38239	405.537	22.5231	327.105	151.045	419.621	4.38239	128.283			982.272	7.32556	892.592	211.372
AOS7 182	697.163	6813.51	3.91342	18.3047	8.41349	0.50172	8.65982	0.0673334	1.11767	0.129064	420.07	4.54529	412.866	29.3854	373.751	193.623	420.07	4.54529	112.393			985.5	8.72874	882.744	110.786
AOS7 820	1159.75	16412.4	2.01264	17.7407	4.53658	0.516574	4.71529	0.0673552	0.953688	0.202255	420.202	3.8796	422.86	16.3096	438.328	102.812	420.202	3.8796	95.8646			985.879	5.92361	1043.38	22.2057
AOS7 679	541.428	10625.4	1.68462	17.204	4.89831	0.520561	5.26334	0.0673899	1.40436	0.26682	420.411	5.7157	425.526	18.2981	454.316	112.663	420.411	5.7157	92.5373			992.094	16.2687	861.148	333.646
AOS7 298	175.563	2249.49	1.79222	13.7662	6.85244	0.637062	8.50073	0.0677288	1.76996	0.208213	422.458	7.23759	500.486	33.6017	876.144	172.408	422.458	7.23759	48.2179			994.3	116.187	1560.5	419.372
AOS7 365	1438.08	12430.4	4.39729	17.035	1.81751	0.543995	2.11167	0.0681748	0.877453	0.415525	425.15	3.61014	441.056	7.55464	525.861	42.113	425.15	3.61014	80.8483			1000.2	6.75791	1111.58	37.7951
AOS7 1193	379.824	12082.1	2.47985	16.5739	9.86444	0.556156	10.074	0.0682578	1.8456	0.183205	425.651	7.60208	449.022	36.5732	571.486	215.927	425.651	7.60208	74.4815			1002.97	31.1354	1264.6	281.315
AOS7 665	229.936	2031.57	1.08605	15.646	9.48518	0.536064	11.9531	0.0684436	1.88423	0.157636	426.772	7.78095	435.826	42.3807	484.935	261.394	426.772	7.78095	88.006			1006.82	39.6851	1043.36	206.397
AOS7 816	654.551	8072.6	1.16994	18.1981	5.27924	0.502995	6.34848	0.0684707	1.13622	0.178975	426.935	4.69378	413.728	21.576	341.682	141.516	426.935	4.69378	124.951			1006.9	11.9827	1731.12	86.5672
AOS7 893	1462.6	16090.6	2.49218	18.0607	1.56743	0.526636	2.23792	0.0685401	0.688879	0.307821	427.354	2.84849	429.575	7.83896	442.448	47.3773	427.354	2.84849	96.5886			1008.47	6.58999	900.424	110.975
AOS7 819	384.54	3459.66	0.763038	17.5768	6.00769	0.499268	6.55498	0.0685754	2.07461	0.316494	427.567	8.58259	411.207	22.1679	321.381	141.406	427.567	8.58259	133.041			1010.14	15.0557	1122.52	601.338
AOS7 501	345.989	4431.17	1.73639	16.4737	7.77092	0.549881	8.79314	0.0689468	1.13723	0.129331	429.807	4.7285	444.919	31.6873	524.77	191.523	429.807	4.7285	81.904			1014.25	8.8077	377.311	190.185
AOS7 975	501.998	4878.69	6.66942	16.4911	10.5724	0.550019	10.717	0.0690112	0.913429	0.0852322	430.196	3.80129	445.009	38.6324	523.268	234.798	430.196	3.80129	82.2133			1014.83	7.42009	904.086	71.5677
AOS7 1002	567.959	12910.7	0.982183	18.0171	6.01763	0.526358	6.3026	0.0690184	0.968993	0.153745	430.239	4.03291	429.39	22.0721	425.787	139.042	430.239	4.03291	101.046			1016.64	7.60977	889.791	143.895
AOS7 802	682.411	13534.4	1.46726	16.4535	4.12934	0.580599	4.45124	0.0694949	1.12456	0.25264	433.112	4.7106	464.846	16.6037	625.735	92.8751	433.112	4.7106	69.2165			1017.03	8.56055	623.304	189.213
AOS7 1140	1079.32	17208.6	2.466	17.6138	1.54022	0.539656	1.98217	0.0696628	0.720358	0.363418	434.124	3.02427	438.198	7.05459	460.601	40.9662	434.124	3.02427	94.2517			1020.35	14.1108	811.8	156.582
AOS7 48	924.34	9509.35	1.67581	17.5211	3.40915	0.543926	3.53516	0.0697801	0.70443	0.199264	434.831	2.96205	441.01	12.6466	474.369	76.6514	434.831	2.96205	91.665			1022.39	18.1725	916.866	176.37
AOS7 1113	272.228	4800.18	2.87899	18.5155	7.57062	0.498649	7.6859	0.0700254	1.0387	0.135144	436.308	4.38198	410.788	25.9726	270.753	174.799	436.308	4.38198	161.147			1025.44	9.66567	818.406	78.6166
AOS7 1006	855.344	20580	2.51512	18.0794	1.40533	0.534178	1.88922	0.0701138	1.042	0.551552	436.841	4.40108	434.578	6.67925	423.555	35.1665	436.841	4.40108	103.137			1025.65	23.9151	1235.9	487.325
AOS7 20	567.15	5884.38	1.34263	17.4319	3.40623	0.540877	4.38848	0.0703903	0.815829	0.185902	438.506	3.4585	439.003	15.6426	442.55	95.9608	438.506	3.4585	99.0862			1028.75	9.0595	1559.77	114.823
AOS7 556	1057.85	18607.4	3.60109	17.7052	4.0724	0.544784	4.25968	0.0704097	0.739266	0.17355	438.623	3.13474	441.574	15.2544	457.94	93.1079	438.623	3.13474	95.7817			1031.1	5.27399	764.273	198.282
AOS7 922	850.289	8104.46	0.536717	16.7287	1.57948	0.563579	2.35332	0.070496	0.542452	0.230505	439.143	2.30281	453.853	8.61304	530.037	50.1837	439.143	2.30281	82.8514			1031.62	15.0353	884.144	119.502
AOS7 617	386.021	4931.57	0.883678	15.4361	6.2691	0.614457	7.07149	0.0708365	1.10371	0.156079	441.194	4.7066	486.367	27.3345	706.202	148.746	441.194	4.7066	62.4741			1031.87	9.91842	884.553	157.196
AOS7 1187	696.971	7360.66	1.33886	18.0089	3.61591	0.53214	3.87381	0.0709351	1.24787	0.32213	441.787	5.32827	433.229	13.6622	388.937	82.3517	441.787	5.32827	113.588			1037.9	42.1162	201.836	NA
AOS7 940	1040.82	19908.7	1.33242	17.1682	1.03382	0.566205	1.384	0.0710616	0.822862	0.594554	442.548	3.51938	455.557	5.08036	522.666	24.4116	442.548	3.51938	84.6713			1040.99	6.53516	890.249	119.162
AOS7 156	1337.63	14333.9	1.96408	18.001	1.3881	0.549891	1.56202	0.0714242	0.635406	0.406786	444.73	2.73057	444.925	5.62723	446.878	31.7138	444.73	2.73057	99.5195			1042.43	7.3167	942.029	106.43
AOS7 774	802.487	20283.1	1.35854	17.2768	5.39367	0.567023	5.4666	0.0715773	0.865671	0.158356	445.651	3.72754	456.087	20.0876	509.956	118.757	445.651	3.72754	87.3901			1043.44	17.9516	1615.64	277.633
AOS7 387	239.83	2380.97	1.16241	15.3277	9.965	0.587515	11.8535	0.071695	1.34127	0.113154	446.359	5.78433	469.279	44.5716	583.924	256.488	446.359	5.78433	76.4413			1045.77	26.247	1480.65	419.391
AOS7 279	417.662	1096.27	1.29007	14.7348	10.2077	0.541065	10.4557	0.0717093	0.530909	0.0507772	446.445	2.29	439.127	37.2911	401.891	234.476	446.445	2.29	111.086			1049.85	14.7919	896.51	101.112
AOS7 590	547.608	6395.51	1.14878	18.0801	5.59322	0.537162	5.91164	0.0717506	1.40454	0.23759	446.694	6.06157	436.551	20.979	384.358	129.095	446.694	6.06157	116.218			1053.51	10.2238	947.797	52.1358
AOS7 934	579.745	8959.04	1.1829	16.3274	2.66214	0.591051	3.53014	0.0717884	0.533267	0.151061	446.921	2.30254	471.539	13.3164	594.154	75.6576	446.921	2.30254	75.2198			1055.42	10.4097	825.316	99.4514
AOS7 1169	168.023	2548.22	1.54202	14.2056	5.7469	0.657525	6.45843	0.0718683	2.5163	0.389615	447.402	10.8762	513.099	26.0198	818.522	124.373	447.402	10.8762	54.6597			1057.24	9.85442	900.649	61.5153
AOS7 551	1094.91	5048.82	6.43308	18.3924	3.7486	0.524058	4.19503	0.0719577	0.846323	0.201744	447.939	3.6623	427.858	14.6478	322.095	93.3726	447.939	3.6623	139.071			1059.59	60.5495	1493.17	325.128
AOS7 739	603.277	6839.4	3.16155	18.2576	2.74028	0.52535	3.43363	0.0720046	0.961419	0.280001	448.222	4.16289	428.719	12.0083	326.188	74.8218	448.222	4.16289	137.412			1059.66	22.2813	1304.21	406.328
AOS7 219	777.593	10829.9	0.792803	17.7863	4.2912	0.552394	4.45551	0.0721198	0.700913	0.157314	448.914	3.03944	446.564	16.0994	435.424	98.0351	448.914	3.03944	103.098			1061.98	18.5557	1030.37	354.607
AOS7 332	1008.75	11245.1	1.09562	18.0764	4.36589	0.54448	4.76325	0.0722551	0.714427	0.149987	449.728	3.10346	441.374	17.052	398.999	105.597	449.728	3.10346	112.714			1066.28	7.58029	1434.02	373.316
AOS7 688	692.424	8127.49	1.36182	17.6321	6.26865	0.543069	6.55382	0.0722647	0.775059	0.118261	449.785	3.36726	440.446	23.4245	392.887	146.146	449.785	3.36726	114.482			1066.56	7.96703	1399.87	41.7068
AOS7 1020	418.34	6797.18	1.58936	16.9912	5.49187	0.567396	5.68841	0.0722838	1.13361	0.199284	449.9	4.9262	456.329	20.9117	489.798	123.053	449.9	4.9262	91.8542			1067.28	11.7397	864.203	235.027
AOS7 205	292.413	2164.47	2.49464	15.6543	9.55248	0.587467	10.1154	0.0724579	1.65797	0.163905	450.947	7.22104	469.249	38.0272	560.73	217.96	450.947	7.22104	80.4214			1068.21	29.5419	1276.41	425.507
AOS7 497	465.386	6064.1	2.20204	16.7585	3.70079	0.575329	5.65602	0.0725191	1.12999	0.199786	451.315	4.92539	461.455	20.9772	513.217	121.869	451.315	4.92539	87.9384			1068.24	15.6545	837.647	159.364
AOS7 1001	206.895	2755.99	1.02018	14.8685	7.3936	0.632567	7.76634	0.0727018	1.27961	0.164764	452.412	5.59065	497.694	30.5642	712.701	162.999	452.412	5.59065	63.4786			1073.32	6.90018	947.15	75.9288
AOS7 210	1085.05	6517.61	2.2389	18.2928	3.3121	0.538539	3.84859	0.0729396	0.720728	0.187271	453.841	3.15848	437.461	13.6794	353.122	85.4354	453.841	3.15848	128.523			1073.67	11.3174	1039.33	248.78
AOS7 384	367.653	3972.62	2.39599	15.2484	10.8537	0.626346	11.6554	0.0729879	1.20164	0.103097	454.132	5.26923	493.817	45.6091	683.277	248.343	454.132	5.26923	66.4639			1074.22	8.36929	929.49	81.836
AOS7 834	154.656	1567.94	1.72996	12.4202	0.551256	0.72129	8.69374	0.0731184	4.03859	0.464541	454.916	17.739	551.428	37.0071	973.925	157.175	454.916	17.739	46.7096			1074.66	16.6225	748.351	226.307
AOS7 750	437.365	7019.94	2.18628	16.0215	2.29096	0.619566	3.0728	0.0731713	1.0884	0.354206	455.234	4.78387	489.575	11.9364	654.57	61.6432	455.234	4.78387	69.547			1074.99	11.4458	1198.49	112.955
AOS7 898	168.652	2094.14	2.09039	17.3855	14.1063	0.517822	14.6672	0.0732557	2.2638	0.154345	455.74	9.96083	423.695	50.8509	253.835	NA	455.74	9.96083	179.542			1076.71	26.1236	735.219	254.692
AOS7 604	457.72	6692.01	2.11541	17.3793	6.14603	0.574018	7.01811	0.0733337	0.720536	0.102668	456.209	3.17353	460.61	25.9933	483.602	154.352	456.209	3.17353	94.3356			1078.89	19.6653	963.877	302.162
AOS7 295	697.811	12996	1.56374	17.2246	3.4991	0.594078	3.61321	0.0734899	0.703254	0.194634	457.147	3.10356	473.468	13.6736	554.307	77.3682	457.147	3.10356	82.4717			1079.38	11.0634	935.726	74.0925
AOS7 994	734.961	12112.3	1.32815	17.3474	4.31744	0.603361	4.87304	0.0735634	0.866014	0.177715	457.588	3.8254	479.365	18.6219	585.893	104.106	457.588	3.8254	78.101			1080.23	17.8103	897.027	124.001
AOS7 472	763.111	13347.3	1.2473	16.6928	2.14002	0.602626	2.58103	0.0736707	0.963131	0.373158	458.233	4.26017	478.899	9.85488	580.039	52.0255	458.233	4.26017	79.0003			1080.58	37.8498	1309.41	265.194
AOS7 351	1122.43	8796.02	3.01914	17.2667	2.37415	0.583763	2.69897	0.0736722	0.787128	0.291641	458.241	3.48173	466.877	10.1016	510.516	56.7555	458.241	3.48173	89.7604			1081.03	6.79396	1059.33	52.3268
AOS7 684	788.217	14053.3	3.74584	18.2751	2.94228	0.53898	3.25706	0.0738992	0.882335	0.270899	459.605	3.91407	437.752	11.5828	325.371	71.1911	459.605	3.91407	141.256			1083.91	11.0134	909.231	110.959
AOS7 546	476.802	6783.34	1.4239	17.2512	8.03246	0.584844	8.88359	0.0740465	1.87761	0.211357	460.488	8.3446	467.57	33.2987	503.448	191.417	460.488	8.3446	91.467			1086.6	64.8192	702.519	261.961
AOS7 1	760.44	9099.64	0.805392	18.9629	2.80689	0.541931	3.21383	0.0744055	0.787665	0.245086	462.643	3.51639	439.697	11.4697	322.288	70.7714	462.643	3.51639	143.549			1088.56	21.1271	717.897	406.442
AOS7 30	511.25	6676.86	1.85705	17.745	6.70498	0.559049	7.32644	0.0745654	0.889678	0.121434	463.603	3.97975	450.907	26.6817	387.628	163.494	463.603	3.97975	119.6			1088.79	9.56823	901.678	178.162
AOS7 439	567.425	6288.4	0.979683	18.1495	3.7359	0.541244	4.37855	0.0746938	0.941038	0.21492	464.372	4.21624	439.245	15.6141	310.613	97.3572	464.372	4.21624	149.502			1089.21	13.1707	1518.25	53.5688
AOS7 428	368.263	3115.12	1.41269	18.9032	2.75899	0.512161	3.19236	0.0748896	0.966307	0.302694	465.547	4.34001	419.901	10.9791	177.294	70.9537	465.547	4.34001	262.585			1094.94	8.68135	981.609	98.3955
AOS7 443	865.883	13001.7	1.865	17.0104	4.39009	0.595224	4.44155	0.0751688	0.630994	0.142066	467.221	2.84384	474.198	16.8292	509.032	96.7079	467.221	2.84384	91.7862			1096.62	11.5396	964.683	173.9
AOS7 512	429.001	15099	5.73961	17.6525	4.88128	0.583669	5.13195	0.0755117	0.943353	0.18382	469.277	4.26964	466.817	19.2073	455.68	112.021	469.277	4.26964	102.984			1096.76	10.8038	924.776	187.311
AOS7 249	423.86	4862.74	0.892056	17.0556	1.6572	0.591272	2.59899	0.0755743	0.723231	0.278274	469.652	3.27589	471.68	9.80597	482.539	55.1447	469.652	3.27589	97.3293			1096.87	21.263	1416.95	834.24
AOS7 694	1113.13	20681.9	1.81844	17.8035	3.03537	0.579081	3.27719	0.0756188	1.15194	0.351502	469.918	5.22059	463.87	12.2036	434.987	68.3392	469.918	5.22059	108.03			1097.47	8.98474	952.972	91.2199
AOS7 605	632.693	4657.2	1.18911	13.7109	11.5424	0.747067	11.8643	0.0756326	1.16889	0.0985215	470.001	5.29829	566.521	51.5578	976.59	241.431	470.001	5.29829	48.1268			1099.75	11.3865	953.012	48.6188
AOS7 422	814.574	7189.89	1.41815	17.7207	2.87504	0.590263	3.20103	0.0765052	0.755889	0.236139	475.229	3.46299	471.036	12.0647	451.603	69.085	475.229	3.46299	105.232			1099.79	18.6508	978.332	119.928
AOS7 307	598.084	6581.38	0.934424	17.4282	3.92839	0.617074	4.10431	0.0766656	0.664212	0.161833	476.189	3.04891	488.012	15.9042	544.858	88.5418	476.189	3.04891	87.3968			1100.26	7.83372	975.124	54.9516
AOS7 845	285.08	2736.37	3.58744	17.0153	9.55642	0.569342	10.118	0.0767431	0.818034	0.0808491	476.654	3.75852	457.589	37.2887	363.907	227.897	476.654	3.75852	130.982			1100.52	7.16447	993.606	89.6914
AOS7 897	219.866	3114.75	0.996082	15.1636	7.63998	0.658717	10.8185	0.0767947	1.44159	0.133253	476.962	6.62762	513.829	43.6505	682.274	229.613	476.962	6.62762	69.9077			1101.37	18.4502	731.64	399.721
AOS7 264	355.923	9790.69	1.72359	14.1322	3.46119	0.742935	3.80606	0.0772122	1.26781	0.333103	479.461	5.85811	564.117	16.4746	922.956	73.753	479.461	5.85811	51.9484			1101.62	64.5448	1126.71	366.551
AOS7 338	566.148	7488.36	7.23691	18.209	2.1753	0.574151	2.93703	0.0773841	0.661315	0.225165	480.49	3.06202	460.696	10.8776	364.119	64.5126	480.49	3.06202	131.96			1101.72	7.21071	959.393	67.3365
AOS7 373	338.777	4152.48	2.1483	17.2286	8.54712	0.587208	9.8599	0.0774085	1.57671	0.159911	480.635	7.3026	469.083	37.0555	413.893	218.017	480.635	7.3026	116.126			1102.62	8.37268	968.432	133.676
AOS7 400	847.586	7990.97	11.0021	17.0183	1.66248	0.61944	2.01602	0.0775733	0.916367	0.454542	481.622	4.25258	489.496	7.83011	527.495	39.3681	481.622	4.25258	91.3036			1103.42	11.5864	959.137	144.279
AOS7 1025	525.645	5895.76	1.52711	16.9425	2.59164	0.607356	3.51017	0.077591	1.54243	0.439419	481.727	7.15949	481.891	13.4684	483.655	69.6538	481.727	7.15949	99.6015			1103.92	13.605	745.062	217.87
AOS7 573	380.385	3668	2.95663	16.1418	9.84334	0.614294	11.5929	0.0776765	0.81093	0.0699506	482.239	3.76793	486.265	44.8226	506.26	255.133	482.239	3.76793	95.2553			1104.55	11.7994	974.228	35.2443
AOS7 942	709.702	9789.7	0.999653	17.0803	1.76574	0.614037	2.59669	0.0776796	0.964514	0.37144	482.258	4.48172	486.103	10.031	505.248	53.0582	482.258	4.48172	95.4496			1107.14	187.204	1022.77	25.0216
AOS7 487	212.117	2716.83	0.957008	15.8195	11.7315	0.633259	13.2005	0.0783503	2.24923	0.17039	486.268	10.535	498.124	52.0147	553.932	284.883	486.268	10.535	87.7849			1109.85	13.5108	797.756	284.533
AOS7 568	329.906	3871.54	32.1876	16.5914	7.62251	0.61023	9.0255	0.0784105	1.36301	0.151018	486.628	6.38863	483.705	34.7437	470.861	197.789	486.628	6.38863	103.349			1111.53	9.01587	1142.76	82.9573
AOS7 480	1042.15	3652.69	3.24059	12.5312	2.36369	0.831798	9.09552	0.0786671	8.07763	0.888089	488.162	37.9763	614.609	41.9609	1113.92	83.5216	488.162	37.9763	43.8239			1111.82	6.73998	977.5	26.9495
AOS7 1084	433.682	6096.59	0.817947	16.2422	8.269	0.63931	8.6025	0.0788289	0.659924	0.076713	489.129	3.10846	501.879	34.0775	561.366	187.224	489.129	3.10846	87.132			1112.61	12.4904	908.821	213.267
AOS7 561	538.359	8436.7	2.82355	16.7574	3.78494	0.630262	4.16222	0.0790045	0.701361	0.168506	490.178	3.31046	496.259	16.3402	525.344	89.9886	490.178	3.31046	93.3061			1113.64	8.11539	1006.82	103.656
AOS7 306	266.645	3691.8	1.69892	18.1764	9.08217	0.584658	9.41048	0.0790636	0.795126	0.0844936	490.531	3.75563	467.451	35.2682	356.593	212.139	490.531	3.75563	137.56			1116.82	11.7823	1015.02	42.4143
AOS7 86	756.131	2311.14	0.223549	11.06	2.3594	0.911468	4.45918	0.079108	2.62565	0.588819	490.796	12.4083	657.838	21.5936	1283.26	70.2198	490.796	12.4083	38.2462			1117.58	13.7552	996.455	139.304
AOS7 80	259.783	5184.57	1.53454	16.2881	8.32721	0.637909	9.01697	0.0791315	0.661312	0.0733408	490.937	3.12608	501.011	35.6729	548.263	196.764	490.937	3.12608	89.5441			1121.38	8.06774	1008.41	35.7639
AOS7 1142	339.921	3344.04	1.4436	16.497	5.87886	0.617914	7.35608	0.0792851	0.634621	0.0862717	491.854	3.0053	488.539	28.534	473.963	162.311	491.854	3.0053	103.775			1121.57	11.5712	886.019	161.635
AOS7 659	447.163	7161.76	0.959526	17.1955	6.45796	0.621806	7.1674	0.0799856	0.549576	0.0766771	496.037	2.62386	490.979	27.9098	468.432	158.423	496.037	2.62386	105.893			1122.75	8.83325	993.275	97.68
AOS7 39	457.377	6498.45	1.0897	16.9513	9.55853	0.635248	9.69227	0.0801211	0.655753	0.0676573	496.845	3.13569	499.36	38.249	511.876	212.965	496.845	3.13569	97.0636			1124.25	8.87665	1461.29	38.98
AOS7 526	830.462	7846.38	1.31033	17.2862	4.05589	0.621872	4.44599	0.0806363	0.792372	0.178222	499.92	3.81152	491.02	17.3111	450.662	97.2009	499.92	3.81152	110.93			1126.92	13.243	979.495	133.017
AOS7 49	346.052	4238.63	2.24315	16.5738	4.93566	0.656274	5.37917	0.0815603	1.01886	0.189408	505.429	4.9529	512.332	21.6453	544.206	115.51	505.429	4.9529	92.8746			1127.17	8.25833	1665.62	401.356
AOS7 710	1150.68	6743.63	1.3879	15.1995	1.08728	0.712955	2.64149	0.0817588	2.24099	0.848382	506.612	10.9185	546.499	11.1638	717.383	29.6948	506.612	10.9185	70.6195			1128.11	11.1576	1252.43	301.848
AOS7 708	981.173	26364.2	1.08622	16.4745	1.65758	0.675416	2.03952	0.0819648	1.07966	0.52937	507.84	5.27253	524	8.34865	595.999	37.5104	507.84	5.27253	85.2081			1134.69	18.379	944.878	165.494
AOS7 868	297.784	4439.3	1.15373	14.3249	15.6217	0.757046	15.8533	0.0821905	0.946648	0.0597131	509.184	4.63473	572.304	69.4649	832.572	331.828	509.184	4.63473	61.158			1142.48	14.0857	829.946	99.4095
AOS7 1119	229.489	2538.1	0.848207	14.435	8.74413	0.730634	10.2616	0.0822119	1.16063	0.113104	509.312	5.68372	556.925	44.0162	757.528	215.592	509.312	5.68372	67.2334			1142.71	8.03347	1184.86	102.635
AOS7 58	520.903	4524.36	2.63632	15.7402	5.31619	0.697292	5.66302	0.0824895	1.56684	0.276679	510.966	7.69693	537.172	23.6273	650.965	116.884	510.966	7.69693	78.4936			1143.3	8.59141	1444.31	26.3345
AOS7 982	280.807	3902.04	2.16235	17.8102	7.8156	0.599181	7.94641	0.0827008	1.01	0.127102	512.223	4.97327	476.714	30.2405	310.277	179.658	512.223	4.97327	165.086			1146.67	10.0605	978.38	145.956
AOS7 1118	502.715	8150.26	1.95142	18.0878	3.60259	0.619423	3.93761	0.0830781	0.715838	0.181795	514.469	3.53964	489.486	15.294	375.148	87.1628	514.469	3.53964	137.138			1148.55	9.56179	987.527	167.573
AOS7 572	221.03	2559.56	1.64193	15.9817	5.12029	0.645801	8.88979	0.083135	1.94456	0.218741	514.808	9.62146	505.891	35.4339	466.718	192.439	514.808	9.62146	110.304			1152.01	16.9529	960.349	252.501
AOS7 495	784.384	3778.47	0.715501	14.6867	1.14233	0.740927	5.20322	0.0832187	1.12991	0.217155	515.306	5.59584	562.946	22.4889	761.363	107.146	515.306	5.59584	67.682			1157.37	14.1481	1274.91	109.242
AOS7 858	497.274	4901.87	1.79734	16.9096	6.15807	0.644575	6.9601	0.083308	1.3383	0.192281	515.838	6.63446	505.135	27.706	457.924	151.654	515.838	6.63446	112.647			1163.5	8.33381	1132.89	237.264
AOS7 706	1209	13564.9	0.594446	16.8828	0.787994	0.664419	1.28302	0.0834495	0.847137	0.660267	516.68	4.20617	517.313	5.20052	521.047	21.1387	516.68	4.20617	99.1618			1165.05	8.33986	1029.62	65.449
AOS7 938	203.546	2556.37	1.03043	14.1302	16.8157	0.756465	18.1117	0.0840111	1.26537	0.069865	520.02	6.32178	571.969	79.3635	785.096	382.382	520.02	6.32178	66.2365			1165.71	8.4997	1055.63	34.0138
AOS7 475	123.342	1361.49	1.24004	13.2025	12.9519	0.768872	17.0647	0.0844931	1.2161	0.0712639	522.886	6.10775	579.116	75.4545	807.206	358.673	522.886	6.10775	64.7773			1166.78	15.806	802.654	126.164
AOS7 388	404.754	6141.09	0.356351	15.0753	5.90414	0.765068	6.2084	0.0852063	1.08369	0.174553	527.124	5.48509	576.93	27.3308	779.173	128.606	527.124	5.48509	67.6517			1168.98	11.5777	915.3	171.89
AOS7 757	420.944	11559	0.886028	16.6485	4.84242	0.704949	5.02564	0.0855506	0.567499	0.112921	529.169	2.88308	541.742	21.1023	595.966	108.239	529.169	2.88308	88.7918			1171.32	23.1654	1205.36	280.032
AOS7 187	258.521	3221.31	1.70784	15.9976	9.10511	0.724104	9.62711	0.0865095	1.06402	0.110523	534.861	5.46131	553.087	41.0772	629.773	206.58	534.861	5.46131	84.9291			1177.56	14.4677	1058.95	63.9151
AOS7 398	184.195	2422.15	1.38348	13.0719	9.55902	0.869279	10.1789	0.0867259	2.57296	0.252774	536.145	13.2367	635.176	48.0994	1006.35	200.264	536.145	13.2367	53.2763			1180.66	7.72928	1188.32	24.8169
AOS7 1047	301.603	11756.1	1.50868	15.6352	8.68596	0.768283	10.0146	0.0878293	4.77135	0.476439	542.687	24.8336	578.778	44.2087	724.001	187.11	542.687	24.8336	74.9566			1183	7.94694	1027.12	157.601
AOS7 744	227.311	3005.86	1.09402	12.7595	29.3477	0.905912	29.4011	0.0880483	0.853976	0.0290457	543.984	4.45489	654.882	142.833	1059.22	604.338	543.984	4.45489	51.3571			1184.93	24.9014	1881.81	15.6887
AOS7 1008	1531.67	23153.9	13.8279	16.386	3.45189	0.739341	3.64497	0.0882803	1.00788	0.276514	545.359	5.2705	562.021	15.7332	631.023	75.4859	545.359	5.2705	86.4246			1192.69	9.69132	1062.9	90.0165
AOS7 810	591.817	6076.21	1.88631	16.4859	3.36599	0.717929	3.48399	0.0885755	0.758284	0.217648	547.107	3.97745	549.444	14.7848	560.104	74.1424	547.107	3.97745	97.6795			1194.39	17.0952	1004.67	149.474
AOS7 749	91.5525	2629.49	1.42283	15.7725	5.55211	0.73108	6.45072	0.0887959	1.19978	0.185992	548.412	6.30763	557.187	27.669	594.158	137.496	548.412	6.30763	92.3006			1196.22	14.72	968.536	179.237
AOS7 256	317.867	6618.22	0.913432	15.7789	11.2193	0.768985	11.803	0.089556	1.66341	0.140931	552.91	8.81379	579.181	52.1431	684.558	250.268	552.91	8.81379	80.7689			1196.81	7.48077	1062.86	174.365
AOS7 283	862.32	13452.1	1.36941	17.0858	3.10447	0.710886	3.35911	0.0895931	0.684887	0.203889	553.13	3.63034	545.272	14.173	513.517	72.2884	553.13	3.63034	107.714			1199.12	16.8322	1037.06	128.703
AOS7 1086	278.374	919.846	2.49872	13.3585	6.28589	0.725615	8.24589	0.0896068	1.44169	0.174837	553.211	7.64296	553.976	35.2212	558.076	177.29	553.211	7.64296	99.1283			1210.06	14.2718	1084.66	108.829
AOS7 145	1316.42	6078.39	3.40522	16.8092	2.5005	0.731375	3.08378	0.0912669	0.685891	0.222419	563.026	3.69791	557.36	13.2278	535.228	65.8236	563.026	3.69791	105.194			1211.38	25.4515	1351.29	373.516
AOS7 576	389.51	3743.3	0.592535	16.1988	5.19694	0.726488	7.46776	0.0919989	4.26199	0.570718	567.348	23.1469	554.49	31.9174	502.986	135.101	567.348	23.1469	112.796			1212.29	8.05514	1052.91	315.276
AOS7 1058	1861.36	17566.7	1.50298	13.959	1.30301	0.912459	1.88214	0.0921925	1.18963	0.632061	568.491	6.47331	658.364	9.11834	980.638	29.7044	568.491	6.47331	57.9716			1214.5	16.534	1063.16	74.4066
AOS7 53	1323.91	18933.9	2.41713	16.9995	1.135	0.760632	1.70267	0.0927094	0.63923	0.375428	571.541	3.49619	574.375	7.4692	586.569	34.2388	571.541	3.49619	97.4379			1215.14	30.4831	1023.56	55.495
AOS7 557	698.031	12238.5	3.77112	17.2869	2.99624	0.726668	3.23403	0.0931102	0.817697	0.252842	573.905	4.48998	554.595	13.8206	477.037	69.1904	573.905	4.48998	120.306			1223.93	9.76223	1023.94	117.439
AOS7 853	220.998	4163.45	2.08697	16.5958	5.39003	0.73306	6.83866	0.0931895	1.81856	0.265924	574.373	9.99353	558.347	29.3797	494.505	145.463	574.373	9.99353	116.151			1234.02	22.6571	1127.5	NA
AOS7 287	514.763	10433	0.729791	16.3463	4.99649	0.769871	5.27997	0.0934008	1.16973	0.221541	575.619	6.44133	579.689	23.3246	596.594	111.614	575.619	6.44133	96.4842			1239.04	12.526	1594.92	10.7336
AOS7 815	726.389	12649.4	3.7061	17.242	3.26129	0.734745	3.67716	0.0934938	0.815208	0.221695	576.167	4.49318	559.335	15.8154	492.36	79.088	576.167	4.49318	117.022			1239.73	18.3327	1354.69	364.279
AOS7 76	329.957	8559.29	12.8179	18.0801	3.83136	0.691304	4.4798	0.0939446	1.06776	0.238349	578.824	5.91108	533.584	18.5945	345.535	98.463	578.824	5.91108	167.515			1244.57	12.1571	1283.16	410.561
AOS7 185	271.016	4771.38	1.38531	17.44	3.79132	0.736589	4.24895	0.0940301	0.92526	0.217762	579.328	5.12648	560.413	18.3015	485.308	91.5917	579.328	5.12648	119.373			1247.8	7.787	1104.58	102.759
AOS7 227	428.534	5815.47	3.0584	16.2125	4.62933	0.786736	5.90195	0.0940847	0.896796	0.151949	579.649	4.97141	589.319	26.3932	627.653	125.792	579.649	4.97141	92.3519			1249.07	15.6392	1814.89	27.2979
AOS7 990	290.527	6500.79	1.06056	17.419	4.18101	0.745847	5.68569	0.0941232	1.01546	0.178599	579.877	5.63132	565.812	24.6684	510.621	123.075	579.877	5.63132	113.563			1256.79	15.586	1672.23	26.3012
AOS7 311	721.433	18245.1	2.03096	16.8952	3.53686	0.79712	3.60369	0.0942382	0.666414	0.184925	580.554	3.6998	595.203	16.2316	652.375	76.032	580.554	3.6998	88.9908			1261.47	31.5795	1647.31	38.1414
AOS7 269	104.223	1824.94	1.83294	13.1381	9.28232	0.893257	13.2588	0.0942911	4.51135	0.340253	580.865	25.0591	648.118	63.6017	890.893	258.427	580.865	25.0591	65.2003			1264.7	24.0629	1313.44	481.258
AOS7 1074	341.677	15564.8	4.98741	16.6578	7.78196	0.779882	7.91837	0.0948914	1.27982	0.161627	584.401	7.15031	585.416	35.2434	590.297	169.696	584.401	7.15031	99.0012			1269.41	9.07745	1648.46	230.119
AOS7 1027	487.095	14849.5	2.25799	16.5411	4.61015	0.79259	4.97046	0.0962773	1.41592	0.284866	592.555	8.01604	592.64	22.3185	593.927	103.301	592.555	8.01604	99.769			1269.52	11.3691	1057.76	127.048
AOS7 736	86.0013	1597.27	0.919422	13.2215	15.6772	0.880074	18.9363	0.096287	3.74701	0.197874	592.613	21.2152	641.023	90.2424	816.487	391.08	592.613	21.2152	72.5808			1269.74	13.1791	1208.39	207.99
AOS7 1067	771.54	19716	0.96711	16.5286	6.40826	0.822637	6.49821	0.0965754	0.854179	0.131448	594.308	4.84948	609.519	29.789	667.406	138.026	594.308	4.84948	89.0474			1271.17	22.9158	1602.65	71.8647
AOS7 1060	469.26	6104.98	1.3053	14.5391	3.59909	0.898537	3.97863	0.0967967	0.819657	0.206015	595.609	4.66321	650.945	19.1219	848.719	80.9743	595.609	4.66321	70.1774			1274.89	6.43641	1112.75	48.2154
AOS7 284	305.268	4473.29	0.91853	15.0401	7.78956	0.847219	8.04978	0.0971346	1.06968	0.132884	597.595	6.10503	623.122	37.5049	717.844	169.645	597.595	6.10503	83.2486			1278.06	7.88944	1606.92	192.063
AOS7 965	1315.87	17682	2.27915	16.6327	1.12772	0.801143	1.38897	0.0986917	0.779184	0.560981	606.737	4.51194	597.473	6.2732	563.392	25.0431	606.737	4.51194	107.694			1282.64	22.246	1093.87	83.8276
AOS7 558	350.623	4608.53	1.29919	15.8504	1.64489	0.830791	3.0219	0.100676	0.973962	0.322302	618.372	5.74287	614.051	13.9248	599.071	61.935	618.372	5.74287	103.222			1282.9	14.0851	1079.28	25.8648
AOS7 393	339.824	6687.51	0.34481	15.8873	2.85809	0.865104	4.22201	0.100746	0.961942	0.22784	618.782	5.67558	632.905	19.887	684.629	87.7991	618.782	5.67558	90.3821			1283.05	9.85786	977.886	310.569
AOS7 596	361.46	6123.54	3.17387	15.7454	9.39811	0.871244	9.63496	0.100912	1.16202	0.120605	619.752	6.86632	636.243	45.5807	696.19	204.234	619.752	6.86632	89.0205			1287.09	21.3037	1180.36	279.018
AOS7 542	334.207	3416.11	1.09016	16.0494	3.90696	0.825666	6.10016	0.101111	1.13365	0.18584	620.916	6.71065	611.204	28.0198	576.301	130.396	620.916	6.71065	107.741			1291.22	19.0076	2653.43	18.9966
AOS7 517	418.051	8652.49	1.14395	15.4231	5.13122	0.890808	5.29447	0.101574	1.09093	0.20605	623.628	6.48461	646.803	25.3325	729.502	109.884	623.628	6.48461	85.4869			1298.93	65.0501	1715.51	33.6095
AOS7 957	955.111	33685	1.7735	16.8155	1.37327	0.843198	1.64534	0.102396	0.654107	0.397552	628.437	3.91665	620.909	7.64276	594.49	32.7181	628.437	3.91665	105.71			1302.22	11.2594	1171.29	64.3064
AOS7 983	334.219	7451.92	0.693749	15.3083	2.30382	0.904258	3.39067	0.102622	1.53267	0.452024	629.756	9.19559	654.001	16.3501	739.47	64.0035	629.756	9.19559	85.163			1302.96	11.0248	1552.21	529.748
AOS7 843	221.177	3350.61	2.64768	15.2957	9.91905	0.872954	11.2671	0.102967	1.27794	0.113423	631.773	7.6907	637.17	53.3711	657.269	240.755	631.773	7.6907	96.1209			1304.91	13.9415	1686.77	49.2775
AOS7 158	882.74	17682.8	4.86224	16.5571	2.51552	0.866157	2.87305	0.1031	1.02283	0.35601	632.548	6.16262	633.478	13.5409	637.759	57.7697	632.548	6.16262	99.1829			1308.16	9.39298	941.221	102.143
AOS7 310	368.976	5858.28	1.10708	16.5813	4.27427	0.868846	4.82573	0.103716	1.33788	0.277239	636.151	8.10447	634.941	22.7843	631.59	99.9268	636.151	8.10447	100.722			1312.74	29.6417	1812.62	48.2316
AOS7 144	614.022	8589.83	1.62697	16.5935	3.65483	0.851061	3.86885	0.103784	0.753164	0.194674	636.545	4.56513	625.231	18.0633	585.472	82.3965	636.545	4.56513	108.723			1316.45	16.5511	2487.85	92.0509
AOS7 318	860.628	7218.93	2.48024	15.7886	2.13657	0.898875	2.79082	0.104257	0.725813	0.260072	639.308	4.41752	651.126	13.415	693.214	57.4384	639.308	4.41752	92.2238			1321.05	12.0794	1184.29	180.504
AOS7 981	123.573	2169.27	1.7799	14.7665	4.19473	0.895877	4.83071	0.106122	2.05402	0.425201	650.189	12.7036	649.522	23.1822	648.159	93.9261	650.189	12.7036	100.313			1321.14	8.83634	1767.2	32.8013
AOS7 175	555.498	13707.8	0.6991	16.2121	3.39397	0.902913	3.7308	0.106388	0.662277	0.177516	651.739	4.10529	653.283	17.9765	659.575	78.7181	651.739	4.10529	98.8119			1327.66	16.8841	1201.69	142.581
AOS7 1018	931.693	27175.7	16.6137	15.8872	2.37013	0.943794	2.6763	0.109319	0.960518	0.358897	668.793	6.10189	674.866	13.1952	696.118	53.2166	668.793	6.10189	96.0748			1331.63	12.0049	1692.7	48.1415
AOS7 1153	281.475	4660.26	3.06951	14.9802	4.6902	1.00295	4.90987	0.113844	0.893308	0.181941	695.035	5.88581	705.308	24.9688	739.064	102.212	695.035	5.88581	94.0426			1333.55	11.8214	1151.16	148.517
AOS7 1181	432.768	20450.9	1.6598	15.9393	5.30257	0.993222	5.65503	0.114282	1.86419	0.329652	697.568	12.3251	700.363	28.62	710.285	113.576	697.568	12.3251	98.2096			1337.7	8.98811	1166.79	28.039
AOS7 159	886.057	15446.5	146.052	15.7409	1.5168	1.02093	1.95664	0.115665	0.538599	0.275267	705.567	3.59959	714.382	10.0369	743.078	39.768	705.567	3.59959	94.9519			1341.57	14.6135	1734.94	44.2319
AOS7 552	1083.63	18153.9	1.44586	15.7443	1.41929	1.08191	1.6247	0.122842	0.714409	0.439718	746.902	5.03842	744.565	8.57318	738.447	30.8804	746.902	5.03842	101.145			1342.23	34.6713	1951.69	339.096
AOS7 409	278.41	8410.02	1.19322	15.7196	6.2774	1.08486	6.62532	0.122949	2.05121	0.309601	747.517	14.4775	746.002	35.0191	742.357	133.354	747.517	14.4775	100.695			1353	7.15909	1458.96	130.137
AOS7 194	987.36	17398.5	1.08284	15.2096	1.67264	1.18327	2.00727	0.125344	0.901861	0.449298	761.249	6.47554	792.835	11.0466	883.633	37.0862	761.249	6.47554	86.1499			1354.14	20.5377	904.873	248.621
AOS7 1032	181.991	5667.55	0.862377	14.1424	5.30409	1.22918	6.36366	0.130255	1.59314	0.25035	789.317	11.8356	813.964	35.6439	882.877	127.521	789.317	11.8356	89.4029			1354.45	11.217	1183.72	126.582
AOS7 138	353.536	5528.39	3.07145	13.8218	3.78117	1.27235	6.96888	0.130424	5.36929	0.770468	790.283	39.9353	833.439	39.6409	951.192	90.94	790.283	39.9353	83.0834			1361.08	24.1481	1634.11	252.701
AOS7 162	260.804	5467.23	1.9775	14.3909	2.4973	1.23103	4.68022	0.130578	1.62869	0.347995	791.16	12.1262	814.808	26.2274	880.831	90.8247	791.16	12.1262	89.8197			1366.97	9.88176	1095.05	120.004
AOS7 14	277.075	4852.31	1.65817	14.6575	3.82507	1.2611	4.57071	0.137578	0.747102	0.163454	830.951	5.82459	828.403	25.8903	822.499	94.1865	830.951	5.82459	101.028			1381.81	19.5634	885.453	361.21
AOS7 421	417.802	10100.8	2.02518	14.4495	3.19846	1.33281	3.88462	0.138638	0.99777	0.256851	836.958	7.83152	860.105	22.5392	921.16	77.1984	836.958	7.83152	90.8591			1389.84	12.9336	1163	70.7127
AOS7 189	201.708	4007.08	1.50221	14.4429	1.3052	1.33513	2.85805	0.14058	0.89973	0.314806	847.94	7.14871	861.113	16.594	896.095	56	847.94	7.14871	94.6262			1391.33	9.42596	1243.37	91.8117
AOS7 600	1527.98	26298.2	3.10269	14.7361	0.793751	1.39746	1.30243	0.146831	0.757832	0.581858	883.176	6.25475	887.861	7.70872	900.431	21.8459	883.176	6.25475	98.0837			1395.63	49.2689	1115.34	351.591
AOS7 772	297.92	8951.83	0.520545	14.1616	5.98447	1.55393	6.17172	0.163061	0.954192	0.154607	973.765	8.62386	952.057	38.1472	903.09	125.804	903.09	125.804	107.826			1398.77	20.5401	1154.03	19.8443
AOS7 714	377.197	8040.54	1.32261	13.964	4.74937	1.45899	5.2619	0.152715	0.872136	0.165745	916.167	7.4484	913.592	31.711	908.254	106.952	908.254	106.952	100.871			1414.76	20.7459	1848.57	23.6922
AOS7 1126	647.036	10951.6	2.4158	14.3097	2.14534	1.52301	2.34406	0.158925	0.621424	0.265106	950.799	5.49342	939.688	14.3685	914.649	46.5329	914.649	46.5329	103.952			1416.52	19.3519	1250.08	81.2366
AOS7 1117	154.651	6065.95	1.98153	14.0873	2.3056	1.59392	3.44003	0.166201	1.03311	0.300319	991.145	9.49125	967.833	21.4668	916.176	67.5193	916.176	67.5193	108.183			1447.96	25.6726	1478.9	201.539
AOS7 795	297.39	9077.88	2.62374	14.2586	2.38302	1.48838	2.53873	0.154671	0.841652	0.331526	927.093	7.26777	925.656	15.4197	923.15	49.2271	923.15	49.2271	100.427			1455.71	15.3949	1827.34	20.7148
AOS7 1194	43.8291	1819.69	2.88176	12.802	6.83298	1.54562	9.33851	0.160344	5.04061	0.539767	958.689	44.903	948.746	57.6345	926.646	161.697	926.646	161.697	103.458			1475.15	17.94	2201.43	23.7899
AOS7 878	789.236	33183.8	5.5456	14.3544	1.07865	1.46717	1.40866	0.150917	0.717771	0.509542	906.103	6.06735	916.963	8.50603	944.064	24.8092	944.064	24.8092	95.979			1480.2	11.8932	1298.99	29.4292
AOS7 972	411.63	17166.1	5.43912	14.0033	2.54479	1.62746	2.72118	0.166819	0.816776	0.300155	994.562	7.52773	980.878	17.116	951.245	53.1186	951.245	53.1186	104.554			1488.58	16.0276	2659.27	25.2854
AOS7 871	2256.39	170486	83.4836	14.2067	0.680257	1.41629	0.948484	0.145046	0.658172	0.693919	873.135	5.37454	895.803	5.64504	953.032	13.9803	953.032	13.9803	91.6165			1490.4	12.7138	1347.51	48.7081
AOS7 672	361.217	7983.77	2.50983	13.5253	7.5144	1.41754	7.70407	0.144944	0.835787	0.108486	872.56	6.82072	896.33	45.8994	956.284	156.815	956.284	156.815	91.2449			1498.62	23.8523	1885.76	26.561
AOS7 841	327.176	15165.3	2.75511	14.0027	4.59205	1.72568	4.77486	0.176368	0.856916	0.179464	1047.1	8.28197	1018.14	30.705	957.252	96.0717	957.252	96.0717	109.386			1498.75	11.3777	1920.78	159.2
AOS7 696	1123.96	22044.7	4.98153	13.8582	0.851849	1.70858	1.23358	0.174326	0.772777	0.626453	1035.9	7.39513	1011.75	7.9013	960.745	19.6266	960.745	19.6266	107.823			1501.44	18.3997	2653.12	132.003
AOS7 936	451.134	35781.1	2.32794	14.0009	2.70498	1.67643	2.75808	0.170945	0.512525	0.185827	1017.32	4.8234	999.626	17.5432	961.933	55.3684	961.933	55.3684	105.758			1523.44	8.37017	1347.56	46.301
AOS7 250	188.002	3562.83	0.548152	13.5236	5.74786	1.58063	6.01334	0.161067	1.00352	0.166883	962.704	8.9742	962.618	37.4151	963.329	121.171	963.329	121.171	99.9352			1526.53	15.6126	1282.51	401.58
AOS7 779	217.909	7444.19	1.11977	13.7349	5.31596	1.43492	5.5914	0.146065	1.20306	0.215162	878.868	9.88422	903.602	33.4696	965.475	111.564	965.475	111.564	91.0295			1545.67	14.5594	1374.54	51.2323
AOS7 528	208.002	7427.44	2.24232	13.7327	6.93178	1.70628	7.01662	0.172926	0.66508	0.0947863	1028.21	6.32095	1010.89	44.9489	974.419	142.594	974.419	142.594	105.521			1605.56	21.3945	1390.21	24.6081
AOS7 273	764.214	27706.7	2.70368	13.9106	2.12264	1.70257	2.23272	0.172417	0.529002	0.236932	1025.41	5.01503	1009.5	14.2831	976.025	44.1991	976.025	44.1991	105.06			1666	39.3338	2695.78	23.099
AOS7 1155	265.338	7320.38	3.86871	13.6105	3.68473	1.71743	3.87437	0.173517	0.701298	0.181009	1031.46	6.68458	1015.06	24.8679	980.723	77.6569	980.723	77.6569	105.174			1681.6	21.1059	2582.58	13.6742
AOS7 262	1369.64	45628.9	7.80254	13.9434	0.66411	1.66457	0.862672	0.167925	0.522476	0.605649	1000.67	4.84268	995.12	5.47211	983.792	13.9591	983.792	13.9591	101.715			1706.92	12.5879	1494.55	92.3748
AOS7 1048	272.891	7009.62	2.75281	13.6754	3.87439	1.67083	4.21145	0.16855	0.907333	0.215444	1004.12	8.43659	997.503	26.7577	983.856	83.7777	983.856	83.7777	102.059			1805.3	20.6446	1464.9	49.8009
AOS7 1100	1526.62	38381.5	4.1014	13.8293	1.45795	1.67972	1.73637	0.169429	0.94109	0.541989	1008.96	8.78949	1000.88	11.0519	984.079	29.7076	984.079	29.7076	102.529			1923.44	19.0017	2372.8	14.7071
AOS7 656	218.491	8730.22	0.553774	13.7384	3.1634	1.66943	3.77981	0.168376	0.860315	0.227608	1003.16	7.99232	996.97	24.0066	984.253	74.9705	984.253	74.9705	101.921			1925.12	11.5558	1600.14	58.045
AOS7 886	397.773	7933.13	4.84074	13.8769	5.53488	1.62041	5.64186	0.163403	0.76016	0.134736	975.662	6.88262	978.151	35.4393	984.615	113.883	984.615	113.883	99.0908			1926.13	15.5185	2554.7	15.1574
AOS7 740	456.739	10644.7	1.77703	13.7208	1.63239	1.73686	2.25053	0.175138	0.921352	0.409393	1040.36	8.85187	1022.3	14.503	984.724	41.7953	984.724	41.7953	105.65			1935.7	13.2945	2314.9	14.998
AOS7 825	634.836	22327.3	1.53442	13.7916	2.0233	1.70271	2.27193	0.171519	0.781454	0.34396	1020.48	7.3754	1009.55	14.5344	986.815	43.4089	986.815	43.4089	103.411			1981.66	29.9022	1632.67	29.8765
AOS7 313	196.866	3698.67	2.27286	13.5565	5.38547	1.691	6.78921	0.170166	1.02433	0.150876	1013.03	9.6025	1005.14	43.3454	988.862	136.685	988.862	136.685	102.444			2113.84	17.0306	2717.07	21.6178
AOS7 599	312.57	10125.9	2.94501	13.9917	0.595457	1.72842	1.44603	0.173715	1.274	0.881034	1032.55	12.1552	1019.16	9.30159	991.417	13.8913	991.417	13.8913	104.149			2182.76	23.3954	2742.01	20.3097
AOS7 726	585.332	13050.3	2.76861	13.5368	2.07945	1.6918	2.24283	0.169903	0.740169	0.330016	1011.58	6.9295	1005.44	14.314	992.975	43.027	992.975	43.027	101.874			2206.95	94.9392	2171.68	482.504
AOS7 831	598.102	19360.4	3.86447	13.7272	1.67504	1.74801	1.98449	0.175463	0.939944	0.473645	1042.14	9.04478	1026.43	12.8182	993.943	35.5299	993.943	35.5299	104.849			2231.79	51.3794	1845.2	73.4093
AOS7 945	199.013	11828.6	2.26839	13.6587	5.45123	1.75691	5.78607	0.176126	1.03554	0.178972	1045.77	9.99668	1029.71	37.4574	996.603	115.738	996.603	115.738	104.934			2254.55	39.8982	2189.6	420.878
AOS7 213	410.614	20958.4	3.89125	13.8141	5.55553	1.75334	5.64372	0.175712	0.865086	0.153283	1043.51	8.33447	1028.39	36.5081	997.251	113.372	997.251	113.372	104.638			2331.98	14.5009	2707.65	22.737
AOS7 677	122.063	4629.71	0.409356	12.9601	6.42603	1.7571	6.7057	0.176081	1.23027	0.183467	1045.53	11.8739	1029.78	43.4193	997.346	134.043	997.346	134.043	104.831			2365.2	15.3324	2775.22	71.4689
AOS7 638	731.799	7406.86	3.13651	13.5713	1.9693	1.46725	2.58071	0.146999	1.39608	0.540968	884.118	11.534	916.997	15.5846	997.841	44.0911	997.841	44.0911	88.6031			2701.37	15.8293	2693.15	37.0462
AOS7 547	334.044	7519.8	3.23944	13.801	4.7438	1.70508	4.94883	0.170782	1.218	0.246118	1016.42	11.4533	1010.44	31.6838	998.368	97.4984	998.368	97.4984	101.808			3214.41	2843.18	1683.54	176.298
AOS7 317	337.264	6413.06	1.83602	13.799	2.89567	1.71236	3.05792	0.171483	0.891773	0.291627	1020.28	8.41507	1013.17	19.6046	998.702	59.4444	998.702	59.4444	102.16			4094.07	NA	1300.24	772.727
AOS7 164	138.693	5565.06	0.5253	13.5219	6.51939	1.66333	6.74012	0.166569	1.41324	0.209676	993.179	13.0083	994.647	42.7669	998.75	133.998	998.75	133.998	99.4422		Total	266
AOS7 322	322.203	19343.7	5.40216	13.8086	2.52417	1.83574	2.62011	0.183574	0.54618	0.208457	1086.47	5.46098	1058.34	17.2241	1001.62	52.0505	1001.62	52.0505	108.471
AOS7 116	213.165	5379.57	1.69983	13.3112	2.88127	1.85743	3.71545	0.185712	0.834772	0.224676	1098.11	8.42844	1066.07	24.528	1001.96	73.5252	1001.96	73.5252	109.595
AOS7 1040	2324.37	16685.6	4.81274	13.7586	1.04903	1.39408	1.53505	0.139305	1.0968	0.714503	840.731	8.64512	886.428	9.07637	1003.12	21.7815	1003.12	21.7815	83.8113
AOS7 122	349.892	7892.71	1.56966	13.6326	2.45395	1.55798	3.4836	0.155679	2.41243	0.692511	932.721	20.9492	953.666	21.547	1003.17	51.0346	1003.17	51.0346	92.9771
AOS7 94	1755.19	63819.6	9.40338	13.7576	0.590247	1.69073	0.854444	0.168904	0.615987	0.720921	1006.07	5.73786	1005.04	5.45157	1003.65	12.0085	1003.65	12.0085	100.24
AOS7 671	512.482	14545.9	4.89894	13.3547	1.86099	1.748	2.30662	0.174496	0.818029	0.354644	1036.84	7.83469	1026.42	14.8992	1005.16	43.7693	1005.16	43.7693	103.152
AOS7 960	904.164	22323.7	2.81136	13.6912	1.13621	1.66396	1.45693	0.16606	0.717436	0.49243	990.367	6.58637	994.887	9.2405	1005.73	25.73	1005.73	25.73	98.4728
AOS7 926	436.102	14024.7	0.682728	13.5656	4.28154	1.73831	4.40834	0.173428	0.859747	0.195027	1030.97	8.19128	1022.84	28.4226	1006.34	87.7608	1006.34	87.7608	102.448
AOS7 1139	86.4679	3537.63	3.43515	13.0906	9.79548	1.77288	10.0807	0.176875	1.98764	0.197172	1049.88	19.2572	1035.58	65.5349	1006.36	200.956	1006.36	200.956	104.324
AOS7 794	185.207	5185.49	1.5425	13.534	7.6812	1.80748	7.80492	0.180201	0.918462	0.117677	1068.07	9.04025	1048.17	51.0647	1007.78	157.435	1007.78	157.435	105.983
AOS7 1176	279.816	7571.1	0.648504	13.6058	2.42239	1.79893	2.95591	0.179345	1.41804	0.479733	1063.39	13.9013	1045.07	19.2928	1007.82	52.635	1007.82	52.635	105.515
AOS7 450	177.999	6656.28	1.23737	13.2981	5.83946	1.72491	6.40337	0.171957	0.575003	0.0897968	1022.89	5.43872	1017.86	41.1804	1007.91	129.498	1007.91	129.498	101.486
AOS7 32	570.399	12767	3.28033	13.5829	2.07613	1.73959	2.34341	0.173343	0.900881	0.384432	1030.5	8.5796	1023.31	15.1102	1008.82	43.8797	1008.82	43.8797	102.149
AOS7 333	197.408	28768.5	2.93502	13.8107	4.66584	1.74644	4.82508	0.174019	1.16671	0.2418	1034.21	11.1481	1025.85	31.1641	1008.91	95.0021	1008.91	95.0021	102.508
AOS7 866	1910.24	63735.7	10.8746	13.6731	0.716882	1.65157	0.940856	0.16444	0.5888	0.625812	981.402	5.36013	990.154	5.95049	1010.46	14.8797	1010.46	14.8797	97.1239
AOS7 515	473.327	27074.1	2.33025	13.717	2.02583	1.80553	2.22595	0.179692	0.778117	0.349566	1065.29	7.64052	1047.46	14.5467	1011.32	42.286	1011.32	42.286	105.336
AOS7 405	52.9143	2145.54	2.18339	12.802	4.1152	1.66737	10.4426	0.165833	4.84617	0.464077	989.112	44.4385	996.186	66.3751	1012.65	187.891	1012.65	187.891	97.6752
AOS7 382	801.94	39388.6	13.8073	13.7249	1.17404	1.79443	1.4451	0.178424	0.791104	0.547441	1058.36	7.72155	1043.44	9.42264	1013.18	24.5029	1013.18	24.5029	104.459
AOS7 908	431.207	15351.1	0.951399	13.5828	2.00544	1.66548	2.18506	0.165516	0.809373	0.370412	987.357	7.40949	995.465	13.8639	1014.23	41.1333	1014.23	41.1333	97.35
AOS7 900	158.655	5108.97	3.0632	13.3319	6.06615	1.8426	6.38986	0.182919	1.05865	0.165677	1082.9	10.5529	1060.79	42.0809	1016.45	127.77	1016.45	127.77	106.538
AOS7 817	178.789	6562.08	1.57528	13.3192	3.44433	1.85999	3.87179	0.184538	0.903949	0.233471	1091.72	9.07821	1066.98	25.5729	1017.61	76.2961	1017.61	76.2961	107.283
AOS7 627	265.59	6469.87	3.32976	13.4283	2.27435	1.76807	2.94322	0.175356	1.6872	0.573251	1041.56	16.227	1033.81	19.0909	1018.33	48.8558	1018.33	48.8558	102.281
AOS7 276	292.21	9991.8	0.961002	13.4287	5.59807	1.77169	5.73151	0.175549	1.06731	0.186218	1042.61	10.2746	1035.14	37.2166	1020.26	114.115	1020.26	114.115	102.191
AOS7 498	807.868	29158.3	3.33388	13.6322	1.88669	1.88016	2.10643	0.186275	0.862231	0.409334	1101.16	8.72792	1074.12	13.9631	1020.49	38.9117	1020.49	38.9117	107.905
AOS7 454	1337.1	7804.63	3.15348	13.2775	1.12355	1.74655	1.43719	0.173021	0.51657	0.35943	1028.74	4.9118	1025.89	9.28005	1020.68	27.1707	1020.68	27.1707	100.789
AOS7 506	1162	74637.7	8.85882	13.6696	1.54384	1.77009	1.69122	0.175266	0.658915	0.389609	1041.06	6.33446	1034.55	10.9736	1021.68	31.5289	1021.68	31.5289	101.897
AOS7 641	211.678	7778.46	1.41383	13.4347	5.53895	1.88232	5.9703	0.186283	1.03931	0.17408	1101.21	10.5208	1074.88	39.6093	1022.73	119.082	1022.73	119.082	107.674
AOS7 417	295.873	6381	3.39109	13.6028	2.73235	1.74982	3.16671	0.1731	0.778792	0.245931	1029.17	7.408	1027.1	20.4638	1023.55	62.1228	1023.55	62.1228	100.549
AOS7 1158	1564.72	31626.3	5.913	13.5939	1.00318	1.65597	1.28895	0.163782	0.801702	0.621981	977.763	7.27322	991.836	8.16026	1023.96	20.4225	1023.96	20.4225	95.4885
AOS7 407	573.445	29278.3	4.60367	13.8756	0.612181	1.61706	1.19705	0.159744	0.911311	0.761298	955.355	8.09186	976.85	7.51039	1026.36	15.6995	1026.36	15.6995	93.0821
AOS7 830	630.744	16847.7	3.72313	13.4881	0.930311	1.76934	1.492	0.174737	0.917146	0.61471	1038.16	8.7943	1034.28	9.67934	1026.94	23.8207	1026.94	23.8207	101.093
AOS7 874	1404.02	44873	3.28851	13.7119	0.818581	1.74903	1.09139	0.17255	0.716169	0.656202	1026.15	6.79389	1026.81	7.05072	1029.07	16.6705	1029.07	16.6705	99.7161
AOS7 97	584.881	7877.07	0.729156	13.236	1.33108	1.38614	2.72795	0.136731	1.84125	0.67496	826.148	14.2771	883.056	16.0921	1029.35	40.6986	1029.35	40.6986	80.2595
AOS7 1189	399.335	18932.3	2.28186	13.4894	1.91175	1.81817	2.29579	0.179292	1.24717	0.543241	1063.1	12.2232	1052.03	15.0405	1029.96	38.9775	1029.96	38.9775	103.218
AOS7 764	904.877	5175.84	2.32522	13.1611	1.96513	1.50426	2.87033	0.148296	1.35798	0.47311	891.406	11.3055	932.114	17.5085	1030.51	51.1327	1030.51	51.1327	86.5014
AOS7 1017	857.512	21955.8	8.09396	13.4912	1.15207	1.78176	1.51201	0.175625	0.951196	0.629093	1043.03	9.16022	1038.82	9.83397	1030.84	23.7784	1030.84	23.7784	101.182
AOS7 415	756.689	24814.2	2.22722	13.8608	1.44406	1.73536	1.66874	0.170969	0.551929	0.330747	1017.45	5.19485	1021.74	10.75	1031.82	31.8489	1031.82	31.8489	98.607
AOS7 979	1577.99	78204.7	4.56174	13.5873	1.06845	1.76252	1.24239	0.173633	0.630133	0.507196	1032.1	6.00968	1031.77	8.04867	1031.95	21.6583	1031.95	21.6583	100.015
AOS7 16	423.66	8139.21	2.06498	13.5078	2.30903	1.67107	2.9213	0.164601	0.90328	0.309205	982.295	8.22993	997.593	18.5594	1032.23	56.1519	1032.23	56.1519	95.1621
AOS7 1062	809.735	34105.3	5.14191	13.7583	1.13486	1.76066	1.42623	0.17318	0.823095	0.57711	1029.61	7.8325	1031.09	9.23625	1035.11	23.5483	1035.11	23.5483	99.4687
AOS7 229	304.727	8806.75	1.95538	13.4422	3.65584	1.75579	4.28761	0.172688	0.884623	0.206321	1026.9	8.39763	1029.3	27.7447	1035.25	84.782	1035.25	84.782	99.1943
AOS7 849	183.409	6345.18	1.00153	13.2776	5.80486	1.87236	6.12911	0.184125	1.30418	0.212784	1089.47	13.0728	1071.37	40.5891	1035.56	121.051	1035.56	121.051	105.206
AOS7 809	1740.29	77989.8	35.633	13.6324	0.808735	1.73068	1.0652	0.170038	0.672352	0.631199	1012.32	6.29885	1020	6.85509	1037.39	16.7023	1037.39	16.7023	97.5835
AOS7 681	341.953	10796.4	2.20953	13.1405	3.80305	1.83739	3.89822	0.180521	0.765982	0.196495	1069.82	7.55075	1058.93	25.6372	1037.4	77.1914	1037.4	77.1914	103.125
AOS7 252	259.498	6857.18	2.11975	13.4539	2.33742	1.77432	2.64329	0.174022	0.90691	0.343099	1034.24	8.66585	1036.1	17.1669	1040.9	50.0997	1040.9	50.0997	99.3595
AOS7 1013	191.776	4993.5	1.35499	13.035	4.22334	1.72609	4.57798	0.169229	1.21933	0.266347	1007.86	11.3767	1018.29	29.4407	1041.65	89.0934	1041.65	89.0934	96.7566
AOS7 906	410.604	12581.6	3.95232	13.3847	2.01217	1.7372	2.24101	0.170309	0.787831	0.351551	1013.81	7.39075	1022.43	14.4427	1041.77	42.36	1041.77	42.36	97.3165
AOS7 1175	267.252	10718.5	2.29649	13.4799	1.84108	1.84356	2.32689	0.180663	0.780235	0.335312	1070.6	7.69638	1061.13	15.3191	1042.59	44.2512	1042.59	44.2512	102.687
AOS7 907	471.001	13271.8	2.08806	13.3526	1.46522	1.87216	1.62971	0.183465	0.557185	0.341892	1085.87	5.56821	1071.3	10.7868	1042.6	30.9226	1042.6	30.9226	104.151
AOS7 390	938.539	29769.3	4.8833	13.7388	1.31477	1.56833	2.5332	0.153525	2.1535	0.850108	920.694	18.4764	957.765	15.708	1044.76	26.928	1044.76	26.928	88.1249
AOS7 699	552.796	16800.6	3.34879	13.35	2.53967	1.80106	2.64593	0.176136	0.702349	0.265445	1045.83	6.78051	1045.84	17.2765	1046.77	51.4466	1046.77	51.4466	99.9103
AOS7 933	1405.28	35328.3	4.29862	13.4473	0.649361	1.76762	0.856016	0.172865	0.538121	0.628634	1027.88	5.11277	1033.65	5.55135	1046.78	13.4432	1046.78	13.4432	98.1942
AOS7 286	1171.06	7324.79	1.38381	13.136	0.735721	1.57443	1.39457	0.153939	1.1021	0.790282	923.006	9.47778	960.176	8.66011	1047.21	17.2491	1047.21	17.2491	88.1399
AOS7 130	1113.8	38051.7	24.9157	13.5745	1.09195	1.80536	1.4629	0.176497	0.946191	0.646793	1047.81	9.15049	1047.4	9.55943	1047.44	22.5156	1047.44	22.5156	100.035
AOS7 209	325.566	10634.6	1.33693	13.5121	1.97781	1.88232	2.33131	0.183911	0.898056	0.385216	1088.3	8.99311	1074.88	15.4602	1048.65	43.3756	1048.65	43.3756	103.782
AOS7 504	382.914	8524.03	2.56006	13.2229	3.58491	1.97858	4.00892	0.193275	0.873333	0.217847	1139.09	9.11871	1108.24	27.0461	1049.08	78.9039	1049.08	78.9039	108.58
AOS7 824	254.592	11383	4.97109	13.2663	5.2011	1.72748	5.30217	0.168708	0.920473	0.173603	1004.99	8.56564	1018.81	34.1113	1049.54	105.321	1049.54	105.321	95.7556
AOS7 1023	1500.25	42807.2	30.8702	13.4765	1.23706	1.49164	1.59394	0.145671	0.934554	0.586316	876.654	7.66015	926.985	9.68935	1049.59	26.0463	1049.59	26.0463	83.5231
AOS7 883	422.338	35872.2	2.2119	13.6627	2.96652	1.73908	3.17108	0.169789	1.10854	0.349579	1010.95	10.3723	1023.12	20.4461	1050.15	59.8742	1050.15	59.8742	96.2676
AOS7 611	1564.3	30732.1	34.1819	13.6544	0.995748	1.76964	1.20604	0.172737	0.673077	0.558087	1027.17	6.39099	1034.39	7.82462	1050.57	20.1886	1050.57	20.1886	97.7733
AOS7 1096	218.302	10051.9	6.22658	13.1718	3.15061	1.92726	3.45296	0.188106	1.05402	0.30525	1111.11	10.7575	1090.59	23.0875	1050.75	66.2877	1050.75	66.2877	105.744
AOS7 1050	447.062	14081.9	40.5299	13.4249	1.6706	1.96539	2.17135	0.191817	1.09215	0.502982	1131.21	11.3313	1103.73	14.6136	1050.86	37.8366	1050.86	37.8366	107.646
AOS7 947	1898.89	53783.8	4.42063	13.4639	0.720786	1.83484	0.920101	0.178969	0.555203	0.603415	1061.34	5.43306	1058.01	6.047	1052.06	14.8032	1052.06	14.8032	100.882
AOS7 1081	202.069	8062.05	1.69647	13.3141	4.51423	1.86462	5.11415	0.181872	0.73125	0.142985	1077.2	7.25405	1068.63	33.8133	1052.08	102.029	1052.08	102.029	102.388
AOS7 1087	1550.48	6916.84	10.5811	13.0006	1.08148	1.55981	2.82353	0.152059	1.11065	0.393356	912.494	9.45003	954.39	17.4714	1053.16	52.3104	1053.16	52.3104	86.6433
AOS7 846	167.869	6924.52	0.419768	13.1617	4.79784	1.80275	5.12184	0.175643	0.800937	0.156377	1043.13	7.71387	1046.45	33.4629	1054.3	101.954	1054.3	101.954	98.9405
AOS7 420	357.994	9155.91	2.21674	13.5216	3.08707	1.97381	3.38462	0.192232	1.02636	0.303243	1133.46	10.6681	1106.61	22.8142	1055.11	64.9715	1055.11	64.9715	107.425
AOS7 1132	1906.03	14392.7	13.9019	13.3576	0.875644	1.53125	1.20664	0.149063	0.77751	0.644361	895.71	6.50206	943.001	7.41184	1056.03	18.6013	1056.03	18.6013	84.8189
AOS7 342	1358.5	33035.3	29.5419	13.6908	1.0352	1.46604	1.78923	0.142696	1.40729	0.786534	859.888	11.3288	916.499	10.8009	1056.3	22.269	1056.3	22.269	81.4058
AOS7 1136	1785.4	59135	6.3275	13.4107	0.686064	1.85097	1.02708	0.179916	0.75397	0.73409	1066.52	7.41126	1063.78	6.77093	1059.05	14.0382	1059.05	14.0382	100.705
AOS7 207	429.015	22814.8	1.89168	13.6033	2.45363	1.86431	2.56685	0.181188	0.72037	0.280644	1073.46	7.12336	1068.51	16.9656	1059.32	49.5944	1059.32	49.5944	101.335
AOS7 545	895.347	35881.8	2.51803	13.6771	0.740704	1.85302	1.22795	0.180091	0.911604	0.742376	1067.47	8.9681	1064.5	8.09835	1059.33	16.5783	1059.33	16.5783	100.769
AOS7 92	713.732	19542.4	3.14271	13.2398	1.20272	1.87389	1.41835	0.182088	0.673906	0.475132	1078.37	6.69191	1071.91	9.39077	1059.67	25.1371	1059.67	25.1371	101.765
AOS7 602	182.899	7659.16	4.57945	13.447	4.12087	1.89194	4.63879	0.183734	0.688058	0.148327	1087.34	6.88459	1078.26	30.8238	1060.85	92.3525	1060.85	92.3525	102.497
AOS7 609	170.73	7782	2.05395	13.3377	5.4678	1.87507	5.80771	0.182094	1.39347	0.239935	1078.4	13.8376	1072.32	38.4779	1060.87	113.548	1060.87	113.548	101.652
AOS7 404	417.011	10957.8	1.29124	13.4224	1.277	1.91689	1.93985	0.186123	0.99872	0.514845	1100.34	10.1026	1086.99	12.9449	1061.22	33.4825	1061.22	33.4825	103.687
AOS7 31	1502.35	34661.6	8.19727	13.363	1.02383	1.66548	1.30762	0.161684	0.792943	0.6064	966.127	7.11441	995.467	8.29634	1061.58	20.9348	1061.58	20.9348	91.0086
AOS7 1044	126.769	5976.49	1.9777	13.1139	9.58769	1.86537	9.82094	0.181066	0.971843	0.0989563	1072.8	9.60456	1068.89	65.007	1061.83	197.072	1061.83	197.072	101.033
AOS7 13	727.931	21818.7	2.26994	13.5087	2.35807	1.80082	2.52351	0.174738	0.452389	0.17927	1038.16	4.33787	1045.76	16.4763	1062.54	49.9511	1062.54	49.9511	97.7054
AOS7 790	1584.86	34740.3	6.89501	13.5438	0.850127	1.77617	1.26085	0.172339	0.873065	0.692441	1024.98	8.27361	1036.78	8.1911	1062.63	18.3196	1062.63	18.3196	96.4569
AOS7 614	253.864	5247.81	9.44609	13.1229	5.22604	1.54494	5.8008	0.149899	2.18405	0.376507	900.399	18.3536	948.475	35.771	1062.68	108.2	1062.68	108.2	84.7294
AOS7 762	1436.76	16225.4	9.59333	13.3253	0.580257	1.83148	0.929888	0.177689	0.703017	0.756023	1054.34	6.83775	1056.81	6.10737	1062.81	12.2439	1062.81	12.2439	99.2022
AOS7 425	1374.78	38492.6	4.95394	13.8153	0.553461	1.74906	0.880042	0.169562	0.630322	0.716241	1009.7	5.89095	1026.81	5.68536	1064.36	12.3504	1064.36	12.3504	94.8637
AOS7 1161	2204.57	57444.7	18.768	13.358	0.600261	1.81092	0.996528	0.175502	0.790691	0.793445	1042.35	7.60998	1049.41	6.51894	1065.03	12.1966	1065.03	12.1966	97.8711
AOS7 629	871.496	40705.7	6.39624	13.4556	1.1035	1.82678	1.28695	0.177011	0.596538	0.463527	1050.63	5.78331	1055.12	8.44495	1065.33	22.9412	1065.33	22.9412	98.6197
AOS7 91	828.929	29784.7	11.2632	13.2438	0.97962	1.78067	1.3507	0.172506	0.782176	0.579089	1025.9	7.41843	1038.42	8.78282	1065.77	22.1623	1065.77	22.1623	96.2594
AOS7 877	963.969	42597.2	18.4892	13.4592	0.828811	1.79852	1.17604	0.174188	0.763496	0.649209	1035.14	7.30138	1044.92	7.67445	1066.32	17.9862	1066.32	17.9862	97.0763
AOS7 325	1006.9	39346.9	6.01338	13.4432	1.41498	1.87735	1.61263	0.181791	0.703118	0.436008	1076.75	6.97232	1073.13	10.684	1066.67	29.1889	1066.67	29.1889	100.945
AOS7 767	370.703	15622.3	1.05043	13.2507	1.3722	1.93119	1.72819	0.186996	0.746605	0.432015	1105.08	7.58215	1091.95	11.5617	1066.76	31.3371	1066.76	31.3371	103.592
AOS7 543	549.985	20063.1	4.59187	13.4838	1.68181	1.87445	1.99119	0.181438	0.680538	0.341775	1074.82	6.73732	1072.1	13.1852	1067.47	37.6395	1067.47	37.6395	100.689
AOS7 722	377.428	16216.2	0.749693	13.0755	2.99896	1.96814	3.14196	0.19029	0.83291	0.265092	1122.94	8.5838	1104.67	21.1576	1069.76	60.912	1069.76	60.912	104.972
AOS7 859	462.688	15626.7	1.19191	13.1538	1.80135	1.61741	3.50298	0.156318	2.93139	0.836828	936.282	25.5462	976.985	21.9828	1070.54	38.5369	1070.54	38.5369	87.4586
AOS7 192	292.178	22423.7	3.90708	13.8515	4.26108	1.98417	4.3289	0.191676	0.727748	0.168114	1130.45	7.54588	1110.14	29.2337	1071.47	85.7694	1071.47	85.7694	105.504
AOS7 1185	762.205	30222.7	48.3111	13.4471	1.42553	1.84335	1.74189	0.17805	0.894704	0.51364	1056.31	8.71717	1061.06	11.4669	1071.73	30.0456	1071.73	30.0456	98.5614
AOS7 234	743.445	21639.6	3.08032	13.4347	1.01016	1.87611	1.54503	0.181097	0.816872	0.528711	1072.97	8.07418	1072.69	10.2337	1073.02	26.3317	1073.02	26.3317	99.9946
AOS7 258	1062.12	4134.47	13.1731	12.8261	1.13527	1.55428	2.32166	0.149902	1.25669	0.541289	900.416	10.5607	952.197	14.3456	1074.76	39.2042	1074.76	39.2042	83.7787
AOS7 56	186.881	6568.71	2.93488	13.2379	2.66907	2.07093	3.48179	0.199723	1.18551	0.340487	1173.83	12.7224	1139.24	23.8456	1074.83	65.7548	1074.83	65.7548	109.211
AOS7 228	966.496	13691.2	4.69793	13.3412	1.20585	1.72664	1.46852	0.166459	0.79664	0.542477	992.573	7.32857	1018.5	9.44272	1075.55	24.7606	1075.55	24.7606	92.2852
AOS7 508	377.099	10803.6	8.21505	13.1064	2.19433	1.9115	2.58674	0.184169	0.866349	0.33492	1089.71	8.68591	1085.11	17.2457	1076.77	48.9417	1076.77	48.9417	101.202
AOS7 1183	838.844	30197.4	3.86008	13.2868	1.15965	1.87995	1.44768	0.18109	0.820554	0.566807	1072.93	8.11031	1074.05	9.5957	1077.21	23.9221	1077.21	23.9221	99.6027
AOS7 535	290.794	7104.04	2.30274	13.1668	5.81463	1.70708	5.9592	0.164397	0.966824	0.16224	981.164	8.79949	1011.19	38.1747	1077.71	118.118	1077.71	118.118	91.0413
AOS7 193	354.394	11842.5	0.97181	13.6973	2.72869	1.93584	3.09641	0.186369	0.810959	0.261903	1101.68	8.21244	1093.56	20.7341	1078.32	60.0067	1078.32	60.0067	102.166
AOS7 905	553.991	26668.4	4.25905	13.2464	1.87348	1.8811	1.97247	0.181025	0.575215	0.291622	1072.57	5.68367	1074.45	13.0773	1079.14	37.8837	1079.14	37.8837	99.3918
AOS7 648	578.106	35502.4	6.08087	13.3335	0.981742	1.84166	1.24901	0.177198	0.731233	0.585448	1051.65	7.0955	1060.45	8.21947	1079.5	20.3013	1079.5	20.3013	97.4195
AOS7 260	695.248	9203.44	2.23321	13.1117	1.43822	1.71156	2.04847	0.164637	0.895593	0.437202	982.496	8.16144	1012.87	13.1297	1079.99	36.9876	1079.99	36.9876	90.9723
AOS7 123	277.163	10289.8	1.06592	13.1719	3.10264	1.76257	3.49131	0.169506	1.08419	0.31054	1009.39	10.1299	1031.79	22.6216	1080.49	66.6185	1080.49	66.6185	93.4189
AOS7 453	280.215	11853	2.6777	13.0012	3.68111	1.95714	3.83713	0.188181	0.777091	0.202519	1111.51	7.93384	1100.9	25.7917	1080.85	75.411	1080.85	75.411	102.837
AOS7 93	143.101	12253.5	3.21048	13.0269	9.94199	1.93801	10.0878	0.186318	1.43762	0.142511	1101.4	14.5551	1094.31	67.6658	1081.1	200.769	1081.1	200.769	101.878
AOS7 466	809.136	38579.2	14.5642	13.2335	2.16937	1.89525	2.3439	0.182147	0.860575	0.367155	1078.69	8.54785	1079.42	15.5806	1081.8	43.7387	1081.8	43.7387	99.713
AOS7 847	1011.55	32213.8	5.09172	13.265	1.56601	1.59661	1.68566	0.15344	0.605721	0.359338	920.219	5.19439	968.886	10.5246	1081.87	31.5377	1081.87	31.5377	85.0586
AOS7 319	1531.49	36246.7	4.87084	13.3339	0.788318	1.83585	1.07887	0.176392	0.629802	0.583759	1047.23	6.08764	1058.37	7.09187	1082.29	17.5507	1082.29	17.5507	96.7606
AOS7 242	568.583	24393.8	1.97012	13.5444	2.09746	1.86006	2.28063	0.178699	0.742438	0.325541	1059.86	7.25601	1067.01	15.0615	1082.5	43.2631	1082.5	43.2631	97.9089
AOS7 968	365.706	9381.71	0.854815	12.9711	1.16099	1.77655	2.27399	0.170655	1.01473	0.446234	1015.72	9.53588	1036.92	14.7748	1082.78	40.8196	1082.78	40.8196	93.8064
AOS7 680	407.189	69492.3	1.93167	13.0359	3.58155	1.93882	3.79257	0.186199	1.23238	0.324946	1100.75	12.4705	1094.59	25.4108	1083.21	71.9546	1083.21	71.9546	101.62
AOS7 473	499.006	29812.9	4.17666	13.2926	2.36953	1.8122	2.53857	0.174033	0.868643	0.342179	1034.29	8.30062	1049.87	16.6118	1083.29	47.8455	1083.29	47.8455	95.477
AOS7 494	288.693	17545.8	0.836814	13.1927	3.38076	1.89587	3.55445	0.181931	0.858188	0.241441	1077.51	8.51559	1079.64	23.6325	1084.83	69.1791	1084.83	69.1791	99.3252
AOS7 1120	871.356	44174.5	9.20666	13.3506	1.5289	1.82858	1.69077	0.175447	0.720156	0.425933	1042.05	6.92926	1055.77	11.0988	1085.14	30.6711	1085.14	30.6711	96.0292
AOS7 288	837.787	24141.3	5.89865	13.1869	1.23855	2.04321	1.45751	0.195971	0.595457	0.408544	1153.64	6.28985	1130.03	9.93657	1085.83	26.6528	1085.83	26.6528	106.245
AOS7 698	1194.55	77967	3.52259	13.1131	0.679003	1.98885	1.15105	0.190745	0.924191	0.802912	1125.41	9.54364	1111.73	7.77732	1085.97	13.7548	1085.97	13.7548	103.631
AOS7 78	242.292	5602.87	3.55238	12.7797	3.66048	2.07868	4.40706	0.199344	0.798226	0.181125	1171.79	8.5527	1141.8	30.2225	1086.1	86.9424	1086.1	86.9424	107.89
AOS7 941	484.764	26641.9	2.82473	13.187	2.50383	1.89045	2.65892	0.181231	0.786713	0.295877	1073.7	7.78095	1077.74	17.6595	1086.81	50.937	1086.81	50.937	98.7931
AOS7 683	806.936	32424.3	3.11563	12.9744	1.0443	2.03254	1.2998	0.19477	0.69647	0.535829	1147.16	7.3191	1126.47	8.84605	1087.67	21.9772	1087.67	21.9772	105.469
AOS7 212	934.641	30600.5	3.41219	13.3429	1.39332	1.90453	1.60539	0.182434	0.775357	0.482971	1080.26	7.71166	1082.67	10.689	1088.42	28.1714	1088.42	28.1714	99.2495
AOS7 19	363.552	11918.6	3.06641	13.1905	2.5535	1.88818	2.73458	0.180751	0.787316	0.287911	1071.08	7.76945	1076.94	18.1546	1089.69	52.4951	1089.69	52.4951	98.2915
AOS7 416	169.351	6418.8	1.29359	13.1663	9.64299	2.09179	9.68838	0.20003	0.75846	0.0782856	1175.48	8.14995	1146.11	66.6519	1091.81	193.889	1091.81	193.889	107.664
AOS7 1022	214.781	14751.9	3.96026	13.0565	4.22548	1.79969	4.34079	0.171933	0.965895	0.222516	1022.76	9.13494	1045.35	28.34	1093.76	84.7949	1093.76	84.7949	93.5078
AOS7 985	1362.54	35047.8	81.0856	13.3509	1.29575	1.66904	1.91894	0.159264	1.40046	0.729808	952.687	12.403	996.822	12.185	1096.12	26.2599	1096.12	26.2599	86.9143
AOS7 485	146.153	6744.44	2.24208	12.9635	8.13117	2.02822	8.98703	0.19353	3.68939	0.410523	1140.47	38.5648	1125.02	61.1926	1096.19	164.296	1096.19	164.296	104.039
AOS7 305	407.493	16723.1	2.06412	13.6572	2.95959	1.91477	3.22262	0.182653	1.0321	0.320267	1081.45	10.2757	1086.25	21.4989	1096.72	61.1169	1096.72	61.1169	98.6075
AOS7 74	220.947	7466.85	3.03719	12.7734	3.94492	1.85828	4.29473	0.177208	1.10776	0.257935	1051.71	10.7497	1066.38	28.3586	1097.38	83.0936	1097.38	83.0936	95.838
AOS7 488	267.005	12471.1	2.56719	13.077	6.31235	2.1481	6.42225	0.204841	0.985542	0.153457	1201.27	10.8014	1164.44	44.5247	1097.44	127.107	1097.44	127.107	109.461
AOS7 692	320.769	15203.6	0.96792	12.8837	1.89886	2.03322	2.96136	0.193747	1.92264	0.649243	1141.64	20.116	1126.69	20.1585	1098.86	45.0524	1098.86	45.0524	103.894
AOS7 33	188.097	3322.18	3.47833	12.5992	3.98713	2.08699	4.6017	0.198856	1.62429	0.352975	1169.17	17.3682	1144.54	31.599	1099.01	86.201	1099.01	86.201	106.384
AOS7 179	1759.7	52738.8	3.57333	13.4722	1.00877	1.86839	1.23777	0.177945	0.714638	0.577358	1055.74	6.95928	1069.96	8.18671	1099.94	20.2371	1099.94	20.2371	95.9813
AOS7 514	141.015	3833.85	2.07699	12.6047	2.82574	2.13123	4.32002	0.202964	1.16633	0.269984	1191.22	12.6855	1158.98	29.8645	1100.08	83.2644	1100.08	83.2644	108.285
AOS7 6	250.03	10695.5	1.99866	13.2436	1.91113	1.88995	2.14927	0.179925	0.958861	0.446134	1066.56	9.42565	1077.56	14.2728	1100.73	38.4662	1100.73	38.4662	96.8964
AOS7 687	992.549	33587.8	5.01628	12.8496	1.36593	2.08551	1.60097	0.19831	0.783895	0.489636	1166.23	8.3628	1144.05	10.9879	1103.12	27.9141	1103.12	27.9141	105.722
AOS7 103	517.846	10216	15.561	12.8099	0.951117	2.13718	1.20131	0.203157	0.667665	0.555779	1192.26	7.26752	1160.91	8.30994	1103.73	19.9717	1103.73	19.9717	108.021
AOS7 50	702.107	17287.1	2.96541	13.3274	1.19956	1.89164	1.73854	0.179801	0.815645	0.469156	1065.89	8.01316	1078.16	11.5486	1103.94	30.6786	1103.94	30.6786	96.5536
AOS7 285	308.256	9832.5	1.61547	12.8609	4.7761	1.94275	4.84714	0.184655	0.788125	0.162596	1092.35	7.91922	1095.95	32.5033	1103.97	95.6737	1103.97	95.6737	98.9478
AOS7 532	659.717	23867.9	4.88326	13.2416	1.15981	1.91866	1.3879	0.18236	0.711846	0.512895	1079.86	7.07759	1087.6	9.26432	1104.01	23.821	1104.01	23.821	97.8125
AOS7 852	390.411	28718.4	3.89377	13.1017	2.31979	1.80717	2.41905	0.171707	0.614669	0.254095	1021.51	5.8067	1048.06	15.814	1104.69	46.7595	1104.69	46.7595	92.47
AOS7 1121	252.071	9854.17	8.7276	13.0285	2.42984	2.07194	2.80602	0.196861	0.901043	0.321111	1158.43	9.55387	1139.57	19.2193	1104.73	53.1135	1104.73	53.1135	104.861
AOS7 410	537.681	16135.5	3.28127	13.3647	1.18323	1.88977	1.5574	0.179285	0.83878	0.538578	1063.07	8.22039	1077.5	10.3416	1107.66	26.2155	1107.66	26.2155	95.9742
AOS7 304	1148.87	16479.2	4.34461	13.5796	0.889443	1.83357	1.31556	0.173931	0.611332	0.464692	1033.73	5.83888	1057.56	8.64402	1107.92	23.2769	1107.92	23.2769	93.3036
AOS7 1130	111.569	3373.94	2.16774	12.4971	7.76478	1.95399	8.16343	0.18535	1.60533	0.19665	1096.14	16.182	1099.82	54.8831	1107.97	160.185	1107.97	160.185	98.9322
AOS7 1102	483.218	11864.8	3.03512	12.8656	3.16468	2.07397	3.55808	0.1965	1.0982	0.308651	1156.49	11.6266	1140.25	24.3799	1110.31	67.6377	1110.31	67.6377	104.159
AOS7 1009	266.443	13004.5	10.3435	12.945	3.80682	1.95342	3.91869	0.184988	0.836824	0.213547	1094.17	8.42137	1099.62	26.3231	1111.28	76.5026	1111.28	76.5026	98.4603
AOS7 1079	200.794	13805.9	2.37629	13.0583	4.61382	1.78996	4.84079	0.169488	1.10722	0.228726	1009.29	10.3441	1041.81	31.5451	1111.53	94.18	1111.53	94.18	90.8021
AOS7 430	845.646	27513.1	4.09869	13.321	1.67938	1.93164	1.81974	0.182672	0.591404	0.324993	1081.56	5.88858	1092.11	12.1752	1114.05	34.3591	1114.05	34.3591	97.0832
AOS7 996	160.269	4718.53	2.95556	13.0479	8.43075	1.93466	8.48703	0.182938	0.902474	0.106336	1083.01	8.99696	1093.15	56.8704	1114.27	168.742	1114.27	168.742	97.1942
AOS7 519	400.451	14194.7	2.89288	13.0221	3.15554	2.12282	3.3242	0.200633	0.795909	0.239429	1178.72	8.57383	1156.25	22.9487	1115.23	64.4364	1115.23	64.4364	105.693
AOS7 458	199.711	7987.12	2.18705	12.7584	4.21179	2.17661	4.31823	0.205666	0.842483	0.195099	1205.69	9.26435	1173.6	30.0524	1115.77	84.5786	1115.77	84.5786	108.059
AOS7 1122	632.35	20112.3	4.75728	13.0803	1.70309	1.83869	1.92235	0.173705	0.669148	0.348088	1032.49	6.38403	1059.39	12.6437	1116.12	35.9492	1116.12	35.9492	92.5075
AOS7 188	278.239	6799.59	1.8937	13.2228	2.58143	2.0362	2.89414	0.192258	0.783398	0.270684	1133.6	8.14358	1127.69	19.7103	1117.22	55.6036	1117.22	55.6036	101.465
AOS7 650	612.716	9076.46	2.42495	12.8898	1.55132	1.69078	1.9101	0.159597	1.01816	0.533039	954.535	9.03338	1005.06	12.1875	1117.81	32.2405	1117.81	32.2405	85.3935
AOS7 682	162.009	10424.4	1.17889	12.625	9.65216	2.16105	9.73872	0.203958	1.19135	0.122331	1196.55	13.0103	1168.61	67.703	1118.09	193.276	1118.09	193.276	107.017
AOS7 444	495.485	14864.3	15.2415	12.821	0.999142	2.16156	1.79726	0.203793	1.41885	0.78945	1195.66	15.4843	1168.77	12.4775	1120.18	22.0171	1120.18	22.0171	106.739
AOS7 644	286.755	14693.8	2.6264	12.9273	3.59029	2.15875	3.79097	0.20338	1.0686	0.281881	1193.45	11.6423	1167.87	26.3127	1121.63	72.5408	1121.63	72.5408	106.403
AOS7 921	292.55	6638.48	3.95041	12.6332	4.12543	1.93995	4.86849	0.182682	1.01975	0.209459	1081.61	10.1541	1094.98	32.6305	1122.54	94.9866	1122.54	94.9866	96.3543
AOS7 202	404.865	20093.5	1.82808	13.1978	2.26792	2.0571	2.64007	0.193484	1.02873	0.389658	1140.22	10.7509	1134.66	18.04	1124.91	48.4676	1124.91	48.4676	101.361
AOS7 1196	734.022	60492.9	2.37838	12.8621	1.96858	2.02389	2.1298	0.190321	0.81002	0.380326	1123.11	8.34905	1123.56	14.475	1125.3	39.2418	1125.3	39.2418	99.8056
AOS7 261	303.843	9132.53	3.5057	12.8218	2.71075	2.10377	3.19554	0.197821	0.702114	0.219717	1163.6	7.47491	1150.04	21.9964	1125.42	62.144	1125.42	62.144	103.392
AOS7 165	867.361	23987.3	19.3722	13.0489	1.24811	2.07304	1.60899	0.194896	0.999563	0.621236	1147.84	10.51	1139.94	11.0215	1125.79	25.1413	1125.79	25.1413	101.958
AOS7 321	370.816	18648.3	2.70711	12.9859	2.25083	2.1064	2.42108	0.198029	0.760753	0.31422	1164.72	8.10629	1150.9	16.671	1125.81	45.8116	1125.81	45.8116	103.456
AOS7 1069	626.569	2800.27	8.06751	12.4476	1.40256	1.6872	5.90365	0.158548	0.976081	0.165335	948.703	8.61096	1003.71	37.6545	1126.7	116.111	1126.7	116.111	84.2023
AOS7 263	645.207	40240.3	3.65193	12.9856	1.63781	2.16	1.80311	0.202937	0.680882	0.377615	1191.08	7.40472	1168.27	12.5153	1127.08	33.2498	1127.08	33.2498	105.678
AOS7 777	1234.04	35163.8	7.45617	12.9422	1.08548	1.93933	1.37267	0.182066	0.818968	0.596623	1078.25	8.13153	1094.77	9.19627	1128.64	21.9386	1128.64	21.9386	95.5354
AOS7 353	142.987	13294	1.24013	13.0321	6.59107	1.96695	7.04243	0.184569	2.45507	0.348611	1091.89	24.6594	1104.26	47.4407	1129.58	131.609	1129.58	131.609	96.6633
AOS7 640	1026.91	18923	19.9584	12.9316	1.21254	1.90714	1.68096	0.178937	0.94125	0.559949	1061.16	9.20943	1083.59	11.1975	1129.83	27.7215	1129.83	27.7215	93.9226
AOS7 593	1202.64	34565.7	3.41255	13.1737	1.29065	1.98688	1.51756	0.186393	0.780883	0.514565	1101.81	7.90872	1111.06	10.2505	1130.1	25.9063	1130.1	25.9063	97.4967
AOS7 851	80.5718	1502.92	2.2032	11.5641	8.884	2.07573	9.44117	0.194691	1.66044	0.175872	1146.74	17.4434	1140.83	64.7839	1130.47	185.471	1130.47	185.471	101.439
AOS7 3	258.813	7321.24	1.79064	12.9403	8.67069	1.80402	9.1486	0.1691	1.748	0.191067	1007.15	16.2987	1046.91	59.8338	1131.73	179.153	1131.73	179.153	88.9923
AOS7 184	685.102	21040.3	2.54806	13.3987	1.27972	1.95149	1.76854	0.182848	0.862406	0.487638	1082.52	8.59394	1098.96	11.8738	1132.55	30.7227	1132.55	30.7227	95.5822
AOS7 493	463.137	15188.7	4.18062	12.9266	1.39062	1.65596	2.34619	0.155133	1.82161	0.776412	929.671	15.7705	991.833	14.8543	1132.87	29.4215	1132.87	29.4215	82.0633
AOS7 915	703.271	40040.1	2.54299	12.8466	1.15847	2.12659	1.34265	0.199056	0.643533	0.479301	1170.25	6.88692	1157.48	9.27293	1134.5	23.4537	1134.5	23.4537	103.151
AOS7 888	286.072	7644.49	2.9308	12.8682	3.04441	2.03532	3.5275	0.190475	0.988606	0.280257	1123.95	10.1967	1127.4	24.0218	1134.89	67.3907	1134.89	67.3907	99.0356
AOS7 674	361.465	11191.9	1.54567	12.4074	3.48682	2.14326	3.66906	0.200575	0.811931	0.221291	1178.41	8.74429	1162.88	25.408	1134.91	71.2334	1134.91	71.2334	103.833
AOS7 23	188.171	3943.07	2.25436	12.3822	5.99646	2.18899	6.84423	0.204669	1.95337	0.285404	1200.36	21.3939	1177.54	47.738	1136.74	130.658	1136.74	130.658	105.596
AOS7 1191	137.607	8593.04	3.86353	12.6472	1.67603	2.28154	2.34555	0.213313	1.60615	0.684764	1246.44	18.2033	1206.59	16.5601	1136.85	34.0197	1136.85	34.0197	109.64
AOS7 241	267.584	11486	1.41452	13.0679	3.30716	2.27337	3.66069	0.212486	1.3125	0.358539	1242.05	14.8276	1204.06	25.8203	1137.43	67.986	1137.43	67.986	109.198
AOS7 10	207.404	3225.85	1.60745	12.3695	2.86371	2.20233	4.6227	0.205828	0.942565	0.203899	1206.55	10.3717	1181.78	32.2915	1137.6	90.0576	1137.6	90.0576	106.062
AOS7 631	164.937	7866.33	2.13467	12.739	5.47498	2.2192	5.71936	0.207382	1.61871	0.283023	1214.85	17.9231	1187.12	40.0544	1137.82	109.206	1137.82	109.206	106.771
AOS7 913	292.005	22474.4	2.13844	12.7569	2.1859	1.93682	2.53987	0.180662	1.20969	0.476279	1070.59	11.9325	1093.9	17.0096	1141.44	44.4234	1141.44	44.4234	93.7931
AOS7 278	276.815	7921.24	0.933713	12.6028	2.70473	2.13272	2.98937	0.198746	0.84894	0.283987	1168.58	9.07335	1159.47	20.6672	1143.35	56.985	1143.35	56.985	102.207
AOS7 742	282.023	15572.1	1.83324	12.7652	1.6894	1.97073	2.02581	0.183613	0.934383	0.461238	1086.68	9.3441	1105.56	13.6464	1143.75	35.7481	1143.75	35.7481	95.0109
AOS7 655	346.769	42252.2	3.08867	12.9182	1.80815	2.00797	1.97727	0.186964	0.761467	0.385111	1104.91	7.73198	1118.21	13.4031	1145.02	36.2838	1145.02	36.2838	96.4966
AOS7 855	659.195	3523.36	3.28436	12.2609	0.569271	1.94729	4.54772	0.181217	0.784876	0.172587	1073.62	7.76226	1097.51	30.5184	1146.09	89.0469	1146.09	89.0469	93.6763
AOS7 789	836.762	35561.6	1.21034	12.9925	1.26006	1.87354	1.52749	0.174321	0.831582	0.54441	1035.87	7.95767	1071.78	10.1127	1146.45	25.4586	1146.45	25.4586	90.3548
AOS7 483	915.677	11845.2	2.24045	12.7934	1.1615	1.73017	1.71261	0.160865	1.21737	0.71083	961.58	10.8748	1019.81	11.0206	1147.89	23.9464	1147.89	23.9464	83.7692
AOS7 959	1442.7	121388	2.35227	12.8383	0.944809	2.0223	1.12423	0.187877	0.602442	0.535872	1109.87	6.14238	1123.03	7.63837	1149.46	18.8488	1149.46	18.8488	96.5556
AOS7 1012	356.697	10609.1	5.16741	12.6329	1.71821	2.11203	1.96721	0.19615	0.917949	0.466625	1154.61	9.70376	1152.74	13.557	1150.1	34.5527	1150.1	34.5527	100.392
AOS7 801	887.847	28457.1	1.9601	12.9306	1.55698	1.90444	1.76783	0.176827	0.658734	0.372623	1049.62	6.38064	1082.64	11.7705	1150.57	32.576	1150.57	32.576	91.2261
AOS7 1094	1009.29	31858.7	4.23449	12.6871	1.16907	2.01815	1.53523	0.187375	0.981001	0.638992	1107.14	9.97955	1121.64	10.4239	1150.69	23.4677	1150.69	23.4677	96.2151
AOS7 626	521.823	10684.4	2.78333	12.7286	0.908088	2.13532	1.34696	0.198151	0.941232	0.698784	1165.38	10.0346	1160.31	9.31486	1151.7	19.1439	1151.7	19.1439	101.188
AOS7 109	374.742	2006.13	3.39456	11.8452	2.05668	1.92771	4.15452	0.178841	0.988153	0.23785	1060.64	9.66396	1090.75	27.7826	1152.19	80.1378	1152.19	80.1378	92.0544
AOS7 224	116.396	6988.78	1.62188	12.7667	5.88906	2.08195	6.35895	0.193138	2.09786	0.329907	1138.35	21.8915	1142.88	43.6443	1152.32	119.268	1152.32	119.268	98.7877
AOS7 396	290.557	9733.39	1.35672	12.9215	2.22498	1.95459	2.80836	0.181308	1.33623	0.475803	1074.11	13.2206	1100.03	18.8665	1152.49	49.0347	1152.49	49.0347	93.1992
AOS7 919	145.589	4713.12	1.2442	12.3057	6.21252	1.77436	6.88098	0.164445	1.34143	0.194948	981.432	12.2121	1036.12	44.7136	1154.24	134.083	1154.24	134.083	85.0287
AOS7 899	289.601	6779.97	1.76872	12.6052	2.87193	2.03984	3.02002	0.188985	0.856428	0.283584	1115.88	8.77527	1128.91	20.5799	1154.9	57.4801	1154.9	57.4801	96.6207
AOS7 1010	327.414	9283.72	3.2011	12.5988	1.57244	1.95212	2.68935	0.180855	1.97709	0.735158	1071.64	19.5201	1099.18	18.0591	1154.94	36.1789	1154.94	36.1789	92.7877
AOS7 718	818	17310.1	20.7588	12.5041	0.911608	2.07053	1.42482	0.191816	0.750227	0.526541	1131.21	7.78373	1139.11	9.75601	1155.03	24.0368	1155.03	24.0368	97.9371
AOS7 1116	538.526	12706.9	4.69238	12.7564	0.713535	2.17723	1.29777	0.201609	0.761139	0.586497	1183.96	8.23245	1173.79	9.03016	1155.94	20.8745	1155.94	20.8745	102.424
AOS7 583	1115.64	40919	8.2846	12.8274	0.920402	2.06623	1.37042	0.191322	0.999543	0.72937	1128.53	10.348	1137.69	9.37713	1156.03	18.6013	1156.03	18.6013	97.6214
AOS7 889	233.544	13248.3	1.60163	12.8776	2.31149	2.17992	2.84878	0.201756	0.925241	0.324785	1184.75	10.0134	1174.65	19.8321	1156.94	53.452	1156.94	53.452	102.403
AOS7 196	806.889	24053.1	19.4714	13.2798	1.51795	1.9151	1.8279	0.177195	0.935463	0.51177	1051.63	9.07712	1086.36	12.1938	1157.52	31.1611	1157.52	31.1611	90.8525
AOS7 113	168.018	5272.01	2.69409	12.3425	5.49513	2.26604	5.58325	0.209612	0.670254	0.120047	1226.75	7.48733	1201.78	39.3532	1158.03	110.008	1158.03	110.008	105.934
AOS7 1098	411.882	15576.1	1.2587	12.5689	6.03732	1.77563	6.20332	0.164168	0.89998	0.14508	979.899	8.18134	1036.58	40.3156	1159	121.831	1159	121.831	84.5469
AOS7 610	225.433	13082.3	3.22358	12.8241	4.29213	1.9108	4.5617	0.176518	0.900737	0.197456	1047.92	8.71178	1084.86	30.4151	1160.66	88.6945	1160.66	88.6945	90.2871
AOS7 1085	644.644	31515.6	2.28522	12.5857	1.36113	2.32783	1.58344	0.215034	0.713943	0.450881	1255.58	8.14519	1220.82	11.2471	1160.74	28.0274	1160.74	28.0274	108.171
AOS7 1131	563.657	23437.9	3.16852	12.7415	0.988102	1.99315	1.27403	0.184051	0.616861	0.48418	1089.07	6.18121	1113.19	8.61454	1161.45	22.1087	1161.45	22.1087	93.7682
AOS7 1064	324.092	26353.3	2.81597	13.0599	3.58193	1.91643	3.73049	0.176852	1.01782	0.272837	1049.75	9.85998	1086.82	24.8957	1162.73	71.1759	1162.73	71.1759	90.2834
AOS7 870	1475.99	28474.9	2.73577	12.7216	1.23564	2.12694	1.56325	0.196063	0.799175	0.511226	1154.13	8.44503	1157.59	10.7972	1164.91	26.6156	1164.91	26.6156	99.0746
AOS7 503	1016.67	32697.7	2.57255	12.6867	1.98667	1.97628	2.17892	0.182138	0.78924	0.362217	1078.64	7.83897	1107.45	14.6918	1165.32	40.2308	1165.32	40.2308	92.5621
AOS7 434	367.986	12978.3	1.01313	12.6415	2.45472	2.22435	2.59864	0.204999	0.727007	0.279764	1202.12	7.97302	1188.74	18.2047	1165.32	49.4379	1165.32	49.4379	103.158
AOS7 358	657.216	7804.99	5.8769	12.6171	1.76247	1.99424	1.95873	0.18371	0.776262	0.396308	1087.21	7.76629	1113.56	13.2471	1166.22	35.6299	1166.22	35.6299	93.2252
AOS7 805	272.767	10535.5	2.42368	12.5723	1.86321	2.32735	2.67461	0.213963	0.928532	0.347165	1249.89	10.5499	1220.67	18.9978	1170.22	49.6509	1170.22	49.6509	106.809
AOS7 344	107.521	3895.82	1.65362	12.4915	8.03378	2.1025	8.41684	0.193255	2.01265	0.239122	1138.98	21.0128	1149.63	57.9796	1170.64	162.064	1170.64	162.064	97.296
AOS7 1135	540.671	20205.5	0.713739	12.5969	1.32563	2.20902	1.61053	0.202825	0.825447	0.512532	1190.48	8.97277	1183.9	11.2575	1172.78	27.3533	1172.78	27.3533	101.509
AOS7 484	847.024	26458.9	3.11834	12.7294	1.05792	2.07916	1.45127	0.190791	0.982684	0.67712	1125.66	10.1497	1141.96	9.95057	1173.94	21.1355	1173.94	21.1355	95.8869
AOS7 1045	914.939	53012.9	3.65999	12.7504	1.01156	2.16427	1.33114	0.19857	0.850763	0.639122	1167.63	9.08609	1169.64	9.24495	1174.25	20.2735	1174.25	20.2735	99.4366
AOS7 1143	103.368	3361.59	3.83826	12.0603	9.05746	2.0858	9.23396	0.191311	1.41718	0.153475	1128.47	14.671	1144.14	63.4582	1174.86	180.901	1174.86	180.901	96.0517
AOS7 47	184.249	4210.71	2.09816	12.3374	4.79077	2.20354	5.0603	0.202089	0.761994	0.150583	1186.53	8.25803	1182.17	35.3568	1175.07	99.031	1175.07	99.031	100.976
AOS7 1093	126.353	4253.68	0.856989	12.059	3.23061	1.98619	5.46502	0.182093	1.6635	0.30439	1078.4	16.519	1110.83	36.9246	1175.74	103.034	1175.74	103.034	91.7213
AOS7 385	350.277	11002.9	1.43091	12.4939	3.52703	2.23764	3.7877	0.205087	1.26185	0.333145	1202.59	13.8435	1192.92	26.5868	1176.31	70.6623	1176.31	70.6623	102.234
AOS7 891	189.619	5537.57	3.16393	12.5135	1.94127	1.85076	2.84241	0.169583	1.19021	0.418731	1009.81	11.1248	1063.7	18.7394	1176.84	51.0549	1176.84	51.0549	85.8074
AOS7 751	901.402	30659.7	28.2187	12.7759	1.40364	2.13734	1.50792	0.195788	0.484431	0.321258	1152.66	5.11309	1160.96	10.4312	1177.38	28.2347	1177.38	28.2347	97.9003
AOS7 1063	276.824	9654.98	3.62098	12.805	2.82752	2.06383	3.01302	0.188976	0.833506	0.276635	1115.83	8.54006	1136.89	20.6111	1178.2	57.2718	1178.2	57.2718	94.7058
AOS7 518	294.641	9082.07	4.64828	12.4626	3.89318	2.18915	4.01481	0.20041	0.779211	0.194084	1177.52	8.38615	1177.6	27.9902	1178.62	77.9113	1178.62	77.9113	99.907
AOS7 381	573.197	18660.6	1.39503	12.5739	1.78816	2.34749	2.33219	0.214823	1.41542	0.606907	1254.46	16.1351	1226.8	16.608	1179.36	36.653	1179.36	36.653	106.368
AOS7 171	724.624	21914.6	1.85391	12.6968	1.32512	2.16807	1.6693	0.198288	0.958721	0.574324	1166.11	10.2269	1170.86	11.6001	1180.53	27.0355	1180.53	27.0355	98.7792
AOS7 812	561.59	24626.3	14.0309	12.5152	1.0979	2.10766	1.35724	0.192528	0.659484	0.4859	1135.06	6.86355	1151.31	9.34688	1182.93	23.4622	1182.93	23.4622	95.9531
AOS7 118	407.519	9414.84	2.38649	12.418	0.854955	1.8763	1.37672	0.171186	0.911506	0.662087	1018.64	8.58858	1072.76	9.11914	1185.33	20.3832	1185.33	20.3832	85.9379
AOS7 798	310.806	9145.7	1.12025	12.5568	1.61329	2.17172	1.89161	0.198125	0.859102	0.454164	1165.24	9.15799	1172.03	13.1521	1185.48	33.3136	1185.48	33.3136	98.2929
AOS7 110	1452.99	41078.9	4.23222	12.6523	0.805392	2.25548	1.05303	0.205718	0.604506	0.574061	1205.97	6.64884	1198.5	7.40806	1185.93	17.0332	1185.93	17.0332	101.689
AOS7 1115	353.628	9893.9	5.82355	12.5133	1.63436	2.23178	2.05999	0.203478	0.799943	0.388324	1193.98	8.71881	1191.08	14.4455	1186.69	37.4912	1186.69	37.4912	100.614
AOS7 818	254.562	7695.44	2.19333	12.3016	1.8133	2.39727	2.33962	0.218556	0.716407	0.306206	1274.24	8.28315	1241.79	16.765	1186.79	44.0089	1186.79	44.0089	107.369
AOS7 540	260.932	13521	3.34056	12.6507	1.68149	2.13973	1.83122	0.195042	0.710139	0.387796	1148.63	7.47149	1161.74	12.6724	1187.14	33.3516	1187.14	33.3516	96.7562
AOS7 367	360.025	23133.3	3.29819	12.5417	3.88689	2.25516	3.95673	0.205505	0.739598	0.186922	1204.83	8.12771	1198.4	27.8407	1187.7	76.7923	1187.7	76.7923	101.442
AOS7 1144	439.499	14450.7	4.83715	12.4722	2.10815	2.31556	2.38012	0.210896	1.04775	0.440207	1233.59	11.7635	1217.07	16.8799	1188.76	42.223	1188.76	42.223	103.771
AOS7 490	649.972	55920.4	1.09573	12.6672	1.30584	2.18774	1.65503	0.199052	0.968372	0.585107	1170.22	10.3631	1177.15	11.5337	1190.74	26.4949	1190.74	26.4949	98.2768
AOS7 251	417.785	10515.8	3.3664	12.5512	2.25785	2.23512	2.5606	0.203348	1.08996	0.425667	1193.28	11.8735	1192.13	17.965	1190.89	45.7423	1190.89	45.7423	100.201
AOS7 616	384.122	27544.5	2.11692	12.6646	2.22434	2.13412	2.37405	0.193983	0.80738	0.340085	1142.91	8.45593	1159.92	16.4158	1192.67	44.0631	1192.67	44.0631	95.8281
AOS7 127	116.072	3697.31	2.78486	12.1243	8.85918	2.26029	9.21054	0.205439	0.93086	0.101065	1204.47	10.2268	1200	64.9254	1192.79	181.201	1192.79	181.201	100.979
AOS7 924	78.1244	2973.64	5.261	11.8218	8.14814	2.32788	8.65197	0.211464	2.79803	0.323398	1236.61	31.4848	1220.83	61.5275	1193.9	161.802	1193.9	161.802	103.577
AOS7 380	1014.76	44873.7	3.18961	12.5512	1.4234	2.19723	1.63642	0.199588	0.806164	0.492638	1173.11	8.64657	1180.16	11.4194	1193.97	28.0987	1193.97	28.0987	98.253
AOS7 653	588.164	27490.2	3.97927	12.5755	1.23764	2.28454	1.52851	0.207516	0.8209	0.53706	1215.57	9.09425	1207.52	10.7954	1193.99	25.4512	1193.99	25.4512	101.807
AOS7 995	731.091	11208	17.3299	12.8318	1.23368	1.9576	1.57026	0.177768	0.735593	0.468453	1054.77	7.15729	1101.06	10.5536	1194.58	27.3713	1194.58	27.3713	88.296
AOS7 651	347.796	16420.7	1.0403	12.5055	2.28204	2.01084	2.41072	0.182402	0.676162	0.280481	1080.08	6.72409	1119.17	16.3495	1196.72	45.6331	1196.72	45.6331	90.2538
AOS7 419	466.213	5648.97	1.18289	12.4612	2.42445	1.99326	2.89078	0.180785	0.940059	0.325192	1071.26	9.27821	1113.23	19.5487	1197.01	53.9379	1197.01	53.9379	89.4947
AOS7 1035	154.808	4584.48	3.8701	12.1502	4.40719	2.2226	4.97219	0.201542	1.84547	0.371158	1183.6	19.9551	1188.19	34.834	1197.43	91.0996	1197.43	91.0996	98.8448
AOS7 245	405.891	13774.4	2.33364	12.6308	1.92565	2.19601	2.14309	0.199023	0.871331	0.406577	1170.07	9.32347	1179.78	14.953	1198.47	38.6292	1198.47	38.6292	97.6301
AOS7 4	523.594	25114.5	2.99443	12.7242	2.22847	2.20277	2.38684	0.199365	0.720006	0.301656	1171.91	7.71529	1181.92	16.67	1201.16	44.8786	1201.16	44.8786	97.5648
AOS7 203	293.247	14645.8	2.79269	12.6746	2.39385	2.2422	2.64143	0.202852	0.856269	0.324169	1190.62	9.30884	1194.35	18.5504	1201.97	49.2713	1201.97	49.2713	99.0559
AOS7 597	82.0877	6011.92	1.48124	12.3985	5.9647	1.98187	6.36244	0.179266	2.01338	0.316448	1062.96	19.7302	1109.36	42.9635	1202.32	119.038	1202.32	119.038	88.4092
AOS7 977	254.488	6286.82	2.94874	12.161	3.92413	2.02325	4.2145	0.183003	1.12364	0.266612	1083.36	11.2052	1123.35	28.6462	1202.37	80.0749	1202.37	80.0749	90.102
AOS7 303	640.024	21428.9	26.508	12.988	1.2476	2.1838	1.64272	0.197501	1.03117	0.627724	1161.88	10.9634	1175.89	11.4414	1202.62	25.1823	1202.62	25.1823	96.6126
AOS7 291	463.347	34426.5	3.40117	12.4564	1.31257	2.2301	2.14382	0.201677	1.66376	0.77607	1184.32	18.0002	1190.55	15.03	1202.73	26.6238	1202.73	26.6238	98.4699
AOS7 555	1306.76	10666.8	1.1472	12.3547	0.835366	2.3166	1.13944	0.209453	0.751008	0.659103	1225.9	8.38416	1217.38	8.08142	1203.16	16.8773	1203.16	16.8773	101.89
AOS7 625	387.987	9000.55	1.95987	12.3523	3.03222	2.21941	3.13499	0.200377	0.619291	0.197542	1177.35	6.66413	1187.18	21.948	1205.98	60.5452	1205.98	60.5452	97.6253
AOS7 71	236.214	7661.47	4.62811	12.1804	2.22022	2.40467	2.80566	0.217016	1.54254	0.549797	1266.09	17.7318	1244	20.1235	1206.82	46.1604	1206.82	46.1604	104.911
AOS7 579	520.507	15817.5	3.49495	12.29	0.893656	2.33927	1.29861	0.211069	0.706927	0.544372	1234.51	7.94235	1224.3	9.23739	1207.23	21.4352	1207.23	21.4352	102.26
AOS7 645	228.492	6735.74	1.08371	12.2464	3.1403	2.17607	3.37893	0.196316	0.672862	0.199135	1155.5	7.11793	1173.42	23.5109	1207.51	65.2088	1207.51	65.2088	95.6925
AOS7 962	252.454	7870.13	2.64669	12.1995	3.39237	1.90919	4.04191	0.172237	0.491596	0.121625	1024.42	4.65626	1084.3	26.9398	1207.54	79.0349	1207.54	79.0349	84.8355
AOS7 931	319.6	14666.1	2.11166	12.3474	2.79726	2.18857	2.90765	0.197346	0.596909	0.205289	1161.04	6.34212	1177.41	20.2672	1208.49	56.051	1208.49	56.051	96.0742
AOS7 509	484.166	20644.8	2.34924	12.3721	1.48743	2.266	1.67147	0.20427	0.616605	0.3689	1198.22	6.74226	1201.77	11.7758	1209.05	30.577	1209.05	30.577	99.1041
AOS7 884	264.003	8417.16	2.3061	12.4508	4.62219	1.94823	5.22501	0.175537	2.09339	0.400648	1042.55	20.1513	1097.84	35.0727	1210	94.2733	1210	94.2733	86.1609
AOS7 406	344.24	15607.5	2.66017	12.5266	1.46896	2.23749	1.87091	0.201504	0.530613	0.283612	1183.4	5.7366	1192.87	13.1298	1210.92	35.3148	1210.92	35.3148	97.7273
AOS7 548	599.093	22482.4	1.26142	12.6354	1.92172	2.21206	2.14474	0.199116	0.534671	0.249294	1170.57	5.72334	1184.86	14.9986	1211.92	40.862	1211.92	40.862	96.5878
AOS7 911	737.554	20024.1	3.30794	12.3427	1.34341	2.32236	1.61565	0.208898	0.728282	0.450766	1222.94	8.11264	1219.14	11.4678	1213.27	28.3781	1213.27	28.3781	100.797
AOS7 12	235.533	14396.6	2.89433	12.3723	2.50182	2.34136	2.91773	0.210411	1.06917	0.366441	1231.01	11.9813	1224.94	20.7625	1215.13	53.4181	1215.13	53.4181	101.307
AOS7 206	118.409	4616.09	1.59003	12.2592	4.24751	2.44639	5.30434	0.219693	0.787666	0.148495	1280.26	9.14591	1256.36	38.2497	1216.51	103.231	1216.51	103.231	105.24
AOS7 755	1159.67	16039.1	59.5821	12.338	0.865205	2.23769	1.49702	0.20094	1.18625	0.792406	1180.37	12.795	1192.93	10.506	1216.63	17.9663	1216.63	17.9663	97.0197
AOS7 624	304.98	10205.9	0.850914	12.3148	1.90897	2.41488	2.13241	0.216842	0.805316	0.377655	1265.17	9.25113	1247.03	15.3128	1216.73	38.8336	1216.73	38.8336	103.981
AOS7 119	267.137	10519	3.09155	12.3444	2.05756	2.23421	2.42537	0.200495	1.01926	0.42025	1177.98	10.9736	1191.84	17.0139	1217.94	43.2685	1217.94	43.2685	96.7191
AOS7 873	149.09	10245	2.46782	12.2766	5.94205	2.49874	5.99276	0.224107	0.689918	0.115125	1303.54	8.14239	1271.67	43.4842	1219.06	117.118	1219.06	117.118	106.93
AOS7 770	140.328	5919.53	0.422958	12.0263	4.70937	2.24425	5.07933	0.201228	1.66322	0.327448	1181.91	17.961	1194.99	35.6921	1219.58	94.3972	1219.58	94.3972	96.9116
AOS7 368	1558.14	12230.3	3.03724	12.2219	0.632424	2.0209	1.07756	0.181101	0.844969	0.784147	1072.99	8.35205	1122.56	7.31964	1220.67	13.1435	1220.67	13.1435	87.9018
AOS7 649	550.242	16632.7	1.12597	12.2935	2.63275	2.43329	2.99189	0.217553	1.41824	0.474028	1268.93	16.336	1252.49	21.534	1225.19	51.7356	1225.19	51.7356	103.571
AOS7 516	116.804	5712.99	2.70537	12.0428	4.03643	2.48169	4.50995	0.221866	1.08787	0.241216	1291.73	12.734	1266.71	32.6519	1225.32	85.9899	1225.32	85.9899	105.42
AOS7 948	383.767	9784.02	1.74416	12.1603	1.9811	2.24612	2.5655	0.200684	1.09475	0.426718	1178.99	11.7955	1195.57	18.0267	1226.5	45.563	1226.5	45.563	96.1263
AOS7 174	316.018	16007.3	2.49983	12.3449	3.3296	2.45819	3.52568	0.219163	0.721993	0.204781	1277.45	8.36675	1259.83	25.4525	1230.74	67.7486	1230.74	67.7486	103.796
AOS7 730	709.34	17518.3	0.502633	12.1029	1.64751	2.18692	1.82558	0.194783	0.666593	0.36514	1147.23	7.00553	1176.89	12.7208	1232.7	33.3355	1232.7	33.3355	93.0669
AOS7 806	258.061	16088.3	3.26994	12.2513	3.75449	2.3389	4.03349	0.208235	1.31534	0.326106	1219.41	14.6137	1224.19	28.6969	1233.49	74.8316	1233.49	74.8316	98.8583
AOS7 75	248.095	18705.9	1.46154	12.1078	3.03976	2.44107	3.14894	0.217283	0.80246	0.254835	1267.5	9.2337	1254.79	22.6858	1233.93	59.7294	1233.93	59.7294	102.721
AOS7 1059	810.852	23453.7	25.1114	12.3385	0.660355	2.22152	1.16566	0.197614	0.887397	0.761284	1162.49	9.43923	1187.85	8.16206	1235.19	14.8263	1235.19	14.8263	94.1143
AOS7 1041	62.3549	1571.27	1.42515	11.1492	8.93221	2.00308	9.45329	0.178114	2.92503	0.309419	1056.67	28.5078	1116.55	64.1093	1235.94	176.626	1235.94	176.626	85.4951
AOS7 748	381.77	11471	2.80348	12.3398	2.35629	2.57063	2.52378	0.228529	0.840584	0.333065	1326.78	10.0799	1292.32	18.4512	1236.39	46.6587	1236.39	46.6587	107.311
AOS7 848	106.706	4469.97	1.68988	11.8755	4.99514	2.10631	5.45143	0.187169	1.85154	0.339644	1106.02	18.8181	1150.87	37.5505	1237.24	100.583	1237.24	100.583	89.3945
AOS7 469	520.571	23364	2.80682	12.2663	1.38684	2.21395	1.57591	0.196731	0.742625	0.471235	1157.73	7.86981	1185.46	11.0232	1237.28	27.2725	1237.28	27.2725	93.5711
AOS7 1171	995.024	37020.3	3.63715	12.4971	1.60978	2.21068	1.80822	0.196438	0.791256	0.437588	1156.16	8.37474	1184.43	12.6425	1237.29	31.8829	1237.29	31.8829	93.4427
AOS7 275	153.838	10021.6	1.55169	12.049	1.02176	2.30449	1.71089	0.204421	1.13176	0.661502	1199.03	12.3828	1213.67	12.1156	1240.67	25.1286	1240.67	25.1286	96.6436
AOS7 1110	163.698	8212.29	3.10654	12.0786	3.27235	2.05813	3.44663	0.182261	0.91826	0.266423	1079.31	9.12566	1135	23.557	1243.93	65.0746	1243.93	65.0746	86.7665
AOS7 787	553.613	16459	3.17321	12.1939	1.32113	2.48627	1.73871	0.220095	0.827636	0.476005	1282.37	9.6244	1268.04	12.5912	1244.65	29.9526	1244.65	29.9526	103.031
AOS7 974	510.946	20256.6	1.37578	12.1224	0.877401	2.47372	1.41291	0.218792	0.812105	0.574775	1275.49	9.39795	1264.38	10.2168	1246.4	22.657	1246.4	22.657	102.334
AOS7 414	308.93	14095.6	3.88781	12.3656	3.75699	2.39321	3.91396	0.211285	0.817809	0.208947	1235.66	9.19587	1240.57	28.0367	1249.97	74.9232	1249.97	74.9232	98.8554
AOS7 592	523.265	21863.7	2.49415	12.3612	1.21567	2.38493	1.59896	0.210479	0.813927	0.509035	1231.37	9.12337	1238.09	11.4396	1250.68	26.9352	1250.68	26.9352	98.4561
AOS7 1167	444.768	24745.4	3.54958	12.135	2.79165	2.40296	2.87886	0.21193	0.606076	0.210527	1239.09	6.8322	1243.48	20.6443	1251.95	55.0598	1251.95	55.0598	98.9735
AOS7 67	162.008	7439.3	2.82841	12.0704	5.39625	2.18757	5.60871	0.192931	1.27897	0.228033	1137.23	13.3342	1177.09	39.103	1251.97	106.93	1251.97	106.93	90.8356
AOS7 643	635.753	15243.3	2.62284	12.1364	1.01556	2.41917	1.38925	0.213349	0.785545	0.565445	1246.63	8.90419	1248.31	9.98093	1252.07	22.4033	1252.07	22.4033	99.5661
AOS7 323	501.017	19771.4	3.36078	12.2874	1.87414	2.4478	2.097	0.215859	0.86965	0.414711	1259.96	9.95291	1256.78	15.118	1252.17	37.3207	1252.17	37.3207	100.622
AOS7 348	704.819	46385.8	2.37192	12.4504	1.41638	2.22508	1.62926	0.196069	0.725125	0.445063	1154.17	7.66272	1188.97	11.4142	1253.66	28.5424	1253.66	28.5424	92.0635
AOS7 153	592.599	12281	3.35165	12.2289	1.80282	2.08841	2.1759	0.18348	1.07384	0.493517	1085.96	10.7322	1145	14.941	1259.5	36.9935	1259.5	36.9935	86.2212
AOS7 445	231.889	8124.07	2.00288	11.8157	1.94878	2.4927	2.17529	0.218996	0.676822	0.311141	1276.57	7.83839	1269.91	15.7649	1259.52	40.3962	1259.52	40.3962	101.353
AOS7 467	222.559	16013.1	2.25228	12.0216	5.91788	2.32382	6.00763	0.204051	0.819341	0.136383	1197.04	8.95109	1219.59	42.673	1260.54	116.406	1260.54	116.406	94.9628
AOS7 1148	275.318	14294.1	3.17655	11.9548	3.86682	2.26772	3.95868	0.199097	0.807048	0.203868	1170.47	8.63829	1202.31	27.9019	1260.84	75.7447	1260.84	75.7447	92.8319
AOS7 1168	879.225	35955.8	2.62067	12.2182	0.607978	2.3905	0.950064	0.209762	0.722832	0.760825	1227.55	8.07948	1239.76	6.80165	1261.87	12.0457	1261.87	12.0457	97.2801
AOS7 1076	166.226	5602.22	1.60425	11.829	4.14369	2.4927	4.69946	0.218528	0.562517	0.119698	1274.09	6.50317	1269.92	34.0682	1263.71	91.1697	1263.71	91.1697	100.821
AOS7 1070	512.29	44986.2	3.34441	12.3178	2.15296	2.49359	2.30068	0.218089	0.762688	0.331505	1271.77	8.80278	1270.17	16.6755	1268.3	42.3776	1268.3	42.3776	100.273
AOS7 709	358.977	11502.5	2.47167	11.7906	1.90532	2.50809	2.11471	0.219014	0.743611	0.351637	1276.66	8.61246	1274.38	15.3528	1271.4	38.6138	1271.4	38.6138	100.414
AOS7 1066	215.997	1202.49	1.4286	10.8544	2.76799	2.37383	11.7106	0.207152	1.17043	0.099946	1213.63	12.9476	1234.76	83.8534	1272.68	228.06	1272.68	228.06	95.3596
AOS7 621	832.733	27124	3.91671	12.088	0.96024	2.53967	1.23199	0.221391	0.700117	0.568281	1289.22	8.18076	1283.48	8.97559	1274.71	19.7712	1274.71	19.7712	101.138
AOS7 1138	737.416	80579.4	11.6229	12.0633	1.49252	2.49139	1.71483	0.217051	0.817656	0.476813	1266.27	9.4003	1269.53	12.4256	1275.89	29.3776	1275.89	29.3776	99.2463
AOS7 1033	559.971	25532.9	1.55729	12.0276	1.07173	2.52224	1.51096	0.219616	1.00757	0.666839	1279.84	11.6959	1278.47	10.9867	1276.98	21.9536	1276.98	21.9536	100.224
AOS7 928	639.702	28388.4	25.951	11.9695	2.07498	2.53885	2.49917	0.221029	1.36521	0.546266	1287.31	15.931	1283.24	18.2074	1277.28	40.7986	1277.28	40.7986	100.786
AOS7 500	238.911	8389.86	3.53922	11.8445	2.93225	2.27019	3.22632	0.197523	0.94222	0.292042	1162	10.0186	1203.08	22.7457	1278.43	60.1442	1278.43	60.1442	90.8932
AOS7 431	493.954	18411.1	3.4384	12.2229	2.15766	2.42649	2.42705	0.21108	0.638434	0.26305	1234.57	7.17312	1250.48	17.4534	1278.81	45.6298	1278.81	45.6298	96.54
AOS7 243	147.986	11062.2	3.79695	12.1499	5.07394	2.57183	5.22029	0.223345	1.01925	0.195248	1299.52	11.9957	1292.66	38.1839	1282.11	99.7947	1282.11	99.7947	101.358
AOS7 892	890.428	22866.7	2.68861	12.144	1.06866	2.41242	1.2506	0.209219	0.631189	0.504707	1224.66	7.04003	1246.3	8.97741	1284.73	21.0242	1284.73	21.0242	95.3241
AOS7 73	485.729	13515.2	2.01758	11.7937	1.94211	2.34794	2.12481	0.203365	0.796087	0.374663	1193.37	8.67276	1226.93	15.1318	1287.24	38.3576	1287.24	38.3576	92.7076
AOS7 966	180.624	4257.14	2.90376	11.4056	6.79336	2.27933	6.90258	0.197342	0.900128	0.130405	1161.03	9.56367	1205.91	48.7525	1288.03	133.375	1288.03	133.375	90.1394
AOS7 349	558.591	33837	2.21345	12.1745	0.894283	2.41696	1.09108	0.209186	0.612283	0.561171	1224.48	6.82828	1247.65	7.83656	1288.7	17.5604	1288.7	17.5604	95.0166
AOS7 986	144.128	2305.41	1.86003	11.3237	8.29367	2.32726	8.59158	0.201243	1.21177	0.141042	1181.99	13.0867	1220.64	61.0921	1290.44	165.796	1290.44	165.796	91.5962
AOS7 876	584.968	27070.5	1.97055	11.9885	1.36709	2.48803	1.55742	0.21501	0.718258	0.461185	1255.46	8.19367	1268.56	11.2805	1291.66	26.8793	1291.66	26.8793	97.197
AOS7 639	380.693	12640.7	2.07355	11.8362	2.73304	2.53341	2.92842	0.218327	0.925615	0.31608	1273.03	10.6928	1281.68	21.3225	1297.04	54.0075	1297.04	54.0075	98.1488
AOS7 277	300.822	33556.6	6.34747	11.8256	2.40703	2.31339	2.72411	0.198982	1.18655	0.435575	1169.85	12.6943	1216.4	19.3145	1300.79	47.6561	1300.79	47.6561	89.9337
AOS7 1042	514.786	20297.1	1.21932	11.8728	1.9551	2.60832	2.32974	0.22411	0.974505	0.41829	1303.56	11.5012	1302.98	17.1015	1302.86	41.1131	1302.86	41.1131	100.053
AOS7 104	1014.2	10420.4	2.44317	11.577	0.717123	2.73484	1.13464	0.234425	0.59607	0.525336	1357.65	7.29717	1337.97	8.43644	1307.46	18.743	1307.46	18.743	103.838
AOS7 721	481.368	3057.44	2.05451	11.1265	1.38258	2.22004	2.38095	0.190271	0.759862	0.319142	1122.84	7.83032	1187.38	16.6694	1307.74	43.8087	1307.74	43.8087	85.8612
AOS7 993	1610.7	39144.8	7.84007	12.2475	0.695238	2.42354	0.948149	0.207564	0.621973	0.655987	1215.83	6.89179	1249.61	6.81535	1309.12	13.8903	1309.12	13.8903	92.8737
AOS7 502	129.06	7207.56	1.39298	11.6623	3.83537	2.68305	4.12192	0.229743	1.32079	0.320431	1333.15	15.9067	1323.8	30.4987	1309.52	75.7887	1309.52	75.7887	101.805
AOS7 865	499.951	33183.3	1.69007	11.7191	1.11067	2.62854	1.39108	0.224739	0.772435	0.555276	1306.87	9.13726	1308.66	10.2325	1312.41	22.4442	1312.41	22.4442	99.5775
AOS7 1105	341.428	16741.7	1.76129	11.7424	2.21523	2.69457	2.42987	0.230362	0.924881	0.38063	1336.4	11.163	1326.97	17.9963	1312.61	43.5952	1312.61	43.5952	101.812
AOS7 591	529.608	25541.7	2.18575	11.9893	1.86778	2.58634	2.01036	0.221081	0.646161	0.321416	1287.58	7.54164	1296.78	14.722	1312.85	36.9324	1312.85	36.9324	98.0752
AOS7 481	377.358	20872.6	1.42762	11.8014	0.881114	2.84837	1.40264	0.243267	1.06409	0.758629	1403.66	13.4219	1368.38	10.5417	1314.55	17.7236	1314.55	17.7236	106.779
AOS7 804	252.23	12271	1.27763	11.7109	0.919691	2.84076	1.77517	0.24241	0.746913	0.420756	1399.21	9.39449	1366.37	13.3325	1316.21	31.2272	1316.21	31.2272	106.306
AOS7 478	286.893	11870.5	3.08328	11.6938	0.706321	2.55967	1.54008	0.218042	0.876262	0.568973	1271.52	10.1118	1289.2	11.2451	1319.59	24.5469	1319.59	24.5469	96.357
AOS7 956	805.641	22894.5	3.30205	11.7265	0.741782	2.71465	1.07285	0.231107	0.754541	0.703306	1340.3	9.13101	1332.47	7.96111	1320.74	14.7783	1320.74	14.7783	101.481
AOS7 746	353.149	13862.4	2.42577	11.8522	2.76543	2.43861	3.09371	0.20756	0.80651	0.260693	1215.81	8.93642	1254.07	22.2812	1321.18	57.8843	1321.18	57.8843	92.0244
AOS7 565	111.157	4210.25	0.837333	11.1748	3.69232	2.94685	4.74185	0.250472	2.21536	0.467193	1440.91	28.6056	1394.04	35.9639	1323.86	81.2341	1323.86	81.2341	108.842
AOS7 163	135.306	7676.94	2.62159	11.6132	5.88115	2.72665	6.22273	0.231288	1.19021	0.191268	1341.25	14.4124	1335.75	46.2617	1327.77	118.331	1327.77	118.331	101.015
AOS7 761	536.632	17445.9	2.24539	11.7349	1.27296	2.72172	1.47893	0.230869	0.65862	0.445335	1339.05	7.96354	1334.4	10.9823	1327.77	25.6347	1327.77	25.6347	100.849
AOS7 1051	323.426	8730.47	1.5611	11.5996	2.07396	2.45449	2.84502	0.208053	0.977945	0.34374	1218.44	10.8573	1258.75	20.5282	1329.15	51.7171	1329.15	51.7171	91.6705
AOS7 894	200.708	6400.03	2.41334	11.5728	5.09919	2.4719	5.24897	0.2094	0.64823	0.123497	1225.62	7.23526	1263.85	37.9638	1330.34	100.844	1330.34	100.844	92.1281
AOS7 1095	686.45	41351.3	1.8462	11.6	1.33103	2.68272	1.71389	0.227194	1.0263	0.598812	1319.78	12.2483	1323.71	12.6778	1330.9	26.5616	1330.9	26.5616	99.164
AOS7 435	252.088	9666.69	2.60827	11.5737	5.03039	2.78424	5.13225	0.235644	0.755815	0.147268	1364.01	9.29175	1351.32	38.3594	1332.1	98.2502	1332.1	98.2502	102.396
AOS7 64	248.094	7175.76	2.14469	11.5857	1.59017	2.67426	2.46692	0.226332	0.890503	0.360978	1315.25	10.5948	1321.37	18.2333	1332.14	44.5133	1332.14	44.5133	98.732
AOS7 538	218.519	5989.76	1.85041	11.5196	5.44953	2.7849	5.72976	0.235167	1.34197	0.23421	1361.52	16.4707	1351.49	42.833	1336.49	107.764	1336.49	107.764	101.873
AOS7 320	136.896	7529.01	2.2488	11.5272	8.07279	2.74528	8.31602	0.231813	1.39377	0.167601	1344	16.9085	1340.81	61.9707	1336.55	158.755	1336.55	158.755	100.557
AOS7 25	322.238	13777.9	2.41258	11.5112	1.83055	2.74341	2.08086	0.231572	0.722712	0.347314	1342.74	8.76013	1340.3	15.4857	1337.24	37.727	1337.24	37.727	100.411
AOS7 800	269.047	6623.05	2.11954	11.5372	1.89795	2.82034	2.04726	0.237956	0.612279	0.299072	1376.06	7.58682	1360.96	15.3474	1338.14	37.7657	1338.14	37.7657	102.834
AOS7 637	340.759	13434.5	1.05164	11.6053	2.77593	2.76242	2.89223	0.232898	0.641716	0.221876	1349.67	7.81448	1345.45	21.565	1339.56	54.5123	1339.56	54.5123	100.755
AOS7 57	632.201	19595.8	2.87543	11.6932	1.47872	2.70092	1.74311	0.226909	0.776068	0.445219	1318.28	9.25246	1328.71	12.9176	1346.4	30.1384	1346.4	30.1384	97.9116
AOS7 436	178.236	10461.1	1.25812	11.482	5.34749	2.88854	5.61202	0.242185	1.48204	0.264082	1398.05	18.6268	1378.92	42.3539	1350.26	104.528	1350.26	104.528	103.539
AOS7 486	415.675	15583.1	2.26627	11.5768	1.84931	2.55496	2.34007	0.214	1.01286	0.432832	1250.09	11.5097	1287.85	17.0785	1352.21	40.7008	1352.21	40.7008	92.4477
AOS7 308	137.576	6159.53	3.43711	11.7625	6.65111	2.29917	7.2424	0.19185	0.936687	0.129334	1131.39	9.71972	1212.03	51.2918	1359.49	138.584	1359.49	138.584	83.2216
AOS7 236	74.2499	2433.92	4.56559	10.9712	7.43384	2.56206	7.76754	0.213677	1.72665	0.222291	1248.38	19.5966	1289.88	56.7876	1360.47	146.132	1360.47	146.132	91.7606
AOS7 442	1445.6	46058.7	2.9015	11.3863	0.410144	2.70774	0.674592	0.225321	0.527997	0.782691	1309.93	6.25896	1330.58	5.00233	1364.79	8.08676	1364.79	8.08676	95.9801
AOS7 15	432.869	14976.5	1.16397	11.5547	2.38831	2.93436	2.69029	0.244033	0.795794	0.295802	1407.63	10.0632	1390.82	20.3764	1365.95	49.4923	1365.95	49.4923	103.051
AOS7 632	190.734	14360.6	2.54912	11.4684	1.77256	2.79296	2.05573	0.232174	0.693751	0.337471	1345.88	8.42681	1353.66	15.3715	1366.78	37.2599	1366.78	37.2599	98.4712
AOS7 581	395.911	30944.4	1.33857	11.3835	1.12167	2.73216	1.34297	0.227002	0.642161	0.478165	1318.77	7.65855	1337.25	9.98288	1367.77	22.7059	1367.77	22.7059	96.417
AOS7 270	579.063	33368.7	3.16477	11.4655	1.01605	2.75404	1.15819	0.228627	0.519626	0.448655	1327.3	6.23328	1343.18	8.6276	1369.39	19.9215	1369.39	19.9215	96.9259
AOS7 268	204.195	4465.68	1.29775	11.1072	3.23957	3.09688	3.85115	0.256786	0.871104	0.226193	1473.38	11.4736	1431.92	29.5675	1371.66	72.2003	1371.66	72.2003	107.416
AOS7 534	555.669	9806.19	5.14665	11.4488	1.15484	2.69073	1.51235	0.223022	0.568128	0.375658	1297.82	6.67848	1325.91	11.1959	1372.41	26.9644	1372.41	26.9644	94.5653
AOS7 856	509.751	8884.48	1.16477	11.2781	1.1428	2.81159	1.62582	0.232954	0.593701	0.365171	1349.96	7.23118	1358.63	12.1778	1373.12	29.1155	1373.12	29.1155	98.3138
AOS7 1177	129.623	5823.1	3.03746	11.2723	7.50288	2.8912	7.85582	0.239161	0.589982	0.0751013	1382.33	7.34039	1379.62	59.3348	1376.24	150.835	1376.24	150.835	100.443
AOS7 635	135.878	6940.94	3.75536	11.2558	2.57756	2.91212	3.04633	0.240699	0.926062	0.303993	1390.33	11.5816	1385.06	23.0292	1377.78	55.8016	1377.78	55.8016	100.911
AOS7 221	197.222	7214.7	3.27938	11.2715	4.39494	2.82292	4.81947	0.233061	1.10718	0.229731	1350.52	13.4903	1361.64	36.1506	1379.97	90.1922	1379.97	90.1922	97.866
AOS7 266	618.29	13013.1	1.21618	11.3184	0.917963	2.69236	1.23036	0.222172	0.745829	0.606185	1293.34	8.74005	1326.36	9.10971	1380.92	18.8038	1380.92	18.8038	93.6579
AOS7 1005	444.104	14266.9	2.20611	11.3814	2.11348	2.85761	2.3733	0.235724	0.906573	0.381989	1364.43	11.1482	1370.82	17.853	1381.61	42.1467	1381.61	42.1467	98.7566
AOS7 1192	814.557	19966.9	3.58033	11.2868	0.783805	2.60673	1.45037	0.214802	1.02287	0.705246	1254.35	11.6593	1302.53	10.644	1383.63	19.7519	1383.63	19.7519	90.6568
AOS7 77	113.821	6239.92	1.10505	11.0307	4.66665	3.01933	4.98614	0.248751	1.5152	0.303882	1432.03	19.4571	1412.52	38.05	1384.02	91.2919	1384.02	91.2919	103.469
AOS7 685	90.7484	5822.36	3.14064	10.8787	7.28714	2.77161	7.55452	0.227852	1.36906	0.181224	1323.23	16.3775	1347.92	56.4272	1388.14	142.812	1388.14	142.812	95.3239
AOS7 397	66.4599	2946.68	18.2919	11.0577	7.53792	2.71109	8.83518	0.222867	1.19298	0.135026	1297.01	14.0159	1331.5	65.6284	1388.22	168.368	1388.22	168.368	93.4294
AOS7 733	553.873	25627.5	1.1412	11.1952	1.46793	2.89983	1.66546	0.238366	0.772674	0.46394	1378.2	9.58761	1381.87	12.5752	1388.36	28.3224	1388.36	28.3224	99.2677
AOS7 1043	525.231	22610.6	2.16313	11.371	2.03782	2.88296	2.25212	0.236955	0.863535	0.383432	1370.85	10.6638	1377.47	16.98	1388.56	39.9294	1388.56	39.9294	98.7246
AOS7 17	273.418	6810.08	2.02305	11.2738	0.988045	3.13761	1.49341	0.257805	1.00164	0.670707	1478.6	13.2346	1441.96	11.4995	1389.16	21.2604	1389.16	21.2604	106.439
AOS7 359	180.556	8447.62	2.17109	11.2831	3.49345	3.23515	3.89941	0.265362	1.05955	0.271721	1517.22	14.3241	1465.62	30.254	1392.46	72.0198	1392.46	72.0198	108.96
AOS7 860	620.02	20466.4	2.10767	11.1848	1.10504	2.98129	1.42453	0.243933	0.863692	0.606301	1407.11	10.9182	1402.86	10.8317	1397.22	21.7189	1397.22	21.7189	100.708
AOS7 998	338.534	14317.8	4.42377	11.612	2.47104	3.0471	2.64748	0.249166	0.922435	0.34842	1434.18	11.8611	1419.51	20.2424	1398.38	47.5769	1398.38	47.5769	102.56
AOS7 257	260.154	14001.5	0.67203	11.237	2.06274	3.28335	2.29318	0.267961	0.802029	0.349745	1530.44	10.9263	1477.11	17.8503	1402.13	41.1659	1402.13	41.1659	109.151
AOS7 923	373.733	14768.6	1.64557	11.1434	1.20671	2.98761	1.67541	0.243555	0.979791	0.584807	1405.15	12.3704	1404.47	12.7463	1404.25	26.0314	1404.25	26.0314	100.064
AOS7 350	531.92	12324.4	1.63476	11.3058	1.70182	2.78549	2.02939	0.226505	0.993341	0.489477	1316.16	11.8257	1351.65	15.1638	1409.08	33.8752	1409.08	33.8752	93.4052
AOS7 630	160.967	2098.82	4.07146	10.5443	9.50267	0.807147	10.6414	0.0656089	2.22395	0.20899	409.646	8.82689	600.852	48.2965	1409.82	199.698	1409.82	199.698	29.0567
AOS7 1156	365.423	19296.9	6.21216	11.1567	2.06847	3.00915	2.23093	0.244576	0.734053	0.329034	1410.44	9.29903	1409.94	17.0039	1410	40.3232	1410	40.3232	100.031
AOS7 1083	821.335	55869.5	3.49866	11.2756	1.65946	2.95038	1.82253	0.239601	0.723136	0.396776	1384.62	9.01043	1394.95	13.822	1411.58	32.0124	1411.58	32.0124	98.0907
AOS7 357	511.181	37423.2	2.43269	11.4264	1.29298	2.79374	1.5592	0.226755	0.813805	0.521938	1317.47	9.69702	1353.86	11.6592	1412.63	25.4454	1412.63	25.4454	93.2638
AOS7 588	551.414	20293.5	1.56441	11.2469	1.73342	2.56148	2.06193	0.207535	1.09135	0.529289	1215.67	12.0914	1289.71	15.059	1416.03	33.4561	1416.03	33.4561	85.8509
AOS7 668	794.429	41367.6	1.72779	11.0311	1.18838	3.13585	1.57122	0.254024	0.966983	0.615435	1459.19	12.6272	1441.53	12.097	1416.39	23.6815	1416.39	23.6815	103.022
AOS7 433	343.633	16511.1	2.95482	11.2675	1.71374	3.14078	1.93377	0.254323	0.811906	0.419856	1460.73	10.6121	1442.74	14.8943	1417.14	33.5591	1417.14	33.5591	103.076
AOS7 1166	76.8599	2923.15	2.79506	10.6457	8.61898	3.09937	9.25564	0.250879	2.09505	0.226354	1443.01	27.0872	1432.54	71.171	1417.83	172.707	1417.83	172.707	101.776
AOS7 766	675.291	28762.2	1.85584	11.1436	1.08932	2.95905	1.38539	0.239349	0.766587	0.553337	1383.31	9.54374	1397.17	10.5143	1419.2	22.0582	1419.2	22.0582	97.4715
AOS7 734	556.14	17594.4	2.90897	10.9937	0.99675	3.04984	1.42367	0.246619	0.990292	0.695592	1421.01	12.6292	1420.19	10.8867	1419.78	19.5495	1419.78	19.5495	100.087
AOS7 1154	171.618	11128.8	1.99443	11.0336	3.27973	3.19958	3.37475	0.258682	0.559275	0.165723	1483.1	7.4096	1457.06	26.1129	1420.11	63.625	1420.11	63.625	104.435
AOS7 1056	99.7113	1212.28	2.12712	9.97214	27.8167	0.856528	28.075	0.0692052	2.10045	0.0748156	431.366	8.76411	628.226	132.262	1421.32	545.886	1421.32	545.886	30.3496
AOS7 727	181.274	9679.39	2.04016	10.8758	2.28666	3.02742	3.15169	0.244488	1.52509	0.483895	1409.99	19.3144	1414.56	24.0603	1422.26	52.7079	1422.26	52.7079	99.1368
AOS7 235	162.766	4160.59	0.676263	10.9128	8.38445	2.88521	8.61307	0.232749	1.13712	0.132023	1348.89	13.84	1378.05	65.0345	1424.35	163.376	1424.35	163.376	94.7024
AOS7 646	452.948	30146.9	2.95646	11.1731	1.82881	2.91164	1.9722	0.234716	0.72724	0.368746	1359.17	8.91193	1384.94	14.907	1425.69	35.0129	1425.69	35.0129	95.3342
AOS7 686	665.386	29472.1	1.3037	10.8859	1.49062	3.1417	1.64518	0.253015	0.672106	0.40853	1454.01	8.74876	1442.97	12.6722	1427.55	28.6719	1427.55	28.6719	101.853
AOS7 601	185.136	7525.32	1.82057	11.1429	3.18041	2.67204	3.34343	0.215038	0.651322	0.194807	1255.6	7.43086	1320.76	24.7083	1428.91	62.6186	1428.91	62.6186	87.8711
AOS7 758	559.362	36352.6	3.08567	11.1835	2.4003	3.05063	2.63326	0.245335	1.0755	0.408431	1414.37	13.6586	1420.39	20.1394	1430.24	45.8814	1430.24	45.8814	98.8908
AOS7 670	410.33	21668.9	2.28641	10.7894	1.53508	3.18477	1.71134	0.255265	0.747186	0.436609	1465.57	9.79496	1453.47	13.225	1436.64	29.361	1436.64	29.361	102.014
AOS7 595	227.309	9833.86	2.17506	11.1378	1.45927	3.20479	1.72841	0.256868	0.866867	0.501541	1473.8	11.4207	1458.32	13.3769	1436.65	28.5159	1436.65	28.5159	102.586
AOS7 882	627.298	23900.1	13.1555	11.2292	1.37118	3.08359	1.6063	0.246953	0.688695	0.428747	1422.75	8.79246	1428.62	12.3166	1438.19	27.6684	1438.19	27.6684	98.9259
AOS7 613	148.828	10366.3	1.14151	11.0184	4.0471	3.22089	4.35662	0.256859	0.850234	0.195159	1473.75	11.2012	1462.2	33.7685	1446.27	81.4106	1446.27	81.4106	101.9
AOS7 747	389.627	20134.3	1.57026	11.1531	1.93427	3.12018	2.06367	0.248825	0.69337	0.33599	1432.42	8.90588	1437.68	15.8697	1446.28	37.0201	1446.28	37.0201	99.0412
AOS7 769	209.915	21468	3.87128	10.9098	3.45604	3.32746	3.63438	0.264772	1.07456	0.295665	1514.21	14.5014	1487.52	28.3826	1450.47	66.1025	1450.47	66.1025	104.394
AOS7 835	360.674	10335.5	4.08483	10.8282	0.794917	3.14572	1.11284	0.250206	0.758063	0.681195	1439.54	9.78002	1443.95	8.5742	1451.27	15.5056	1451.27	15.5056	99.1918
AOS7 1036	587.244	26542.6	1.64574	10.9947	1.46625	2.96882	1.75622	0.235849	0.927484	0.528115	1365.08	11.4102	1399.68	13.34	1453.58	28.3752	1453.58	28.3752	93.9119
AOS7 577	577.626	17687.1	1.92737	10.7487	0.877868	3.38114	1.19003	0.268526	0.703439	0.591111	1533.32	9.59914	1500.03	9.32557	1454.13	18.2612	1454.13	18.2612	105.446
AOS7 1178	399.494	28061.2	2.50352	11.0461	1.2074	3.05602	1.38931	0.242634	0.67668	0.487062	1400.38	8.51747	1421.74	10.6292	1454.7	23.0828	1454.7	23.0828	96.2661
AOS7 768	290.033	16708.9	1.63163	10.8787	2.37407	3.21414	2.51805	0.255037	0.719465	0.285723	1464.4	9.42487	1460.57	19.5031	1455.82	45.9034	1455.82	45.9034	100.59
AOS7 951	106.533	4420.14	1.40608	10.6186	2.44178	3.2195	2.76809	0.255308	1.01616	0.367099	1465.79	13.3229	1461.86	21.4488	1456.97	48.9737	1456.97	48.9737	100.606
AOS7 895	267.913	2630.83	1.30726	10.4797	3.73232	2.80206	5.07779	0.222202	2.51206	0.494716	1293.5	29.4413	1356.09	38.0159	1456.99	83.9582	1456.99	83.9582	88.7787
AOS7 1152	281.159	15189.4	1.24544	10.8285	1.15929	3.24753	1.58522	0.257481	0.857859	0.541162	1476.94	11.3234	1468.59	12.3071	1457.34	25.3503	1457.34	25.3503	101.345
AOS7 1030	742.018	48410.2	3.15988	10.9366	1.21352	3.17523	1.58301	0.251693	1.01522	0.641326	1447.2	13.1599	1451.16	12.2244	1457.76	23.0964	1457.76	23.0964	99.2758
AOS7 836	132.571	5316.36	1.15169	10.6198	5.14521	3.00601	5.57566	0.237678	0.811805	0.145598	1374.62	10.0497	1409.14	42.5068	1462.56	104.902	1462.56	104.902	93.9872
AOS7 198	212.722	7002.13	1.35315	11.178	2.60456	3.1781	2.76282	0.251174	0.741731	0.268469	1444.53	9.59889	1451.85	21.342	1463.4	50.5769	1463.4	50.5769	98.7102
AOS7 554	301.654	21077.8	3.05339	10.8591	2.70882	3.39552	2.89416	0.267341	0.962873	0.332695	1527.29	13.0936	1503.36	22.705	1470.61	51.816	1470.61	51.816	103.855
AOS7 1072	296.14	14460.9	1.44866	11.0121	1.49353	3.16429	1.69255	0.249099	0.572719	0.338376	1433.83	7.36265	1448.49	13.0596	1470.88	30.2339	1470.88	30.2339	97.4805
AOS7 331	275.033	42971.7	0.917462	10.9303	1.25268	3.6106	1.46733	0.28393	0.706297	0.481348	1611.12	10.0687	1551.87	11.6681	1472.91	24.4077	1472.91	24.4077	109.383
AOS7 272	1248.7	52433.1	3.77001	10.8751	0.504023	3.05749	0.724267	0.240283	0.496336	0.685294	1388.17	6.19865	1422.11	5.54167	1474.11	10.0077	1474.11	10.0077	94.1703
AOS7 1162	796.241	61143.1	1.94335	10.7821	0.587636	3.16748	0.848302	0.248901	0.566803	0.668161	1432.8	7.28197	1449.27	6.54677	1474.31	11.9748	1474.31	11.9748	97.1849
AOS7 784	538.665	12229.9	1.58613	10.8028	1.5276	3.18171	1.74234	0.249991	0.794556	0.456027	1438.43	10.2438	1452.73	13.4616	1474.52	29.4206	1474.52	29.4206	97.5522
AOS7 177	182.594	5312.08	1.11735	10.6611	2.66796	3.27035	2.86511	0.256213	0.847113	0.295665	1470.44	11.1378	1474.03	22.2829	1480.01	51.8973	1480.01	51.8973	99.3535
AOS7 111	809.663	66274.2	3.38536	10.8835	0.761889	3.28838	0.982356	0.257462	0.59617	0.606878	1476.84	7.86878	1478.31	7.64884	1481.21	14.8	1481.21	14.8	99.7053
AOS7 765	933.154	49280.6	4.21596	10.8112	0.684692	3.33195	0.982616	0.260855	0.694815	0.707107	1494.21	9.26662	1488.57	7.67427	1481.35	13.1703	1481.35	13.1703	100.868
AOS7 271	603.446	22108.5	2.78107	10.7902	0.600001	3.4061	0.886306	0.266629	0.631884	0.712941	1523.67	8.57461	1505.8	6.95702	1481.56	11.7802	1481.56	11.7802	102.842
AOS7 756	473.75	14912.7	3.48817	10.7612	1.96589	3.41871	2.29181	0.267533	1.07236	0.467907	1528.27	14.5907	1508.7	18.0062	1482.15	38.3905	1482.15	38.3905	103.111
AOS7 976	77.0748	1648.99	1.72599	9.91179	19.341	1.03662	20.4587	0.0811118	1.29315	0.0632079	502.756	6.25435	722.232	106.119	1482.37	391.061	1482.37	391.061	33.9157
AOS7 1073	437.711	14344.2	1.75747	10.8172	0.558962	3.19319	0.968282	0.249737	0.74041	0.764664	1437.12	9.53796	1455.51	7.48721	1483.27	11.8247	1483.27	11.8247	96.8885
AOS7 1091	509.348	21876.1	3.51851	10.6402	1.70926	3.53227	1.94784	0.27616	0.930199	0.477554	1571.99	12.9763	1534.47	15.4154	1483.94	32.4302	1483.94	32.4302	105.934
AOS7 447	476.419	5513.3	2.13001	10.4489	1.05308	2.93317	5.02575	0.229256	4.90684	0.976341	1330.6	58.9945	1390.51	38.074	1484.47	20.5913	1484.47	20.5913	89.6348
AOS7 312	583.867	20043.5	1.86485	11.1128	1.20054	3.19405	1.57775	0.249587	0.864224	0.547756	1436.35	11.1276	1455.72	12.2011	1484.92	25.0098	1484.92	25.0098	96.7288
AOS7 117	170.569	11264.4	2.30196	10.6408	4.23327	3.46451	4.47994	0.270692	1.21069	0.270248	1544.31	16.626	1519.18	35.3139	1485.13	81.7519	1485.13	81.7519	103.985
AOS7 728	685.249	22871.6	1.43894	10.6415	1.04136	3.31051	1.38601	0.258423	0.733267	0.529051	1481.77	9.70702	1483.53	10.8088	1486.86	22.2782	1486.86	22.2782	99.6579
AOS7 106	679.907	31113.8	1.03065	10.6531	1.16382	3.40468	1.39462	0.265633	0.72068	0.516756	1518.6	9.75068	1505.47	10.9462	1487.87	22.6129	1487.87	22.6129	102.065
AOS7 326	975.467	61894.4	2.97524	10.8528	0.681952	3.30991	0.955434	0.258123	0.665124	0.696148	1480.23	8.7968	1483.39	7.45052	1488.72	12.9886	1488.72	12.9886	99.43
AOS7 1197	312.445	10848.7	17.9172	10.5406	2.51788	3.37672	2.79866	0.262983	0.676088	0.241576	1505.08	9.0751	1499.01	21.9277	1491.24	51.417	1491.24	51.417	100.928
AOS7 970	211.994	53231.4	3.86277	10.7343	2.04872	3.38707	2.2453	0.263776	0.898318	0.400088	1509.13	12.0869	1501.41	17.6034	1491.33	38.9552	1491.33	38.9552	101.193
AOS7 259	1226.2	47382	1.39937	10.7971	0.861994	3.33153	1.13401	0.259373	0.71861	0.63369	1486.63	9.54073	1488.47	8.85645	1491.9	16.6052	1491.9	16.6052	99.6468
AOS7 341	178.353	15045.7	1.31459	10.8937	4.51693	3.40672	4.72826	0.264953	1.32672	0.280594	1515.14	17.9141	1505.95	37.1318	1493.85	85.9204	1493.85	85.9204	101.425
AOS7 1077	176.442	16264	2.37868	10.7162	3.46419	3.28712	3.52173	0.255644	0.5249	0.149046	1467.52	6.88913	1478.01	27.4247	1493.91	65.9161	1493.91	65.9161	98.2337
AOS7 468	555.153	44016.2	2.1907	10.7478	1.05491	3.31278	1.27411	0.257472	0.672787	0.528047	1476.9	8.88031	1484.07	9.93767	1495.14	20.4718	1495.14	20.4718	98.7799
AOS7 29	404.481	13915.6	25.5796	10.6364	1.54917	3.57777	1.96209	0.277885	0.675185	0.344115	1580.7	9.46487	1544.61	15.5719	1496.38	34.8512	1496.38	34.8512	105.635
AOS7 489	355.975	13960.9	2.24033	10.7242	1.65301	3.31669	1.89477	0.257408	0.859659	0.4537	1476.57	11.3446	1484.99	14.7833	1497.84	31.9363	1497.84	31.9363	98.5795
AOS7 1149	448.457	18689	1.32658	10.5325	1.16409	3.54711	1.35375	0.275247	0.63125	0.466299	1567.38	8.7831	1537.79	10.7232	1498.14	22.648	1498.14	22.648	104.621
AOS7 297	610.88	22692.2	2.22164	10.9238	0.733685	3.28837	0.997865	0.254714	0.592666	0.593934	1462.74	7.75598	1478.3	7.7696	1501.52	15.1762	1501.52	15.1762	97.4174
AOS7 141	790.947	24963.6	1.84192	10.7878	0.798938	3.45064	1.22439	0.266981	0.846246	0.691154	1525.46	11.4954	1516.01	9.63921	1503.66	16.7217	1503.66	16.7217	101.45
AOS7 90	433.692	30926.3	1.38699	10.5912	0.795137	3.46203	1.22794	0.267791	0.923659	0.752203	1529.58	12.577	1518.61	9.67426	1504.16	15.289	1504.16	15.289	101.69
AOS7 1019	208.547	13311.5	2.34486	10.5859	2.10048	3.5295	2.4854	0.27296	0.821528	0.330542	1555.81	11.356	1533.85	19.6672	1504.5	44.3298	1504.5	44.3298	103.41
AOS7 1157	223.685	9804.91	1.79912	10.6224	1.53046	3.33142	1.86541	0.257479	0.527257	0.28265	1476.93	6.95957	1488.44	14.5691	1505.69	33.808	1505.69	33.808	98.0901
AOS7 362	452.942	18849.4	1.31399	10.658	1.43278	3.41313	1.72352	0.263255	0.599647	0.34792	1506.48	8.05564	1507.42	13.5356	1509.55	30.5135	1509.55	30.5135	99.796
AOS7 199	399.706	16897.4	3.1596	10.9734	1.36332	3.42734	1.603	0.263863	0.827611	0.516287	1509.57	11.1384	1510.69	12.6009	1513.05	25.9119	1513.05	25.9119	99.77
AOS7 785	713.562	23161	2.63484	10.631	0.893698	3.42494	1.16619	0.263246	0.700068	0.600302	1506.43	9.40445	1510.14	9.16554	1516.14	17.5961	1516.14	17.5961	99.3594
AOS7 964	310.54	3518.39	0.479023	10.1025	1.64437	2.7689	4.5118	0.212819	3.99091	0.884549	1243.82	45.1452	1347.19	33.6691	1516.17	39.709	1516.17	39.709	82.0367
AOS7 752	1107.38	45695.8	1.11303	10.6304	0.73782	3.50567	0.947859	0.269414	0.591073	0.623587	1537.83	8.08679	1528.49	7.48847	1516.41	13.9786	1516.41	13.9786	101.413
AOS7 474	419.169	47080.3	7.36596	10.6952	1.53954	3.29343	1.90799	0.253077	1.09313	0.572925	1454.33	14.232	1479.5	14.8621	1516.6	29.503	1516.6	29.503	95.8939
AOS7 376	186.034	8903.87	1.21197	10.5595	3.70553	3.61028	3.82457	0.277378	0.803387	0.210059	1578.14	11.2459	1551.8	30.4198	1516.91	70.5632	1516.91	70.5632	104.036
AOS7 642	794.735	61056.4	1.84362	10.6667	1.05541	3.52772	1.3189	0.27103	0.787877	0.597372	1546.03	10.8302	1533.45	10.4345	1516.95	19.953	1516.95	19.953	101.917
AOS7 607	273.9	14962.2	3.61865	10.6589	1.09933	3.42908	1.54634	0.263133	0.768294	0.496846	1505.85	10.3175	1511.08	12.1568	1519.22	25.3085	1519.22	25.3085	99.1199
AOS7 937	217.045	10229	1.4782	10.4401	4.45738	3.3121	4.58309	0.254025	0.89923	0.196206	1459.2	11.7425	1483.91	35.7588	1520.21	84.7832	1520.21	84.7832	95.9869
AOS7 65	1339.15	62828.7	3.19241	10.7152	1.05539	3.39226	1.29056	0.260128	0.711234	0.551105	1490.5	9.46463	1502.61	10.121	1520.53	20.3051	1520.53	20.3051	98.0248
AOS7 391	706.317	17310.6	2.80178	10.6739	0.787019	3.45252	1.43426	0.263097	1.1853	0.826414	1505.67	15.9157	1516.44	11.2929	1532.32	15.2029	1532.32	15.2029	98.2603
AOS7 1112	663.302	37767.1	2.49407	10.6132	1.02634	3.53962	1.39047	0.269635	0.857781	0.6169	1538.95	11.7434	1536.12	11.0089	1533.01	20.6005	1533.01	20.6005	100.387
AOS7 997	897.184	65834.1	4.1629	10.9155	0.669261	3.40289	0.97665	0.259197	0.696734	0.713392	1485.73	9.24533	1505.06	7.66456	1533.18	12.8838	1533.18	12.8838	96.9055
AOS7 1092	73.2702	1420.9	1.29948	9.46677	25.2271	1.19547	25.9534	0.0909868	4.65873	0.179503	561.37	25.0465	798.496	144.462	1534.67	488.665	1534.67	488.665	36.5791
AOS7 729	171.552	11354.3	1.11323	10.3055	2.57093	3.42236	2.7879	0.26029	1.02416	0.36736	1491.33	13.6356	1509.54	21.9102	1536	48.7986	1536	48.7986	97.0918
AOS7 1188	366.515	20234	1.14299	10.5363	1.18304	3.55568	1.61241	0.26934	0.841059	0.521617	1537.45	11.5045	1539.7	12.779	1543.6	25.8607	1543.6	25.8607	99.6015
AOS7 1039	230.444	7136.34	1.91081	10.3363	1.98532	3.19164	3.52775	0.241628	2.11488	0.599499	1395.16	26.5316	1455.14	27.2811	1544.65	53.0789	1544.65	53.0789	90.3217
AOS7 955	203.945	7856.64	0.741264	10.2887	1.78743	3.76148	2.01279	0.284084	0.664171	0.329976	1611.9	9.47222	1584.56	16.1466	1549.18	35.6925	1549.18	35.6925	104.049
AOS7 991	763.734	16812.7	1.39375	10.7436	0.851921	2.95751	1.35339	0.223196	0.883974	0.653154	1298.74	10.398	1396.78	10.2701	1550.59	19.2482	1550.59	19.2482	83.7578
AOS7 43	106.841	8695.5	1.98987	10.3674	3.24355	3.57519	3.43043	0.269772	0.916531	0.267177	1539.64	12.5527	1544.04	27.2253	1550.87	62.0979	1550.87	62.0979	99.2762
AOS7 578	490.718	7325.46	5.09368	10.1463	2.94481	1.21604	3.75396	0.0916535	1.37449	0.366144	565.309	7.43916	807.963	20.9195	1553.01	65.6049	1553.01	65.6049	36.4008
AOS7 1026	378.017	18050.9	1.85528	10.3241	1.4538	3.63178	1.7105	0.273064	0.883973	0.516792	1556.33	12.2228	1556.52	13.6192	1557.58	27.4779	1557.58	27.4779	99.92
AOS7 451	297.574	16119.4	6.5231	10.2097	1.40565	3.65203	1.73975	0.273966	0.636594	0.365911	1560.9	8.82511	1560.95	13.8687	1561.82	30.3647	1561.82	30.3647	99.9413
AOS7 168	813.687	18719.9	1.27009	10.3837	0.946465	3.48056	1.54086	0.259353	1.21012	0.785352	1486.53	16.0654	1522.82	12.1543	1574.41	17.858	1574.41	17.858	94.4181
AOS7 530	681.494	49118.3	1.84295	10.3978	0.899089	3.75768	1.23486	0.279056	0.798187	0.64638	1586.6	11.226	1583.75	9.9034	1580.75	17.6252	1580.75	17.6252	100.37
AOS7 717	430.227	21876.4	1.89976	10.0817	1.10436	3.70427	1.31934	0.274729	0.687094	0.520784	1564.76	9.546	1572.29	10.5491	1583.21	21.0627	1583.21	21.0627	98.8349
AOS7 302	308.49	17035.7	1.19742	10.71	1.54491	3.53169	1.80507	0.261516	0.895232	0.495955	1497.59	11.9635	1534.34	14.2848	1586.17	29.302	1586.17	29.302	94.4158
AOS7 22	138.659	8283.63	2.36403	10.1433	4.73441	3.90399	4.88725	0.287724	0.965235	0.1975	1630.15	13.9029	1614.51	39.5251	1594.97	89.5064	1594.97	89.5064	102.205
AOS7 1200	273.193	10723.6	3.24194	9.94258	1.81145	3.83932	3.43372	0.282896	2.9068	0.846547	1605.93	41.3214	1601.03	27.6676	1595.38	34.1282	1595.38	34.1282	100.661
AOS7 402	115.907	6182.02	1.37977	10.0591	5.58804	3.58933	5.73726	0.263954	0.881977	0.153728	1510.04	11.8733	1547.17	45.5922	1599.07	105.878	1599.07	105.878	94.4326
AOS7 586	366.208	24634.4	2.58326	10.2103	1.37494	3.7467	1.63122	0.275376	0.819458	0.502359	1568.03	11.406	1581.41	13.0745	1600.09	26.3176	1600.09	26.3176	97.9963
AOS7 244	158.188	17981.5	2.92839	10.3531	2.61454	3.58877	2.9252	0.262922	1.19266	0.407719	1504.77	16.0061	1547.05	23.2333	1606.09	49.8092	1606.09	49.8092	93.6916
AOS7 989	396.633	16554	1.78197	10.4275	1.36311	3.26395	1.63837	0.239038	0.802773	0.489984	1381.69	9.98375	1472.51	12.7349	1606.76	26.6277	1606.76	26.6277	85.9924
AOS7 253	402.816	19611.5	1.72013	10.1927	1.93936	3.98132	2.17638	0.291274	0.904259	0.415487	1647.89	13.1491	1630.39	17.6641	1608.69	36.9	1608.69	36.9	102.437
AOS7 413	310.72	12191.6	1.93255	10.2054	1.94389	3.51225	2.16605	0.2557	0.891138	0.411411	1467.8	11.6979	1529.98	17.1211	1617.82	36.7577	1617.82	36.7577	90.727
AOS7 441	546.644	34402.4	1.08546	9.95381	1.00327	4.01863	1.19525	0.292486	0.545684	0.456542	1653.94	7.96046	1637.97	9.71844	1618.33	19.7959	1618.33	19.7959	102.2
AOS7 695	597.629	36841.9	1.09285	9.91054	0.747199	4.05867	1.00113	0.294575	0.660252	0.659505	1664.35	9.68494	1646.04	8.15603	1623.53	13.9989	1623.53	13.9989	102.514
AOS7 426	273.738	10517.1	0.937182	10.2139	1.58767	3.91336	2.03793	0.282836	1.14963	0.564116	1605.63	16.3395	1616.45	16.4827	1631.36	31.2739	1631.36	31.2739	98.4229
AOS7 987	212.671	6421.36	1.5491	9.94268	4.99989	3.66294	5.30007	0.264533	0.700245	0.13212	1512.99	9.44318	1563.33	42.2993	1632.79	97.6824	1632.79	97.6824	92.663
AOS7 143	157.391	4548.68	0.705919	9.82406	2.25862	4.22878	2.69601	0.305224	0.682817	0.253269	1717.16	10.2933	1679.62	22.1429	1633.84	48.4614	1633.84	48.4614	105.1
AOS7 1054	291.2	14065.4	2.52331	9.95877	1.01614	4.09965	1.50734	0.295661	0.882708	0.585608	1669.76	12.9849	1654.23	12.3046	1635.37	22.6954	1635.37	22.6954	102.103
AOS7 657	170.559	11514	1.31915	9.92074	3.52662	4.15333	3.8033	0.299441	1.01915	0.267964	1688.53	15.1395	1664.87	31.134	1635.94	68.0759	1635.94	68.0759	103.215
AOS7 715	176.832	7927.5	0.819014	9.69022	2.68852	4.10037	2.8867	0.29539	1.0037	0.347697	1668.41	14.7543	1654.38	23.5685	1637.39	50.2692	1637.39	50.2692	101.894
AOS7 328	308.963	14028.3	2.21621	9.99921	1.19913	4.11251	1.65937	0.296	0.815118	0.491222	1671.44	12.0012	1656.79	13.5541	1639.06	26.8337	1639.06	26.8337	101.976
AOS7 1128	132.826	1167.34	1.80005	8.97235	4.38813	4.09729	8.05446	0.294879	1.05286	0.130717	1665.87	15.4562	1653.76	65.8312	1639.21	148.487	1639.21	148.487	101.626
AOS7 1106	1859.85	119897	6.69106	9.96799	0.777936	3.99516	1.1238	0.287413	0.810329	0.721062	1628.59	11.6619	1633.21	9.12673	1639.96	14.4555	1639.96	14.4555	99.3064
AOS7 930	468.472	47280.6	1.79938	9.93836	1.68011	3.92821	1.76417	0.282532	0.511523	0.289951	1604.1	7.26412	1619.51	14.2792	1640.39	31.3412	1640.39	31.3412	97.7881
AOS7 953	665.62	34063.9	0.948698	9.93471	0.937803	3.71566	1.18341	0.267138	0.660698	0.558301	1526.26	8.97911	1574.75	9.46827	1641.13	18.2244	1641.13	18.2244	93.0006
AOS7 663	244.255	24334.7	0.87809	9.86388	2.24446	4.03221	2.42252	0.289815	0.886078	0.365767	1640.6	12.8347	1640.72	19.7122	1641.65	41.8495	1641.65	41.8495	99.9363
AOS7 1053	206.233	7920.22	1.2217	9.84305	2.48088	3.94625	2.69857	0.283395	0.810174	0.300223	1608.44	11.5326	1623.22	21.8645	1643.24	47.7712	1643.24	47.7712	97.8822
AOS7 705	254.355	7785.83	1.54646	9.65839	2.49295	3.62098	3.00296	0.259902	1.08536	0.361429	1489.34	14.4333	1554.15	23.8975	1644.19	51.9588	1644.19	51.9588	90.5823
AOS7 531	387.689	10088.4	2.2014	9.93847	1.98192	3.51671	2.17939	0.252317	0.895299	0.410802	1450.41	11.6284	1530.98	17.2314	1644.93	36.8647	1644.93	36.8647	88.1746
AOS7 150	221.814	8319.34	0.93638	9.96137	2.502	4.28268	3.04831	0.307241	1.2174	0.399369	1727.12	18.4449	1690.04	25.098	1645.13	51.8541	1645.13	51.8541	104.984
AOS7 191	244.915	11726.4	3.48476	10.2323	1.37197	4.11485	1.76506	0.294599	0.845425	0.478979	1664.47	12.402	1657.25	14.4191	1648.91	28.7296	1648.91	28.7296	100.944
AOS7 971	289.316	19925.8	1.69878	9.82057	1.64381	4.21275	1.75806	0.301346	0.568464	0.323347	1697.98	8.48581	1676.51	14.4275	1650.53	30.8413	1650.53	30.8413	102.875
AOS7 281	105.479	1648.61	1.53952	9.13023	11.855	1.02129	12.2081	0.0729853	2.87292	0.23533	454.116	12.5975	714.563	62.7119	1652.3	220.7	1652.3	220.7	27.4839
AOS7 482	250.831	16122.1	1.75734	9.86941	1.57907	3.88774	1.96129	0.277813	1.15321	0.587984	1580.34	16.1626	1611.14	15.8415	1652.43	29.4045	1652.43	29.4045	95.6374
AOS7 527	545.784	60912.8	1.36146	9.81821	0.762976	3.69229	1.13733	0.263794	0.828337	0.728319	1509.22	11.1459	1569.7	9.08736	1652.79	14.4428	1652.79	14.4428	91.3137
AOS7 697	237.702	22317.2	1.72927	9.71617	2.4221	4.2297	2.63014	0.301654	0.97449	0.370509	1699.51	14.5583	1679.8	21.6027	1656.07	45.2622	1656.07	45.2622	102.623
AOS7 929	453.06	36609.5	2.27551	9.84646	0.973623	4.09759	1.11431	0.292225	0.500509	0.449167	1652.64	7.29642	1653.82	9.09515	1656.12	18.4429	1656.12	18.4429	99.7896
AOS7 582	441.414	36412.5	0.952431	9.72517	1.20675	4.19025	1.53769	0.296987	0.892435	0.580373	1676.35	13.1734	1672.11	12.6059	1667.59	23.1641	1667.59	23.1641	100.525
AOS7 1082	326.628	28552.5	0.784716	9.85974	1.84681	3.90054	1.97787	0.276435	0.700493	0.354165	1573.38	9.7795	1613.79	15.9862	1667.71	34.2178	1667.71	34.2178	94.3437
AOS7 148	342.663	4227.99	1.71117	9.62319	0.947579	4.16697	1.37709	0.294937	0.935522	0.679349	1666.15	13.7358	1667.55	11.277	1670.1	18.6866	1670.1	18.6866	99.7639
AOS7 1031	245.769	10378.3	1.04812	9.65749	1.78941	3.9871	2.14361	0.2818	1.00499	0.46883	1600.42	14.243	1631.57	17.4031	1672.75	35.0033	1672.75	35.0033	95.6759
AOS7 1046	87.8147	3402.49	1.16186	9.47762	3.10549	3.59657	4.59671	0.25417	1.7802	0.387277	1459.94	23.2572	1548.77	36.5358	1672.96	78.3741	1672.96	78.3741	87.2671
AOS7 570	302.553	10171.6	1.35361	9.52415	2.73228	3.47294	2.91218	0.245395	0.790378	0.271405	1414.68	10.0395	1521.09	22.9629	1673.25	51.8199	1673.25	51.8199	84.5469
AOS7 520	224.986	9587.14	1.54881	9.67706	4.59158	4.24448	4.73759	0.298355	0.896127	0.189152	1683.15	13.2748	1682.67	38.9514	1682.86	85.9323	1682.86	85.9323	100.017
AOS7 619	354.825	45397.5	1.12454	9.77242	1.65211	4.05646	1.79321	0.284924	0.670639	0.373987	1616.11	9.58649	1645.6	14.6081	1684.25	30.6991	1684.25	30.6991	95.9547
AOS7 226	504.309	20962.5	1.93974	9.853	1.0502	4.21186	1.21327	0.295651	0.593861	0.489471	1669.71	8.73563	1676.33	9.95595	1685.43	19.5264	1685.43	19.5264	99.0672
AOS7 550	1159.73	52630.9	2.40816	9.90547	0.980774	4.12376	1.30027	0.289433	0.827925	0.636733	1638.69	11.9801	1659.02	10.6264	1685.64	18.5037	1685.64	18.5037	97.2147
AOS7 1133	206.998	10866.1	1.91632	9.60314	3.87801	4.18521	3.9854	0.293414	0.823835	0.206713	1658.57	12.0477	1671.13	32.674	1687.72	71.9703	1687.72	71.9703	98.2726
AOS7 1101	141.95	6329.48	2.31288	9.44497	3.58122	4.29409	3.71595	0.300421	0.941435	0.25335	1693.39	14.0202	1692.23	30.6134	1691.57	66.3131	1691.57	66.3131	100.108
AOS7 345	207.179	9994.13	0.665758	9.78228	1.8344	4.00178	2.20713	0.279768	0.807829	0.366009	1590.19	11.3843	1634.56	17.9321	1692.9	37.8752	1692.9	37.8752	93.933
AOS7 408	500.275	34147	2.26442	9.90851	1.69287	4.03276	1.87932	0.281434	0.794067	0.422529	1598.58	11.2423	1640.83	15.2918	1696.17	31.3962	1696.17	31.3962	94.2464
AOS7 992	247.463	15309.9	1.54297	9.92084	2.11784	4.16668	2.25479	0.290374	0.708621	0.314274	1643.4	10.2796	1667.49	18.4655	1698.75	39.4428	1698.75	39.4428	96.7417
AOS7 844	270.011	8500.11	1.89218	9.55748	1.34543	4.40375	1.70428	0.306411	0.837167	0.491214	1723.02	12.6577	1713.05	14.1035	1701.66	27.3431	1701.66	27.3431	101.255
AOS7 81	543.214	23853.3	1.13157	9.51052	1.20576	4.53243	1.41669	0.315036	0.712375	0.502843	1765.44	11.0014	1736.94	11.7853	1703.57	22.5491	1703.57	22.5491	103.632
AOS7 723	112.541	13794.6	1.56879	9.41502	3.59204	4.42324	3.72796	0.30707	0.928396	0.249036	1726.27	14.0602	1716.7	30.8828	1705.83	66.4847	1705.83	66.4847	101.198
AOS7 673	437.995	76475.2	1.44011	9.35104	1.1435	4.43844	1.62951	0.30732	1.15441	0.708441	1727.5	17.494	1719.54	13.5042	1710.65	21.1582	1710.65	21.1582	100.985
AOS7 837	216.627	8657.54	1.63417	9.41795	2.20598	4.41381	2.89369	0.305432	1.20528	0.416522	1718.19	18.1789	1714.93	23.9592	1711.75	48.3995	1711.75	48.3995	100.376
AOS7 456	714.158	6367.31	4.10453	9.30663	1.00717	3.75657	1.39724	0.259722	0.639354	0.457583	1488.42	8.49756	1583.52	11.2051	1713.37	22.8491	1713.37	22.8491	86.8708
AOS7 525	285.149	14279.7	1.41393	9.39915	1.94346	4.4042	2.20707	0.303281	0.909869	0.412251	1707.56	13.6491	1713.13	18.2654	1720.73	36.9488	1720.73	36.9488	99.2345
AOS7 340	174.048	7676.89	1.61314	9.57462	2.05164	4.26365	2.21886	0.293525	0.790398	0.356218	1659.12	11.5621	1686.37	18.2516	1721.21	38.0956	1721.21	38.0956	96.3925
AOS7 364	588.156	24697.2	2.57337	9.43427	0.482515	4.6054	0.839409	0.314913	0.622916	0.742088	1764.84	9.61705	1750.25	7.00279	1733.64	10.3204	1733.64	10.3204	101.799
AOS7 575	357.859	17910	2.87688	9.2588	1.22083	4.45255	1.52243	0.304173	0.828063	0.543909	1711.97	12.4499	1722.17	12.624	1735.38	23.431	1735.38	23.431	98.6506
AOS7 521	563.663	36185.8	1.63856	9.46643	1.1592	4.8168	1.33884	0.327804	0.651269	0.486444	1827.73	10.3648	1787.84	11.2577	1742.37	21.4352	1742.37	21.4352	104.899
AOS7 944	328.068	11559.6	3.31169	9.35942	0.7322	4.63984	1.28237	0.31554	0.776924	0.605851	1767.91	12.0129	1756.47	10.7126	1743.66	18.6917	1743.66	18.6917	101.391
AOS7 1198	171.648	8110.24	2.11527	9.12915	2.89561	4.85956	3.34118	0.329618	0.792523	0.237198	1836.53	12.6653	1795.27	28.1432	1748.45	59.4466	1748.45	59.4466	105.037
AOS7 807	768.848	49353.8	7.76469	9.32438	0.61977	4.64979	0.906387	0.314992	0.650323	0.717489	1765.22	10.0421	1758.26	7.57447	1750.76	11.5562	1750.76	11.5562	100.826
AOS7 223	318.411	46531.3	1.85267	9.4358	1.46658	4.59795	1.68364	0.310248	0.826224	0.490738	1741.93	12.6117	1748.9	14.0424	1758.02	26.8282	1758.02	26.8282	99.0849
AOS7 437	400.712	27716.4	1.58781	9.34017	2.03484	4.50251	2.1245	0.303763	0.534385	0.251534	1709.94	8.02619	1731.43	17.6533	1758.28	37.6064	1758.28	37.6064	97.2508
AOS7 347	213.566	9881.06	2.00568	9.43937	1.3777	4.63807	1.81056	0.312756	0.783084	0.43251	1754.25	12.0268	1756.15	15.1245	1759.18	29.8511	1759.18	29.8511	99.7199
AOS7 394	319.057	12850.1	1.45743	9.56344	1.68456	4.41904	1.98013	0.297801	0.940088	0.474762	1680.39	13.9061	1715.92	16.3971	1760.32	31.8639	1760.32	31.8639	95.4595
AOS7 916	706.543	18059.5	1.71528	9.22282	0.789124	4.01425	2.0663	0.270414	1.88692	0.913185	1542.9	25.8914	1637.09	16.7982	1761.05	15.3964	1761.05	15.3964	87.6125
AOS7 379	215.807	15676.8	2.37333	9.2608	2.0269	4.92992	2.20541	0.331773	0.792814	0.359487	1846.97	12.7321	1807.39	18.6191	1762.83	37.6177	1762.83	37.6177	104.773
AOS7 822	1168.04	67644.4	8.96733	9.2838	0.722334	3.8732	1.05108	0.260605	0.757238	0.720438	1492.94	10.0915	1608.11	8.48265	1763.2	13.3237	1763.2	13.3237	84.6717
AOS7 738	102.784	7882.33	2.19108	9.13039	4.77365	4.21494	5.5407	0.283119	2.72511	0.491835	1607.05	38.7623	1676.93	45.5016	1766.3	88.1864	1766.3	88.1864	90.9842
AOS7 360	398.538	28837.3	3.25723	9.3438	1.51135	4.82544	1.74956	0.323086	0.876022	0.500711	1804.78	13.79	1789.34	14.7162	1772.17	27.6499	1772.17	27.6499	101.84
AOS7 713	381.887	20088.2	2.25507	9.0886	1.62212	4.59305	1.89917	0.307026	0.961212	0.506122	1726.06	14.5556	1748.01	15.8373	1775.14	29.8945	1775.14	29.8945	97.2351
AOS7 180	491.19	28952.3	1.77669	9.44089	0.887834	4.81974	1.24047	0.321934	0.747545	0.602631	1799.17	11.7358	1788.35	10.4316	1776.53	18.0624	1776.53	18.0624	101.274
AOS7 1016	407.949	30686.8	1.4483	9.17262	0.849193	4.78187	1.13762	0.318954	0.724203	0.636594	1784.62	11.2896	1781.72	9.55367	1779.1	16.0028	1779.1	16.0028	100.31
AOS7 496	554.814	16798.9	3.12642	9.14948	0.887103	4.47175	1.39848	0.297574	0.862621	0.616828	1679.27	12.7527	1725.74	11.6053	1783.35	20.0679	1783.35	20.0679	94.1637
AOS7 316	224.858	13573.1	0.982925	9.36679	1.27889	4.94864	1.72276	0.329151	0.761933	0.442274	1834.27	12.1634	1810.59	14.553	1784.23	28.1679	1784.23	28.1679	102.805
AOS7 969	567.981	81293	2.50005	9.17166	1.72439	4.75358	1.89299	0.315903	0.779216	0.411633	1769.69	12.0589	1776.74	15.8816	1785.81	31.4431	1785.81	31.4431	99.0972
AOS7 901	227.96	9409.4	0.732009	9.12197	1.01129	4.6358	1.27421	0.307225	0.737573	0.578848	1727.04	11.1745	1755.74	10.6428	1790.85	18.9252	1790.85	18.9252	96.4366
AOS7 842	425.208	25903.1	1.66577	9.13596	1.25762	4.88897	1.56159	0.323249	0.806025	0.516156	1805.58	12.693	1800.36	13.1644	1795.09	24.3479	1795.09	24.3479	100.584
AOS7 68	933.973	44656.7	2.99436	9.1571	0.83928	4.6361	1.10839	0.305947	0.699647	0.631226	1720.73	10.5662	1755.79	9.25786	1798.55	15.6448	1798.55	15.6448	95.6731
AOS7 1034	720.176	25405.7	1.32603	9.13341	0.988022	4.29137	1.38469	0.282951	0.941787	0.680141	1606.21	13.3898	1691.71	11.4033	1800.14	18.468	1800.14	18.468	89.2271
AOS7 218	445.728	13637.2	1.02183	9.12569	0.756888	4.97053	1.32066	0.327638	0.837405	0.63408	1826.92	13.322	1814.32	11.1642	1800.66	18.5783	1800.66	18.5783	101.458
AOS7 961	594.669	24888.6	5.07111	9.0633	0.982604	4.52233	1.1921	0.297626	0.630214	0.528658	1679.52	9.3181	1735.09	9.9128	1803.52	18.4022	1803.52	18.4022	93.1247
AOS7 377	556.888	62118.8	2.53105	9.16745	1.05164	5.01358	1.29024	0.329581	0.726853	0.563346	1836.35	11.6148	1821.62	10.9228	1805.59	19.3818	1805.59	19.3818	101.704
AOS7 622	113.461	7720.02	0.634411	9.0204	4.07088	4.51851	4.97522	0.296801	2.5705	0.516662	1675.43	37.9257	1734.38	41.3862	1807.03	77.468	1807.03	77.468	92.7173
AOS7 372	809.964	13224.2	3.78823	8.92176	0.527889	4.64298	1.12759	0.303949	0.892898	0.791864	1710.86	13.4172	1757.03	9.42067	1813.17	12.5075	1813.17	12.5075	94.3577
AOS7 135	368.118	25039.1	3.535	9.08573	1.6222	4.88068	1.8303	0.31943	0.830979	0.454013	1786.95	12.9688	1798.93	15.4255	1813.62	29.623	1813.62	29.623	98.5294
AOS7 838	696.18	39704.2	2.40958	9.03595	0.869346	4.94202	1.15885	0.322695	0.70978	0.612484	1802.88	11.1628	1809.46	9.78683	1817.83	16.6298	1817.83	16.6298	99.1774
AOS7 79	320.711	5380.42	2.15205	8.77075	0.859455	4.50483	1.79372	0.293678	1.18969	0.663254	1659.88	17.41	1731.86	14.9057	1820.73	24.3626	1820.73	24.3626	91.1655
AOS7 523	195.659	6734.29	1.0409	8.87082	2.09991	5.21437	2.54776	0.339868	1.4041	0.551113	1886.04	22.9598	1854.97	21.71	1821.08	38.5824	1821.08	38.5824	103.567
AOS7 775	176.836	2118.16	0.819394	8.52175	2.99746	4.37927	4.13913	0.284837	2.08459	0.50363	1615.68	29.7914	1708.44	34.228	1824.9	64.8791	1824.9	64.8791	88.5351
AOS7 1179	659.582	28195.5	3.63269	9.06984	0.670715	5.02074	0.953781	0.326445	0.576057	0.603972	1821.13	9.13914	1822.83	8.07618	1825.54	13.7865	1825.54	13.7865	99.7586
AOS7 711	111.204	7279.76	1.35481	8.76283	2.02182	5.59625	2.62159	0.363852	1.07304	0.409309	2000.41	18.4541	1915.52	22.5874	1825.6	43.3878	1825.6	43.3878	109.575
AOS7 42	454.199	14515.2	1.07812	8.97681	1.14527	4.85823	1.41329	0.314817	0.652913	0.461982	1764.37	10.0778	1795.04	11.9012	1831.64	22.7152	1831.64	22.7152	96.3269
AOS7 1068	158.49	21620.4	1.41194	9.05636	3.02399	5.11672	3.0813	0.330772	0.556832	0.180713	1842.12	8.92211	1838.89	26.1778	1836	54.9067	1836	54.9067	100.334
AOS7 166	275.459	13176.6	1.85195	8.95316	0.666594	5.12187	1.16151	0.330881	0.778452	0.670208	1842.65	12.4762	1839.74	9.86758	1837.22	15.614	1837.22	15.614	100.295
AOS7 910	359.232	32989.2	1.91214	8.8774	0.667148	5.18044	0.980219	0.333454	0.699561	0.713678	1855.1	11.2772	1849.41	8.34277	1843.78	12.4247	1843.78	12.4247	100.614
AOS7 239	859.181	54139.7	4.32841	9.11651	0.76715	5.13172	1.28567	0.329969	1.00925	0.784995	1838.23	16.1417	1841.37	10.9259	1845.7	14.4097	1845.7	14.4097	99.5956
AOS7 37	1279.72	69532	3.7488	9.07511	0.482337	5.09458	0.890807	0.327148	0.746143	0.837604	1824.54	11.8568	1835.2	7.56112	1848.09	8.80054	1848.09	8.80054	98.7259
AOS7 553	168.323	22844.1	0.819376	8.86803	1.82415	5.36773	2.27789	0.344463	1.32608	0.582152	1908.1	21.9019	1879.72	19.4995	1849.27	33.4966	1849.27	33.4966	103.181
AOS7 230	354.814	26813.5	1.37136	8.90039	1.37226	4.84515	1.84568	0.310061	1.23144	0.667203	1741.01	18.7883	1792.77	15.5357	1854.32	24.8488	1854.32	24.8488	93.8894
AOS7 98	147.949	5337.44	0.905735	8.60312	3.70505	5.04084	4.03744	0.322473	0.886334	0.219529	1801.79	13.9323	1826.21	34.2221	1854.94	71.2121	1854.94	71.2121	97.1349
AOS7 296	327.242	29210.9	3.59529	9.02297	2.12431	5.04463	2.24363	0.321945	0.661706	0.294927	1799.22	10.3885	1826.85	19.0148	1859.25	38.7274	1859.25	38.7274	96.7711
AOS7 875	204.922	22232.4	1.28003	8.86069	2.25045	4.89343	2.40642	0.312287	0.844523	0.350946	1751.95	12.9555	1801.12	20.291	1859.3	40.7065	1859.3	40.7065	94.2262
AOS7 1137	380.788	33563.7	1.94243	8.77607	1.26745	5.4346	1.39917	0.345792	0.588971	0.420943	1914.47	9.75551	1890.33	11.9996	1864.68	22.9106	1864.68	22.9106	102.671
AOS7 559	344.024	16373.3	2.93132	8.65043	1.25267	5.57044	1.48381	0.352559	0.752268	0.506984	1946.81	12.6406	1911.54	12.774	1874.26	23.0592	1874.26	23.0592	103.871
AOS7 854	1193.04	147333	32.2993	8.75391	0.941872	4.54317	1.32485	0.287221	0.931095	0.702793	1627.63	13.3929	1738.91	11.0259	1876.27	16.989	1876.27	16.989	86.748
AOS7 1061	424.05	24910.8	2.40805	8.78852	0.961367	5.25965	1.4781	0.332363	1.02269	0.691899	1849.82	16.4458	1862.34	12.6113	1877.11	19.235	1877.11	19.235	98.5465
AOS7 366	662.928	5061.11	1.10202	8.54261	0.824139	4.50496	2.38197	0.283954	2.18655	0.917961	1611.25	31.1731	1731.89	19.7951	1881.66	17.0206	1881.66	17.0206	85.6288
AOS7 778	897.193	110056	2.56927	8.63522	0.769508	5.80248	1.20414	0.361561	0.921008	0.764866	1989.57	15.7662	1946.78	10.4296	1902.33	13.9384	1902.33	13.9384	104.586
AOS7 246	369.421	10200.9	3.10843	8.66474	1.61043	5.37541	2.2282	0.333682	1.05469	0.473338	1856.2	17.0108	1880.94	19.0783	1909.14	35.2443	1909.14	35.2443	97.2269
AOS7 950	194.256	14039.8	1.18382	8.50645	2.67687	5.6059	2.8957	0.347052	0.811184	0.280134	1920.51	13.4725	1917.01	24.9565	1913.98	49.89	1913.98	49.89	100.341
AOS7 423	110.575	5487.42	2.66982	8.61697	2.1425	5.73396	2.42242	0.354032	0.548443	0.226403	1953.82	9.24407	1936.5	20.9472	1918.79	42.3224	1918.79	42.3224	101.826
AOS7 432	537.906	15416.8	2.4137	8.61672	0.816034	4.44346	1.76915	0.271999	1.49367	0.844286	1550.94	20.5899	1720.48	14.6646	1934.22	16.972	1934.22	16.972	80.184
AOS7 1146	141.348	3598.91	0.966429	8.16508	2.11041	5.8202	3.80818	0.35568	0.946793	0.248621	1961.67	16.0131	1949.42	33.0096	1937.21	66.0298	1937.21	66.0298	101.263
AOS7 903	483.016	45632.7	2.37412	8.4476	1.1531	5.1136	1.50864	0.31239	0.942905	0.625004	1752.45	14.4684	1838.37	12.8135	1937.83	21.0739	1937.83	21.0739	90.4338
AOS7 1165	179.334	19633.5	2.907	8.40425	1.3796	5.62807	1.6049	0.343365	0.71639	0.446378	1902.84	11.804	1920.41	13.8381	1940.2	25.6906	1940.2	25.6906	98.0744
AOS7 1180	581.868	14304.3	1.97724	8.41792	1.13016	4.66112	2.00865	0.28229	1.63181	0.81239	1602.88	23.1579	1760.29	16.7943	1953.33	20.9212	1953.33	20.9212	82.059
AOS7 776	55.2635	4241.54	0.533308	8.14617	6.68728	5.64219	6.91681	0.340407	1.22036	0.176434	1888.63	19.9788	1922.57	59.7273	1960.13	121.653	1960.13	121.653	96.3521
AOS7 195	428.62	44362.9	1.05329	8.66368	0.987258	5.75026	1.25455	0.345288	0.767194	0.611531	1912.06	12.6938	1938.96	10.8518	1968.57	17.6979	1968.57	17.6979	97.1292
AOS7 589	901.092	11587.2	4.01689	8.37739	0.675441	5.64401	1.15468	0.338159	0.800706	0.693441	1877.81	13.0438	1922.85	9.96012	1972.52	14.8262	1972.52	14.8262	95.1985
AOS7 424	279.854	18542.8	2.53478	8.46247	1.30283	6.62356	1.81919	0.393705	1.26107	0.693202	2139.99	22.9646	2062.49	16.0501	1986.68	23.3292	1986.68	23.3292	107.717
AOS7 869	287.899	15960.2	0.757707	8.18494	1.05575	5.69654	1.46678	0.338031	0.999915	0.681709	1877.19	16.2844	1930.84	12.67	1989.69	19.0864	1989.69	19.0864	94.3457
AOS7 172	204.195	16367.1	0.641925	8.17868	1.3719	5.22393	3.11933	0.307291	2.77939	0.891019	1727.36	42.1163	1856.53	26.5903	2005.2	25.1419	2005.2	25.1419	86.1439
AOS7 1129	275.022	30498.4	1.90042	8.06151	0.737122	6.31843	1.0618	0.3676	0.759058	0.714876	2018.1	13.1525	2021.01	9.30846	2024.75	13.151	2024.75	13.151	99.6713
AOS7 606	274.177	27124.5	2.00463	8.1648	1.159	6.17122	1.39102	0.357811	0.705779	0.507381	1971.79	11.9895	2000.38	12.1552	2030.8	21.2187	2030.8	21.2187	97.0941
AOS7 1159	460.963	18141.3	1.01286	7.90983	1.36485	6.17641	1.83521	0.355324	1.21862	0.664019	1959.97	20.5953	2001.12	16.0391	2044.62	24.2528	2044.62	24.2528	95.86
AOS7 334	653.338	37081	2.03767	7.98602	1.02416	6.29292	1.34381	0.361419	0.86338	0.642489	1988.89	14.7754	2017.47	11.7743	2047.59	18.1929	2047.59	18.1929	97.1333
AOS7 634	546.261	33100.6	5.2366	7.96562	0.919676	5.28027	1.1566	0.302831	0.683216	0.59071	1705.33	10.2374	1865.68	9.87428	2050.09	16.4829	2050.09	16.4829	83.1835
AOS7 237	451.07	6110.05	2.09364	7.82635	0.720998	6.39142	1.1852	0.36238	0.834206	0.703855	1993.45	14.304	2031.09	10.4065	2070.31	14.835	2070.31	14.835	96.2872
AOS7 343	241.102	27186.3	1.32955	7.96717	1.09452	6.48491	1.34418	0.366575	0.728393	0.541887	2013.26	12.5954	2043.85	11.8256	2075.61	19.8957	2075.61	19.8957	96.9961
AOS7 479	369.546	26533.8	1.64718	7.83631	1.116	6.50379	1.41995	0.367344	0.799811	0.563266	2016.89	13.8516	2046.41	12.4972	2077.04	20.6596	2077.04	20.6596	97.104
AOS7 1141	277.974	21873.4	1.0481	7.7622	1.16554	6.88613	1.50751	0.387706	0.841066	0.557916	2112.18	15.148	2096.87	13.3668	2082.63	22.016	2082.63	22.016	101.419
AOS7 369	263.974	45737.4	2.63222	7.63636	1.10198	6.94858	1.24533	0.386636	0.567626	0.455805	2107.21	10.2028	2104.88	11.0544	2103.36	19.4599	2103.36	19.4599	100.183
AOS7 1075	434.446	35103	0.769888	7.64223	0.754418	7.0323	0.963525	0.387571	0.576308	0.598124	2111.55	10.3769	2115.52	8.56565	2120.12	13.53	2120.12	13.53	99.5957
AOS7 214	217.31	20362.3	3.19314	7.6226	1.37175	7.0533	1.54312	0.388284	0.693319	0.449296	2114.86	12.5004	2118.17	13.7238	2122.13	24.1529	2122.13	24.1529	99.6575
AOS7 978	433.983	23156.9	3.18632	7.50477	0.981246	7.02405	1.18527	0.38151	0.65415	0.551899	2083.34	11.6452	2114.48	10.5355	2145.65	17.2704	2145.65	17.2704	97.0957
AOS7 612	626.265	105597	1.38671	7.57108	0.796539	7.39983	1.20103	0.397866	0.898404	0.748027	2159.2	16.484	2160.95	10.7436	2163.35	13.902	2163.35	13.902	99.8083
AOS7 412	172.13	16941.7	2.0355	7.19311	2.07159	8.05935	2.22453	0.41221	0.77243	0.347233	2225.02	14.5344	2237.7	20.0968	2250.06	36.0403	2250.06	36.0403	98.8872
AOS7 662	1344.35	88586.5	33.2361	6.94938	0.728035	8.15163	1.21675	0.409079	0.973778	0.800308	2210.71	18.2243	2247.99	11.0051	2282.84	12.5602	2282.84	12.5602	96.8404
AOS7 222	148.406	9605.13	1.0176	6.85145	0.833928	8.92521	1.43453	0.44216	1.13365	0.790262	2360.3	22.4061	2330.38	13.0991	2305.01	15.0958	2305.01	15.0958	102.399
AOS7 914	513.068	25434.2	0.880599	6.75376	0.859273	8.50678	1.0245	0.418138	0.554643	0.541381	2252.02	10.5422	2286.65	9.30859	2318.48	14.774	2318.48	14.774	97.1337
AOS7 569	185.47	12129.1	1.55734	6.3477	0.852512	9.61868	1.20123	0.450134	0.59556	0.495794	2395.85	11.9173	2398.96	11.0488	2402.33	17.7373	2402.33	17.7373	99.7304
AOS7 1199	262.938	24031.1	2.03641	6.05726	0.82068	10.3239	1.04535	0.458976	0.620426	0.593511	2435.04	12.582	2464.25	9.67726	2489.16	14.1795	2489.16	14.1795	97.8256
AOS7 946	426.231	59982	1.65562	6.13267	0.791822	10.6254	1.27033	0.470987	0.985451	0.775745	2487.89	20.3402	2490.93	11.7897	2494.13	13.5038	2494.13	13.5038	99.7496
AOS7 917	60.3502	4033.75	3.46365	5.87722	5.07012	11.4418	5.21883	0.496667	0.967742	0.185433	2599.46	20.7024	2559.84	48.7695	2529.33	86.1362	2529.33	86.1362	102.773
AOS7 743	276.49	41086.6	1.15615	5.81267	0.557148	10.8104	1.02284	0.454107	0.850966	0.831963	2413.48	17.1314	2506.96	9.50666	2584.28	9.47521	2584.28	9.47521	93.3911
AOS7 574	163.679	14130.1	1.10458	5.67789	0.927147	12.0281	1.1509	0.502816	0.635298	0.551998	2625.89	13.7025	2606.6	10.7895	2592.36	16.0078	2592.36	16.0078	101.293
AOS7 63	385.51	14464.4	3.49366	5.79309	1.06143	10.2394	1.57989	0.425623	1.16684	0.738556	2285.95	22.4569	2456.64	14.6156	2601.8	17.7515	2601.8	17.7515	87.8605
AOS7 403	619.061	76938.7	5.83978	5.78985	0.641788	11.6845	0.87335	0.481301	0.59026	0.675858	2532.93	12.3633	2579.46	8.16892	2616.94	10.7136	2616.94	10.7136	96.7899
AOS7 96	75.1573	6576.11	1.43469	5.56496	1.70209	13.1515	3.00758	0.537871	2.38361	0.792534	2774.53	53.7429	2690.59	28.3879	2628.83	30.4915	2628.83	30.4915	105.542
AOS7 7	1100.57	147913	3.82118	5.78546	0.519261	12.3293	0.871576	0.503976	0.699822	0.802939	2630.86	15.1173	2629.81	8.18607	2629.71	8.63603	2629.71	8.63603	100.044
AOS7 828	109.208	5347.4	2.59128	5.55875	2.37912	12.755	2.60826	0.520409	0.925055	0.354664	2700.91	20.4113	2661.72	24.5632	2632.79	40.5283	2632.79	40.5283	102.587
AOS7 152	51.8663	4417.74	0.757544	5.67473	2.03561	12.0832	2.28918	0.492596	0.700136	0.305846	2581.9	14.8953	2610.89	21.4705	2634.16	36.2169	2634.16	36.2169	98.0158
AOS7 660	153.434	17238	0.999605	5.60744	0.865273	12.888	1.1662	0.52379	0.756562	0.648743	2715.23	16.7647	2671.5	10.9892	2639.27	14.7367	2639.27	14.7367	102.878
AOS7 796	97.5866	17106.4	1.39251	5.61194	1.05085	12.9978	1.29567	0.521738	0.743249	0.573639	2706.55	16.4273	2679.5	12.2168	2659.86	17.5925	2659.86	17.5925	101.755
AOS7 1000	149.767	48438.4	1.32067	5.61566	0.99611	12.801	1.39893	0.513071	0.975344	0.697209	2669.73	21.3204	2665.12	13.176	2662.33	16.6196	2662.33	16.6196	100.278
AOS7 719	736.816	50275.5	8.70903	5.45935	0.666365	11.8121	1.13104	0.472003	0.911019	0.805473	2492.34	18.8314	2589.62	10.5884	2667.34	11.1028	2667.34	11.1028	93.4391
AOS7 691	508.684	27438.4	3.70974	5.43813	0.769204	11.0413	1.21	0.439838	0.927667	0.76667	2349.91	18.268	2526.62	11.2662	2672.48	12.8619	2672.48	12.8619	87.93
AOS7 952	83.7509	9146.01	0.513366	5.45106	1.2902	13.0716	1.6295	0.520128	0.964492	0.591894	2699.72	21.274	2684.84	15.371	2674.35	21.7386	2674.35	21.7386	100.949
AOS7 999	56.8863	5635.58	1.69967	5.52152	1.98052	13.8499	2.35933	0.549423	1.1173	0.473565	2822.77	25.5403	2739.49	22.3467	2679.38	34.3822	2679.38	34.3822	105.352
AOS7 652	32.2667	2731.03	1.12174	5.36219	0.784515	13.711	2.21339	0.538322	1.87839	0.84865	2776.42	42.3746	2729.95	20.9496	2696.46	19.3374	2696.46	19.3374	102.965
AOS7 1097	495.44	69581.6	1.30324	5.39163	1.12123	13.4082	1.42583	0.526199	0.878735	0.616298	2725.42	19.5306	2708.84	13.4736	2697.2	18.5444	2697.2	18.5444	101.046
AOS7 620	151.41	16526.1	0.890542	5.44983	1.0154	14.2973	1.30612	0.560585	0.756695	0.579344	2869.04	17.5224	2769.64	12.3958	2698.69	17.5796	2698.69	17.5796	106.312
AOS7 115	126.51	11204.2	1.65923	5.37268	1.78518	12.0305	2.18012	0.471135	1.1941	0.547723	2488.53	24.6521	2606.78	20.4405	2700.69	30.118	2700.69	30.118	92.1446
AOS7 211	103.664	7222.18	0.587682	5.46212	1.19289	12.8405	2.42617	0.502579	1.93761	0.798627	2624.87	41.7788	2668.02	22.8589	2701.59	24.1061	2701.59	24.1061	97.16
AOS7 759	407.463	44247.2	2.86097	5.45638	0.700406	13.8157	0.908662	0.540559	0.570704	0.62807	2785.79	12.909	2737.15	8.60386	2702.17	11.6742	2702.17	11.6742	103.094
AOS7 107	117.932	10929.8	1.54323	5.34576	1.3107	13.8574	1.53442	0.541046	0.752817	0.490621	2787.82	17.0383	2740.01	14.5326	2705.67	22.0653	2705.67	22.0653	103.036
AOS7 455	137.226	17108.7	1.71029	5.33722	1.92758	13.1669	2.05089	0.513558	0.69092	0.336887	2671.8	15.1125	2691.69	19.3568	2707.36	31.8619	2707.36	31.8619	98.6864
AOS7 324	167.815	28230.2	1.36508	5.42523	0.901022	13.4937	1.22061	0.525969	0.822821	0.674108	2724.44	18.2826	2714.84	11.5392	2708.41	14.8768	2708.41	14.8768	100.592
AOS7 829	275.857	30656.3	2.20565	5.35339	0.947851	13.4675	1.29798	0.522968	0.886247	0.682787	2711.76	19.6182	2713.01	12.2691	2714.65	15.639	2714.65	15.639	99.8936
AOS7 352	67.0811	4856.83	1.02238	5.36777	1.67293	13.5397	1.94383	0.525106	0.903415	0.464761	2720.8	20.0518	2718.06	18.3818	2716.74	28.3764	2716.74	28.3764	100.15
AOS7 1104	67.4922	6146.31	1.03916	5.3056	1.63765	13.4559	2.06406	0.520036	1.25145	0.606306	2699.33	27.6003	2712.19	19.5107	2722.49	27.047	2722.49	27.047	99.1493
AOS7 492	259.886	31902.5	1.09045	5.38371	0.842672	13.6544	1.18475	0.527386	0.82539	0.696679	2730.43	18.3721	2726.04	11.2093	2723.49	14.001	2723.49	14.001	100.255
AOS7 735	158.639	9502.03	1.08776	5.24682	1.07001	14.5453	1.34667	0.560105	0.771531	0.572915	2867.06	17.8562	2785.96	12.795	2728.46	18.1756	2728.46	18.1756	105.08
AOS7 780	118.81	7739.91	1.07661	5.28452	2.09368	11.7082	2.49455	0.450213	1.30271	0.522222	2396.2	26.0708	2581.35	23.3402	2730.81	35.0305	2730.81	35.0305	87.747
AOS7 737	413.839	27014.9	1.07782	5.25281	0.621195	12.7701	1.10523	0.490249	0.907071	0.820706	2571.76	19.2362	2662.84	10.4077	2733.49	10.392	2733.49	10.392	94.0833
AOS7 658	145.452	11303.7	1.27905	5.27291	1.25491	14.0338	1.46557	0.537204	0.740535	0.505287	2771.73	16.6829	2751.99	13.8922	2738.25	20.8081	2738.25	20.8081	101.223
AOS7 1107	537.707	50238.5	2.51193	5.31847	0.679519	13.3993	1.01177	0.512476	0.744935	0.736267	2667.19	16.2713	2708.21	9.56019	2739.65	11.2612	2739.65	11.2612	97.3551
AOS7 160	231.394	15876.7	2.64483	5.36222	1.11435	14.4009	1.46004	0.549829	0.929182	0.636407	2824.46	21.2503	2776.49	13.8633	2742.51	18.5215	2742.51	18.5215	102.988
AOS7 173	126.527	9568.54	1.44636	5.31643	0.921354	13.7704	1.1987	0.524508	0.598225	0.49906	2718.27	13.268	2734.04	11.3479	2746.42	17.0768	2746.42	17.0768	98.9751
AOS7 108	189.307	21411.1	2.20309	5.28472	0.797149	12.7539	1.96518	0.485209	1.79363	0.912705	2549.92	37.7743	2661.64	18.5053	2748.38	13.1979	2748.38	13.1979	92.7787
AOS7 988	68.6954	8529.51	0.903053	5.38629	2.18815	13.7644	2.5164	0.523152	1.02228	0.406246	2712.53	22.6346	2733.64	23.8249	2749.97	37.7935	2749.97	37.7935	98.6388
AOS7 1088	678.272	50998.8	1.29806	5.21155	0.918401	12.4941	1.39659	0.474852	1.05032	0.752065	2504.81	21.7998	2642.28	13.1306	2750.02	15.1268	2750.02	15.1268	91.0831
AOS7 1163	406.361	48487.7	13.1693	5.24451	0.982044	13.9311	1.75487	0.52802	1.45101	0.826844	2733.1	32.3231	2745.03	16.6268	2754.52	16.2169	2754.52	16.2169	99.2226
AOS7 134	86.4318	7544.14	1.45512	5.2333	1.06099	14.1014	1.30816	0.533376	0.759333	0.580461	2755.66	17.0269	2756.55	12.4038	2757.9	17.4967	2757.9	17.4967	99.9187
AOS7 1127	313.031	75425.1	2.37009	5.26447	0.520351	13.5672	0.940925	0.511528	0.782823	0.831971	2663.15	17.078	2719.98	8.89837	2763.17	8.57039	2763.17	8.57039	96.3803
AOS7 201	133.907	13158.7	1.37204	5.32457	0.72158	14.8074	1.20838	0.555656	0.846102	0.700192	2848.66	19.4821	2802.94	11.494	2770.92	14.15	2770.92	14.15	102.805
AOS7 879	177.861	15717.6	1.27104	5.23178	1.13464	14.0959	1.40759	0.524594	0.820508	0.582916	2718.63	18.2	2756.18	13.3465	2784.49	18.737	2784.49	18.737	97.635
AOS7 536	1277.74	111494	4.92728	5.22201	0.544874	13.2776	0.835478	0.494038	0.632719	0.757314	2588.12	13.4874	2699.59	7.88929	2784.83	8.93615	2784.83	8.93615	92.9364
AOS7 1055	55.8899	5728.15	1.22819	5.13241	2.78874	14.0607	2.98845	0.523089	0.980187	0.327991	2712.27	21.701	2753.81	28.3368	2785.1	46.2613	2785.1	46.2613	97.3851
AOS7 459	219.378	11102.2	2.11845	5.06824	1.02377	14.1483	1.50559	0.521872	1.07943	0.71695	2707.11	23.8617	2759.7	14.2793	2799.09	17.1719	2799.09	17.1719	96.7142
AOS7 669	246.219	28646	1.70803	4.9763	0.746854	14.8906	1.13401	0.547777	0.847899	0.747697	2815.92	19.3446	2808.27	10.7904	2803.48	12.3175	2803.48	12.3175	100.444
AOS7 1011	483.213	138411	4.04633	5.04256	0.788306	13.0024	1.15046	0.473082	0.837109	0.727631	2497.06	17.3305	2679.83	10.8477	2821.46	12.8838	2821.46	12.8838	88.5024
AOS7 448	393.762	30243.7	4.25122	4.96522	0.587896	13.7744	1.46088	0.499108	1.32725	0.908529	2609.96	28.4862	2734.32	13.8303	2828.2	9.95809	2828.2	9.95809	92.2835
AOS7 34	90.7243	10537.3	2.37434	5.0697	1.45459	14.9771	1.66691	0.53938	0.803006	0.481732	2780.85	18.1379	2813.78	15.8675	2838.16	23.8165	2838.16	23.8165	97.9808
AOS7 603	441.881	57145.2	1.45935	4.95185	0.65746	15.9967	0.964922	0.560826	0.70475	0.73037	2870.04	16.324	2876.6	9.22146	2881.89	10.7017	2881.89	10.7017	99.5888
AOS7 544	123.975	9779.67	2.13254	4.92	0.760858	16.0144	1.54081	0.559787	1.26061	0.818149	2865.75	29.1649	2877.66	14.7267	2886.7	14.3811	2886.7	14.3811	99.2743
AOS7 571	125.075	10633.5	1.20397	4.67035	0.655269	17.0721	1.10004	0.586875	0.806511	0.733164	2976.74	19.2279	2938.89	10.5519	2913.78	12.1169	2913.78	12.1169	102.161
AOS7 429	183.119	21634.3	6.0196	4.66001	0.632583	17.5141	0.920905	0.576842	0.660747	0.717498	2935.85	15.582	2963.43	8.84587	2982.89	10.324	2982.89	10.324	98.423
AOS7 1028	239.204	38977.5	1.50926	3.93254	0.945945	22.8047	1.28665	0.650114	0.868917	0.675332	3228.65	22.0685	3218.65	12.5163	3213.1	14.9871	3213.1	14.9871	100.484
AOS-17 UPGRD
							Isotope ratios						Apparent ages (Ma)
Analysis	U	206Pb	U/Th	206Pb*	±	207Pb*	±	206Pb*	±	error	206Pb*	±	207Pb*	±	206Pb*	±	Best age	±	Conc
	(ppm)	204Pb		207Pb*	(%)	235U*	(%)	238U	(%)	corr.	238U*	(Ma)	235U	(Ma)	207Pb*	(Ma)	(Ma)	(Ma)	(%)
AOS17 11	661.08	3219.95	2.41696	18.6806	0.516479	0.128039	1.79029	0.0187389	0.964149	0.538542	119.681	1.14326	122.334	2.06335	175.221	35.205	119.681	1.14326	68.3028			Rejected Analyses
AOS17 839	390.583	4366.76	1.62792	15.2393	10.6532	0.16331	11.5405	0.0190366	0.976009	0.0845725	121.565	1.17536	153.596	16.4517	682.544	246.322	121.565	1.17536	17.8105			206Pb/238U age	± (Ma)	206Pb/207Pb age	± (Ma)
AOS17 1028	494.944	4211.96	0.621806	18.1661	8.57179	0.13599	8.85128	0.0191631	0.926544	0.104679	122.364	1.12307	129.466	10.7593	262.853	202.451	122.364	1.12307	46.5524			234.393	4.4146	2008.42	353.882
AOS17 391	767.229	3357.06	1.70026	16.8352	9.17617	0.147449	10.0285	0.0194439	1.23849	0.123498	124.14	1.52276	139.657	13.0857	413.147	222.972	124.14	1.52276	30.0475			283.309	1.42308	436.259	29.6202
AOS17 585	998.599	7305.31	1.04172	18.0218	5.37037	0.192214	5.59661	0.025806	0.940422	0.168034	164.246	1.5251	178.517	9.16216	372.882	124.289	164.246	1.5251	44.0478			287.781	7.86213	1224.3	277.186
AOS17 1066	558.271	7985.32	6.17974	18.4359	2.20533	0.189116	2.84389	0.0258243	1.04231	0.366508	164.361	1.69149	175.875	4.5925	334.624	59.9835	164.361	1.69149	49.1181			309.286	2.4272	551.358	277.795
AOS17 55	1115.77	6222.56	0.797369	18.0879	6.34987	0.193885	6.53669	0.0264466	0.953686	0.145897	168.27	1.584	179.939	10.7792	337.097	146.635	168.27	1.584	49.9174			330.954	NA	NA	NA
AOS17 772	1484.39	15327	1.59821	19.6233	2.52344	0.202102	2.82192	0.0295522	0.761881	0.269986	187.745	1.40976	186.903	4.81734	177.269	63.378	187.745	1.40976	105.91			345.465	2.62339	411.879	71.2636
AOS17 105	789.064	12176.7	1.42023	18.2685	4.84689	0.225949	5.01822	0.0304668	1.05881	0.210992	193.469	2.01803	206.849	9.39138	363.12	110.672	193.469	2.01803	53.2797			362.779	3.70454	816.806	118.676
AOS17 793	398.948	3855.54	0.623296	17.3528	6.36956	0.275181	8.44107	0.0370092	1.47623	0.174887	234.268	3.39626	246.827	18.4979	368.967	187.524	234.268	3.39626	63.4929			367.08	2.48088	463.674	99.7399
AOS17 969	1009.49	14526.6	1.23606	18.7238	2.40061	0.280078	2.59027	0.0395124	0.890577	0.343816	249.81	2.18219	250.719	5.75469	260.26	55.8561	249.81	2.18219	95.9848			367.301	2.42628	482.276	461.364
AOS17 682	1130.58	12506.9	1.40534	18.9966	2.99374	0.280634	3.3209	0.0396502	0.476274	0.143417	250.664	1.17093	251.161	7.3894	256.804	75.5713	250.664	1.17093	97.609			391.4	3.13386	474.789	114.205
AOS17 671	1273.24	8027.05	1.19924	19.0193	1.32292	0.304676	2.68651	0.0437236	0.941271	0.350369	275.873	2.54193	270.046	6.3703	220.843	58.2415	275.873	2.54193	124.918			395.034	3.5931	533.838	96.1602
AOS17 575	1588.14	8508.85	0.800587	17.5936	1.28284	0.339256	2.98341	0.0444744	1.72469	0.578093	280.508	4.73415	296.608	7.67389	426.304	54.3018	280.508	4.73415	65.7999			403.597	2.65345	432.618	NA
AOS17 293	421.346	2623.29	3.28739	16.1843	3.99052	0.368223	6.11604	0.0475331	0.872359	0.142635	299.358	2.55177	318.336	16.7145	460.597	134.336	299.358	2.55177	64.9935			413.477	3.89134	559.952	480.593
AOS17 1071	1201.43	3882.63	8.72907	18.6109	1.95244	0.331875	2.59613	0.0475719	0.576378	0.222015	299.597	1.6873	290.996	6.5686	223.487	58.5627	299.597	1.6873	134.056			416.784	3.41324	408.491	63.2831
AOS17 546	415.67	5085.24	0.735304	18.1655	5.13831	0.36169	5.80118	0.0495058	1.11583	0.192346	311.487	3.39303	313.476	15.6473	329.273	129.238	311.487	3.39303	94.5983			419.747	2.80961	455.655	294.679
AOS17 360	1105.08	19563.7	1.32841	18.5538	3.08638	0.367646	3.20232	0.0500126	0.771327	0.240865	314.599	2.36833	317.908	8.74102	343.188	70.3544	314.599	2.36833	91.6697			425.999	3.25129	365.223	68.9337
AOS17 1069	879.523	2846.12	2.58873	18.6832	2.1788	0.34398	3.61699	0.0509329	0.746139	0.206287	320.247	2.3311	300.183	9.40004	147.992	82.9878	320.247	2.3311	216.394			426.015	2.21995	591.379	NA
AOS17 608	209.889	2478.91	1.69078	13.1044	19.0903	0.512226	19.2985	0.0526696	1.1313	0.058621	330.891	3.64892	419.945	66.469	944.855	398.074	330.891	3.64892	35.0203			449.336	5.98092	1125.95	NA
AOS17 553	294.98	3925.29	3.09692	17.5551	6.25642	0.390026	6.65378	0.0530394	0.81803	0.122942	333.155	2.65609	334.388	18.9592	343.958	149.563	333.155	2.65609	96.8593			450.976	17.1095	1218.39	1489.6
AOS17 201	409.05	6792.85	1.11943	17.2615	6.60376	0.416541	7.57436	0.0537711	0.714509	0.0943327	337.633	2.35033	353.575	22.6191	460.563	167.394	337.633	2.35033	73.3087			478.52	3.38	839.138	753.709
AOS17 622	1128.21	5089.7	4.71787	16.5697	1.38267	0.429531	2.32307	0.0543265	0.793725	0.341671	341.03	2.63648	362.844	7.08761	505.733	48.0275	341.03	2.63648	67.4327			482.301	3.68248	604.165	51.4385
AOS17 275	867.337	8759.49	5.86361	17.8734	2.64583	0.413475	3.34693	0.0550698	0.846096	0.252798	345.572	2.84689	351.375	9.94149	390.854	72.6917	345.572	2.84689	88.4146			486.751	3.73067	353.497	137.21
AOS17 729	264.207	2998.89	3.04755	17.7145	8.54022	0.399565	8.82234	0.0559287	1.21175	0.13735	350.818	4.13744	341.332	25.5799	278.25	200.433	350.818	4.13744	126.08			497.366	3.02403	1392.79	241.77
AOS17 1011	394.099	5104.29	3.34925	18.8446	3.81913	0.391327	4.17656	0.0562614	1.2778	0.305944	352.849	4.38752	335.338	11.9283	216.613	92.0994	352.849	4.38752	162.894			504.688	3.89512	555.762	43.8931
AOS17 950	874.628	3790.26	1.00422	15.6015	6.53836	0.467344	7.96514	0.0564172	1.23494	0.155043	353.8	4.25149	389.353	25.7645	607.349	170.396	353.8	4.25149	58.2531			515.77	3.22247	704.959	612.048
AOS17 372	892.441	7189.51	1.6539	17.5889	5.36824	0.425141	6.26427	0.0564557	0.82592	0.131846	354.034	2.8452	359.72	18.9769	397.513	139.311	354.034	2.8452	89.0624			522.333	15.8776	1229.31	662.029
AOS17 875	931.643	3483.04	2.06081	16.9644	2.34423	0.430113	2.68867	0.0568808	0.784343	0.291721	356.628	2.72122	363.257	8.21088	406.754	57.5694	356.628	2.72122	87.6764			522.996	3.34905	846.976	482.676
AOS17 93	752.658	4328.77	1.52837	16.1568	2.6878	0.461378	4.64218	0.0572019	0.921789	0.198568	358.587	3.21516	385.216	14.8825	549.428	99.4077	358.587	3.21516	65.2654			554.08	5.53687	999.043	42.0783
AOS17 814	1117.56	12541.1	1.42824	18.1801	1.56277	0.430999	2.35834	0.0576459	0.578304	0.245217	361.293	2.0319	363.885	7.21241	381.398	51.4017	361.293	2.0319	94.7285			603.781	4.33479	986.447	517.865
AOS17 893	812.729	18622.7	14.9733	18.1446	2.31936	0.432457	2.52004	0.0577821	0.862704	0.342337	362.123	3.03793	364.92	7.72517	383.689	53.1893	362.123	3.03793	94.3793			605.414	5.08378	481.444	149.003
AOS17 685	595.166	12648.9	1.64857	18.136	3.69596	0.434953	4.01449	0.0586044	1.24152	0.30926	367.132	4.43066	366.687	12.3562	364.833	86.0752	367.132	4.43066	100.63			608.137	3.98991	781.4	16.6197
AOS17 172	824.827	15882.8	2.28832	18.3632	3.21698	0.441818	3.68697	0.0593647	1.11336	0.301971	371.761	4.02194	371.533	11.4723	371.076	79.1641	371.761	4.02194	100.184			610.866	3.52114	515.562	60.2407
AOS17 659	542.189	4479.05	2.27882	17.4972	3.04355	0.442032	5.01174	0.0597724	0.611355	0.121984	374.241	2.2228	371.684	15.6003	356.731	112.368	374.241	2.2228	104.909			613.593	4.92731	541.462	96.2246
AOS17 1056	493.532	19759.4	2.75839	18.7055	1.89802	0.439704	2.16807	0.0600584	0.848526	0.391374	375.981	3.09904	370.044	6.72352	334.022	45.2089	375.981	3.09904	112.562			613.67	3.18468	682.691	157.028
AOS17 1106	426.199	7904.85	2.36513	18.0224	5.53432	0.450902	5.84626	0.0600708	1.46333	0.250303	376.056	5.34552	377.911	18.4501	390.247	127.118	376.056	5.34552	96.3635			613.734	4.8846	553.219	36.4753
AOS17 96	1288.91	7085.71	8.55014	17.1109	2.02249	0.470099	2.27454	0.0604822	0.740368	0.325502	378.557	2.72201	391.257	7.38541	467.998	47.627	378.557	2.72201	80.8886			614.2	9.17174	162.176	105.64
AOS17 79	317.496	8201.99	2.57257	17.6416	5.44783	0.460464	6.289	0.0607474	0.941517	0.149708	380.169	3.47586	384.581	20.136	412.168	139.159	380.169	3.47586	92.2364			614.86	6.53314	491.076	119.986
AOS17 728	632.184	13519.7	1.99797	18.2832	3.35075	0.452719	3.49164	0.060984	0.695884	0.1993	381.607	2.57847	379.181	11.049	365.355	77.1311	381.607	2.57847	104.448			617.572	3.22097	380.945	155.635
AOS17 742	1763.98	14977.1	1.08001	17.8268	2.12772	0.465403	2.6819	0.0610917	0.747727	0.278806	382.261	2.77518	388.009	8.64877	423.376	57.4815	382.261	2.77518	90.2887			619.76	3.53726	513.251	91.0399
AOS17 610	714.138	6536.56	2.66949	17.6258	2.91501	0.460735	4.06432	0.0613149	0.983815	0.242062	383.617	3.66399	384.769	13.0173	392.657	88.5079	383.617	3.66399	97.6978			620.787	19.9064	810.708	85.3247
AOS17 504	711.761	10331.3	29.1623	17.9187	3.29507	0.459375	3.5137	0.0613536	0.739413	0.210437	383.852	2.75541	383.823	11.2309	384.601	77.2148	383.852	2.75541	99.8053			623.758	4.18329	426.724	185.846
AOS17 889	326.424	7431.05	1.14776	17.9913	3.03712	0.454586	3.2791	0.0615456	0.717055	0.218674	385.018	2.67996	380.486	10.4058	353.99	72.2716	385.018	2.67996	108.765			624.905	20.9746	1122.91	115.143
AOS17 1081	395.327	1522.83	2.81452	17.6681	2.55638	0.408219	4.10404	0.0618953	0.638941	0.155686	387.142	2.40079	347.592	12.0805	92.077	NA	387.142	2.40079	420.454			625.859	6.40415	500.333	183.183
AOS17 121	1905.82	12685.8	8.7373	17.6772	1.13287	0.478421	1.50759	0.0621899	0.630427	0.418169	388.93	2.37942	396.989	4.95368	445.133	30.4663	388.93	2.37942	87.374			625.883	3.99099	737.293	37.807
AOS17 455	194.107	2916.58	1.42509	15.3643	7.32623	0.519018	7.69891	0.0628884	1.08148	0.140472	393.168	4.12495	424.495	26.7164	599.35	165.271	393.168	4.12495	65.599			628.105	15.3492	800.645	35.9021
AOS17 1063	1433.62	31065.2	21.5206	18.55	1.36232	0.477824	1.62742	0.0639884	0.868044	0.533387	399.835	3.3653	396.579	5.34291	378.595	30.9617	399.835	3.3653	105.61			628.239	6.88353	416.364	NA
AOS17 1130	762.236	12011.6	0.85855	18.0929	2.56014	0.484736	2.83911	0.0640913	0.903356	0.318183	400.459	3.5075	401.317	9.41197	407.215	60.2525	400.459	3.5075	98.341			631.315	4.86804	147.88	107.619
AOS17 343	707.441	14178.9	3.35492	18.752	2.71427	0.464067	3.13831	0.0642742	0.667126	0.212575	401.567	2.59722	387.082	10.1009	302.372	69.9004	401.567	2.59722	132.806			631.612	4.21652	523.66	88.6307
AOS17 853	912.16	11794.6	2.4107	17.6579	1.51835	0.493887	2.74256	0.0647818	1.11407	0.406216	404.641	4.36943	407.556	9.2068	425.056	55.9146	404.641	4.36943	95.197			632.865	11.9496	868.357	255.875
AOS17 1054	976.276	22623.4	25.079	18.4806	1.66636	0.482817	1.85948	0.0650283	0.689855	0.370993	406.133	2.71529	400.004	6.14784	365.707	38.9176	406.133	2.71529	111.054			640.602	13.9551	753.313	241.271
AOS17 556	811.11	15955.1	4.39371	18.2046	1.52708	0.488532	2.03296	0.0654794	0.756242	0.37199	408.863	2.99598	403.91	6.77487	376.639	42.4373	408.863	2.99598	108.556			643.441	7.20891	422.126	118.198
AOS17 1173	135.008	3444.92	1.90588	17.0564	10.2883	0.489607	11.1753	0.065612	1.08692	0.0972609	409.665	4.3142	404.643	37.3131	377.034	250.896	409.665	4.3142	108.655			647.86	6.09306	431.497	205.929
AOS17 937	892.02	13444.3	2.17998	16.8098	1.59107	0.527937	3.31827	0.0657404	2.85849	0.86144	410.442	11.3667	430.439	11.6423	539.911	36.8696	410.442	11.3667	76.0202			647.882	6.74842	715.204	476.972
AOS17 33	188.036	4504.67	1.94305	17.754	6.89289	0.488103	7.23705	0.0658863	0.723348	0.0999508	411.324	2.88237	403.617	24.1074	360.702	162.656	411.324	2.88237	114.034			649.67	6.77539	434.532	135.356
AOS17 1125	288.088	4999.87	3.35841	17.8837	1.54003	0.489105	4.79417	0.0658966	0.981957	0.204823	411.387	3.91344	404.3	15.9903	364.971	105.831	411.387	3.91344	112.718			650.654	7.88705	494.864	126.73
AOS17 885	870.612	27146.6	1.41506	18.239	1.09562	0.497867	1.43199	0.0661335	0.776218	0.542054	412.819	3.10393	410.258	4.83297	396.823	26.9786	412.819	3.10393	104.031			665.677	6.30472	755.104	334.192
AOS17 1050	293.542	5660.91	2.04133	16.4511	4.8479	0.533878	5.54201	0.0663433	1.39224	0.251216	414.088	5.58384	434.38	19.5886	544.418	117.312	414.088	5.58384	76.0607			671.965	12.136	652.562	309.455
AOS17 257	143.947	2978.48	1.56016	15.7913	11.5184	0.532197	11.8153	0.0664043	1.67759	0.141984	414.456	6.73407	433.266	41.6942	535.483	256.771	414.456	6.73407	77.3987			694.717	7.24664	185.725	NA
AOS17 760	315.572	16926.3	2.70088	17.6017	5.47147	0.512177	5.7676	0.0664547	1.11829	0.193891	414.761	4.49217	419.912	19.838	449.25	125.804	414.761	4.49217	92.323			707.813	5.67955	744.805	22.2166
AOS17 723	624.253	11088.4	2.33415	18.1934	2.57655	0.495309	2.87615	0.0665994	0.711376	0.247336	415.635	2.86343	408.522	9.67387	369.47	62.777	415.635	2.86343	112.495			725.851	6.37555	1195.97	NA
AOS17 866	323.256	22524.5	2.22901	18.5637	1.90382	0.4891	2.42036	0.0666696	0.973786	0.402332	416.06	3.92356	404.297	8.0722	338.597	50.1845	416.06	3.92356	122.878			727.557	11.6408	1267.74	186.804
AOS17 862	679.26	17474.7	2.91154	18.0806	2.17053	0.500509	2.37199	0.0667198	0.763975	0.322082	416.363	3.08036	412.047	8.03387	388.896	50.4187	416.363	3.08036	107.063			730.537	5.17714	629.927	60.4604
AOS17 929	332.324	6366.85	0.815175	17.7651	4.53256	0.494329	4.71391	0.066827	0.637353	0.135207	417.011	2.57369	407.856	15.8349	357.312	105.472	417.011	2.57369	116.708			738.569	5.08025	978.246	56.8097
AOS17 913	734.678	4472.3	1.16007	16.7148	3.09216	0.518863	5.28206	0.0668994	0.714213	0.135215	417.449	2.88699	424.392	18.3238	463.269	116.045	417.449	2.88699	90.1094			746.931	7.61776	1052.81	108.815
AOS17 364	63.1724	1489.4	2.17707	13.7758	13.2494	0.581066	16.8031	0.0669228	1.74633	0.103929	417.59	7.06131	465.146	62.7839	708.225	357.716	417.59	7.06131	58.9629			753.308	8.63749	1052.67	20.1311
AOS17 386	1375.59	14341.1	3.5938	17.5839	2.08331	0.51516	2.30553	0.0669987	0.933536	0.404912	418.049	3.77878	421.913	7.95964	444.037	46.8771	418.049	3.77878	94.1472			762.319	5.65996	972.22	66.2893
AOS17 216	386.452	9052.13	1.99941	17.1578	1.77445	0.522742	2.48383	0.0670028	0.872724	0.351363	418.073	3.53283	426.981	8.6581	476.327	51.4446	418.073	3.53283	87.7703			771.78	7.04164	650.671	52.268
AOS17 401	447.409	7658.29	8.3607	17.2746	1.99393	0.516882	2.2664	0.0670146	0.771935	0.3406	418.144	3.12534	423.066	7.84179	450.926	47.3278	418.144	3.12534	92.7301			774.008	12.0654	1125.79	63.162
AOS17 1023	589.558	20084	6.50496	17.6812	2.82789	0.51907	2.97901	0.0674294	0.616794	0.207047	420.65	2.51171	424.53	10.3363	446.6	64.7937	420.65	2.51171	94.1895			775.59	12.1647	498.047	238.912
AOS17 130	110.908	1895.85	0.700887	13.9822	10.1584	0.598248	14.1165	0.0674321	1.4226	0.100776	420.666	5.79332	476.121	53.703	753.882	297.845	420.666	5.79332	55.8			783.61	7.17678	739.093	229.649
AOS17 686	391.548	11854.6	2.81557	17.7117	5.86758	0.512089	6.00025	0.0674412	0.730063	0.121672	420.722	2.97345	419.853	20.6361	416.036	133.163	420.722	2.97345	101.126			787.425	7.86275	1012.16	24.9256
AOS17 1044	389.542	7715.03	1.80283	17.3737	2.42706	0.516319	3.16318	0.0675639	0.941516	0.297648	421.462	3.8412	422.689	10.937	430.338	67.3183	421.462	3.8412	97.9374			788.015	13.2799	684.37	133.954
AOS17 718	243.258	6982.19	0.927401	18.1011	6.61003	0.497057	7.13864	0.0675957	1.4569	0.204087	421.654	5.94649	409.709	24.0711	343.935	158.319	421.654	5.94649	122.597			800.572	6.35982	981.752	51.6811
AOS17 601	397.507	7409.7	2.49555	19.1796	1.83627	0.471117	2.2176	0.0676988	0.907513	0.409232	422.277	3.7094	391.96	7.21111	217.752	46.8601	422.277	3.7094	193.926			813.691	5.08924	1082.48	35.3356
AOS17 1055	259.415	1437.46	0.639866	15.1292	6.71169	0.526908	8.52679	0.0677941	0.864132	0.101343	422.852	3.53673	429.755	29.8856	467.903	188.129	422.852	3.53673	90.3718			818.115	22.4711	522.306	280.234
AOS17 85	1043.53	23106	3.16366	18.1126	1.44801	0.509927	1.78108	0.0678084	0.714627	0.401232	422.938	2.92542	418.4	6.1076	394.41	36.5911	422.938	2.92542	107.233			838.505	6.86156	1000.01	37.9082
AOS17 922	588.539	12022	2.61881	18.6383	1.91441	0.486131	2.36112	0.0678285	0.626722	0.265434	423.06	2.56628	402.271	7.84247	285.567	52.035	423.06	2.56628	148.147			841.924	6.20269	1023	54.6449
AOS17 904	793.65	11397.1	1.19358	18.7375	3.11627	0.486037	3.2724	0.067845	0.705914	0.215718	423.159	2.89121	402.206	10.8681	284.56	73.0934	423.159	2.89121	148.707			843.905	10.6234	1005.35	352.338
AOS17 655	688.224	5681.9	1.24991	16.8551	3.01845	0.53149	3.90526	0.0678777	0.603113	0.154436	423.357	2.47128	432.798	13.7622	484.343	85.2345	423.357	2.47128	87.4084			847.053	8.75222	1183.62	186.793
AOS17 31	791.864	17542	1.41052	18.0513	1.05634	0.519502	1.26206	0.0679663	0.613747	0.486307	423.891	2.51793	424.819	4.38124	430.802	24.5847	423.891	2.51793	98.3958			847.427	7.03627	1219.5	259.492
AOS17 612	1060.3	18437.3	0.932754	17.798	0.929844	0.519636	1.2686	0.0680084	0.680201	0.536183	424.146	2.79218	424.908	4.40471	429.995	23.8891	424.146	2.79218	98.6397			855.007	5.17011	615.484	90.0921
AOS17 881	391.687	6123.57	2.12492	18.9039	2.79296	0.474599	3.53294	0.0681728	0.910301	0.257661	425.138	3.74518	394.361	11.5462	218.667	79.0093	425.138	3.74518	194.423			863.707	6.43925	1023.9	88.638
AOS17 329	534.041	9200.16	0.862369	18.3549	3.31422	0.49836	3.92924	0.0681935	0.698899	0.177871	425.263	2.87624	410.592	13.2706	329.883	87.7208	425.263	2.87624	128.913			866.502	6.70168	1408	190.538
AOS17 1103	654.549	18262.7	1.41009	17.7149	1.73375	0.533157	2.27042	0.0684594	0.717456	0.316001	426.867	2.96339	433.903	8.01704	472.363	47.6661	426.867	2.96339	90.3685			877.939	11.7768	1175.42	315.596
AOS17 310	508.107	15545.2	3.42433	17.1716	2.04877	0.548405	2.35452	0.069277	0.874976	0.371616	431.798	3.65437	443.951	8.46757	508.416	48.0813	431.798	3.65437	84.9301			878.532	6.0462	1120.79	16.9435
AOS17 339	491.196	2055.65	2.71185	17.7267	1.65265	0.471665	14.0327	0.0693389	3.01848	0.215104	432.171	12.6174	392.338	45.697	164.778	NA	432.171	12.6174	262.275			880.444	14.4863	1297.39	299.78
AOS17 295	265.335	13597.1	2.28776	17.3107	7.90278	0.543537	7.97034	0.0697845	0.9341	0.117197	434.857	3.92802	440.754	28.5058	472.628	175.384	434.857	3.92802	92.0083			883.542	11.0572	767.569	236.625
AOS17 923	188.337	9513.48	0.965571	18.5839	5.71998	0.501053	6.12619	0.0700599	0.858033	0.14006	436.516	3.62146	412.415	20.7667	280.683	138.93	436.516	3.62146	155.519			884.312	19.5202	1924.69	1430.85
AOS17 1096	191.243	6123.42	0.968626	16.9316	9.23629	0.557338	9.40604	0.0702974	0.721835	0.0767417	437.947	3.05627	449.792	34.1929	511.776	206.511	437.947	3.05627	85.5741			885.63	4.2725	1011.88	159.46
AOS17 442	603.527	4837.31	0.925595	17.7708	3.99673	0.517008	4.11158	0.0703852	0.753873	0.183353	438.476	3.19564	423.151	14.2291	341.462	91.5356	438.476	3.19564	128.412			888.662	7.30861	1240.5	302.512
AOS17 176	347.527	8129.59	2.70175	17.4212	6.00766	0.545894	6.18062	0.0706375	1.00741	0.162995	439.996	4.28468	442.303	22.1646	455.291	135.433	439.996	4.28468	96.6405			892.257	6.6261	1175.78	21.6993
AOS17 1109	604.169	18772.6	1.80382	17.2636	6.67986	0.564449	6.7288	0.0707168	0.628761	0.0934434	440.473	2.67702	454.418	24.6556	526.563	147.007	440.473	2.67702	83.6506			892.751	8.04382	989.551	212.468
AOS17 871	632.215	15007.5	0.396783	17.5281	1.91058	0.547243	2.62295	0.0707891	0.84389	0.321733	440.908	3.59639	443.189	9.42007	456.011	55.1335	440.908	3.59639	96.688			895.395	13.8603	1157.28	96.4652
AOS17 106	470.608	3699.33	1.23758	17.4135	4.76708	0.526458	5.60158	0.0710657	0.616517	0.110061	442.573	2.63698	429.456	19.6188	360.634	125.708	442.573	2.63698	122.721			908.032	4.91193	1187.66	11.6898
AOS17 717	520.715	28891.2	10.2446	17.2312	4.32742	0.567087	4.4516	0.0712395	0.673329	0.151255	443.619	2.88655	456.129	16.3584	520.597	96.6022	443.619	2.88655	85.2135			920.279	72.6536	1588.07	191.173
AOS17 395	664.603	20062.4	2.75759	17.7032	2.49284	0.547975	2.66191	0.0713337	0.8467	0.31808	444.186	3.63428	443.669	9.56827	441.936	56.1412	444.186	3.63428	100.509			923.422	6.077	1167.73	207.826
AOS17 437	680.767	4502.29	2.00596	16.8639	1.82095	0.549938	4.30695	0.0713449	0.58568	0.135985	444.253	2.51427	444.956	15.5179	449.54	94.8163	444.253	2.51427	98.8239			934.494	8.23516	1040.25	43.1063
AOS17 184	930.905	11904	3.54833	17.3681	1.31971	0.557039	1.82095	0.0713782	0.804412	0.441754	444.453	3.45477	449.597	6.61485	476.943	36.1302	444.453	3.45477	93.1879			938.395	6.52182	1056.08	29.1501
AOS17 254	375.663	12569.6	1.50681	17.3436	3.48318	0.555741	3.61593	0.0714729	0.796032	0.220146	445.023	3.42302	448.751	13.1162	468.852	78.1122	445.023	3.42302	94.9175			943.768	5.95334	1184.84	41.6943
AOS17 860	394.212	6148.31	2.26064	17.5569	2.45978	0.53828	2.89956	0.0715375	0.675132	0.232839	445.412	2.90558	437.29	10.3027	395.7	63.2258	445.412	2.90558	112.563			945.91	11.0911	1548.19	20.9282
AOS17 1189	329.126	6010.15	2.34366	16.4337	5.89377	0.575134	6.05895	0.0716891	0.864481	0.142678	446.324	3.72785	461.33	22.4673	537.723	131.318	446.324	3.72785	83.0026			952.851	6.8973	766.787	85.012
AOS17 811	435.035	15294.4	1.30463	18.0262	3.44211	0.545055	3.57725	0.0720615	0.57648	0.161152	448.563	2.49796	441.752	12.8144	407.373	79.0236	448.563	2.49796	110.111			954.387	5.91076	843.677	51.4066
AOS17 423	689.458	16174.4	1.59466	17.6618	1.682	0.559639	2.23781	0.0722431	0.666875	0.298003	449.655	2.89645	451.292	8.15356	460.579	47.3864	449.655	2.89645	97.6282			956.096	13.6901	1272.64	417.691
AOS17 524	690.81	16469.4	4.36094	17.5745	2.16522	0.564661	2.35075	0.0724953	0.803185	0.341672	451.172	3.49984	454.556	8.61419	472.653	48.8847	451.172	3.49984	95.4551			959.532	9.69887	1137.54	25.2361
AOS17 153	492.769	24018.3	1.45776	17.3875	4.65302	0.572618	4.72818	0.072688	0.7607	0.160886	452.33	3.32293	459.706	17.4827	497.701	102.854	452.33	3.32293	90.8839			969.094	12.718	771.375	154.924
AOS17 1116	195.949	2670.44	1.09345	15.5517	7.62126	0.598656	8.19658	0.0727696	1.23669	0.150878	452.82	5.40781	476.38	31.1761	592.402	175.916	452.82	5.40781	76.438			970.324	7.86721	1014.69	17.522
AOS17 1140	411.408	7524.87	1.31641	16.1745	3.16511	0.605414	3.85287	0.0728723	0.993343	0.257819	453.437	4.34942	480.663	14.754	613.642	80.4497	453.437	4.34942	73.8927			972.233	9.75092	896.147	326.52
AOS17 183	296.355	6294.32	1.53771	16.9449	2.74978	0.576346	3.02955	0.07317	0.813367	0.268478	455.226	3.57494	462.11	11.2475	497.433	64.3047	455.226	3.57494	91.5149			981.234	16.6929	1379.81	39.0516
AOS17 45	145.245	3612.08	1.19845	16.0241	7.80716	0.592879	8.48649	0.0733262	1.77201	0.208803	456.164	7.8039	472.705	32.0838	554.767	181.346	456.164	7.8039	82.2262			981.966	7.82133	1030.08	24.2905
AOS17 496	442.941	9091.67	1.10559	17.2897	4.42609	0.567134	4.59965	0.0733262	0.721321	0.156821	456.164	3.17668	456.159	16.9034	457.079	100.838	456.164	3.17668	99.7998			983.301	15.622	988.581	316.216
AOS17 1110	1253.05	17455.3	1.25311	18.0849	1.25678	0.557787	1.50079	0.0733362	0.552403	0.368076	456.224	2.43308	450.085	5.45649	419.788	31.1589	456.224	2.43308	108.68			983.446	7.85449	827.087	139.306
AOS17 1025	534.187	11899	0.780917	17.4961	3.07269	0.566159	3.51162	0.0735201	0.532918	0.151758	457.329	2.35274	455.527	12.8903	447.396	77.1502	457.329	2.35274	102.22			986.056	6.53681	1172.54	88.6106
AOS17 180	392.499	10201.4	2.10091	18.2652	3.62943	0.543214	4.37792	0.0735719	0.793828	0.181325	457.64	3.50692	440.542	15.6487	353.135	97.2908	457.64	3.50692	129.593			987.413	11.2424	896.169	263.512
AOS17 374	581.118	28195.4	2.77729	18.1274	2.04434	0.554937	2.31589	0.0737896	0.84813	0.366222	458.947	3.75713	448.226	8.39244	394.534	48.328	458.947	3.75713	116.326			988.146	7.81414	837.902	39.841
AOS17 733	786	44576.1	1.98619	17.9987	1.24386	0.566147	1.4695	0.0740293	0.687655	0.467952	460.385	3.05546	455.519	5.39386	431.99	28.9373	460.385	3.05546	106.573			993.485	8.01149	1078.46	231.75
AOS17 1184	594.936	16138.4	1.27581	17.4509	2.4801	0.569381	2.70634	0.0741282	0.636449	0.235169	460.979	2.83145	457.614	9.97015	441.7	58.5409	460.979	2.83145	104.365			999.397	9.90796	1132.16	13.7674
AOS17 528	436.063	9562.43	1.88413	17.6697	3.34907	0.568859	3.50282	0.0741566	0.75258	0.214849	461.149	3.34929	457.276	12.8971	438.805	76.1542	461.149	3.34929	105.092			1002.7	6.32247	1238.99	24.5166
AOS17 815	818.32	32798.2	1.6946	18.0575	1.39135	0.566434	1.52535	0.074252	0.56101	0.367791	461.722	2.49972	455.706	5.60069	426.427	31.6449	461.722	2.49972	108.277			1003.55	13.3431	855.667	75.6369
AOS17 740	285.609	4655.99	1.50255	16.0791	5.91951	0.607523	7.17188	0.0744072	0.929631	0.129622	462.653	4.15026	481.997	27.528	576.008	154.786	462.653	4.15026	80.3207			1003.77	5.41653	1012.71	51.5631
AOS17 161	231.525	14940.7	0.871106	15.814	4.91496	0.652915	5.05949	0.0754253	0.989059	0.195486	468.759	4.47175	510.271	20.2955	701.815	105.691	468.759	4.47175	66.7924			1010.29	32.1451	911.162	293.307
AOS17 335	562.505	20370.2	6.65547	17.7441	2.86714	0.579815	3.05508	0.0754764	0.775293	0.253772	469.065	3.50747	464.342	11.3855	441.998	65.7622	469.065	3.50747	106.124			1013.22	6.57717	1073.16	175.429
AOS17 910	476.258	13193.9	1.57467	17.7418	1.50824	0.57309	2.08953	0.0756611	0.821624	0.39321	470.172	3.72553	460.011	7.72958	410.529	42.9919	470.172	3.72553	114.528			1013.81	6.62191	1088.41	16.8708
AOS17 817	462.64	11991.7	1.3263	17.6059	3.04591	0.586484	3.13813	0.0759807	0.581224	0.185214	472.087	2.64582	468.62	11.7799	452.617	68.4804	472.087	2.64582	104.302			1016.84	14.4592	889.066	82.3579
AOS17 267	324.497	7898.06	2.56645	17.3434	3.48728	0.583586	4.07806	0.0761454	0.953964	0.233926	473.074	4.35134	466.763	15.2609	436.791	88.3101	473.074	4.35134	108.307			1017.07	5.96396	1086.7	15.3683
AOS17 447	320.246	5542.39	1.10602	16.6898	2.67104	0.59925	3.18253	0.0761529	1.0133	0.318394	473.119	4.62239	476.758	12.1092	495.281	66.5037	473.119	4.62239	95.5254			1019.09	10.818	890.739	284.482
AOS17 282	505.006	19658.7	1.23979	17.612	3.41586	0.590395	3.65546	0.0761684	0.838133	0.229282	473.212	3.82407	471.12	13.7796	461.886	78.9117	473.212	3.82407	102.452			1023.01	6.84929	1044.48	187.281
AOS17 271	105.027	2175.95	1.13855	16.2561	8.27532	0.578846	12.9474	0.0766338	2.12944	0.164468	475.999	9.77094	463.719	48.2351	404.307	286.968	475.999	9.77094	117.732			1024.04	8.30464	911.209	91.949
AOS17 934	386.703	8154.92	1.45032	17.2413	7.20968	0.593409	7.76954	0.0767766	0.82509	0.106196	476.854	3.79248	473.042	29.3882	455.566	171.664	476.854	3.79248	104.673			1029.78	7.58925	1084.39	19.5744
AOS17 264	384.47	15913.3	1.93194	17.0649	2.58135	0.60949	2.75463	0.0769449	0.806983	0.292955	477.861	3.7168	483.239	10.5922	509.806	57.9311	477.861	3.7168	93.7341			1030.07	6.85583	929.88	91.2635
AOS17 6	68.4728	1463.04	1.23348	11.4483	11.1677	0.831614	11.9102	0.076968	3.652	0.306627	478	16.8251	614.507	54.9619	1156.93	225.572	478	16.8251	41.3161			1031.1	9.00985	1144.7	98.6264
AOS17 537	168.261	3013.35	2.10202	15.0788	4.71733	0.66329	8.22208	0.0771549	0.742294	0.0902806	479.118	3.42752	516.624	33.3045	687.096	175.032	479.118	3.42752	69.7309			1033.11	9.58277	770.201	234.574
AOS17 1146	453.21	12192.2	1.76183	16.421	2.27665	0.639082	2.90121	0.0775034	0.716637	0.247013	481.203	3.32292	501.738	11.4864	597.461	60.9157	481.203	3.32292	80.5413			1038.3	9.15596	1293.54	16.495
AOS17 348	523.799	11722.3	1.40447	17.5783	3.29707	0.599009	3.39137	0.0779594	0.629615	0.185652	483.931	2.93535	476.605	12.9006	442.443	74.1335	483.931	2.93535	109.377			1041.25	8.49375	910.625	53.7721
AOS17 65	514.998	9437	5.07804	17.4677	3.98106	0.60655	4.28083	0.0785235	0.704278	0.164519	487.304	3.30546	481.382	16.4123	454.265	93.7781	487.304	3.30546	107.273			1043.43	12.6762	918.094	103.457
AOS17 346	547.405	13672.8	0.943064	17.3626	2.75271	0.614151	3.13384	0.0786785	0.825426	0.263391	488.23	3.88115	486.175	12.1076	477.44	66.8613	488.23	3.88115	102.26			1049.29	8.66872	1309.07	33.6316
AOS17 898	1413.48	16379	2.41399	15.8252	0.778542	0.676827	1.12032	0.0788515	0.607918	0.542629	489.264	2.86425	524.855	4.5916	683.79	20.1101	489.264	2.86425	71.5518			1051.66	8.93343	1355.7	250.22
AOS17 840	76.6404	1865.61	1.91804	13.5745	13.6275	0.718062	17.3344	0.0790618	1.77385	0.102331	490.52	8.37828	549.522	73.6924	803.168	363.66	490.52	8.37828	61.0732			1055.23	7.28431	1160.93	42.5298
AOS17 202	955.468	4891.19	2.53627	15.5346	1.34987	0.67725	2.64304	0.0791066	0.67485	0.255331	490.788	3.18914	525.111	10.8368	678.186	54.6413	490.788	3.18914	72.3677			1055.38	6.68586	1081.66	19.3105
AOS17 607	291.573	8523.1	1.80848	18.7545	3.67107	0.565073	4.81573	0.0794286	0.806221	0.167414	492.711	3.82433	454.823	17.6565	268.579	108.944	492.711	3.82433	183.451			1057.35	7.57842	1153.63	287.394
AOS17 186	140.049	5706.39	0.838528	14.7644	7.2486	0.718372	8.11049	0.0795519	1.12397	0.138583	493.447	5.33926	549.705	34.441	791.119	168.809	493.447	5.33926	62.3733			1063.51	9.77674	1627.01	281.087
AOS17 1090	396.134	39020.5	1.00625	17.1155	3.63246	0.658028	3.693	0.0812713	0.614176	0.166308	503.707	2.97587	513.407	14.8831	557.797	79.4502	503.707	2.97587	90.3029			1065.4	9.63964	941.299	81.4448
AOS17 604	452.891	7135.06	4.7139	17.3874	3.65186	0.624435	4.57019	0.0814105	1.22226	0.267443	504.537	5.93161	492.624	17.84	438.561	98.0604	504.537	5.93161	115.044			1066.04	4.82937	957.782	83.567
AOS17 676	463.344	14478.3	0.650061	16.4851	1.43448	0.6717	2.23431	0.0816037	0.907219	0.40604	505.688	4.41237	521.745	9.11595	593.63	44.2693	505.688	4.41237	85.1857			1067.8	11.0492	848.102	99.0611
AOS17 87	758.253	62711.9	1.19976	16.6968	1.74274	0.672675	1.88014	0.0818305	0.696983	0.370707	507.04	3.39857	522.338	7.67756	590.721	37.8651	507.04	3.39857	85.834			1068.62	8.30666	825.103	108.894
AOS17 272	126.597	2720.85	1.60913	15.6249	10.7521	0.663798	11.8957	0.0821096	1.79984	0.151302	508.702	8.80388	516.935	48.2259	554.457	257.355	508.702	8.80388	91.7479			1069.91	6.11693	972.407	57.9391
AOS17 505	1110.35	16239.5	0.58556	16.4212	1.16295	0.679887	1.57216	0.0823155	1.01593	0.646201	509.929	4.98093	526.706	6.46084	601.023	25.9545	509.929	4.98093	84.8434			1071.95	6.03123	1349.33	14.355
AOS17 653	60.1847	1836.09	2.15449	12.8105	0.498507	0.805322	5.08236	0.0830846	4.06809	0.800435	514.508	20.1173	599.826	23.0242	937.966	62.4576	514.508	20.1173	54.8536			1073.17	8.7195	892.467	121.537
AOS17 535	207.671	5351.81	2.24017	17.7758	3.73939	0.631964	4.02021	0.0844859	0.949717	0.236235	522.843	4.7695	497.318	15.8087	382.434	87.8268	522.843	4.7695	136.715			1074.14	10.9056	1377.83	34.7645
AOS17 1200	899.079	20192	1.89386	16.9804	2.62336	0.677065	2.7285	0.0847289	0.654841	0.24	524.287	3.29734	524.999	11.1854	529.07	58.0403	524.287	3.29734	99.0961			1084.62	9.53446	942.895	107.547
AOS17 171	1182.55	35435.7	11.6258	15.9603	2.02134	0.741302	2.15382	0.085666	0.688093	0.319476	529.854	3.50008	563.165	9.31047	701.029	43.4482	529.854	3.50008	75.5824			1085.45	8.03191	1149.27	38.3755
AOS17 620	704.969	23369.9	1.20236	17.462	0.998324	0.676175	1.33836	0.0868037	0.658392	0.491941	536.606	3.38993	524.46	5.48209	472.89	25.7799	536.606	3.38993	113.474			1086.55	18.2185	900.628	259.074
AOS17 1145	189.146	5255.72	2.09947	16.0994	5.59619	0.716763	6.15017	0.08744	0.752244	0.122313	540.379	3.89926	548.754	26.0782	584.644	132.59	540.379	3.89926	92.4287			1087.42	11.5959	1161.82	366.875
AOS17 40	514.583	22157	1.18347	16.4167	3.75835	0.738905	3.876	0.088119	0.740533	0.191056	544.403	3.86594	561.766	16.725	633.691	81.93	544.403	3.86594	85.9099			1090.31	8.45784	1104.61	127.805
AOS17 1177	301.546	21271.2	12.2983	16.2965	2.67316	0.733814	2.95602	0.0883487	0.88218	0.298435	545.764	4.61645	558.789	12.7041	613.125	60.9526	545.764	4.61645	89.0135			1092.16	8.84887	1181.4	53.4158
AOS17 1191	188.188	12177.3	1.54942	18.0565	7.18205	0.658641	7.34334	0.0884193	1.09778	0.149493	546.182	5.74889	513.782	29.6171	373.079	163.668	546.182	5.74889	146.398			1092.81	47.6768	747.78	322.382
AOS17 470	144.671	6000.1	1.59525	16.8054	7.73387	0.706048	7.97975	0.0894126	1.40577	0.176168	552.063	7.43773	542.397	33.5444	502.952	173.121	552.063	7.43773	109.764			1095.8	7.06498	990.627	65.9247
AOS17 473	367.537	9379.88	0.569613	17.077	5.73085	0.708626	5.99866	0.0899167	0.998521	0.166457	555.044	5.31034	543.93	25.2664	498.564	130.408	555.044	5.31034	111.329			1098.18	7.0706	953.127	47.5928
AOS17 483	607.799	11718.5	1.39933	16.757	2.31575	0.734584	2.51233	0.0911288	0.575254	0.228972	562.209	3.09712	559.24	10.8036	548.146	53.4	562.209	3.09712	102.566			1101.14	11.243	2293.14	121.649
AOS17 422	668.281	10766.9	1.17606	16.9174	0.971301	0.738072	1.45281	0.0914883	0.789715	0.543576	564.333	4.26712	561.28	6.26435	549.882	26.6268	564.333	4.26712	102.628			1101.9	8.05591	975.187	74.3343
AOS17 211	226.319	4660.41	1.45436	17.6501	4.31503	0.68097	5.23922	0.092179	0.720817	0.137581	568.411	3.92177	527.36	21.5541	354.377	117.294	568.411	3.92177	160.397			1101.93	7.4208	1246.43	160.981
AOS17 1061	718.448	48255.2	4.26794	16.7047	2.85243	0.764105	3.05999	0.0922502	1.04574	0.341746	568.832	5.6936	576.375	13.4587	607.149	62.2062	568.832	5.6936	93.6889			1101.97	7.98758	1166.92	299.263
AOS17 351	279.487	4025.13	0.861831	16.1129	6.53569	0.747813	6.89648	0.092644	0.824684	0.11958	571.155	4.50759	566.954	29.9696	551.075	149.642	571.155	4.50759	103.644			1102.83	8.14799	1131.23	24.0099
AOS17 1086	519.247	3245.36	2.05107	16.2075	2.08143	0.745773	3.07168	0.0927612	0.74497	0.242528	571.846	4.0766	565.769	13.3245	542.346	65.162	571.846	4.0766	105.439			1105.46	5.60799	1573.78	11.8588
AOS17 992	619.881	7504.39	2.93042	16.8871	2.60323	0.735362	2.81006	0.0928692	0.757492	0.269564	572.484	4.14954	559.695	12.0914	508.989	59.529	572.484	4.14954	112.475			1118.74	10.6724	1241.76	448.725
AOS17 247	94.2043	2336.74	0.829686	14.6068	3.48271	0.80997	4.103	0.0934101	0.967923	0.235906	575.674	5.33052	602.437	18.6457	705.409	84.8634	575.674	5.33052	81.6085			1132.52	7.24747	1208.54	35.2967
AOS17 715	1008.07	33028.7	0.866476	16.749	1.11899	0.774737	1.30337	0.0944763	0.553694	0.424817	581.956	3.08109	582.477	5.77727	585.47	25.5982	581.956	3.08109	99.3998			1135.32	13.5183	1461.67	20.8276
AOS17 525	180.744	4458.11	1.74649	15.7159	3.48673	0.796925	3.88718	0.0949152	0.787046	0.202472	584.541	4.39819	595.093	17.5063	636.478	81.9235	584.541	4.39819	91.8399			1135.9	6.89663	1013.09	46.6928
AOS17 54	582.301	20803.6	2.03988	16.7978	1.39781	0.776555	1.55278	0.0952968	0.631875	0.406931	586.788	3.54402	583.516	6.89193	571.737	30.8511	586.788	3.54402	102.632			1137.88	29.0007	1618.7	289.402
AOS17 371	720.663	18988.4	1.18484	16.6847	2.20794	0.7756	2.37221	0.0954277	0.644465	0.271672	587.558	3.61917	582.971	10.5219	566.11	49.7177	587.558	3.61917	103.789			1138.27	12.0927	1585.15	931.994
AOS17 22	249.132	13132.9	1.8828	16.401	5.64167	0.796795	5.77532	0.0954831	0.715547	0.123898	587.884	4.02048	595.019	26.0105	623.236	123.673	587.884	4.02048	94.3276			1142.37	12.5483	972.428	261.439
AOS17 10	129.117	8369.85	1.10554	14.77	9.17594	0.880539	9.41597	0.0958148	1.07402	0.114064	589.835	6.05378	641.274	44.7964	827.855	195.514	589.835	6.05378	71.2486			1156.35	10.6053	1299.47	600.412
AOS17 1017	101.288	3093.34	2.52404	17.9318	4.84592	0.676767	5.6502	0.0961018	1.02521	0.181447	591.523	5.79445	524.818	23.1598	245.208	128.041	591.523	5.79445	241.233			1157.06	6.82904	1209.26	77.9858
AOS17 206	166.628	6451.93	0.829685	14.7424	6.67329	0.880067	6.79105	0.0963105	0.993168	0.146247	592.751	5.62446	641.019	32.2891	815.959	140.552	592.751	5.62446	72.6447			1162.02	6.75828	1169.9	253.327
AOS17 392	363.902	8541.43	3.6207	15.5523	3.30284	0.831679	3.54135	0.0964228	1.07229	0.302791	593.411	6.07899	614.543	16.3284	694.145	71.9608	593.411	6.07899	85.488			1164.1	8.94382	1195.3	56.9626
AOS17 1052	194.984	11787.3	0.563302	16.0546	8.15017	0.819088	8.25029	0.0966311	1.16458	0.141156	594.636	6.6152	607.539	37.7377	656.895	175.432	594.636	6.6152	90.5222			1175.14	11.649	1151.69	221.593
AOS17 886	431.444	13382.7	0.964364	15.9277	2.53613	0.828015	3.05877	0.0967729	0.603861	0.197419	595.469	3.43472	612.51	14.069	676.984	64.1102	595.469	3.43472	87.959			1175.26	11.3889	1275.19	176.893
AOS17 258	331.904	5973.54	0.621879	15.8792	3.24316	0.805915	3.83068	0.0967812	1.01642	0.265337	595.518	5.78181	600.16	17.3596	618.655	79.7296	595.518	5.78181	96.2601			1176.81	11.4007	1436.79	38.5441
AOS17 198	482.798	12675.9	1.57632	16.3363	1.48288	0.809257	2.0239	0.0970162	0.750092	0.370617	596.899	4.27626	602.037	9.19216	622.349	40.544	596.899	4.27626	95.9107			1182.78	12.6027	1534.58	10.3428
AOS17 1171	600.127	15995.5	3.34147	15.2031	1.11944	0.865373	1.54076	0.0974527	0.828358	0.537629	599.463	4.74182	633.052	7.25789	755.802	27.3966	599.463	4.74182	79.3149			1189.63	10.2092	1188.47	20.9937
AOS17 1162	693.437	15862	1.33525	16.7202	1.62752	0.798835	1.95386	0.09804	0.569077	0.291258	602.912	3.27548	596.171	8.8105	571.534	40.6456	602.912	3.27548	105.49			1208.54	51.0226	2269.56	893.852
AOS17 1129	281.221	7698.95	1.50578	16.1003	4.56768	0.829932	4.72403	0.0984814	0.732673	0.155095	605.503	4.23438	613.575	21.7579	644.435	100.337	605.503	4.23438	93.9588			1219.51	7.88061	1166.79	45.3206
AOS17 731	710.35	24739.9	1.06044	16.5349	1.98883	0.819318	2.17634	0.0987398	0.687565	0.315928	607.019	3.98317	607.668	9.95209	611.007	44.6282	607.019	3.98317	99.3474			1220.2	15.3418	1646	141.048
AOS17 138	1442.77	65402.9	1.84035	16.7066	1.33976	0.819336	1.5492	0.0992753	0.764858	0.493711	610.16	4.4528	607.678	7.08425	599.384	29.1728	610.16	4.4528	101.798			1220.27	11.3838	1878.11	14.7602
AOS17 18	795.494	17042.3	1.64452	15.9964	1.32632	0.85911	1.72304	0.0999505	0.848453	0.492415	614.119	4.97002	629.637	8.08499	686.722	32.0063	614.119	4.97002	89.4276			1222.15	8.37666	1079.54	45.886
AOS17 1102	677.664	19746.8	1.05711	16.4736	1.12028	0.836233	1.55966	0.0999773	0.543589	0.34853	614.276	3.18498	617.065	7.21219	628.226	31.4985	614.276	3.18498	97.7794			1225.41	11.8695	1406.75	45.19
AOS17 972	357.979	11613.6	1.32538	15.5263	4.92527	0.856032	5.15743	0.100184	0.894842	0.173505	615.486	5.25287	627.954	24.1574	674.047	108.667	615.486	5.25287	91.3121			1228.64	45.6393	1792.15	418.844
AOS17 203	151.143	9841.91	1.18124	16.2406	7.68128	0.839865	8.12677	0.100322	1.37091	0.16869	616.293	8.05752	619.071	37.6852	630.201	172.809	616.293	8.05752	97.7931			1256.79	14.8663	1542.74	237.735
AOS17 1147	722.619	30559.9	1.83316	16.6267	1.64981	0.826959	2.02711	0.100353	0.958461	0.472821	616.478	5.63497	611.924	9.31697	596.03	38.7006	616.478	5.63497	103.431			1257.81	8.3209	1480.87	71.8759
AOS17 675	673.209	28512.6	0.840059	16.5683	2.10567	0.829819	2.2068	0.100496	0.646449	0.292936	617.316	3.80552	613.512	10.1621	600.417	45.7053	617.316	3.80552	102.815			1262.37	12.2868	1557.48	31.7832
AOS17 236	390.593	14282.4	2.69014	16.3824	1.40514	0.851388	1.76181	0.100637	0.840293	0.476949	618.141	4.95294	625.411	8.22675	652.726	33.2561	618.141	4.95294	94.7015			1264.71	7.45622	1380.34	28.141
AOS17 1005	2141.89	205144	1.2584	16.4142	0.765992	0.854498	0.958071	0.101328	0.574233	0.599364	622.189	3.40581	627.115	4.48244	645.879	16.4785	622.189	3.40581	96.332			1270.89	8.47374	1141.67	54.5274
AOS17 978	1028.99	37492	2.00471	16.6411	0.606054	0.827728	0.983506	0.101399	0.711921	0.723861	622.601	4.22511	612.351	4.52257	575.56	14.7328	622.601	4.22511	108.173			1279.61	12.6914	1401.63	62.7893
AOS17 91	778.779	13171.1	2.54194	16.588	1.15059	0.830063	1.46673	0.101789	0.83085	0.566466	624.887	4.94817	613.647	6.75508	573.351	26.2961	624.887	4.94817	108.989			1284.97	11.84	1463.39	80.8163
AOS17 654	482.473	26343.9	0.721092	16.228	2.90032	0.86917	3.03936	0.10318	0.580471	0.190984	633.021	3.49985	635.117	14.3515	643.54	64.1423	633.021	3.49985	98.3655			1288.57	9.94518	1461.7	16.1491
AOS17 467	938.4	5565.09	1.51629	15.7017	1.63947	0.880088	2.18968	0.104264	0.64191	0.293152	639.347	3.90708	641.03	10.4082	647.921	44.9693	639.347	3.90708	98.6768			1289.46	9.88754	1315.24	54.5584
AOS17 369	457.873	4982.97	0.862859	15.3223	1.991	0.896134	3.33564	0.104608	0.638582	0.191442	641.359	3.89846	649.659	16.0084	679.516	69.9704	641.359	3.89846	94.3846			1289.68	6.5042	1317.71	240.846
AOS17 350	147.398	5350.53	1.57611	14.8794	4.85863	0.932502	5.02785	0.104676	0.690674	0.13737	641.755	4.21895	668.95	24.6392	762.562	105.028	641.755	4.21895	84.1578			1299.84	10.0051	1278.5	378.806
AOS17 43	139.643	5458.4	1.21344	15.8472	9.87205	0.882068	10.4354	0.104858	0.952121	0.0912391	642.817	5.82514	642.099	49.6998	640.531	224.049	642.817	5.82514	100.357			1312.62	10.2937	1171.82	29.5224
AOS17 522	264.026	23958.7	0.597449	15.4669	3.3349	0.929928	3.5227	0.10519	0.747359	0.212155	644.751	4.58547	667.597	17.2367	746.398	72.7781	644.751	4.58547	86.3816			1335.1	9.21328	1288.61	212.071
AOS17 642	367.486	6179.91	1.90257	15.2484	2.78628	0.919037	3.27506	0.105221	1.01801	0.310838	644.931	6.24775	661.851	15.927	720.827	66.0567	644.931	6.24775	89.471			1338.69	10.7792	1869.91	21.4082
AOS17 1144	415.907	11681.8	0.822174	16.0171	2.43541	0.886782	2.6093	0.105221	0.855173	0.32774	644.936	5.2484	644.639	12.4529	644.554	52.974	644.936	5.2484	100.059			1341.89	12.1034	1215.58	151.209
AOS17 228	228.453	7108.95	0.901057	16.0268	1.46342	0.898226	2.12696	0.107045	0.525496	0.247065	655.561	3.27557	650.779	10.2198	635.186	44.3455	655.561	3.27557	103.208			1344.44	11.9099	1192.51	86.4526
AOS17 1065	498.62	7957.67	1.31427	15.3354	2.12195	0.98058	3.19307	0.110687	1.037	0.324765	676.735	6.66194	693.902	16.0533	750.832	63.8136	676.735	6.66194	90.1314			1350.65	9.69436	1329.69	558.531
AOS17 152	186.291	6059.47	1.91359	14.5541	8.55296	1.03349	8.69763	0.112874	0.921133	0.105906	689.417	6.02267	720.672	44.9136	820.147	180.929	689.417	6.02267	84.0601			1360.9	10.1832	1537.44	66.6685
AOS17 838	1124.15	72298.3	2.38847	15.7784	0.705275	1.00757	0.980614	0.115694	0.664678	0.677819	705.733	4.4432	707.646	4.9973	714.625	15.3285	705.733	4.4432	98.7557			1371.44	42.6626	2613.54	52.9134
AOS17 154	523.671	35846.1	3.00148	15.612	1.51297	1.07231	1.77684	0.121696	0.842259	0.474021	740.317	5.89066	739.873	9.33588	739.432	33.0842	740.317	5.89066	100.12			1372.17	9.66371	1685.99	18.9803
AOS17 539	411.948	10065.1	1.7811	15.5003	1.42663	1.09905	1.62018	0.124408	0.602469	0.371854	755.886	4.29713	752.891	8.61385	744.901	31.7753	755.886	4.29713	101.475			1372.48	14.0437	1349.94	230.789
AOS17 354	249.375	6978.44	1.55195	14.9611	2.73333	1.12789	3.34662	0.125871	0.866405	0.25889	764.265	6.24417	766.747	18.0135	774.883	68.0175	764.265	6.24417	98.6297			1385.04	38.8264	1815.41	655.288
AOS17 420	530.672	21847.4	3.05988	15.2631	1.62218	1.17624	1.81867	0.129848	0.708904	0.389792	786.997	5.25195	789.559	9.9813	797.693	35.1203	786.997	5.25195	98.6592			1387.87	11.011	1342.56	80.2591
AOS17 123	179.811	10772.6	1.12869	14.6116	2.61262	1.21378	2.95151	0.130007	0.930527	0.315271	787.908	6.90135	806.928	16.4331	860.665	58.1561	787.908	6.90135	91.5464			1394.29	8.42186	1563.38	33.3516
AOS17 406	340.716	13449.7	2.96316	14.1309	3.00688	1.27409	3.44064	0.132148	0.704888	0.204871	800.109	5.30391	834.218	19.5756	927.046	69.1824	800.109	5.30391	86.3074			1395.45	9.36428	1553.91	53.7137
AOS17 232	525.007	14191.4	5.45823	15.3117	2.12272	1.18647	2.24581	0.132761	0.642492	0.286085	803.595	4.8542	794.323	12.3748	769.288	45.337	803.595	4.8542	104.46			1398.33	9.49664	1615.5	423.238
AOS17 357	328.945	8895.68	5.80815	15.0043	3.88053	1.20801	3.96057	0.134033	0.764674	0.193072	810.832	5.82614	804.278	22.0052	787.067	81.6005	810.832	5.82614	103.019			1403.93	14.4156	1242.58	155.081
AOS17 81	221.555	18808.8	1.44508	15.4572	2.76267	1.18374	2.92634	0.134124	0.763571	0.26093	811.351	5.82123	793.054	16.1082	742.86	59.729	811.351	5.82123	109.22			1425.46	68.7388	1791.92	53.7551
AOS17 555	248.98	3380.19	1.43944	13.5922	2.94886	1.28743	3.69152	0.134423	0.981232	0.265807	813.05	7.49531	840.156	21.0996	913.364	73.2546	813.05	7.49531	89.0171			1432.22	13.2284	1680.91	35.9749
AOS17 1064	272.389	28215.7	5.01113	15.3394	3.07493	1.21754	3.30722	0.134706	1.04086	0.314724	814.656	7.96555	808.649	18.4396	793.038	65.8631	814.656	7.96555	102.726			1451.66	11.8639	1899.06	10.2426
AOS17 819	289.732	17790.5	3.81767	14.2865	1.64026	1.3232	1.93704	0.137711	0.877633	0.45308	831.708	6.84809	855.912	11.2027	920.066	35.5004	831.708	6.84809	90.3966			1460.72	10.2301	1668.94	11.7039
AOS17 1095	762.724	16661.4	8.21755	14.656	1.48436	1.2992	1.74842	0.137879	0.728293	0.416544	832.657	5.68887	845.37	10.032	879.781	32.8862	832.657	5.68887	94.6437			1484.98	11.636	1821.8	15.731
AOS17 173	280.09	21380.1	1.25901	14.8998	2.1576	1.29045	2.50487	0.139931	0.869005	0.346927	844.275	6.87665	841.496	14.3306	835.059	48.9754	844.275	6.87665	101.104			1488.8	7.42895	2262.5	27.006
AOS17 1136	970.873	30998.9	2.95383	14.2875	1.21785	1.35247	1.43214	0.140089	0.717805	0.501211	845.167	5.68579	868.624	8.36044	929.835	25.4413	845.167	5.68579	90.8943			1491.16	10.8824	1661.08	124.603
AOS17 224	194.83	7702.79	1.45889	14.4557	4.266	1.30514	4.66243	0.140659	0.670704	0.143853	848.387	5.33164	847.99	26.8104	847.875	95.9989	848.387	5.33164	100.06			1491.9	18.0788	1703.55	27.0817
AOS17 60	341.019	23688.2	2.78661	14.9332	1.44177	1.29785	1.6273	0.140715	0.714707	0.439197	848.704	5.68341	844.774	9.33285	835.389	30.4817	848.704	5.68341	101.594			1499.98	9.54355	1518.03	35.3082
AOS17 1152	81.9988	5671.91	1.99346	14.2419	5.62491	1.47203	6.74384	0.156775	1.38158	0.204866	938.829	12.0705	918.962	40.7975	872.468	136.865	872.468	136.865	107.606			1504.12	17.936	1384.68	199.619
AOS17 1188	199.649	9321.15	8.49445	14.143	2.38795	1.51253	3.32854	0.159996	1.70708	0.512863	956.753	15.1784	935.464	20.3486	886.535	59.0875	886.535	59.0875	107.921			1529.59	11.4386	1764.99	99.1734
AOS17 384	131.004	5728.87	1.53671	13.9795	2.94971	1.54935	3.08714	0.163024	0.610538	0.197768	973.562	5.51689	950.234	19.0527	897.461	62.4494	897.461	62.4494	108.48			1531.08	26.8856	1776.03	147.997
AOS17 678	183.274	5372.25	3.21263	13.9408	2.05432	1.43133	2.84252	0.150226	1.61456	0.568003	902.229	13.5936	902.106	16.993	902.684	48.2162	902.684	48.2162	99.9496			1531.84	13.3293	1971.16	25.8272
AOS17 146	225.093	15697.1	1.62926	14.319	3.9865	1.52527	4.13319	0.159973	0.829683	0.200736	956.628	7.37615	940.6	25.3539	904.131	83.4767	904.131	83.4767	105.806			1559.87	23.1584	2609.74	33.9516
AOS17 967	623.05	30597.7	1.62556	14.0363	0.859623	1.54623	1.51109	0.161497	1.07528	0.711595	965.088	9.63798	948.989	9.31768	912.71	21.8332	912.71	21.8332	105.739			1600.22	9.89959	1697.58	277.642
AOS17 965	396.496	16095.5	1.43944	13.9022	0.968793	1.60024	1.5465	0.166509	0.689139	0.445612	992.85	6.34126	970.305	9.66419	920.506	28.4833	920.506	28.4833	107.859			1605.05	8.31139	1765.72	20.9712
AOS17 774	333.358	3187.18	1.65667	13.3134	1.26201	1.52043	1.81217	0.157385	0.936853	0.516978	942.226	8.21249	938.652	11.1004	931.146	31.8583	931.146	31.8583	101.19			1610.91	6.55775	2060.71	22.5158
AOS17 962	704.916	30235.8	3.48289	13.7245	0.647179	1.59116	1.01943	0.163865	0.748799	0.734529	978.221	6.79623	966.753	6.35641	941.679	14.1758	941.679	14.1758	103.881			1623.48	9.81926	1844.68	44.5306
AOS17 1031	332.613	16560.6	1.58142	13.9701	2.37923	1.54417	2.67247	0.158803	0.718924	0.269011	950.119	6.3511	948.17	16.4714	944.522	52.725	944.522	52.725	100.593			1652.05	10.9966	1707.88	34.1562
AOS17 299	136.028	10487.5	0.620916	13.8396	2.61079	1.6047	2.71889	0.164991	0.594109	0.218511	984.454	5.42404	972.043	17.0098	945.003	54.3284	945.003	54.3284	104.175			1670.43	12.6779	1503.01	72.2745
AOS17 577	122.586	9819.33	0.84372	13.917	3.66795	1.63215	4.1628	0.167536	0.91831	0.220599	998.524	8.49467	982.689	26.2157	948.39	83.126	948.39	83.126	105.286			1695.98	7.96375	1822.34	25.8381
AOS17 1111	165.608	6539.03	1.60466	13.8783	1.94097	1.66085	2.36793	0.170201	0.787355	0.332508	1013.22	7.38228	993.701	15.0086	951.773	45.6955	951.773	45.6955	106.456			1703.58	13.3167	1801.73	17.3376
AOS17 394	161.361	6637.2	2.3073	13.6779	2.13402	1.67943	3.49792	0.17152	0.856306	0.244804	1020.48	8.08189	1000.77	22.2653	958.691	69.332	958.691	69.332	106.445			1703.84	10.1482	1704.19	32.826
AOS17 225	306.003	14571.9	3.5744	13.8436	1.5147	1.67727	1.95986	0.170766	0.580831	0.296364	1016.33	5.46133	999.948	12.4677	965.111	38.2089	965.111	38.2089	105.307			1803.97	10.1753	1798.1	26.4524
AOS17 590	257.677	18141.7	3.83973	14.0172	1.87953	1.59816	2.27374	0.162654	0.927378	0.407864	971.511	8.36354	969.492	14.2021	965.826	42.3662	965.826	42.3662	100.589			1848.08	20.8754	2078.33	46.3041
AOS17 554	158.535	14192.5	2.74564	13.8423	3.19781	1.76295	3.34376	0.17917	0.875616	0.261866	1062.44	8.57671	1031.93	21.6669	968.695	65.8677	968.695	65.8677	109.677			1849.67	11.9413	2505.49	63.8844
AOS17 141	501.528	25965.3	26.2603	13.9041	1.06521	1.59654	1.49231	0.162192	1.02704	0.688224	968.949	9.23973	968.859	9.31721	969.549	22.0965	969.549	22.0965	99.9381			1859.18	11.9961	1903.14	16.9089
AOS17 964	460.353	14751.9	3.1008	13.5589	2.24513	1.7292	2.3878	0.175621	0.733531	0.3072	1043.01	7.06392	1019.45	15.3628	970.104	46.3458	970.104	46.3458	107.515			1910.4	10.558	2060.88	40.9913
AOS17 115	121.862	6801.22	2.04012	13.7497	3.98456	1.73402	4.19797	0.176102	0.726156	0.172978	1045.64	7.00919	1021.24	27.0411	970.213	84.4062	970.213	84.4062	107.775			1921.96	84.6102	1238.57	1839.83
AOS17 704	113.894	3990.49	1.45487	13.3272	3.81632	1.49966	5.66386	0.152279	0.713108	0.125905	913.724	6.07513	930.247	34.5161	970.517	114.71	970.517	114.71	94.1482			1947.47	17.9589	2696.63	69.1716
AOS17 21	127.546	7955.09	2.42297	13.7851	5.89085	1.61438	6.44354	0.16371	1.3017	0.202016	977.361	11.8048	975.811	40.4223	973.23	128.801	973.23	128.801	100.424			1966.48	12.2912	2003.74	12.1333
AOS17 570	189.791	10389.4	2.45522	13.7105	2.40524	1.68227	2.61533	0.170457	0.870933	0.333011	1014.63	8.17641	1001.84	16.6567	974.835	50.2659	974.835	50.2659	104.082			2083.96	41.2832	2282.03	80.7716
AOS17 58	155.097	1915.99	2.10834	12.7332	3.77498	1.59311	4.48899	0.161238	0.831555	0.185243	963.654	7.44314	967.515	28.01	977.174	89.9395	977.174	89.9395	98.6164			2148.04	11.6476	2836.21	33.4651
AOS17 719	129.538	5084.92	2.51018	13.4714	4.00838	1.70469	4.93588	0.172516	0.766604	0.155312	1025.96	7.27109	1010.29	31.5982	977.351	99.4206	977.351	99.4206	104.973			2151.98	73.9086	2891.08	12.5961
AOS17 1127	294.698	13145.5	1.90905	13.9497	2.95876	1.64295	3.33516	0.16615	0.744765	0.223307	990.866	6.84045	986.846	21.0545	978.783	66.2719	978.783	66.2719	101.234			2196.58	20.0387	2546.27	53.6705
AOS17 567	172.133	18626.4	3.4944	13.775	3.12606	1.59822	3.35741	0.161626	0.843137	0.251127	965.806	7.56242	969.516	20.9728	978.805	66.2487	978.805	66.2487	98.672			2212.6	24.8186	2696.19	119.048
AOS17 1015	293.041	16091.3	2.0534	13.7743	1.5198	1.64522	1.67622	0.16626	0.67439	0.402329	991.469	6.19756	987.718	10.5861	980.262	31.2543	980.262	31.2543	101.143			2246.42	14.3798	2500.62	24.1523
AOS17 448	609.188	24298	3.23724	13.7525	1.22885	1.70078	1.41015	0.171687	0.619103	0.439034	1021.4	5.848	1008.82	9.01705	982.513	25.7994	982.513	25.7994	103.958			2274.17	20.7203	2739.92	31.8918
AOS17 330	194.549	13459.2	1.96433	13.718	1.80869	1.79578	2.00825	0.180923	0.801425	0.399066	1072.01	7.91504	1043.93	13.0985	986.502	37.4771	986.502	37.4771	108.668			2375.31	19.8907	2717.12	26.6937
AOS17 1176	232.166	40622.7	2.42443	13.7068	1.29316	1.80023	1.61229	0.181149	0.915834	0.568033	1073.25	9.05453	1045.54	10.525	988.991	26.9742	988.991	26.9742	108.519			2427.19	30.169	2685.93	20.2841
AOS17 52	803.972	42290.5	2.15586	13.8241	0.830245	1.67534	1.15015	0.168535	0.788616	0.685663	1004.03	7.33216	999.214	7.31335	989.522	17.0294	989.522	17.0294	101.466			2435.52	10.8139	2736.55	31.8343
AOS17 485	159.228	4756.66	4.91242	13.2753	4.32835	1.73504	4.58781	0.174488	0.729345	0.158975	1036.79	6.98505	1021.62	29.56	990.169	92.1698	990.169	92.1698	104.709			2496.72	49.9223	2590.74	283.734
AOS17 381	153.096	10768.9	2.65432	13.544	2.74438	1.8092	3.04389	0.181834	1.22033	0.40091	1076.99	12.1036	1048.79	19.9076	991.418	56.7154	991.418	56.7154	108.631			2607.97	305.499	NA	NA
AOS17 50	53.7703	2760.22	2.82934	12.9792	5.30673	1.70594	7.16554	0.171333	1.69781	0.236941	1019.45	16.0092	1010.76	45.9008	992.861	141.704	992.861	141.704	102.678			2622.4	14.7683	2746.4	53.6428
AOS17 1018	341.204	17485.4	6.69654	13.6848	2.04458	1.61482	2.23865	0.162096	0.690378	0.308391	968.413	6.20776	975.983	14.0387	993.923	43.2793	993.923	43.2793	97.4335			2838.26	1134.75	NA	NA
AOS17 873	186.212	6700.99	0.686126	13.4443	3.23499	1.71576	3.32971	0.172187	0.643918	0.193385	1024.15	6.09751	1014.44	21.3632	994.441	66.4248	994.441	66.4248	102.987			3071.03	24.0442	2992.46	107.794
AOS17 1169	326.763	26732.5	2.67274	13.6161	1.40637	1.73273	1.7298	0.173629	0.918386	0.530921	1032.07	8.75859	1020.77	11.1372	997.464	29.7707	997.464	29.7707	103.47		Total	259
AOS17 906	311.623	20314.3	1.70144	13.6506	2.05743	1.74875	2.30443	0.175233	0.80621	0.349852	1040.88	7.74923	1026.7	14.8873	997.469	43.8483	997.469	43.8483	104.352
AOS17 78	311.905	37153.3	2.05093	13.7923	2.56852	1.73497	2.72455	0.173836	0.891774	0.32731	1033.21	8.51343	1021.6	17.5512	997.664	52.3182	997.664	52.3182	103.563
AOS17 542	350.865	10102.2	30.2351	13.7577	1.71053	1.63878	1.89012	0.164184	0.689092	0.364576	979.986	6.26476	985.244	11.9195	997.841	35.7387	997.841	35.7387	98.2106
AOS17 752	81.0231	4601.51	1.6897	13.2529	4.59186	1.84751	4.86354	0.185076	1.20688	0.248149	1094.65	12.1503	1062.54	32.0515	998.056	95.7784	998.056	95.7784	109.678
AOS17 475	570.278	55175.6	7.20843	13.8054	0.73874	1.7135	1.08717	0.171584	0.753422	0.693011	1020.83	7.11311	1013.6	6.97091	998.858	15.9013	998.858	15.9013	102.2
AOS17 46	231.698	6644.66	1.66479	13.4652	4.26545	1.83366	4.35443	0.183597	0.69568	0.159764	1086.6	6.95649	1057.59	28.6185	999.069	87.3647	999.069	87.3647	108.761
AOS17 309	220.731	15069.9	3.15632	13.6524	1.92384	1.7518	2.17441	0.17538	0.745383	0.342798	1041.69	7.16968	1027.83	14.0561	999.306	41.4918	999.306	41.4918	104.241
AOS17 633	91.7538	3780.05	0.486075	13.1254	3.36582	1.68243	4.20997	0.168291	1.5254	0.36233	1002.69	14.1649	1001.9	26.8175	1001.04	79.704	1001.04	79.704	100.165
AOS17 747	353.582	13020.4	10.5642	13.615	1.3285	1.74149	1.5597	0.174107	0.733567	0.470325	1034.7	7.01241	1024.02	10.0605	1002.12	27.9259	1002.12	27.9259	103.252
AOS17 977	297.24	19642.5	3.20011	13.5174	1.36628	1.74296	1.61567	0.174231	0.790951	0.489551	1035.38	7.56554	1024.56	10.4247	1002.39	28.5945	1002.39	28.5945	103.291
AOS17 493	335.565	12554.9	1.93279	13.5264	0.831566	1.72504	1.26112	0.172382	0.832155	0.659852	1025.22	7.8876	1017.9	8.1063	1003.06	19.2189	1003.06	19.2189	102.209
AOS17 417	119.207	6609.36	2.13147	13.4128	1.96909	1.74741	2.84268	0.174577	1.05969	0.372779	1037.28	10.1532	1026.2	18.3602	1003.53	53.5558	1003.53	53.5558	103.364
AOS17 414	248.748	10144.1	5.5789	13.5436	0.973035	1.76814	1.39548	0.176573	0.964813	0.691386	1048.23	9.33399	1033.84	9.05092	1004.4	20.4515	1004.4	20.4515	104.364
AOS17 883	158.003	9402.19	2.22361	13.5477	3.45684	1.72942	3.74793	0.172692	1.19025	0.317576	1026.93	11.2992	1019.53	24.1175	1004.56	72.1414	1004.56	72.1414	102.227
AOS17 288	378.486	10646.5	1.85792	13.4955	1.38849	1.69561	1.74241	0.169179	0.889921	0.510743	1007.59	8.30112	1006.88	11.1292	1006.2	30.3755	1006.2	30.3755	100.138
AOS17 912	1009.79	50325.8	4.96212	13.5864	0.785843	1.72908	1.09053	0.172516	0.755747	0.693008	1025.96	7.16812	1019.41	7.01574	1006.23	15.9316	1006.23	15.9316	101.96
AOS17 95	161.761	4676.72	2.62661	13.1957	2.87977	1.82011	3.19243	0.181534	1.17934	0.369418	1075.35	11.6807	1052.73	20.924	1006.96	60.2153	1006.96	60.2153	106.792
AOS17 399	432.991	4791.01	2.52729	13.1579	1.0106	1.57296	1.48261	0.156724	0.946063	0.638107	938.548	8.26314	959.596	9.2035	1009.02	23.1419	1009.02	23.1419	93.016
AOS17 616	258.456	14267.1	3.80523	13.5186	1.95377	1.81629	2.22396	0.180839	0.827599	0.372129	1071.56	8.17034	1051.35	14.5645	1010.47	41.8781	1010.47	41.8781	106.045
AOS17 812	231.294	10084.2	1.27041	13.5691	1.60977	1.84478	1.796	0.18367	0.626969	0.349093	1086.99	6.27152	1061.57	11.8264	1010.54	34.1138	1010.54	34.1138	107.566
AOS17 454	135.198	3021.16	3.03282	12.8247	3.17573	1.81207	4.22458	0.180166	0.669426	0.15846	1067.88	6.58794	1049.83	27.6484	1013.32	84.5728	1013.32	84.5728	105.384
AOS17 870	618.029	37515.4	2.19025	13.6341	0.956514	1.77719	1.19572	0.176692	0.643568	0.538228	1048.88	6.2297	1037.15	7.76953	1013.38	20.422	1013.38	20.422	103.503
AOS17 566	196.909	12347.6	2.36017	13.4591	4.11584	1.76532	4.37696	0.175311	1.20581	0.27549	1041.31	11.5945	1032.8	28.3788	1015.71	85.2803	1015.71	85.2803	102.52
AOS17 743	71.8136	3643.49	1.07634	13.0241	7.22286	1.5956	9.00194	0.15843	0.672319	0.0746861	948.045	5.92736	968.491	56.2466	1016.04	182.209	1016.04	182.209	93.3075
AOS17 492	206.275	14485.9	3.16597	13.4683	1.70334	1.72948	1.9549	0.171715	0.757183	0.387326	1021.55	7.15329	1019.56	12.578	1016.13	36.5336	1016.13	36.5336	100.533
AOS17 783	424.299	41782.4	2.87422	13.5864	1.18654	1.79354	1.56695	0.177949	0.953387	0.608434	1055.76	9.28448	1043.11	10.2154	1017.57	25.1683	1017.57	25.1683	103.753
AOS17 725	131.295	7627.25	1.15154	13.369	2.54693	1.84904	2.92881	0.183257	1.19973	0.409632	1084.74	11.978	1063.09	19.3028	1019.77	54.1061	1019.77	54.1061	106.371
AOS17 869	173.797	29880.3	1.23499	13.5726	2.41464	1.88568	2.54412	0.186876	0.684065	0.268881	1104.43	6.94326	1076.06	16.8821	1019.91	49.627	1019.91	49.627	108.287
AOS17 1122	710.242	24278.9	1.1412	13.7679	1.23559	1.53577	1.55358	0.152195	0.651403	0.419291	913.257	5.5468	944.812	9.55417	1019.95	28.57	1019.95	28.57	89.5391
AOS17 665	760.812	11222.6	23.8093	13.3662	1.06289	1.77919	1.40718	0.176286	0.886876	0.630249	1046.65	8.56813	1037.88	9.14738	1020.32	22.1193	1020.32	22.1193	102.581
AOS17 273	84.3086	3643.1	1.11064	12.9853	6.49952	1.70818	7.99893	0.169235	3.36546	0.420739	1007.9	31.4019	1011.6	51.2727	1020.5	147.092	1020.5	147.092	98.7655
AOS17 26	1131.36	52641.7	7.19988	13.7569	0.518429	1.76135	0.860956	0.174469	0.677671	0.787114	1036.69	6.48954	1031.35	5.57622	1020.9	10.7505	1020.9	10.7505	101.547
AOS17 464	173.966	2829.58	1.48214	12.7999	3.61464	1.65333	4.78288	0.1637	1.21689	0.254427	977.304	11.0351	990.827	30.2703	1021.76	93.6764	1021.76	93.6764	95.6495
AOS17 632	275.31	25389.4	1.71526	13.5473	2.26988	1.81236	2.4375	0.179366	0.745561	0.305871	1063.51	7.30957	1049.93	15.9509	1022.66	46.9733	1022.66	46.9733	103.995
AOS17 677	659.103	31176.7	5.22796	13.5677	1.11001	1.74725	1.32185	0.172893	0.602145	0.455533	1028.03	5.72187	1026.15	8.53647	1022.99	23.8346	1022.99	23.8346	100.493
AOS17 954	645.355	46148.1	14.3336	13.4803	1.02191	1.74936	1.274	0.17308	0.69204	0.543201	1029.06	6.58218	1026.93	8.2311	1023.25	21.6658	1023.25	21.6658	100.568
AOS17 165	418.648	31453.4	5.22563	13.6691	1.26038	1.75059	1.64549	0.1732	0.964523	0.58616	1029.72	9.17924	1027.38	10.6341	1023.26	26.9991	1023.26	26.9991	100.631
AOS17 825	420.813	33974.7	2.7439	13.649	1.33832	1.74582	1.47432	0.172679	0.59234	0.401771	1026.86	5.62277	1025.62	9.51838	1023.85	27.3237	1023.85	27.3237	100.294
AOS17 311	439.116	28735.5	0.987433	13.5665	0.807964	1.85945	1.13471	0.183833	0.662509	0.583859	1087.88	6.63199	1066.79	7.49245	1024.77	18.6377	1024.77	18.6377	106.158
AOS17 111	295.994	3305.98	0.946958	12.9592	1.94974	1.85488	3.06659	0.183346	0.723764	0.236016	1085.23	7.22894	1065.17	20.2335	1025.17	60.2812	1025.17	60.2812	105.859
AOS17 1087	769.581	8411.92	3.41807	13.5672	0.710068	1.72271	0.963299	0.170268	0.603537	0.626531	1013.59	5.6607	1017.04	6.18881	1025.33	15.1896	1025.33	15.1896	98.8549
AOS17 280	165.125	11975.5	2.09985	13.4507	2.78729	1.92806	2.94146	0.190539	0.839142	0.285281	1124.3	8.65755	1090.87	19.6692	1025.59	57.0231	1025.59	57.0231	109.625
AOS17 1123	434.683	12154.1	3.20811	13.5737	0.568658	1.73632	0.92305	0.171386	0.598942	0.648873	1019.74	5.64909	1022.1	5.94734	1028.01	14.2033	1028.01	14.2033	99.1961
AOS17 1084	677.068	7371.25	5.95487	13.4967	1.18515	1.7233	1.49778	0.169981	0.650226	0.434128	1012.01	6.08983	1017.26	9.62398	1029.43	27.2992	1029.43	27.2992	98.3078
AOS17 538	416.31	30154.7	7.81312	13.7205	1.51414	1.57869	2.49792	0.155715	1.97421	0.790341	932.921	17.1472	961.855	15.5289	1029.46	30.9616	1029.46	30.9616	90.622
AOS17 597	523.241	26935.2	2.23967	13.592	1.22098	1.79774	1.58856	0.177307	0.891161	0.560988	1052.25	8.6519	1044.64	10.3649	1029.62	26.6069	1029.62	26.6069	102.198
AOS17 222	593.469	27102.6	2.35564	13.4893	0.731243	1.79166	1.05223	0.176584	0.719228	0.683526	1048.29	6.95848	1042.43	6.85712	1031.03	15.544	1031.03	15.544	101.674
AOS17 899	228.319	21330.3	1.36743	13.4238	2.34322	1.69925	2.48716	0.167279	0.831246	0.334216	997.1	7.67917	1008.25	15.8995	1033.41	47.3832	1033.41	47.3832	96.4862
AOS17 648	523.445	35004.1	2.04325	13.5065	1.80213	1.77106	1.97265	0.17431	0.791239	0.401104	1035.81	7.5712	1034.91	12.8024	1033.86	36.5321	1033.86	36.5321	100.189
AOS17 1051	100.181	7173.46	1.90341	13.2443	6.62248	1.55819	7.19408	0.153336	1.04912	0.145831	919.639	8.99149	953.749	44.5216	1034.15	143.979	1034.15	143.979	88.9266
AOS17 600	304.014	47116.9	2.9573	13.5967	2.24035	1.75986	2.42662	0.173182	0.874045	0.360191	1029.62	8.31742	1030.8	15.7129	1034.17	45.7521	1034.17	45.7521	99.5601
AOS17 261	782.016	13306.8	2.44664	13.3276	0.733391	1.89028	1.19783	0.185842	0.665119	0.55527	1098.81	6.71947	1077.68	7.95462	1036.04	20.1403	1036.04	20.1403	106.059
AOS17 503	306.459	14074.3	3.34907	13.3411	1.70888	1.81134	2.01595	0.177958	0.824814	0.409145	1055.81	8.0327	1049.56	13.1892	1037.44	37.1668	1037.44	37.1668	101.77
AOS17 698	670.741	38096.5	2.85025	13.4787	1.17727	1.80327	1.33181	0.177119	0.60953	0.457669	1051.21	5.91232	1046.64	8.69922	1037.98	23.9303	1037.98	23.9303	101.275
AOS17 1182	226.245	9098.01	1.57274	13.1288	1.49189	1.81531	1.68707	0.178257	0.699953	0.414893	1057.45	6.82644	1051	11.046	1038.47	31.012	1038.47	31.012	101.827
AOS17 661	577.519	31518	3.4151	13.3923	1.14394	1.79025	1.31229	0.175779	0.635668	0.484396	1043.88	6.12619	1041.91	8.54948	1038.66	23.1986	1038.66	23.1986	100.502
AOS17 340	228.706	9036.57	3.32873	13.2729	2.0325	1.86224	2.96556	0.182848	0.668657	0.225474	1082.51	6.66319	1067.78	19.5938	1038.67	58.353	1038.67	58.353	104.221
AOS17 508	163.263	9133.34	4.13471	13.2838	4.82602	1.87224	4.94818	0.183799	0.808404	0.163374	1087.7	8.09119	1071.32	32.7617	1039	98.6021	1039	98.6021	104.687
AOS17 580	302.429	14592.2	1.11913	13.4479	1.16431	1.74789	1.71322	0.171509	1.2364	0.721681	1020.42	11.6686	1026.38	11.0656	1039.97	23.9588	1039.97	23.9588	98.1206
AOS17 433	272.939	15432.7	1.87906	13.3503	2.72679	1.8891	2.90065	0.185325	0.720621	0.248434	1096	7.26309	1077.26	19.2606	1040.41	56.7294	1040.41	56.7294	105.343
AOS17 411	235.701	10844.3	2.06384	13.3645	2.26197	1.78721	2.43488	0.175285	0.838164	0.344231	1041.16	8.0584	1040.81	15.8544	1040.93	46.1441	1040.93	46.1441	100.023
AOS17 167	256.661	17801.4	1.84799	13.4872	1.94767	1.78762	2.30353	0.175319	0.592871	0.257375	1041.35	5.70101	1040.96	15.0002	1040.99	44.9482	1040.99	44.9482	100.035
AOS17 666	112.986	9216.81	1.73094	13.1812	3.44019	1.82741	3.74584	0.179174	1.02885	0.274664	1062.46	10.0778	1055.35	24.5873	1041.53	72.6976	1041.53	72.6976	102.01
AOS17 948	1117.03	15545	4.32579	13.3089	0.582961	1.76072	0.909098	0.172604	0.644987	0.70948	1026.44	6.12024	1031.11	5.88726	1041.89	12.9479	1041.89	12.9479	98.5176
AOS17 697	126.091	11074.1	3.39984	13.2835	1.79512	1.84795	2.05697	0.181066	0.813533	0.395501	1072.8	8.04	1062.7	13.5532	1042.88	38.1238	1042.88	38.1238	102.868
AOS17 368	358.887	5948.17	1.99851	13.0575	1.28788	1.72233	2.66347	0.168728	0.776002	0.29135	1005.1	7.22195	1016.89	17.1118	1043.24	51.4322	1043.24	51.4322	96.3434
AOS17 766	86.4949	3650.92	2.86708	12.795	5.15254	1.95129	5.4549	0.191026	1.10539	0.202642	1126.93	11.429	1098.89	36.6366	1044.62	107.825	1044.62	107.825	107.879
AOS17 1155	315.88	10386.9	2.27089	13.2752	1.48399	1.83228	1.79154	0.179183	0.783086	0.437102	1062.51	7.67086	1057.1	11.7688	1046.83	32.5074	1046.83	32.5074	101.498
AOS17 914	206.503	14602.1	1.3109	13.2332	2.85019	1.78526	3.05885	0.174572	0.618876	0.202324	1037.25	5.9295	1040.1	19.9103	1046.97	60.3982	1046.97	60.3982	99.0719
AOS17 239	581.98	27380.2	3.64377	13.7041	0.777494	1.82619	1.08577	0.178559	0.741666	0.683079	1059.1	7.24365	1054.91	7.12393	1047.16	16.0098	1047.16	16.0098	101.14
AOS17 818	303.646	15193.9	1.78826	13.3818	1.45359	1.86535	1.92424	0.182373	0.792658	0.411933	1079.93	7.88153	1068.88	12.7202	1047.32	35.3567	1047.32	35.3567	103.114
AOS17 1000	1112.91	28211.1	7.97061	13.4358	0.731151	1.79812	1.08235	0.175754	0.784228	0.724559	1043.73	7.55699	1044.78	7.06249	1047.85	15.0584	1047.85	15.0584	99.6074
AOS17 880	554.219	26826.4	3.31943	13.3686	1.16094	1.79456	1.40773	0.175288	0.65188	0.463072	1041.18	6.26748	1043.48	9.1792	1049.21	25.1698	1049.21	25.1698	99.2343
AOS17 107	176.359	3160.65	3.01616	12.8051	2.62389	1.84861	3.67396	0.180549	2.37505	0.646455	1069.97	23.4155	1062.93	24.2136	1049.41	56.5239	1049.41	56.5239	101.959
AOS17 89	93.4909	5530.56	1.94911	13.001	5.58145	1.85522	5.78794	0.181103	0.680139	0.11751	1073	6.72285	1065.29	38.2046	1050.44	115.929	1050.44	115.929	102.148
AOS17 1124	444.156	14720	2.57075	13.4921	0.775316	1.87937	1.26299	0.183433	0.653239	0.517215	1085.7	6.52715	1073.84	8.37058	1050.73	21.8032	1050.73	21.8032	103.328
AOS17 751	579.528	45867.3	5.65359	13.4367	0.790902	1.82783	1.05504	0.178402	0.693716	0.657524	1058.24	6.77027	1055.5	6.92451	1050.74	16.0389	1050.74	16.0389	100.714
AOS17 745	380.376	14400.6	1.55627	13.3063	1.54846	1.83072	2.81382	0.178559	2.28384	0.811652	1059.1	22.3058	1056.54	18.4799	1052.15	33.1263	1052.15	33.1263	100.66
AOS17 1178	1318.07	91475.7	15.9824	13.3004	0.66228	1.73516	0.985557	0.169158	0.71244	0.72288	1007.47	6.64486	1021.67	6.34855	1053.11	13.7379	1053.11	13.7379	95.6665
AOS17 777	219.859	39543.8	1.26474	13.2686	2.45604	1.87833	2.59356	0.183092	0.751982	0.289942	1083.84	7.50198	1073.47	17.187	1053.37	50.0111	1053.37	50.0111	102.893
AOS17 300	2089.12	55515.3	3.17541	13.3439	0.563628	1.85828	0.902544	0.181124	0.704326	0.780378	1073.11	6.9626	1066.37	5.95812	1053.52	11.3886	1053.52	11.3886	101.86
AOS17 195	198.639	10344.8	2.05066	13.2787	2.97692	1.53493	4.15973	0.14951	2.7123	0.652037	898.214	22.7412	944.474	25.5805	1054.83	63.5422	1054.83	63.5422	85.1523
AOS17 1021	391.886	4082.25	2.59522	12.8394	1.22946	1.89844	2.89759	0.184892	0.540053	0.18638	1093.64	5.43242	1080.54	19.2731	1055.12	57.3451	1055.12	57.3451	103.651
AOS17 220	333.085	16695.9	3.51984	13.2713	1.4069	1.86933	1.62741	0.182034	0.629118	0.386576	1078.08	6.24558	1070.29	10.7659	1055.36	30.2345	1055.36	30.2345	102.152
AOS17 259	46.3138	2894.75	0.794219	12.5642	7.16465	1.79536	8.32236	0.174809	1.41761	0.170337	1038.55	13.5979	1043.77	54.3256	1055.61	165.399	1055.61	165.399	98.384
AOS17 209	693.933	36401.3	3.57758	13.3676	0.898636	1.83031	1.15935	0.178202	0.695976	0.600317	1057.14	6.78587	1056.39	7.61276	1055.73	18.6914	1055.73	18.6914	100.134
AOS17 1008	238.376	13372.7	2.32559	13.2996	1.69646	1.79074	2.52999	0.174321	1.34184	0.530374	1035.87	12.8405	1042.09	16.4854	1056.05	43.1953	1056.05	43.1953	98.0891
AOS17 670	609.905	37017.3	1.24477	13.2936	1.07348	1.85874	1.36133	0.180883	0.823438	0.604878	1071.8	8.13093	1066.54	8.98769	1056.69	21.8465	1056.69	21.8465	101.429
AOS17 808	147.342	12863.3	2.26723	13.3002	5.70554	1.81201	5.85605	0.17631	0.790685	0.13502	1046.79	7.63972	1049.8	38.3341	1056.98	116.926	1056.98	116.926	99.0351
AOS17 38	224.428	5542.68	3.89506	13.1021	1.13179	1.99877	1.60283	0.194428	0.785943	0.490347	1145.32	8.24723	1115.1	10.8481	1057.55	28.1249	1057.55	28.1249	108.299
AOS17 529	950.352	43683.1	4.07325	13.4899	0.63364	1.79121	0.886044	0.174036	0.59897	0.676005	1034.31	5.72374	1042.27	5.77356	1059.88	13.1401	1059.88	13.1401	97.5869
AOS17 418	828.223	32534.1	10.5379	13.4272	1.1886	1.87996	1.40705	0.182652	0.722302	0.513344	1081.45	7.19126	1074.05	9.32642	1059.96	24.3217	1059.96	24.3217	102.027
AOS17 688	73.8207	6144.71	2.09448	12.955	1.67859	1.92214	2.16797	0.186696	1.11122	0.512563	1103.45	11.2697	1088.81	14.4809	1060.54	37.4621	1060.54	37.4621	104.046
AOS17 754	199.904	9411.69	4.09592	13.1171	2.09387	1.80231	2.51075	0.175032	1.01871	0.40574	1039.78	9.78224	1046.3	16.3978	1060.83	46.1959	1060.83	46.1959	98.0157
AOS17 1149	1403.48	141630	3.52389	13.4505	0.739072	1.73282	1.10612	0.168251	0.821483	0.742672	1002.47	7.62675	1020.8	7.12166	1061.21	14.9038	1061.21	14.9038	94.4645
AOS17 164	705.312	23182.1	5.52035	13.385	0.680019	1.84275	1.07915	0.178892	0.762118	0.706222	1060.92	7.45515	1060.84	7.10306	1061.59	15.3722	1061.59	15.3722	99.9367
AOS17 246	1364.15	47369.6	3.80623	13.4602	0.633876	1.83251	0.997134	0.177889	0.765842	0.768043	1055.43	7.45592	1057.18	6.55035	1061.69	12.8478	1061.69	12.8478	99.4098
AOS17 1009	627.386	23150.3	1.50331	13.3418	0.940197	1.75813	1.2728	0.170661	0.713279	0.560402	1015.75	6.70317	1030.16	8.23825	1061.78	21.21	1061.78	21.21	95.665
AOS17 94	383.418	22664.2	2.2087	13.2525	1.34961	1.90448	1.5018	0.184857	0.619864	0.412747	1093.45	6.23426	1082.66	9.99919	1061.88	27.5327	1061.88	27.5327	102.973
AOS17 771	519.282	33528.3	1.45141	13.2016	1.0129	1.96169	1.24967	0.19041	0.607348	0.486009	1123.59	6.26251	1102.46	8.40474	1061.89	21.9736	1061.89	21.9736	105.811
AOS17 1161	567.465	33154.9	2.81443	13.3567	0.869544	1.75601	1.1608	0.170421	0.720967	0.621095	1014.43	6.76728	1029.38	7.51002	1062.19	18.3222	1062.19	18.3222	95.5038
AOS17 896	625.28	41787.6	2.3073	13.3089	0.549784	1.91044	0.860518	0.185407	0.603444	0.701256	1096.45	6.08435	1084.74	5.73547	1062.19	12.3425	1062.19	12.3425	103.225
AOS17 223	603.2	8223.28	2.05643	13.013	1.05068	1.72231	1.44775	0.167036	0.611969	0.422702	995.759	5.64642	1016.89	9.3006	1063.56	26.3997	1063.56	26.3997	93.6249
AOS17 64	560.158	20035.7	5.69088	13.3189	1.2399	1.84759	1.62418	0.179153	0.894888	0.550979	1062.35	8.76477	1062.57	10.7006	1063.92	27.2632	1063.92	27.2632	99.8515
AOS17 591	489.215	23985.7	0.761903	13.3962	1.13728	1.79187	1.514	0.173747	0.913643	0.603462	1032.72	8.7184	1042.51	9.8669	1063.97	24.2915	1063.97	24.2915	97.0634
AOS17 576	252.157	13716.9	2.07438	13.2313	2.12607	1.85572	2.36444	0.1799	1.00357	0.424442	1066.43	9.86396	1065.47	15.6023	1064.39	43.0764	1064.39	43.0764	100.192
AOS17 1029	192.942	18015.2	1.03134	13.191	4.08429	1.97455	4.16818	0.191418	0.597559	0.143362	1129.05	6.18895	1106.86	28.1018	1064.41	82.9773	1064.41	82.9773	106.073
AOS17 409	192.775	9270.88	1.42638	13.1615	1.57524	1.9379	1.77602	0.18768	0.63388	0.35691	1108.8	6.4572	1094.27	11.8958	1066.39	33.3582	1066.39	33.3582	103.977
AOS17 1181	240.179	31202.1	1.00028	13.1388	1.61508	1.85972	1.79883	0.180087	0.773651	0.430086	1067.45	7.61082	1066.89	11.8785	1066.63	32.6625	1066.63	32.6625	100.077
AOS17 413	369.577	17407.1	0.961109	13.2406	1.18287	1.87868	1.50643	0.181893	0.773189	0.513258	1077.31	7.67081	1073.6	9.98283	1066.97	25.9926	1066.97	25.9926	100.968
AOS17 1195	1583.1	90105	15.5143	13.2784	0.634104	1.83998	0.929665	0.178089	0.676999	0.728218	1056.53	6.5973	1059.85	6.11588	1067.6	12.8073	1067.6	12.8073	98.9631
AOS17 572	287.205	16388.3	2.52375	13.195	2.07592	1.84117	2.30966	0.178203	0.769632	0.333224	1057.15	7.50405	1060.28	15.1987	1067.63	43.7798	1067.63	43.7798	99.0184
AOS17 1060	952.678	38530.7	5.32108	13.3826	0.687692	1.84252	1.01815	0.178195	0.744924	0.731645	1057.1	7.26287	1060.76	6.70126	1069.19	13.9298	1069.19	13.9298	98.8696
AOS17 823	363.133	22683	1.39435	13.2918	1.14166	1.84161	1.38122	0.178079	0.584688	0.423313	1056.47	5.69745	1060.44	9.08944	1069.49	25.1682	1069.49	25.1682	98.7824
AOS17 1047	612.366	49913.6	4.73545	13.2635	1.01726	1.88626	1.21009	0.182346	0.644685	0.532757	1079.78	6.40941	1076.27	8.03014	1070.05	20.5598	1070.05	20.5598	100.909
AOS17 385	481.916	13025.3	3.04118	13.1136	1.12303	1.89982	1.30368	0.183598	0.634453	0.486663	1086.6	6.34427	1081.03	8.67267	1070.7	22.8845	1070.7	22.8845	101.485
AOS17 649	161.532	12737.8	1.14163	13.1225	3.29288	1.8253	3.54274	0.176346	1.01364	0.286117	1046.98	9.79563	1054.59	23.2442	1071.27	68.2329	1071.27	68.2329	97.733
AOS17 938	1063	51754.4	12.3513	13.2207	0.702653	1.88526	0.964412	0.182014	0.636568	0.660059	1077.97	6.31897	1075.91	6.39859	1072.64	14.5419	1072.64	14.5419	100.497
AOS17 1070	175.431	2257.98	1.36427	12.427	2.67279	2.0534	3.27499	0.198202	1.01387	0.309581	1165.65	10.8114	1133.43	22.3666	1073.11	62.5816	1073.11	62.5816	108.624
AOS17 656	309.74	16118.6	4.42182	13.1545	1.88108	1.7177	2.12139	0.165739	0.807924	0.380846	988.591	7.40478	1015.16	13.6151	1073.83	39.3977	1073.83	39.3977	92.062
AOS17 441	243.367	13725.4	2.45025	13.1214	0.860335	1.91881	1.13035	0.185039	0.630589	0.55787	1094.45	6.3474	1087.65	7.54531	1074.97	18.8371	1074.97	18.8371	101.812
AOS17 763	134.576	10888.7	1.66344	13.0386	3.82037	1.88679	3.98049	0.18195	1.06648	0.267926	1077.62	10.5833	1076.45	26.4225	1074.99	77.033	1074.99	77.033	100.244
AOS17 266	260.617	15358.2	2.41757	13.0775	1.96456	1.84318	2.11512	0.177691	0.690156	0.326297	1054.35	6.71274	1061	13.9237	1075.6	40.1656	1075.6	40.1656	98.0243
AOS17 500	353.061	27298.4	1.61686	13.1276	1.25271	1.91588	1.55722	0.184629	0.829196	0.532483	1092.21	8.33093	1086.64	10.3895	1076.36	26.4431	1076.36	26.4431	101.473
AOS17 523	773.158	27514.1	3.82198	13.2536	0.811981	1.90128	1.09211	0.18321	0.645944	0.591462	1084.49	6.44762	1081.54	7.26711	1076.5	17.6792	1076.5	17.6792	100.742
AOS17 848	60.7735	3589.07	2.83433	12.5884	7.27902	1.97348	7.54006	0.190155	1.5713	0.208393	1122.21	16.1838	1106.5	50.8552	1076.62	148.217	1076.62	148.217	104.235
AOS17 545	418.335	31620	2.04847	13.4024	1.14763	1.89	1.3171	0.181974	0.537566	0.408142	1077.75	5.33521	1077.58	8.74629	1078.11	24.134	1078.11	24.134	99.9668
AOS17 807	570.977	6650.66	1.75259	12.9354	0.680717	1.54006	1.49569	0.148258	1.01201	0.676616	891.19	8.42324	946.528	9.20823	1078.41	22.092	1078.41	22.092	82.6391
AOS17 428	86.2311	6812.09	1.51561	12.999	2.50441	2.08088	2.81438	0.200261	0.923006	0.327961	1176.72	9.92759	1142.53	19.3036	1079.03	53.375	1079.03	53.375	109.054
AOS17 116	205.012	11783.9	1.25262	13.2003	2.35954	1.93777	2.90513	0.186446	0.593497	0.204293	1102.1	6.01233	1094.23	19.4596	1079.5	57.0954	1079.5	57.0954	102.094
AOS17 1045	171.522	11139.7	0.650684	13.0192	1.98713	1.82374	2.21316	0.17531	0.92251	0.41683	1041.3	8.87041	1054.03	14.5148	1081.36	40.3768	1081.36	40.3768	96.2954
AOS17 603	517.066	34318.8	3.34199	13.2163	1.15835	1.87941	1.44521	0.180624	0.860713	0.595561	1070.38	8.4887	1073.85	9.5784	1081.8	23.2699	1081.8	23.2699	98.9448
AOS17 260	528.921	31351.5	4.21345	13.1363	0.69324	1.8913	0.999272	0.181746	0.668173	0.668659	1076.51	6.62442	1078.04	6.63723	1081.99	14.9049	1081.99	14.9049	99.4931
AOS17 877	327.769	15227.1	4.21056	13.1004	2.43874	1.77373	2.61062	0.170349	0.714045	0.273515	1014.03	6.69989	1035.89	16.9526	1083.16	50.3674	1083.16	50.3674	93.6178
AOS17 721	25.4391	732.682	0.984935	10.5612	9.33091	1.51253	18.2612	0.145184	2.65596	0.145443	873.908	21.7062	935.463	112.075	1084.3	365.158	1084.3	365.158	80.5966
AOS17 1036	344.098	21921	10.2583	13.0695	2.08621	1.88798	2.32043	0.181198	0.860156	0.370688	1073.51	8.506	1076.87	15.4041	1084.57	43.236	1084.57	43.236	98.9805
AOS17 979	260.993	24651.2	1.85717	13.0633	1.14415	1.88566	1.6133	0.180959	0.892593	0.553273	1072.21	8.81694	1076.06	10.7048	1084.74	26.9274	1084.74	26.9274	98.8449
AOS17 942	147.628	11596.1	2.79415	12.9563	2.17751	1.82311	2.35425	0.174861	0.741369	0.314906	1038.84	7.1131	1053.8	15.4384	1085.8	44.8011	1085.8	44.8011	95.6753
AOS17 613	206.236	8228.73	2.49561	12.9059	3.21825	1.89214	3.31057	0.181465	0.744382	0.22485	1074.98	7.37034	1078.33	21.9956	1086.01	64.7018	1086.01	64.7018	98.9839
AOS17 92	182.673	8092.14	2.31706	12.911	2.05354	2.00505	3.01014	0.192232	0.672665	0.223467	1133.46	6.99169	1117.22	20.3961	1086.66	58.8428	1086.66	58.8428	104.307
AOS17 804	159.601	15136.1	2.40754	13.0796	4.0936	1.84189	4.18994	0.17658	0.800347	0.191016	1048.26	7.74312	1060.54	27.5804	1086.74	82.4718	1086.74	82.4718	96.4589
AOS17 724	398.287	23394.1	1.60078	13.1375	0.967172	1.95859	1.20351	0.187488	0.65275	0.542373	1107.75	6.64369	1101.4	8.08997	1089.76	20.2404	1089.76	20.2404	101.651
AOS17 502	95.4516	5260.39	2.18052	12.6794	3.38536	1.89439	4.14576	0.181009	1.73484	0.418461	1072.49	17.1406	1079.12	27.5583	1093.44	75.4247	1093.44	75.4247	98.0839
AOS17 842	657.553	15234.3	3.56275	12.9951	0.873177	1.96599	1.61593	0.187818	0.654137	0.404805	1109.55	6.66769	1103.94	10.8763	1093.79	29.5698	1093.79	29.5698	101.441
AOS17 858	224.272	11941.9	2.08284	12.9655	1.63452	2.14221	2.13787	0.20464	0.972397	0.454844	1200.2	10.6487	1162.54	14.8002	1093.92	38.1122	1093.92	38.1122	109.716
AOS17 640	1047.76	11050	1.97676	12.9659	0.798125	1.69003	1.46831	0.161362	0.737859	0.502521	964.34	6.60883	1004.78	9.36696	1094.95	25.4164	1094.95	25.4164	88.0718
AOS17 214	354.109	8450.86	4.10985	12.8592	0.997121	1.66798	2.0733	0.15925	1.27116	0.613109	952.61	11.257	996.416	13.1621	1095.01	32.7928	1095.01	32.7928	86.9953
AOS17 1196	145.572	8940.75	2.7167	12.8476	1.77578	2.11085	2.18208	0.201366	1.01194	0.463748	1182.65	10.9341	1152.35	15.0352	1096.66	38.6786	1096.66	38.6786	107.841
AOS17 980	499.654	28686.8	3.4465	12.9928	0.920957	1.88954	1.25225	0.180155	0.819944	0.654774	1067.82	8.06882	1077.42	8.31496	1097.78	18.9463	1097.78	18.9463	97.2709
AOS17 204	139.384	10145.1	1.22557	13.0327	3.1731	1.94532	3.4255	0.185395	0.684016	0.199683	1096.38	6.89637	1096.83	22.9767	1098.62	67.1788	1098.62	67.1788	99.7962
AOS17 645	257.215	15121.9	2.09933	12.9881	0.937842	1.93984	1.30953	0.184836	0.884336	0.675308	1093.34	8.89332	1094.94	8.77402	1099.01	19.3431	1099.01	19.3431	99.4841
AOS17 36	746.851	55807.9	6.31144	13.2169	0.95869	2.0013	1.14722	0.190444	0.606112	0.528331	1123.78	6.25072	1115.95	7.76763	1101.62	19.4949	1101.62	19.4949	102.011
AOS17 294	135.258	5260.18	1.15601	12.5989	2.20507	1.92492	2.50489	0.18299	0.554886	0.221521	1083.29	5.53309	1089.78	16.7401	1103.64	48.8266	1103.64	48.8266	98.156
AOS17 1100	997.966	86212.1	6.4674	13.1982	0.580124	1.94786	0.813759	0.185133	0.55485	0.681836	1094.95	5.58741	1097.71	5.45985	1104.04	11.9204	1104.04	11.9204	99.1775
AOS17 1148	312.534	18854.4	1.59114	12.9911	2.23259	1.89472	2.40246	0.179995	0.79069	0.329117	1066.95	7.77507	1079.24	15.9684	1105	45.3472	1105	45.3472	96.5565
AOS17 947	404.478	24099.7	4.1067	12.9504	0.969424	1.97077	1.4359	0.187129	0.888855	0.619022	1105.8	9.03218	1105.57	9.67242	1105.99	22.5593	1105.99	22.5593	99.9827
AOS17 931	332.627	27962.7	3.56878	12.9191	1.52301	2.04672	1.81665	0.194291	0.74958	0.412618	1144.58	7.86101	1131.2	12.3922	1106.5	33.0683	1106.5	33.0683	103.441
AOS17 501	561.604	17022.7	23.3791	12.8767	1.26276	1.97687	1.45862	0.187599	0.675497	0.463108	1108.36	6.87865	1107.65	9.83564	1107.16	25.8345	1107.16	25.8345	100.108
AOS17 174	384.936	30638	4.96861	13.1077	0.932882	1.98546	1.27157	0.188412	0.6916	0.543894	1112.77	7.06829	1110.58	8.58679	1107.19	21.3368	1107.19	21.3368	100.504
[truncated: 521 more rows]
